# Supplementary material for: Template switching during DNA replication is a prevalent source of adaptive gene amplification
Source: eLife journal article supplement (doi:10.7554/elife.98934), 2024-08-02

# Wildtype population 1

Generation 0

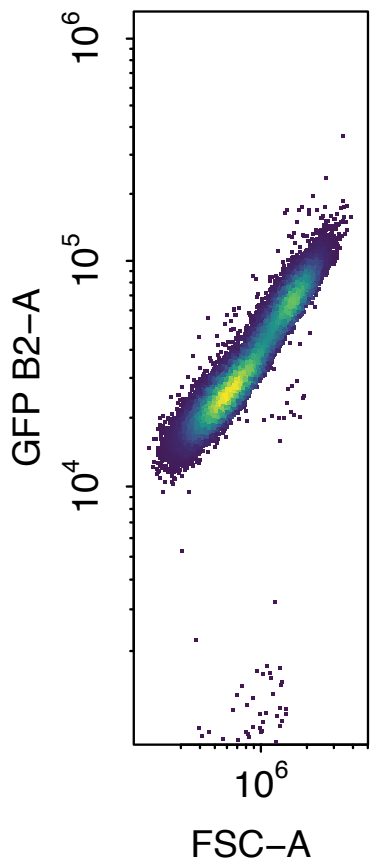

Generation 8

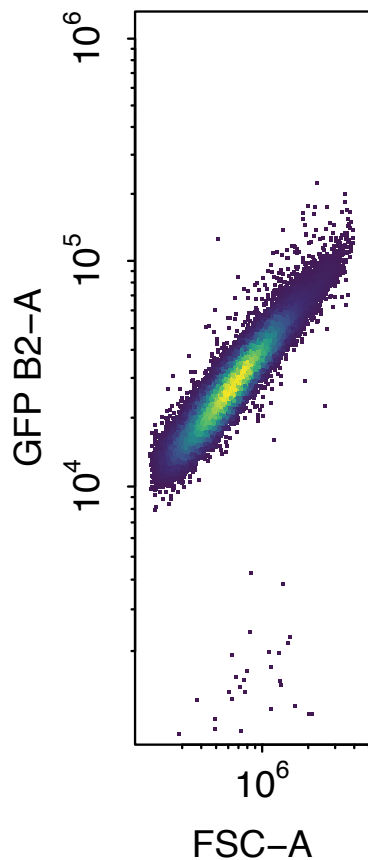

Generation 21

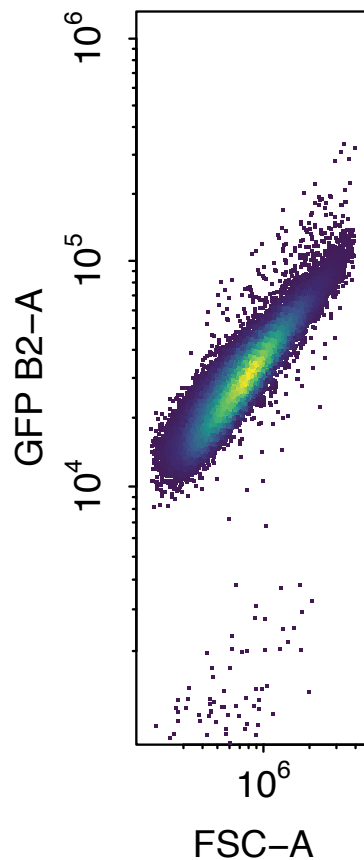

Generation 29

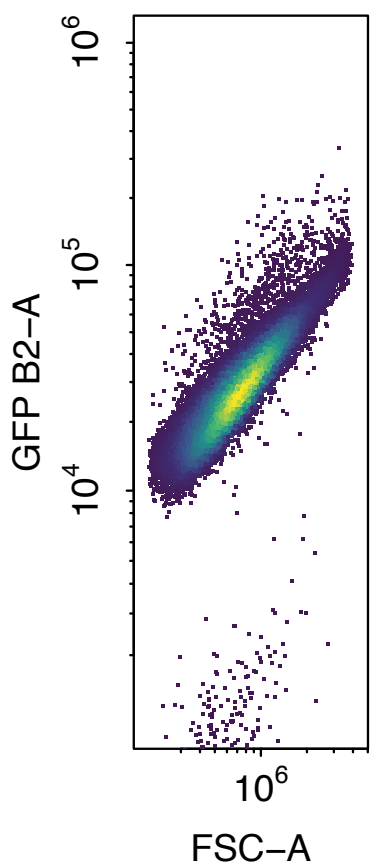

Generation 50

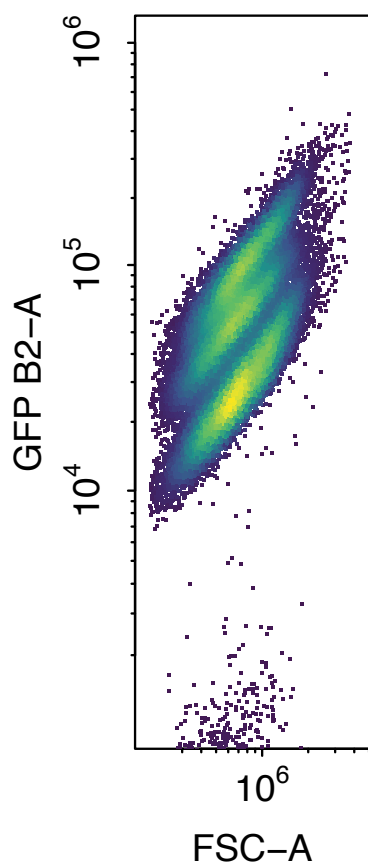

Key

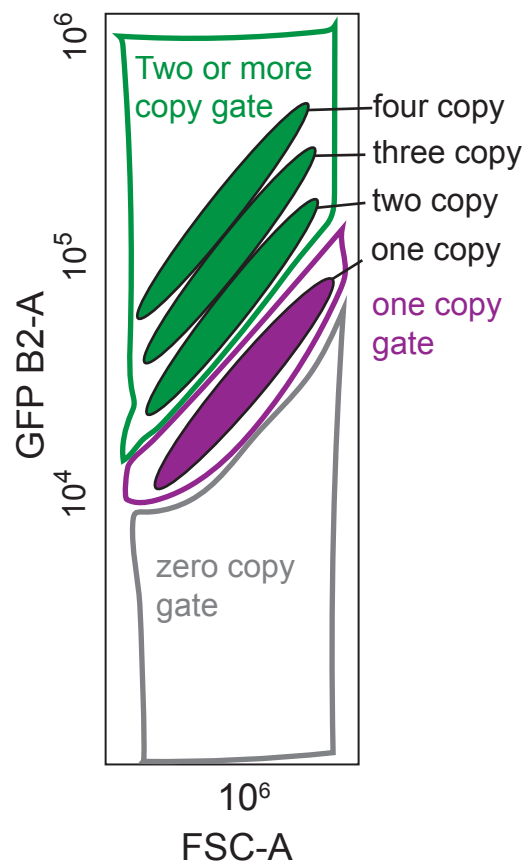

# Wildtype population 1

Generation 58

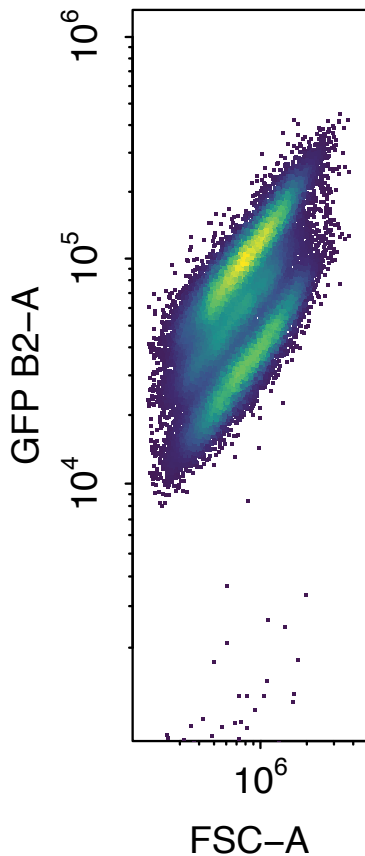

Generation 66

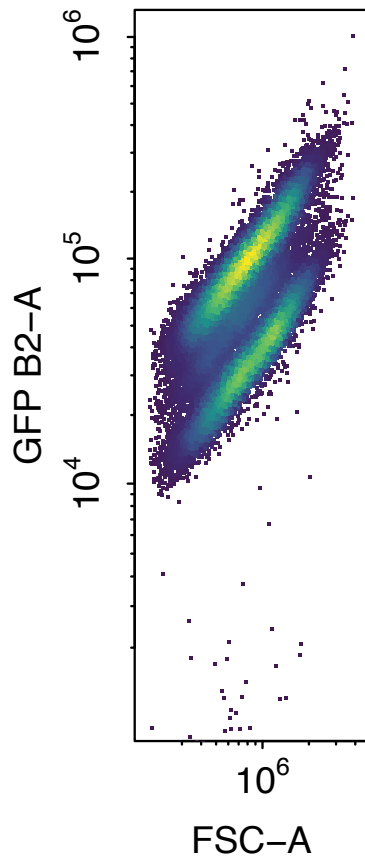

Generation 79

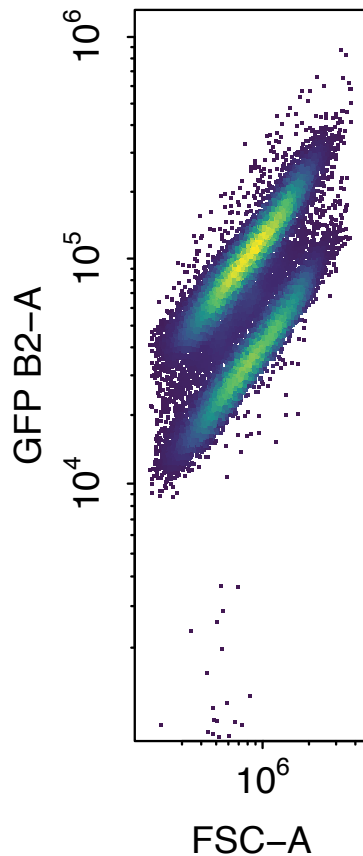

Generation 87

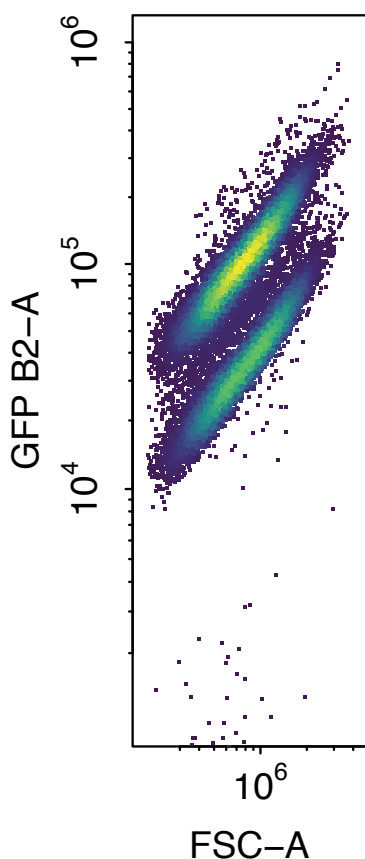

Generation 95

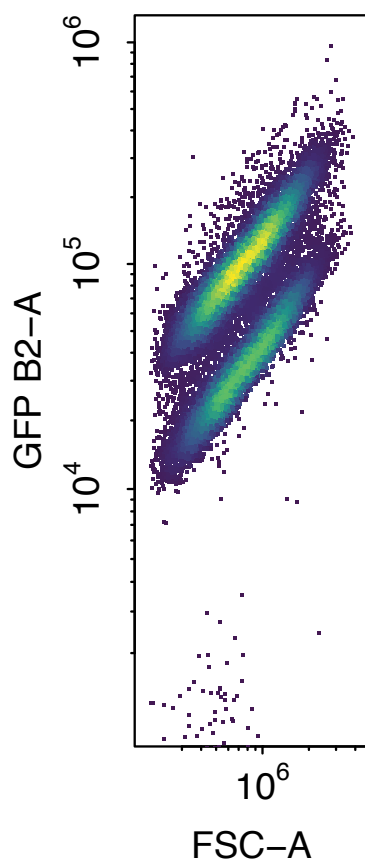

Key

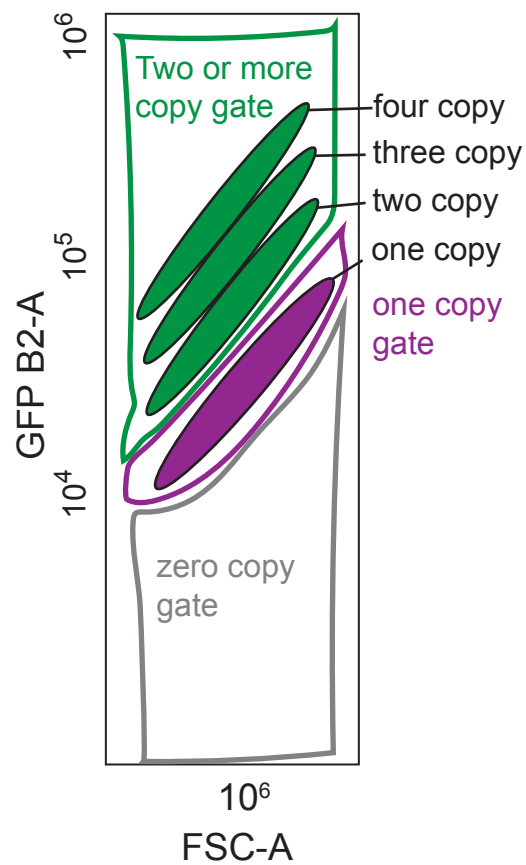

# Wildtype population 1

Generation 108

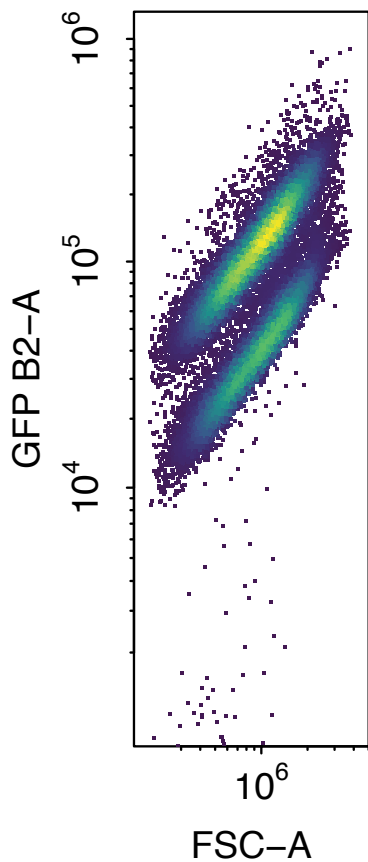

Generation 116

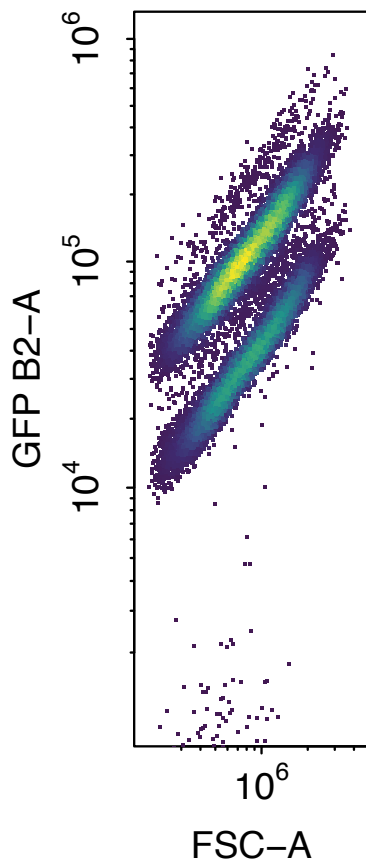

Generation 124

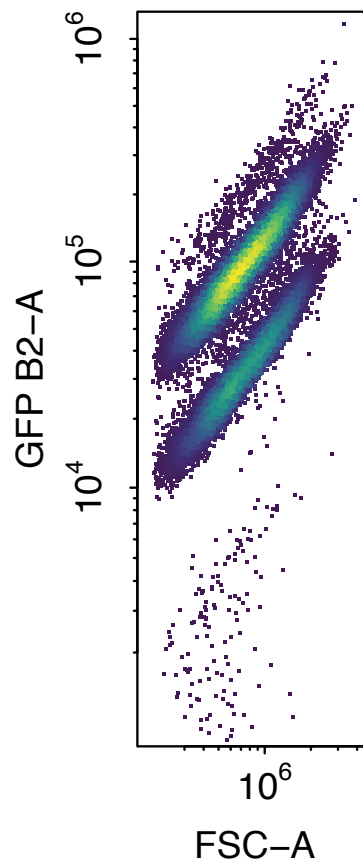

Generation 137

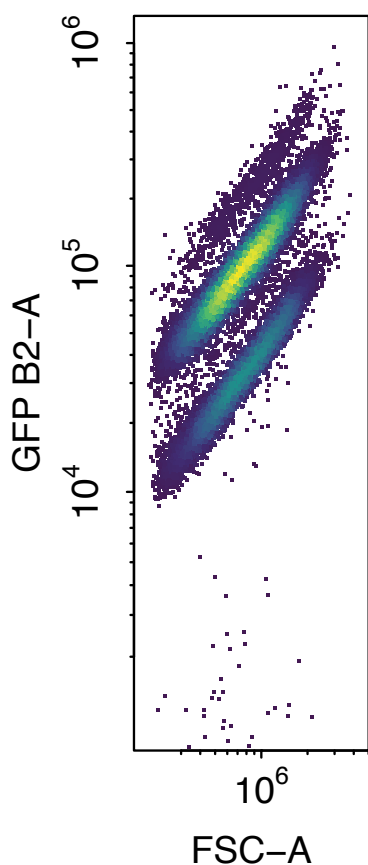

Generation 153

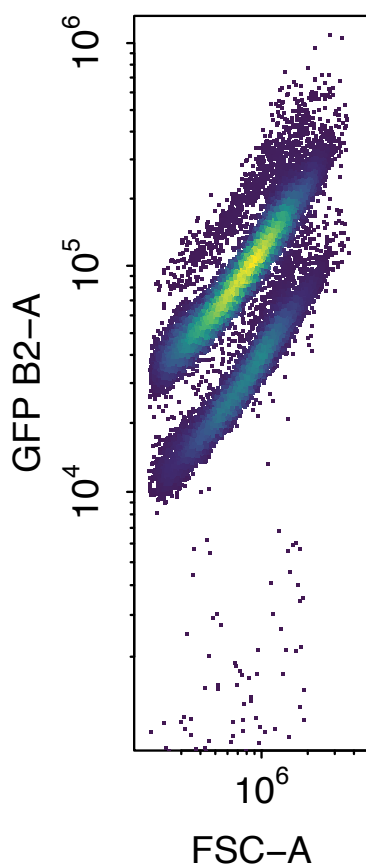

Key

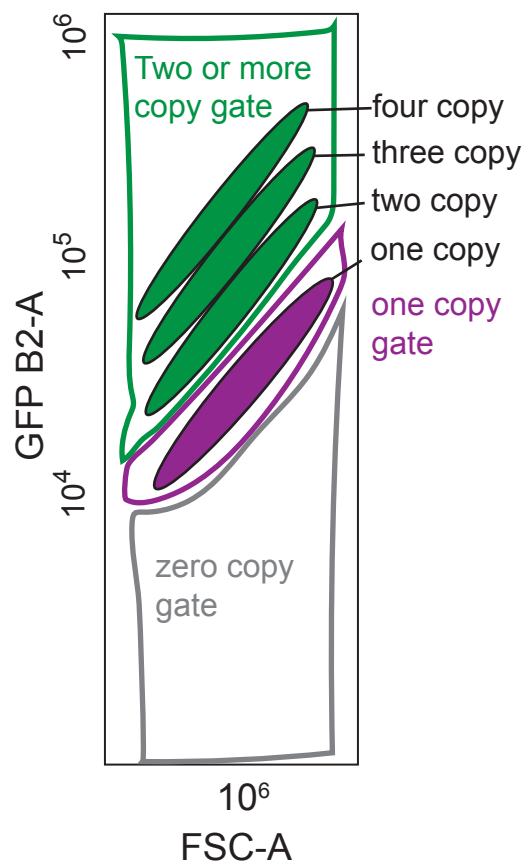

# Wildtype population 2

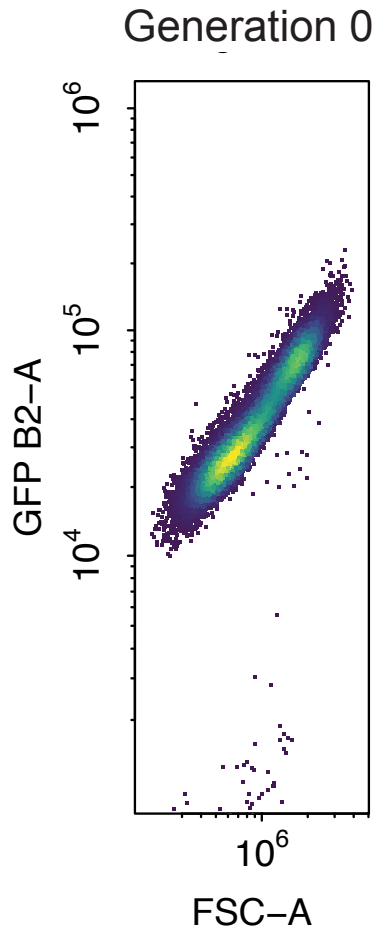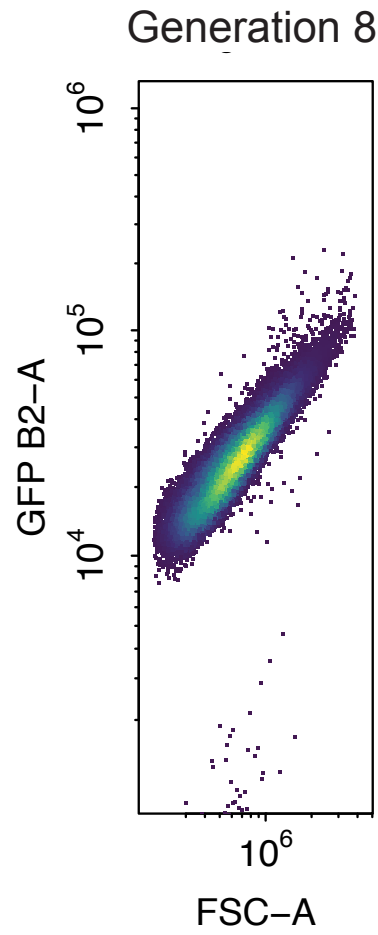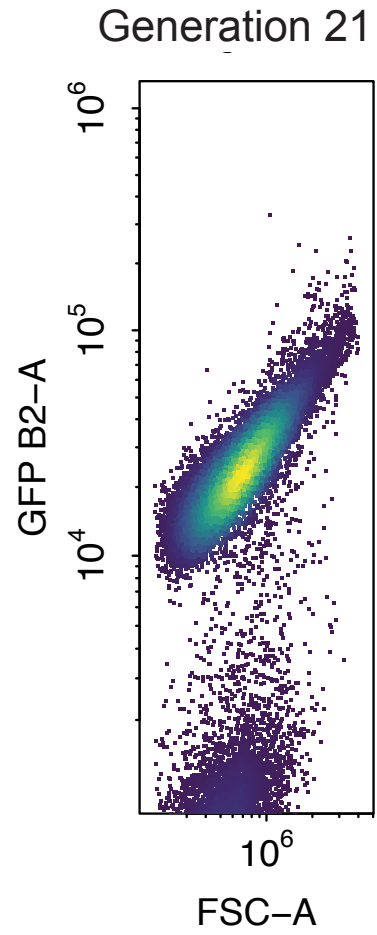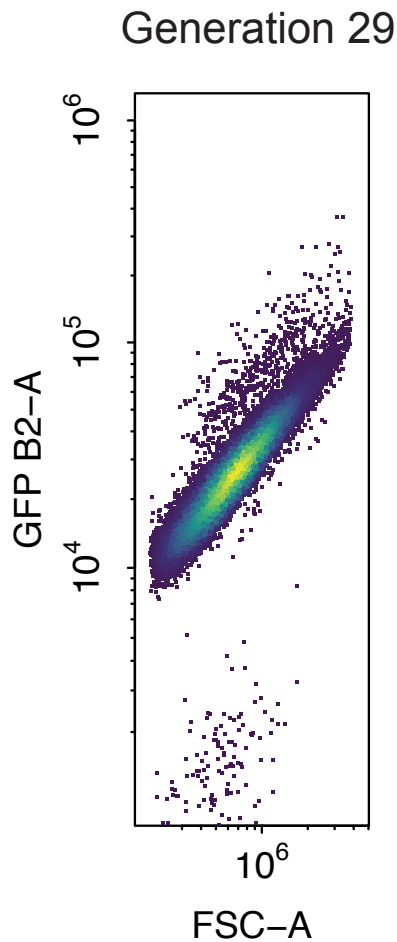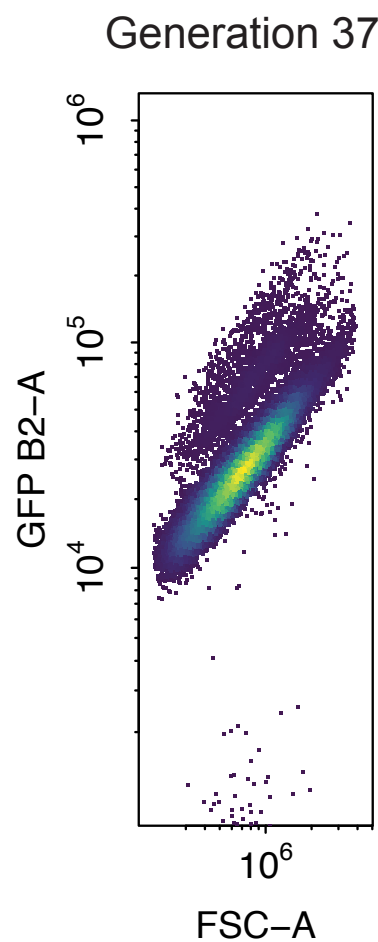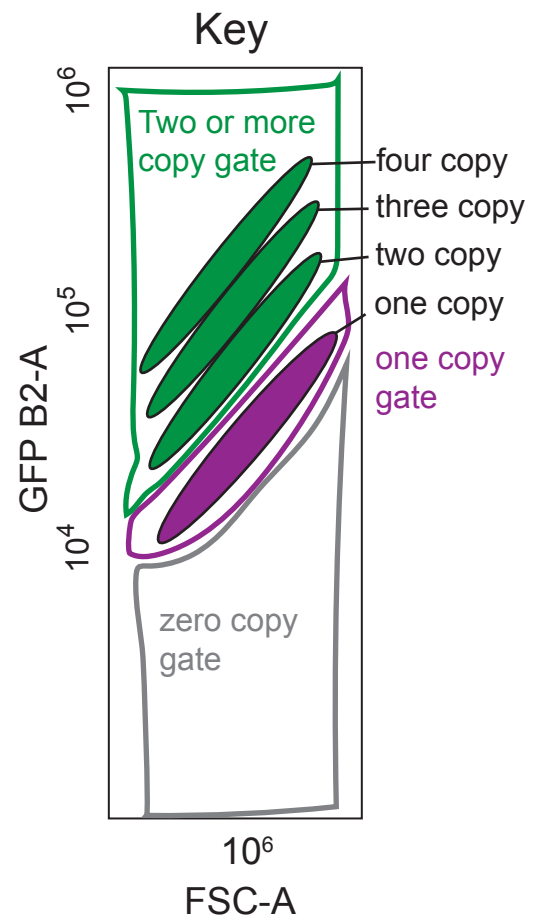

# Wildtype population 2

Generation 50

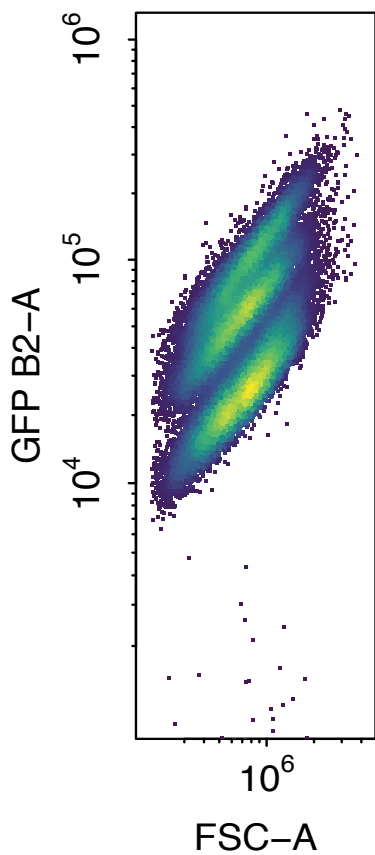

Generation 58

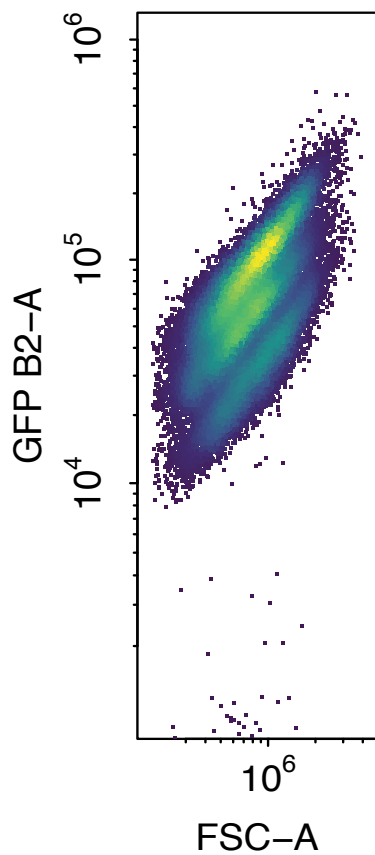

Generation 66

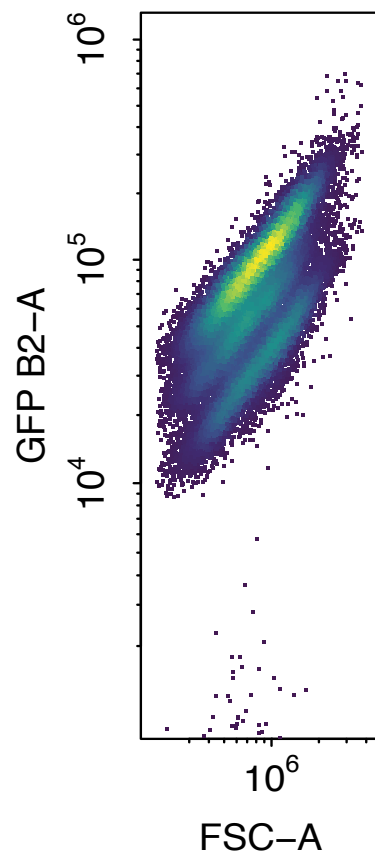

Generation 79

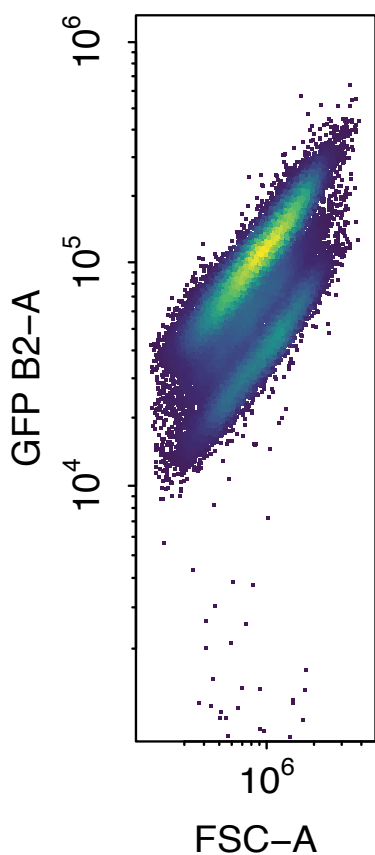

Generation 87

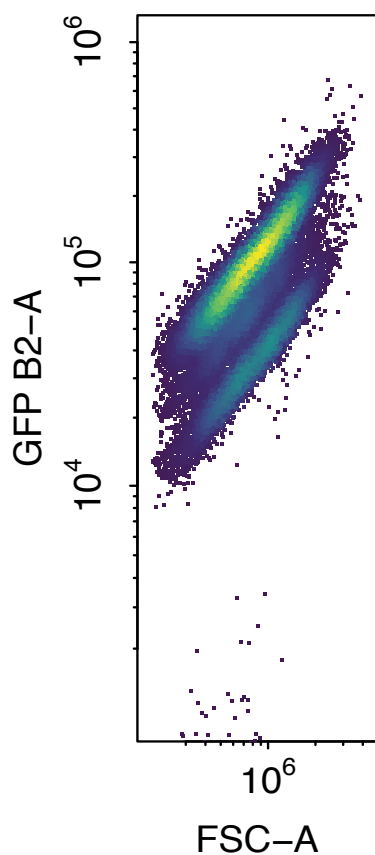

Key

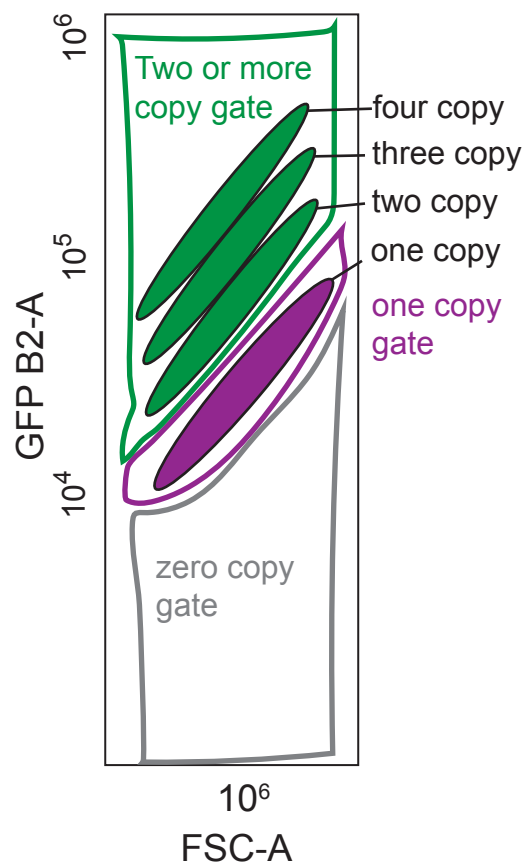

# Wildtype population 2

Generation 95

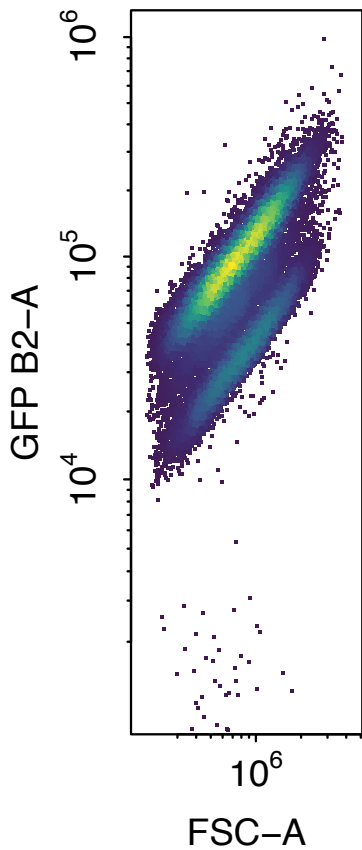

Generation 108

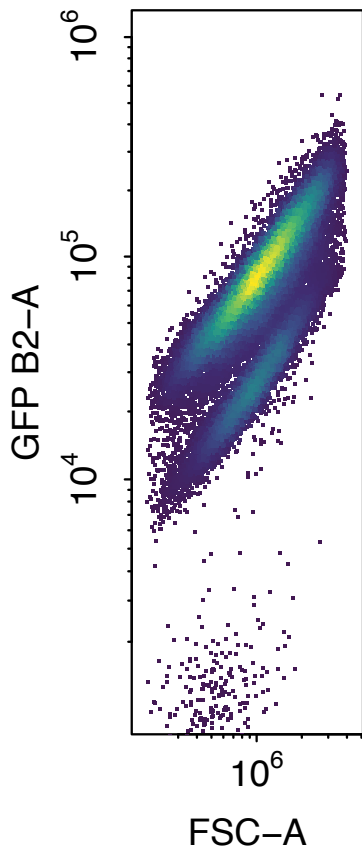

Generation 116

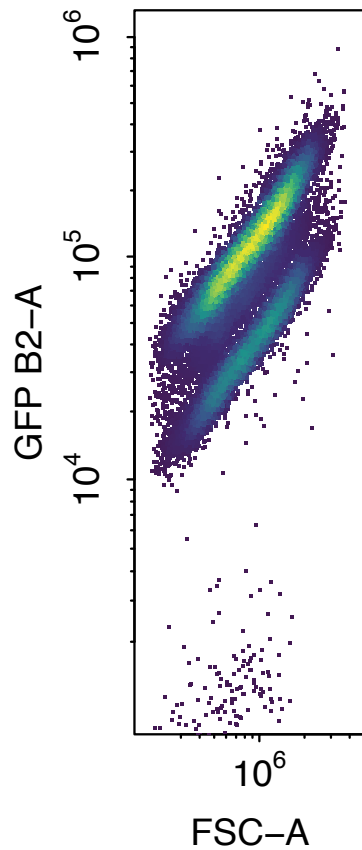

Generation 124

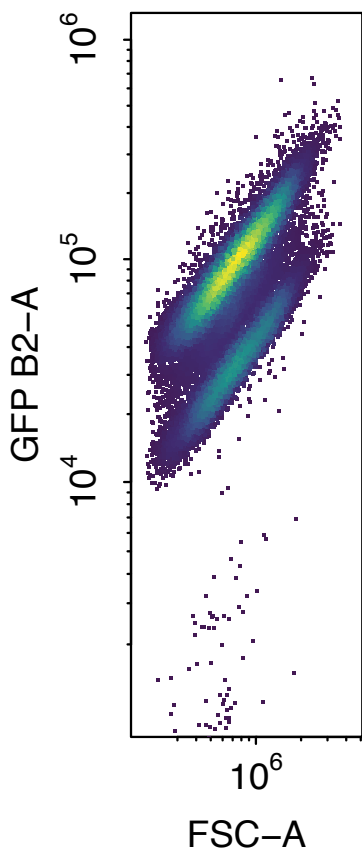

Generation 137

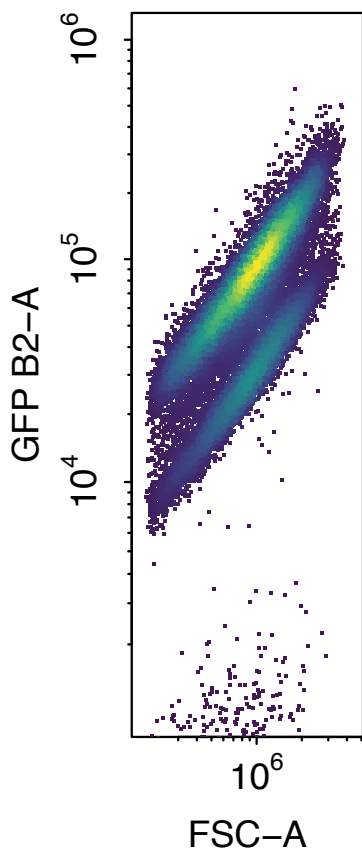

Key

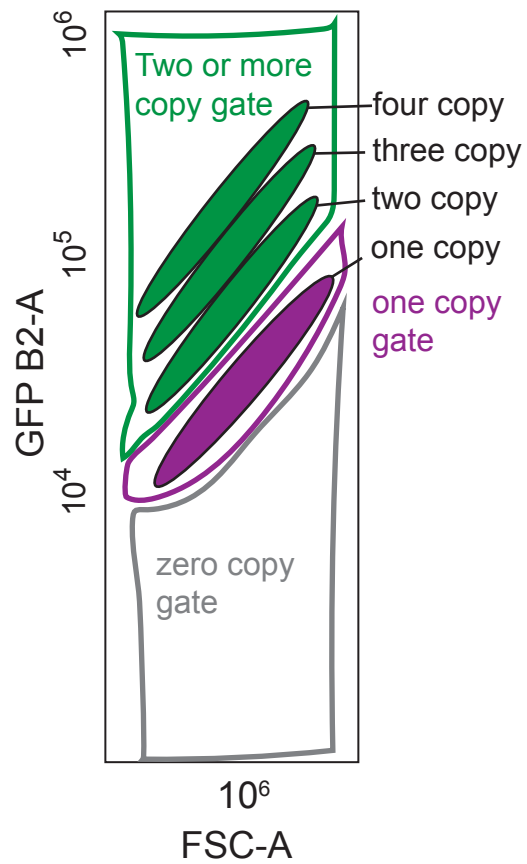

# Wildtype population 3

Generation 0

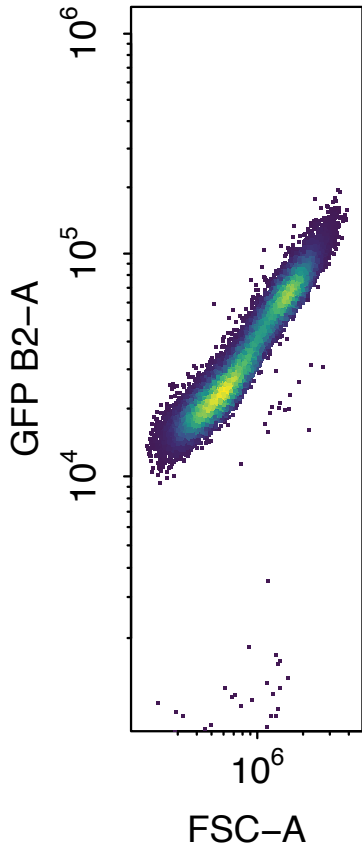

Generation 8

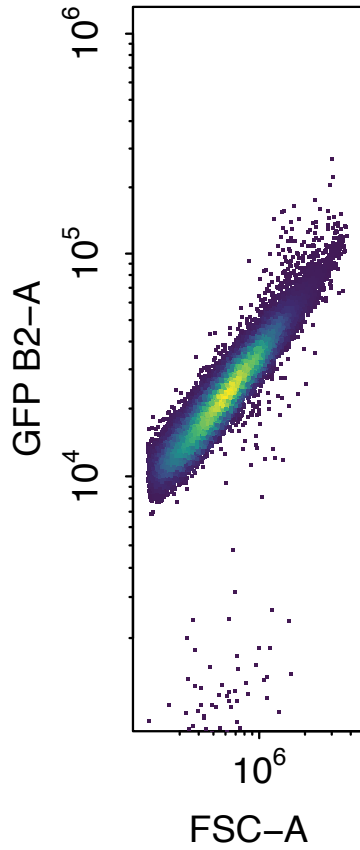

Generation 21

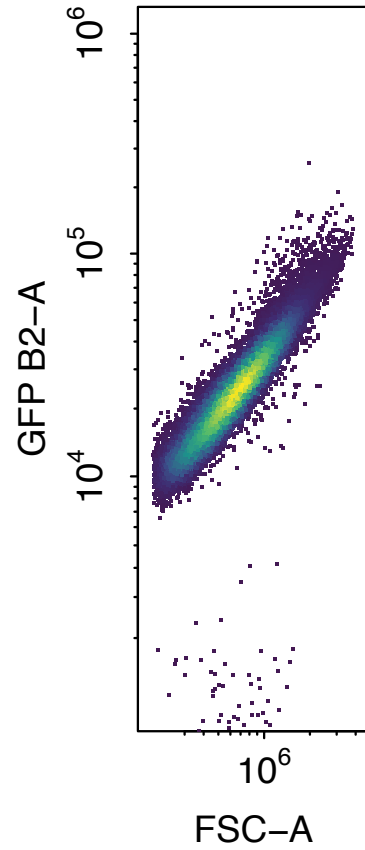

Generation 29

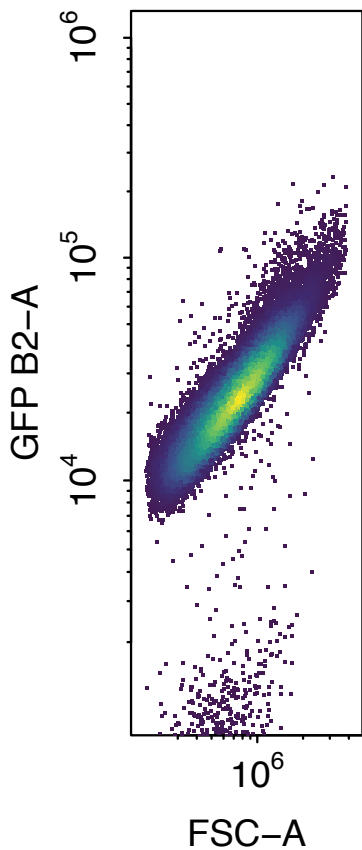

Generation 37

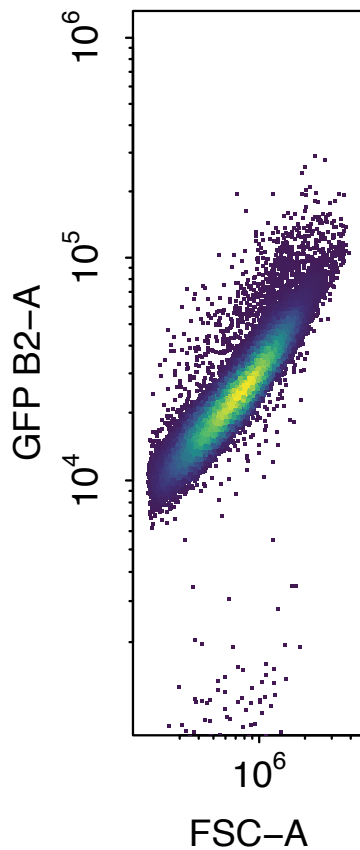

Key

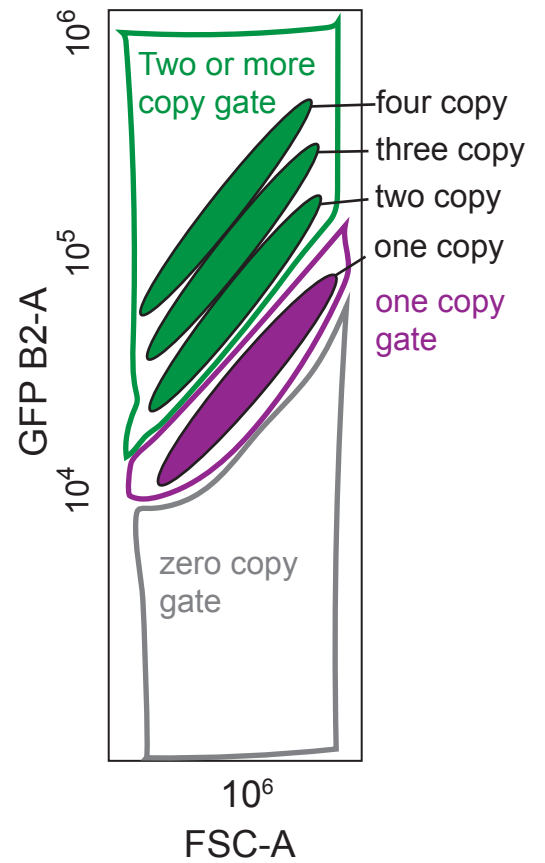

# Wildtype population 3

Generation 50

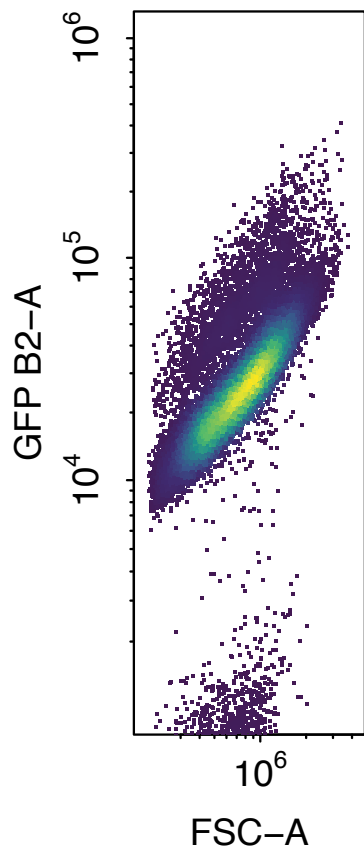

Generation 58

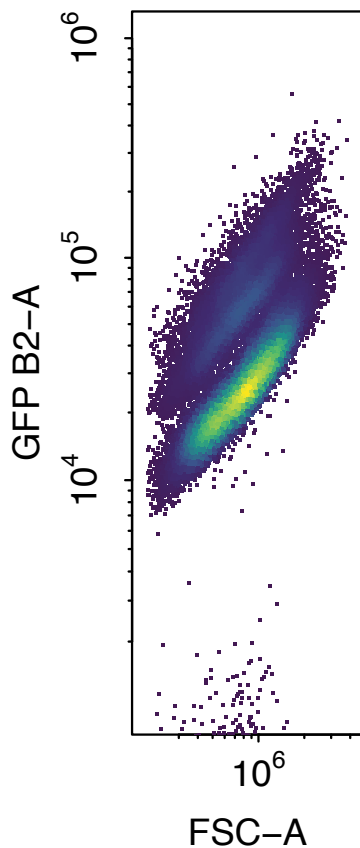

Generation 66

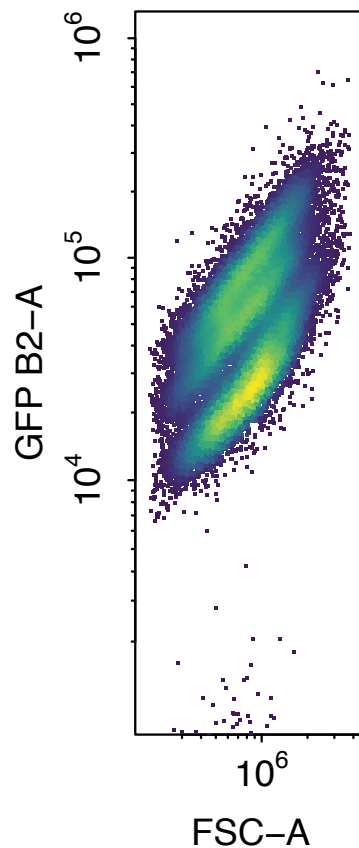

Generation 79

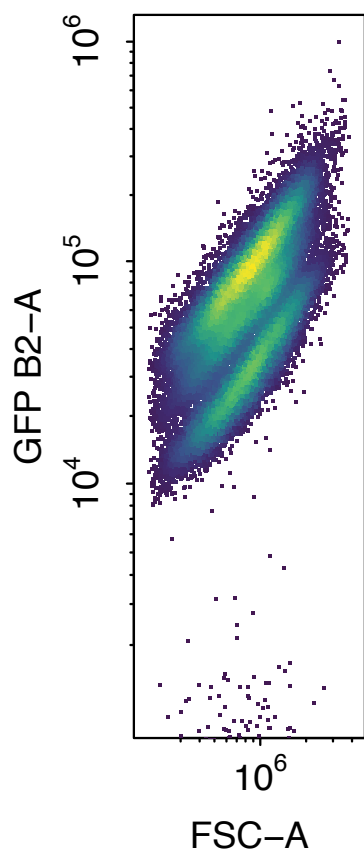

Generation 87

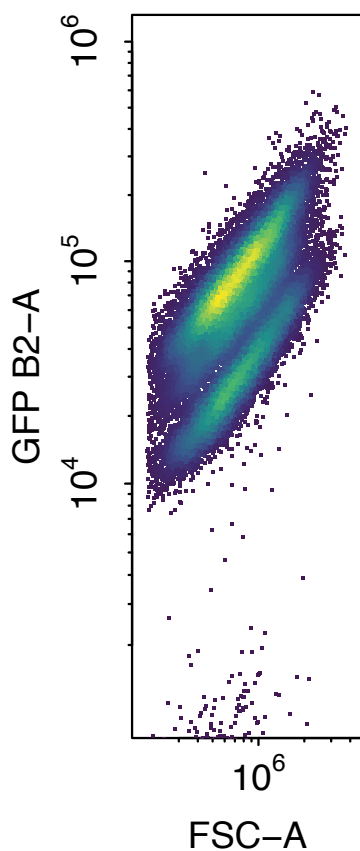

Key

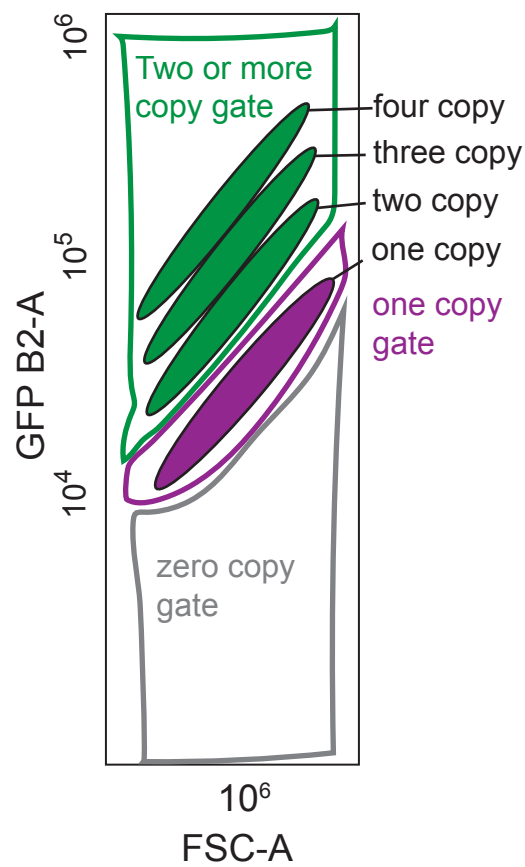



# Wildtype population 3

Generation 95

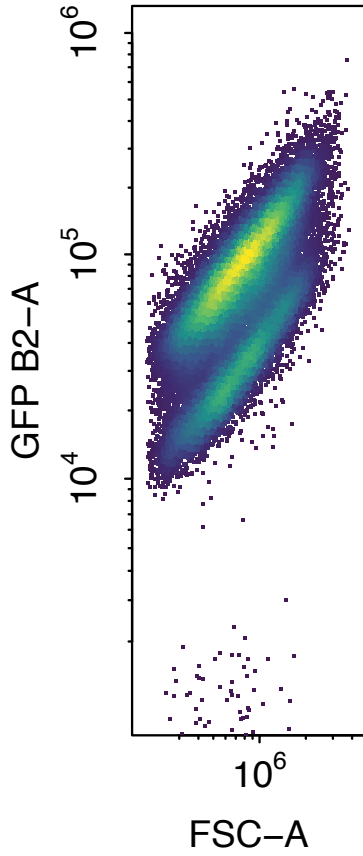

Generation 108

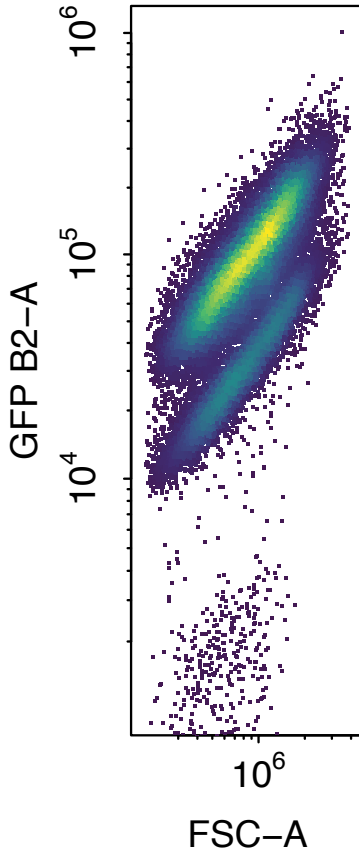

Generation 116

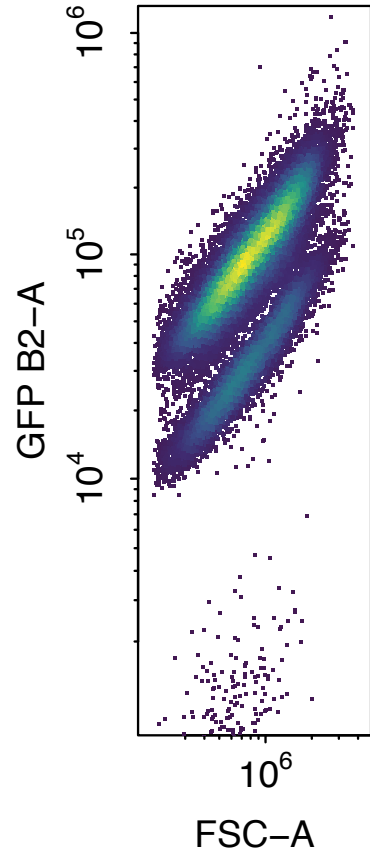

Generation 124

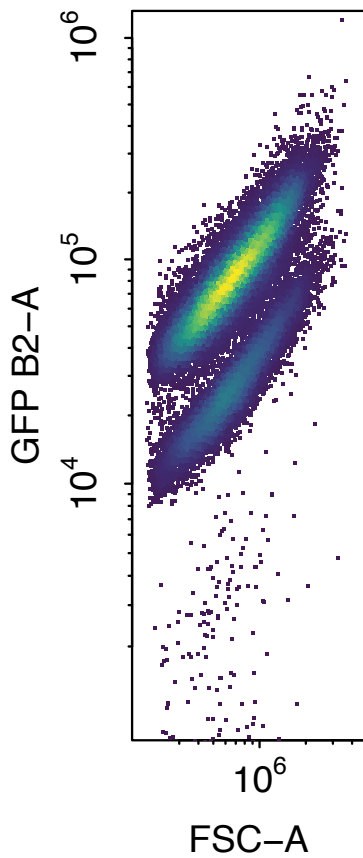

Generation 137

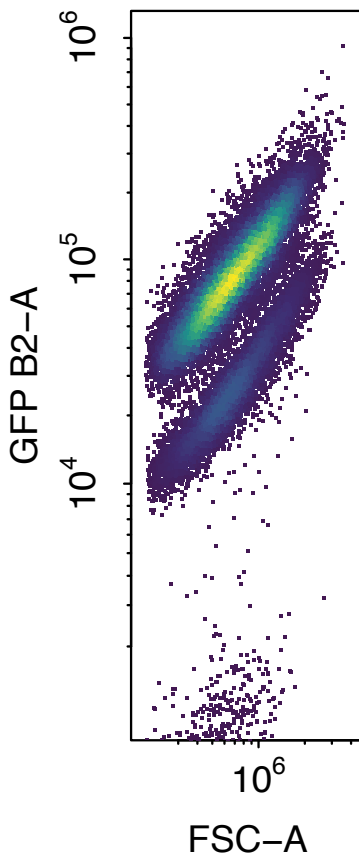

Key

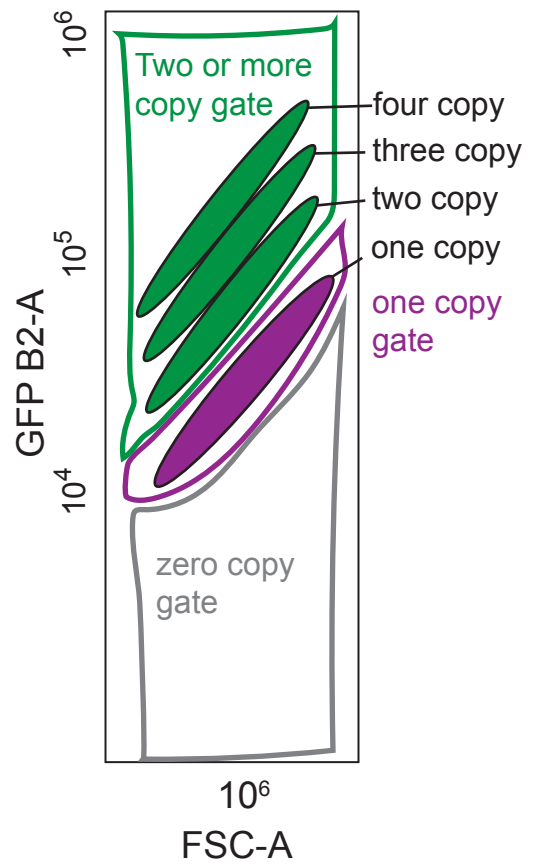

# Wildtype population 4

Generation 0

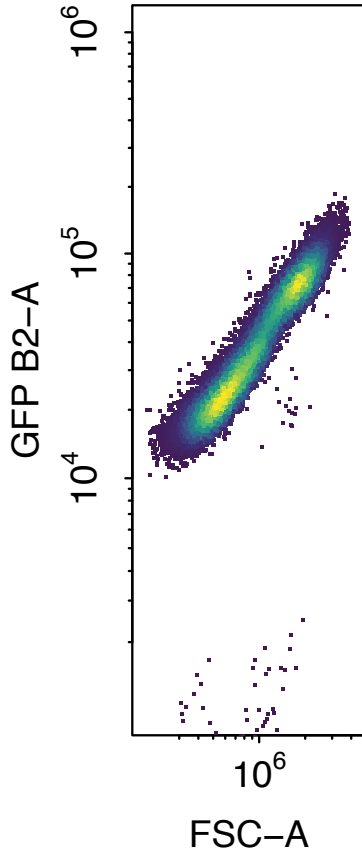

Generation 8

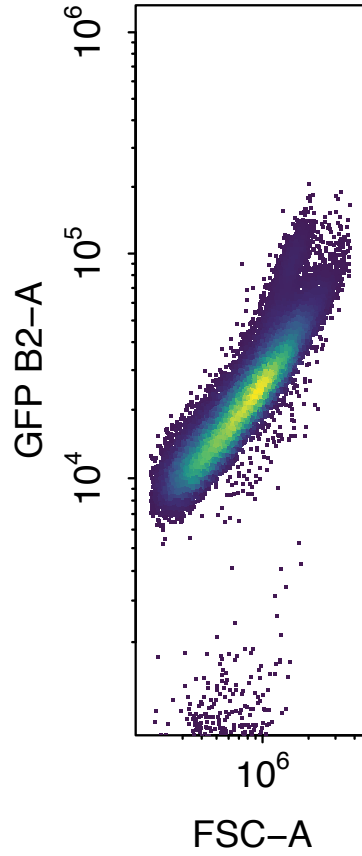

Generation 21

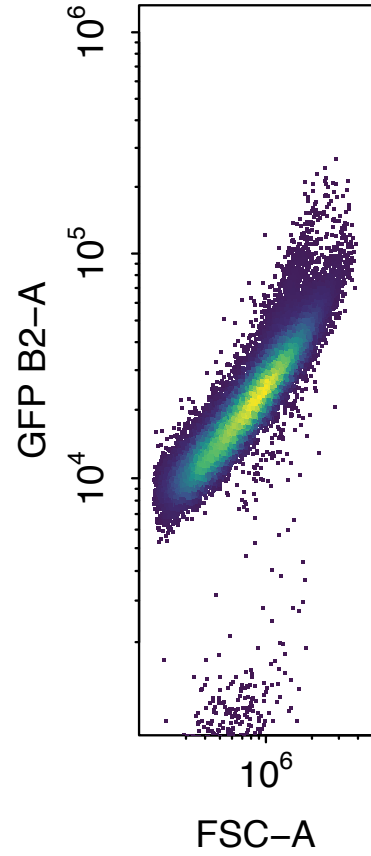

Generation 29

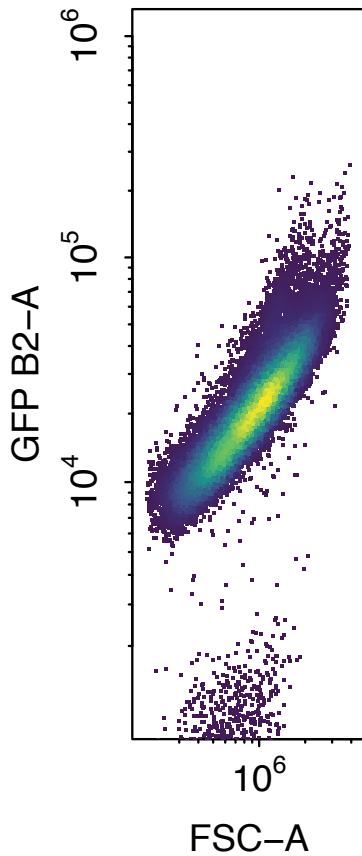

Generation 37

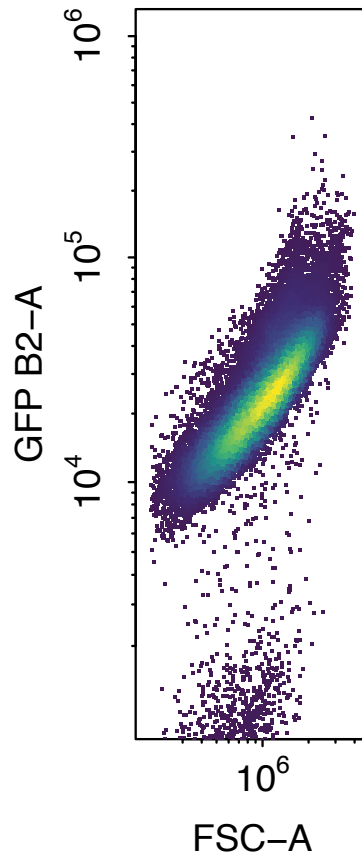

Key

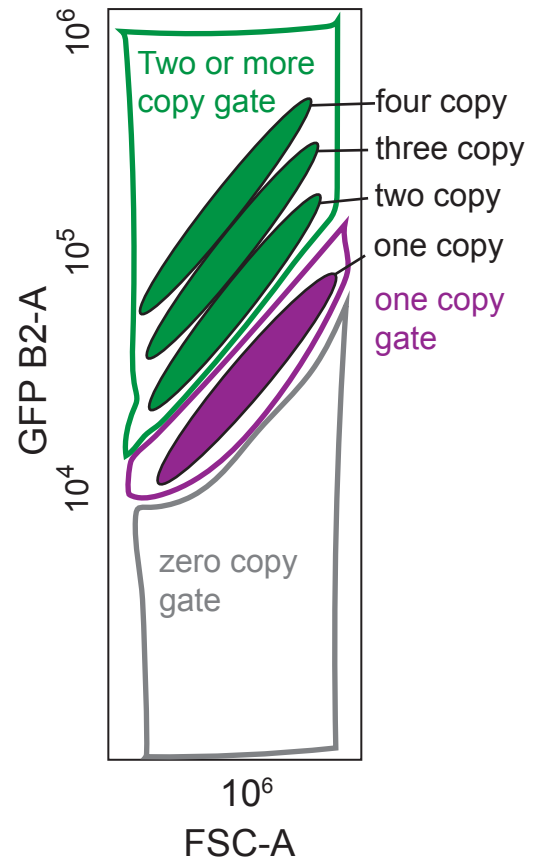

# Wildtype population 4

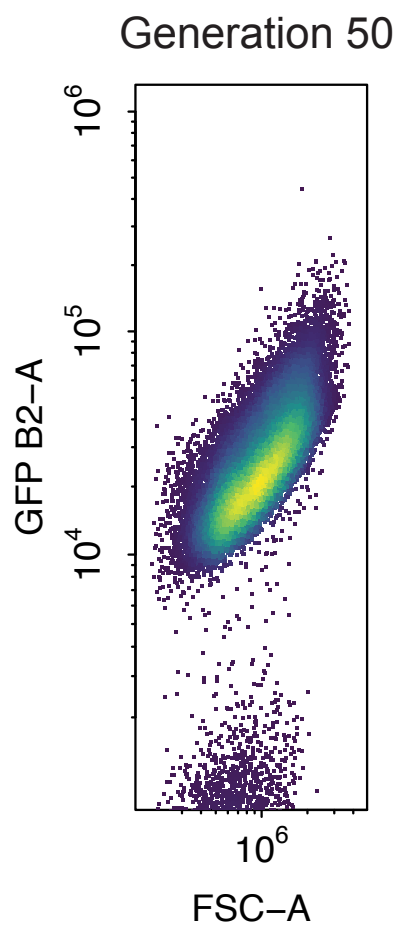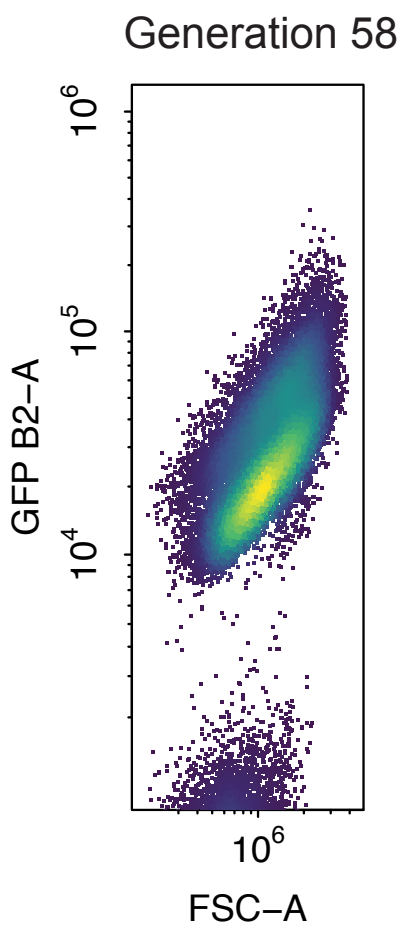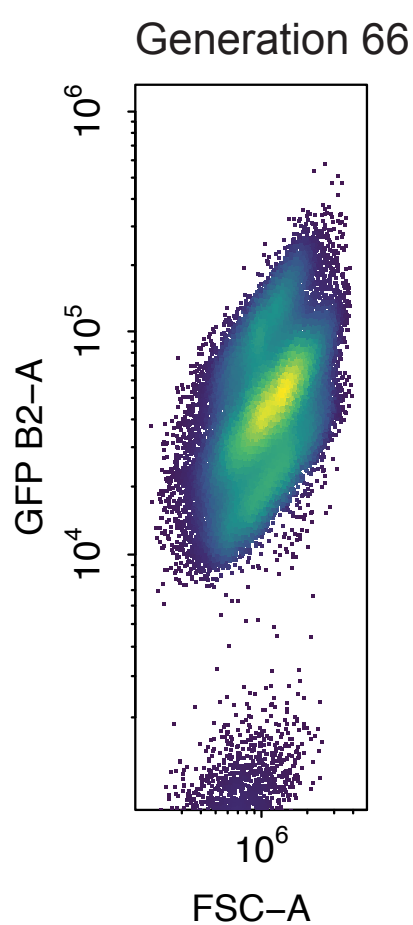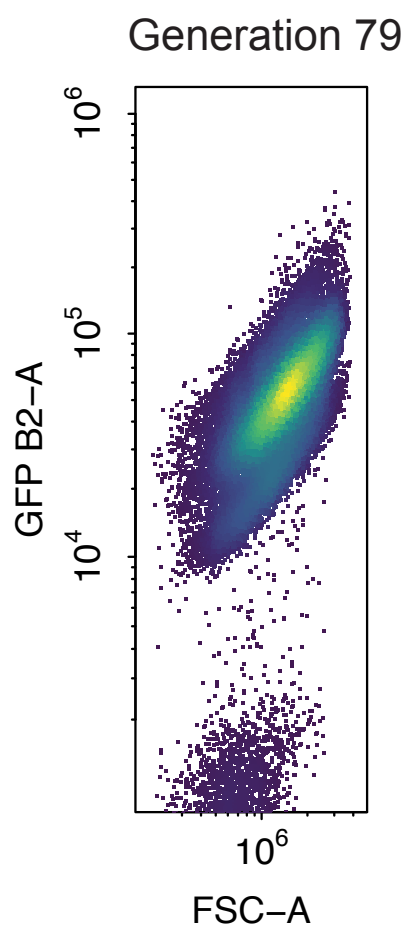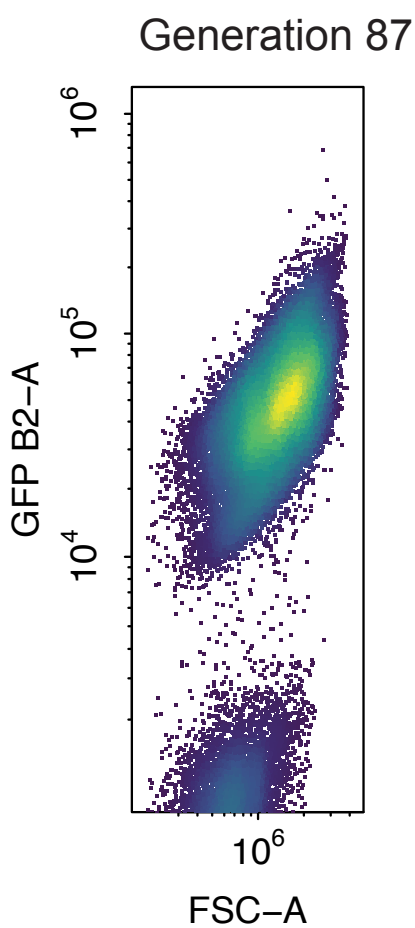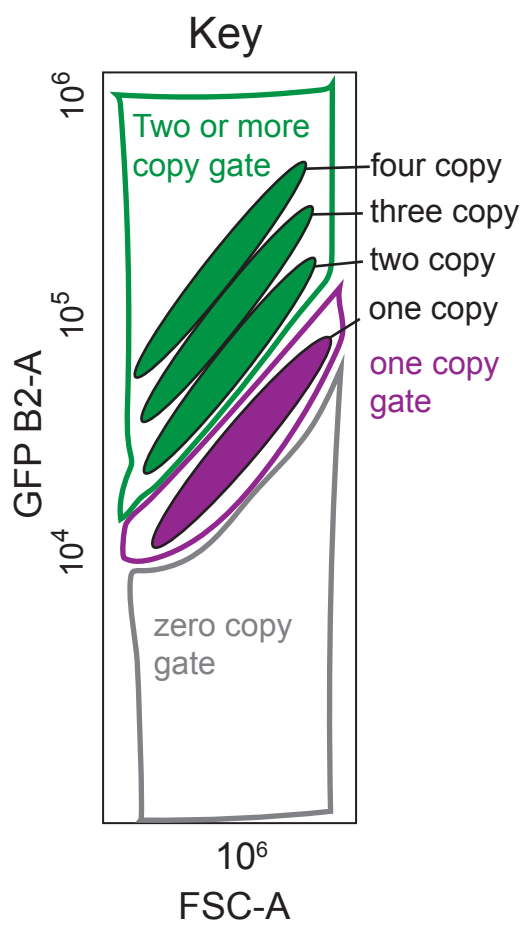

# Wildtype population 4

Generation 95

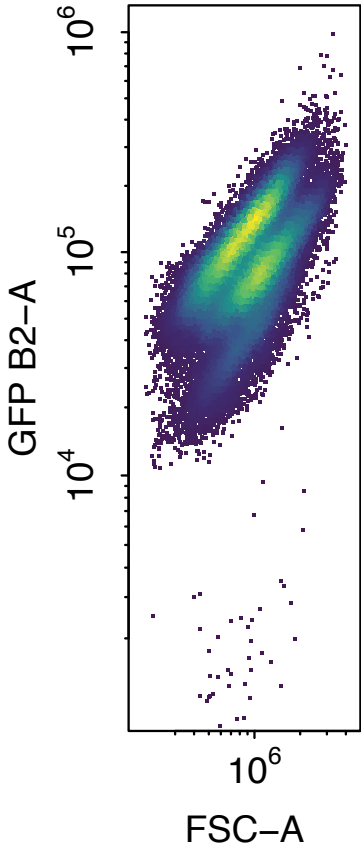

Generation 108

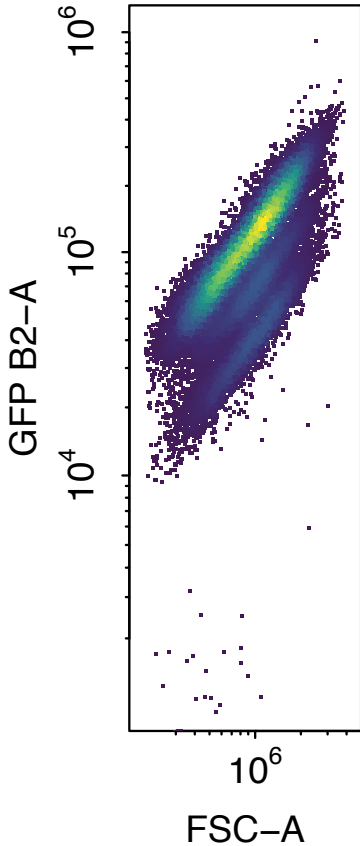

Generation 116

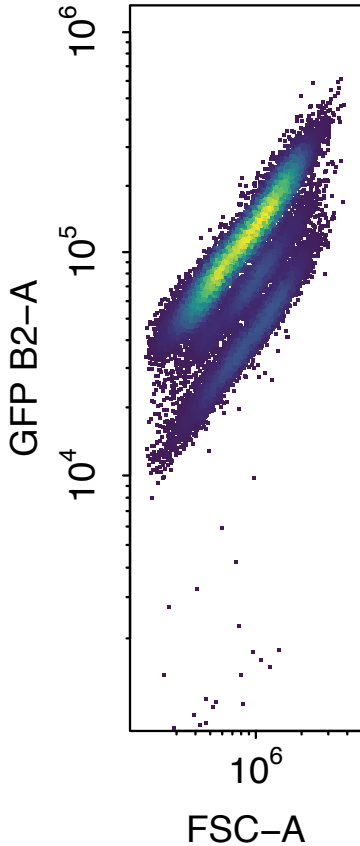

Generation 124

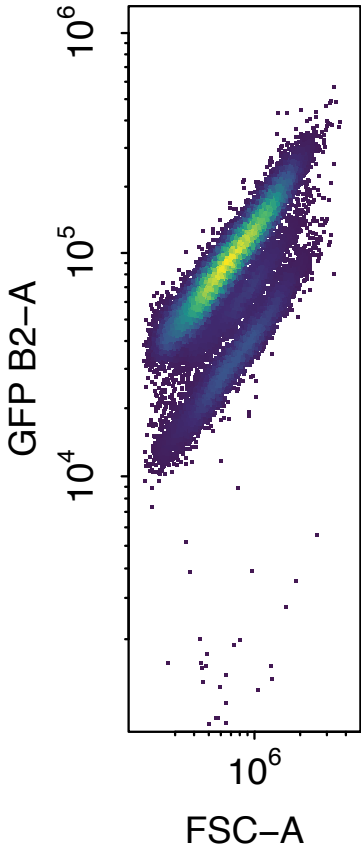

Generation 137

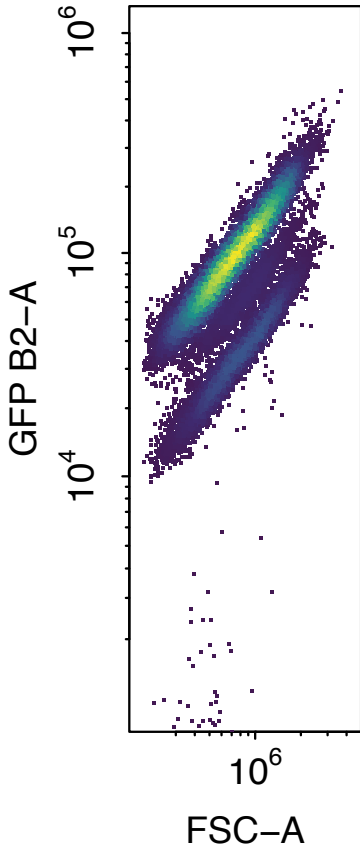

Key

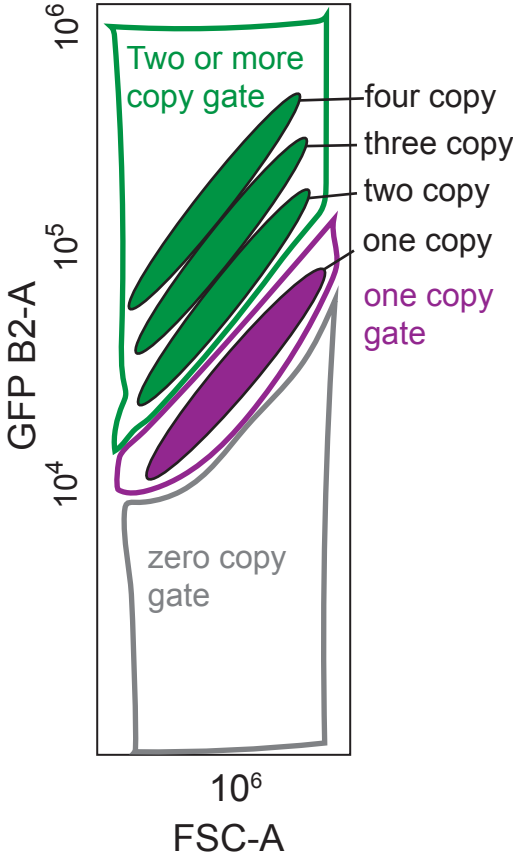

# Wildtype population 5

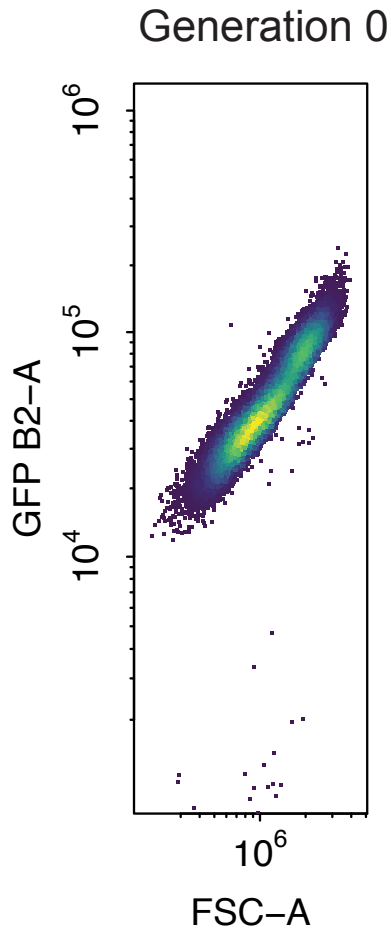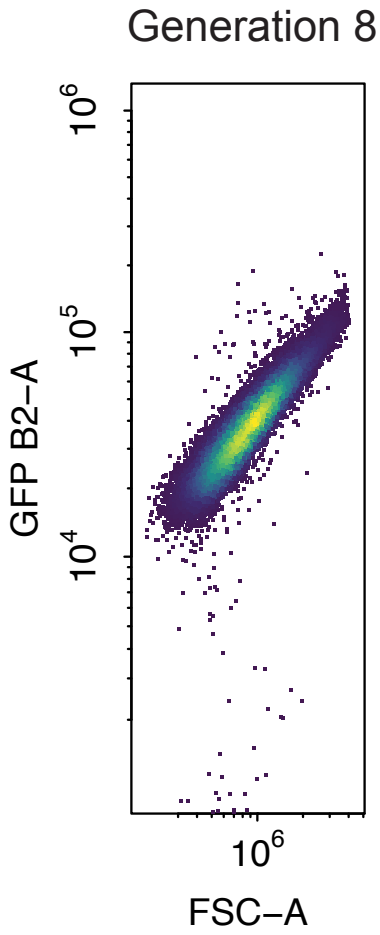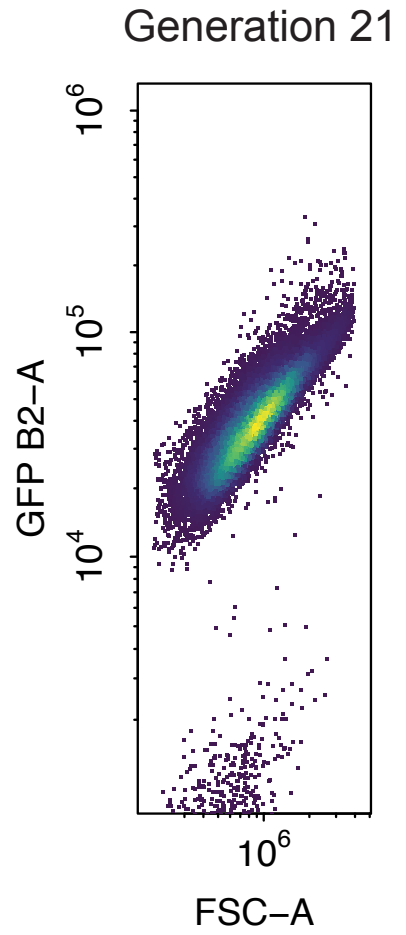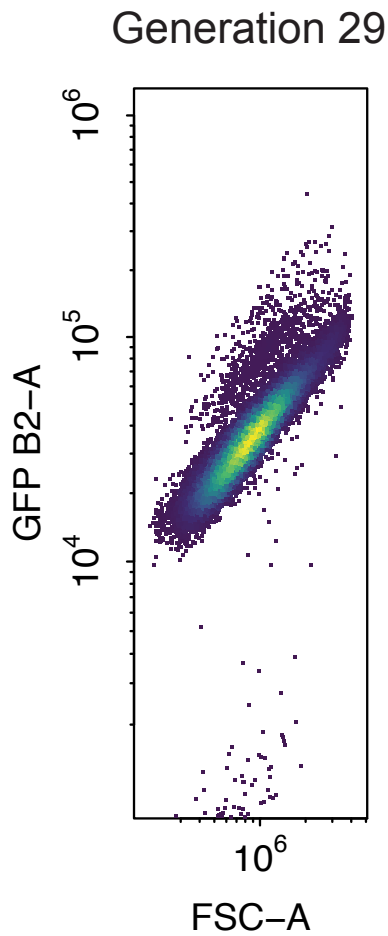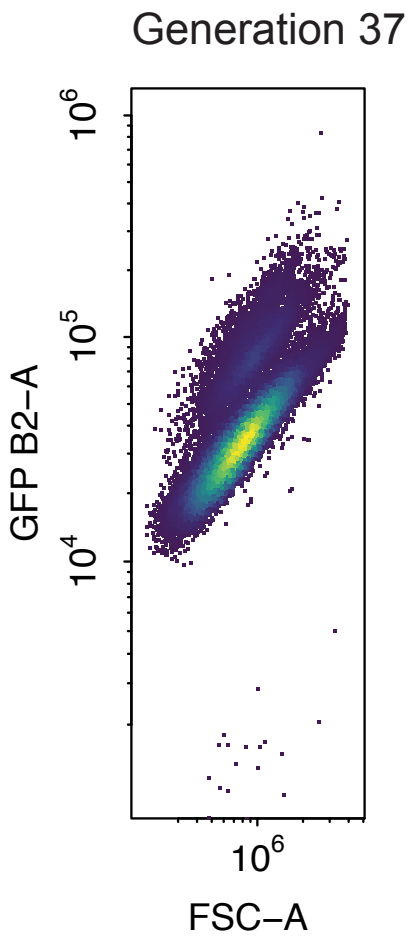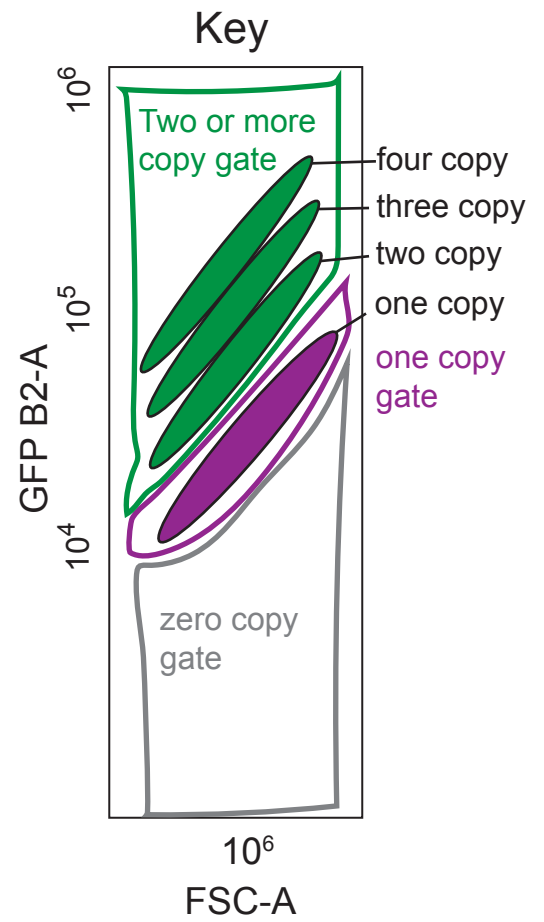

# Wildtype population 5

Generation 50

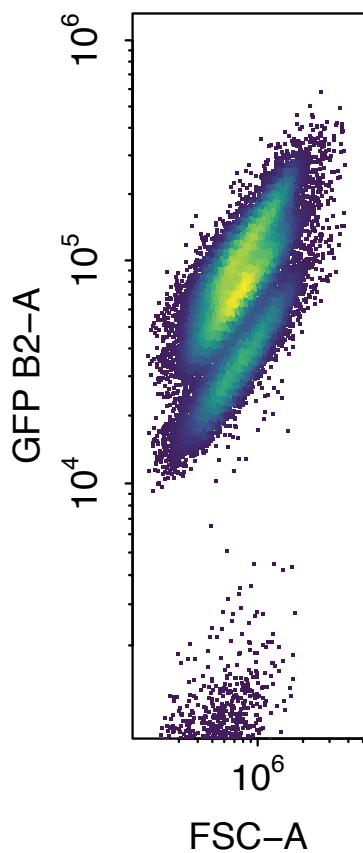

Generation 58

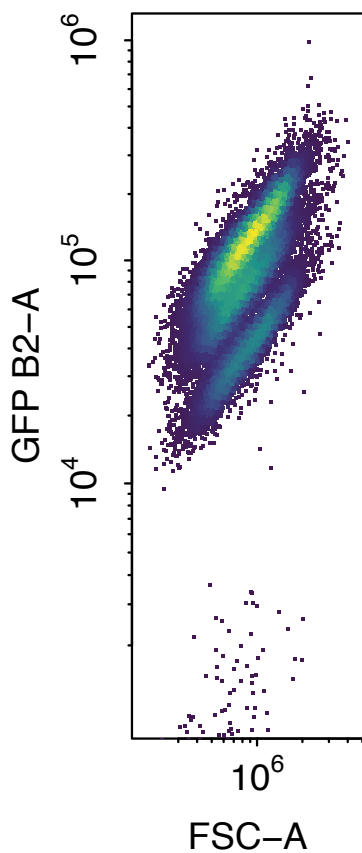

Generation 66

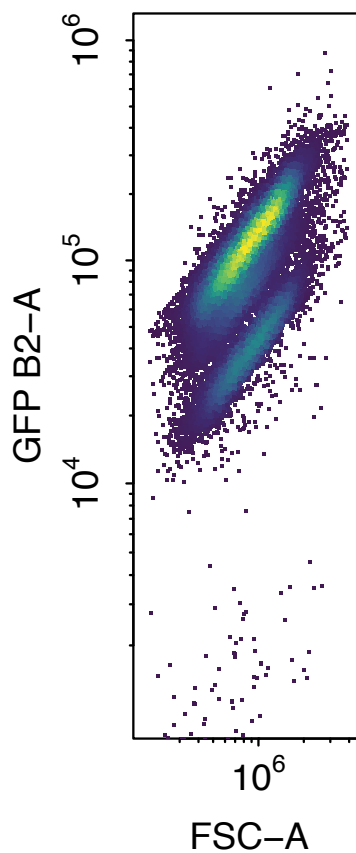

Generation 79

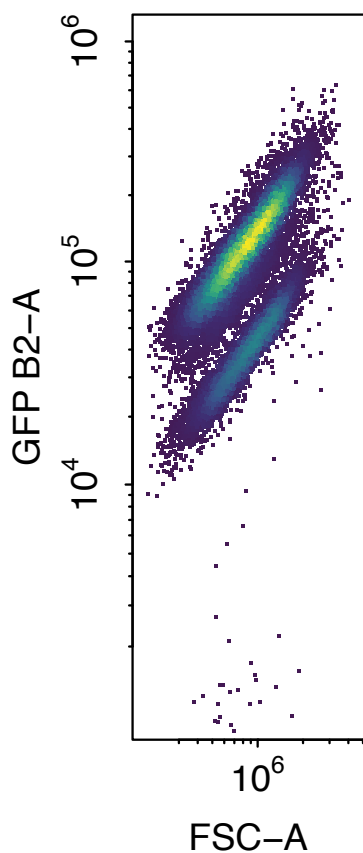

Generation 87

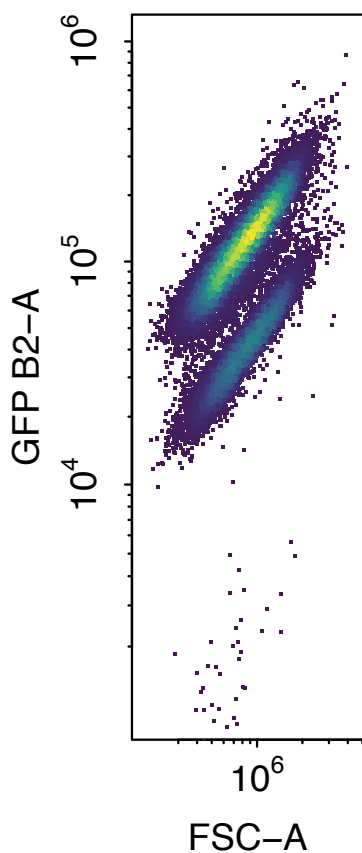

Key

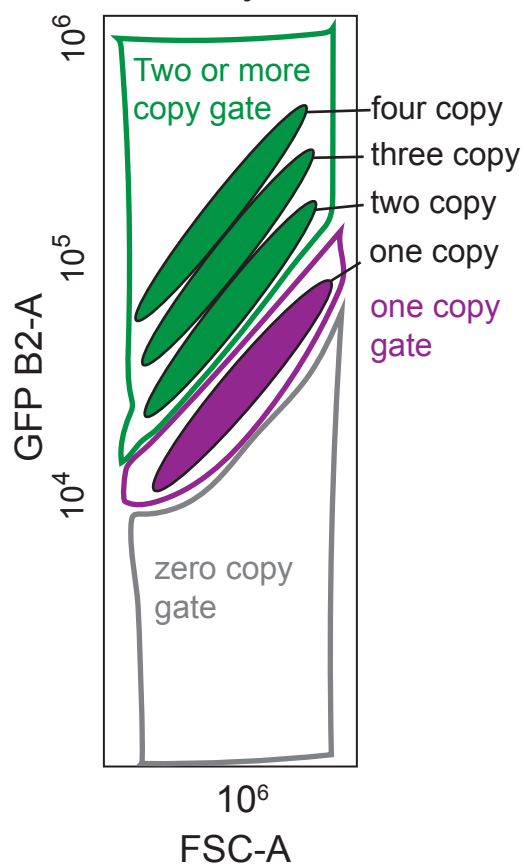

# Wildtype population 5

Generation 95

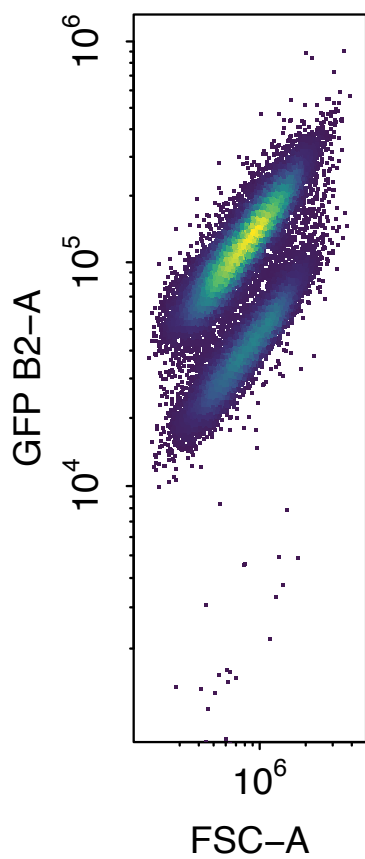

Generation 108

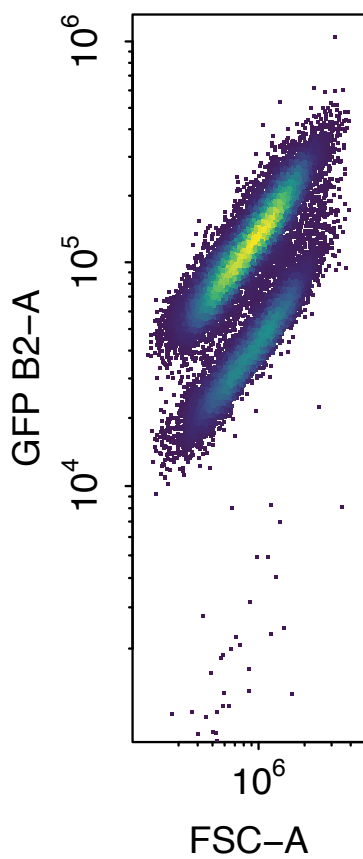

Generation 116

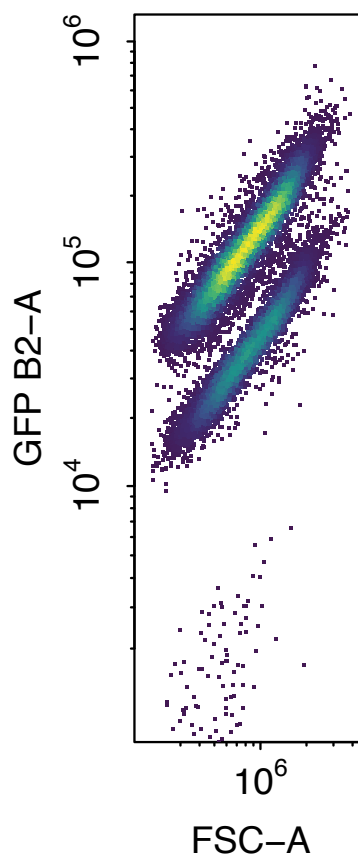

Generation 124

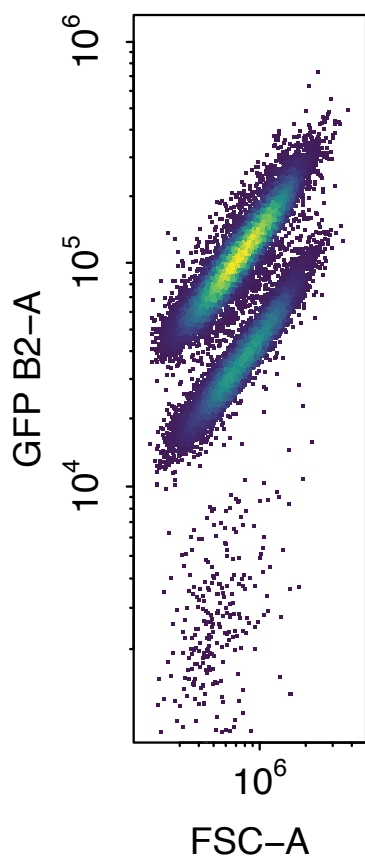

Generation 137

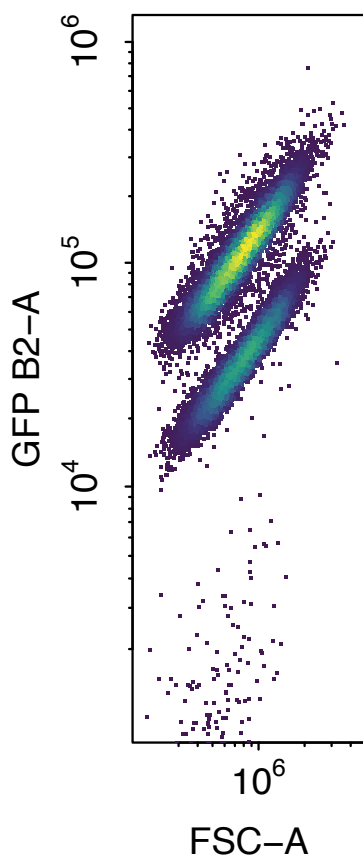

Key

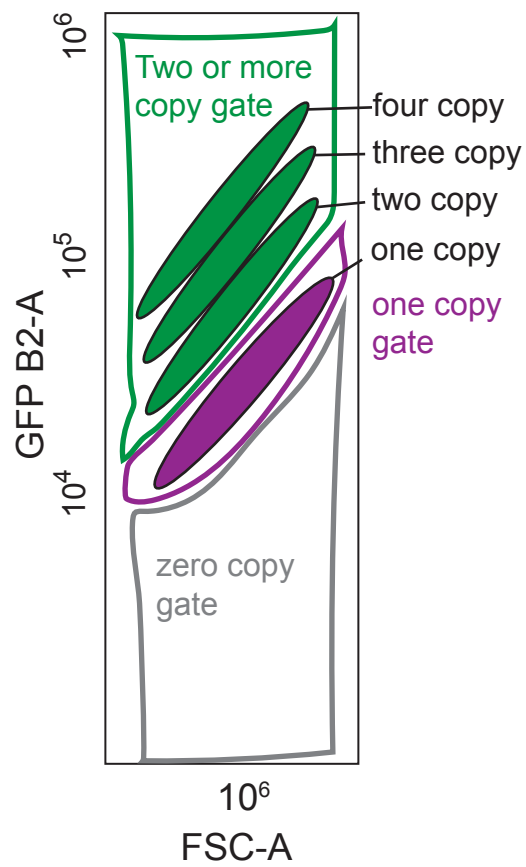

# LTR $\Delta$ population 1

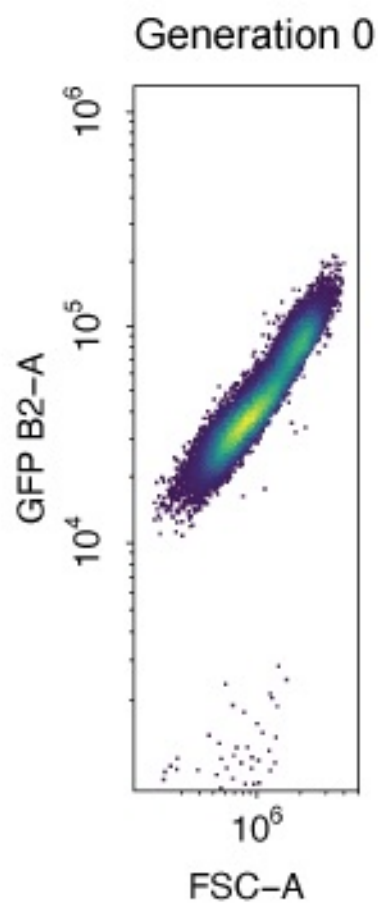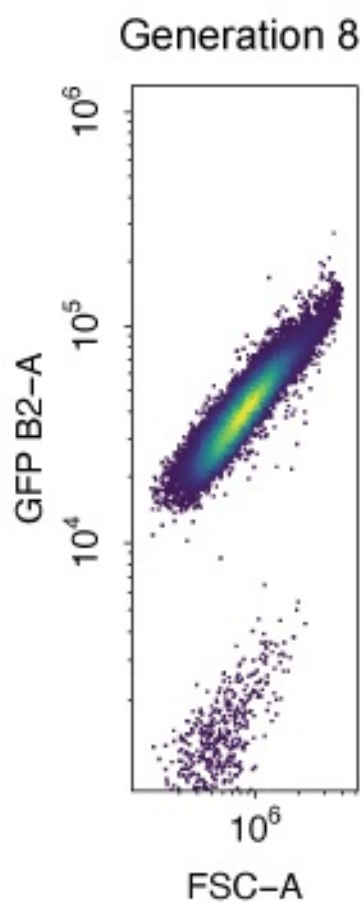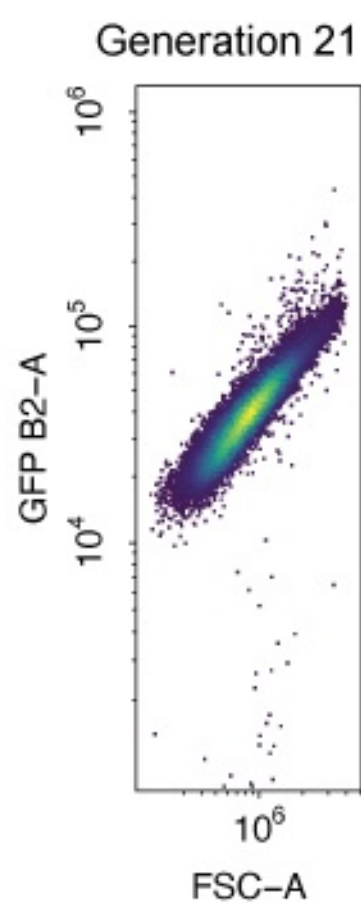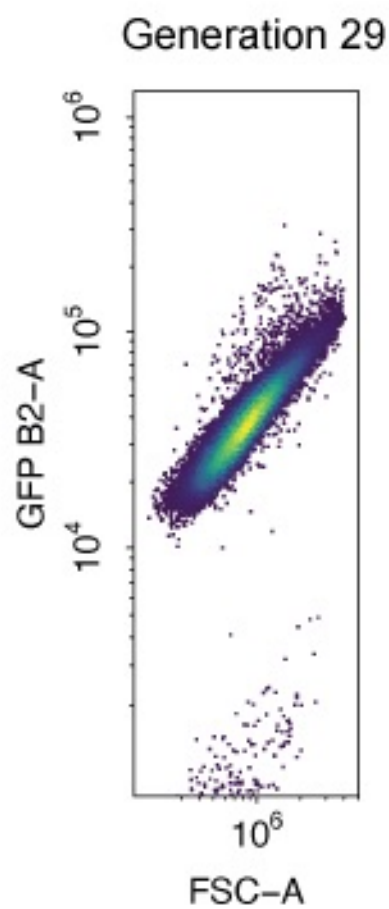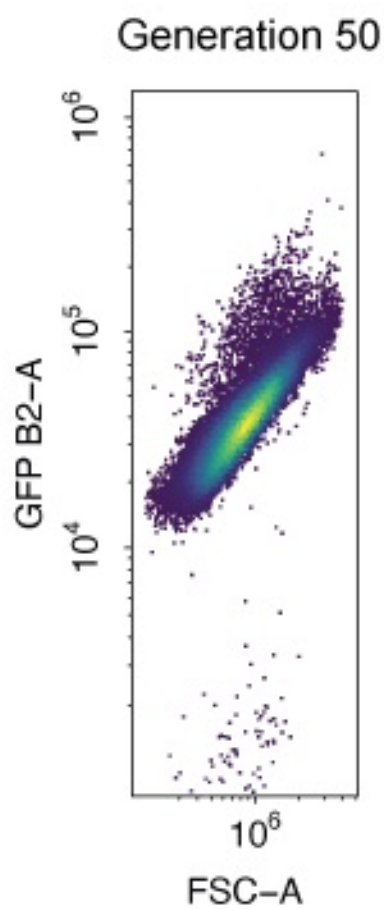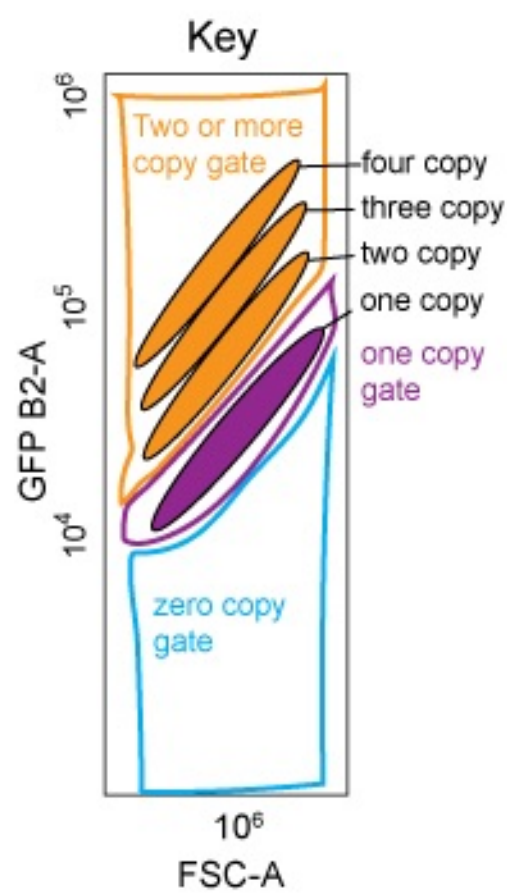



# LTR $\Delta$ population 1

Generation 58

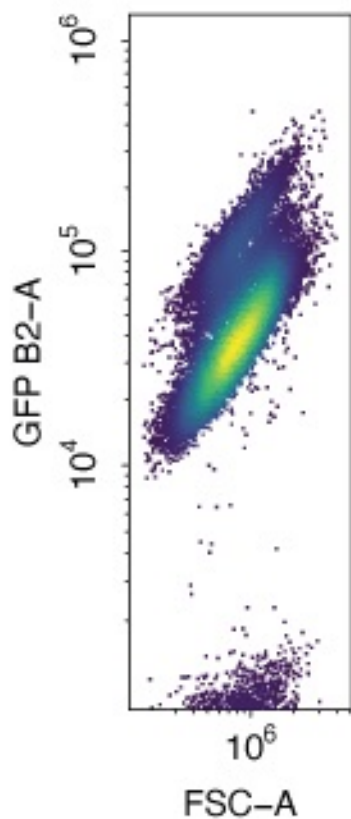

Generation 66

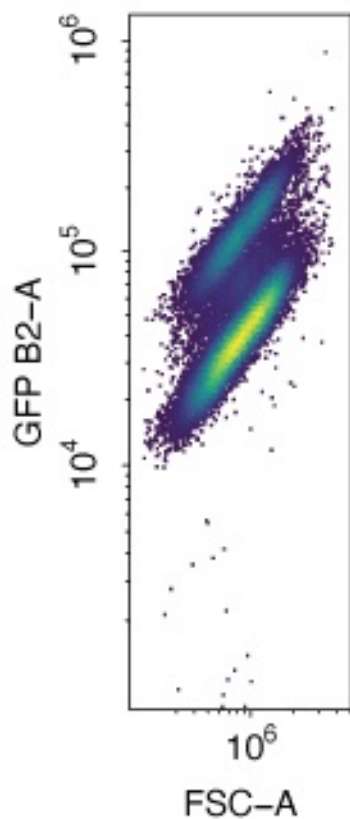

Generation 79

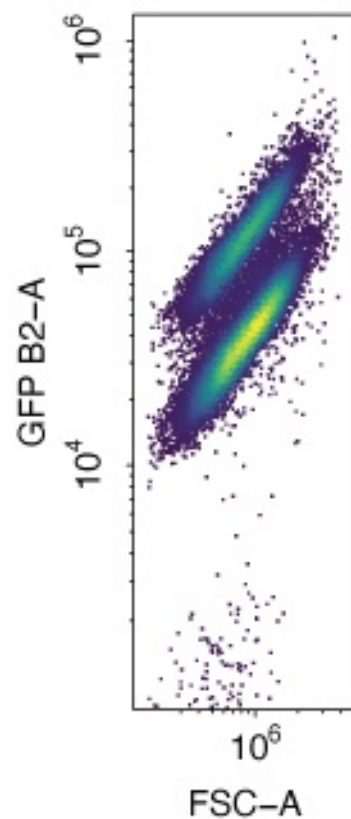

Generation 87

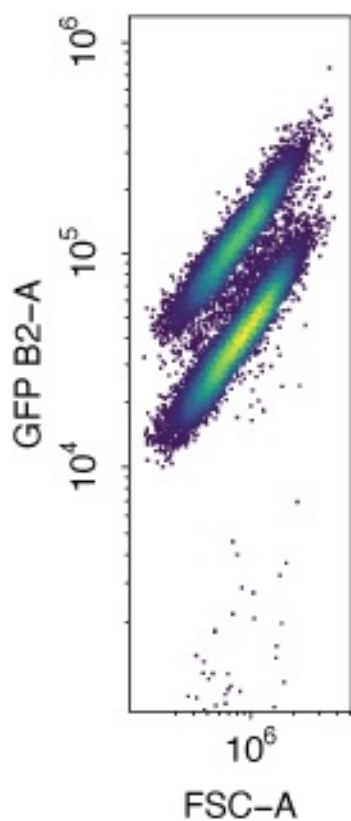

Generation 95

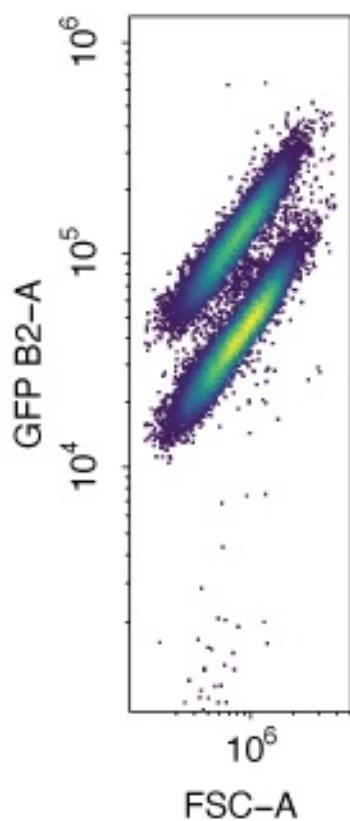

Key

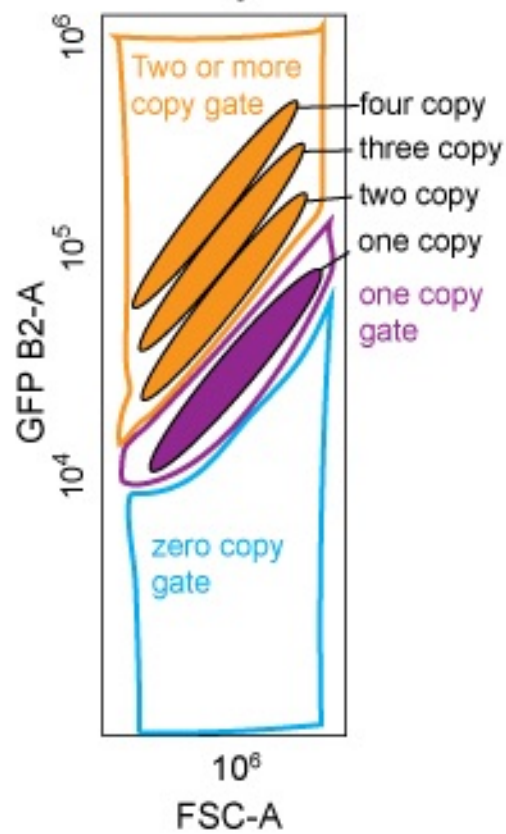

# LTR $\Delta$ population 1

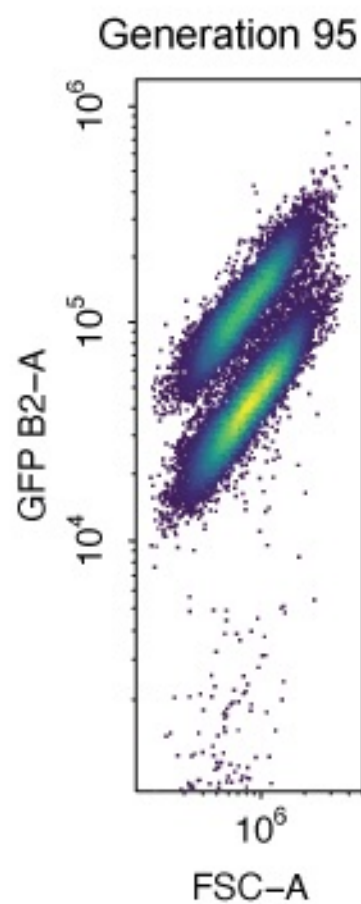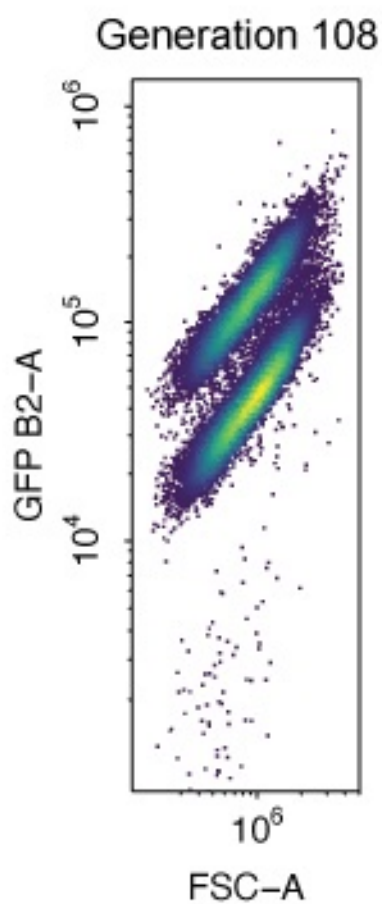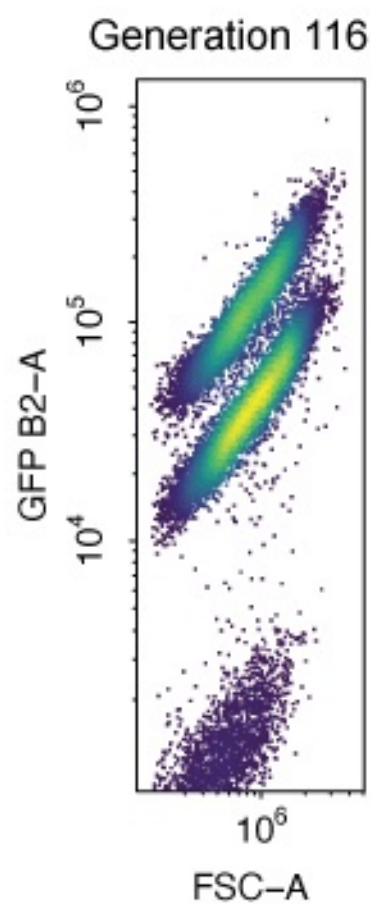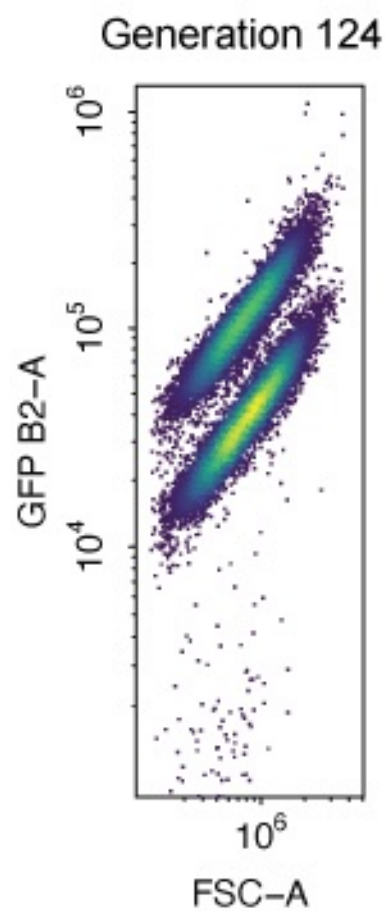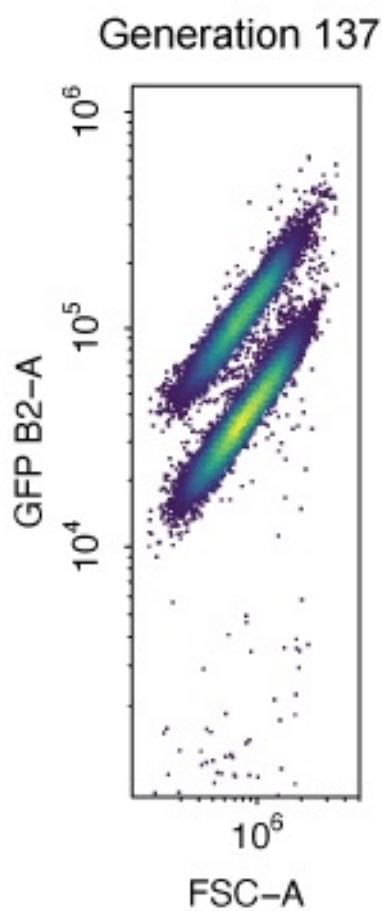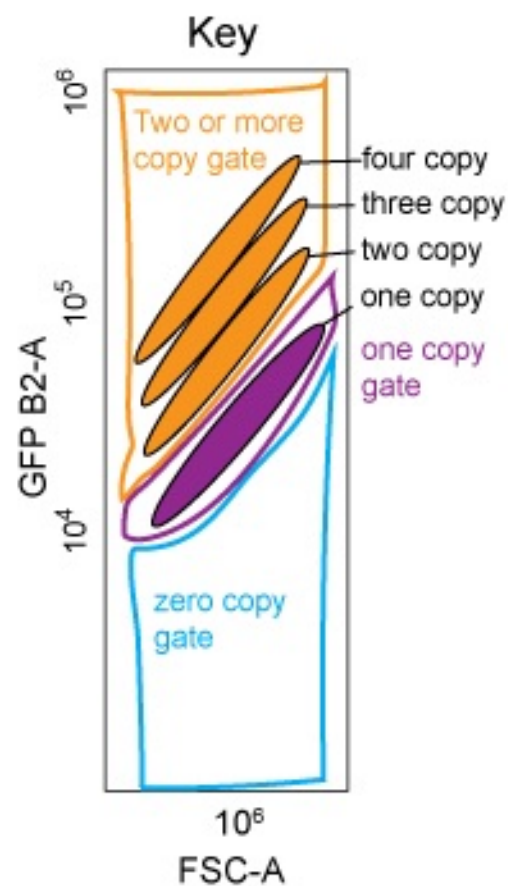

# LTR $\Delta$ population 3

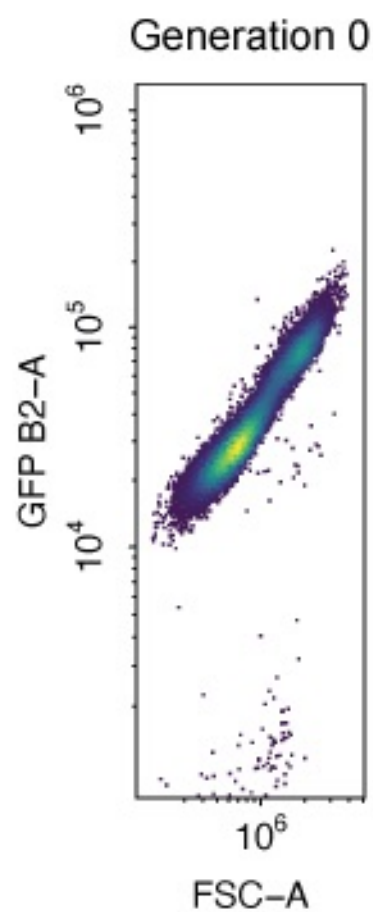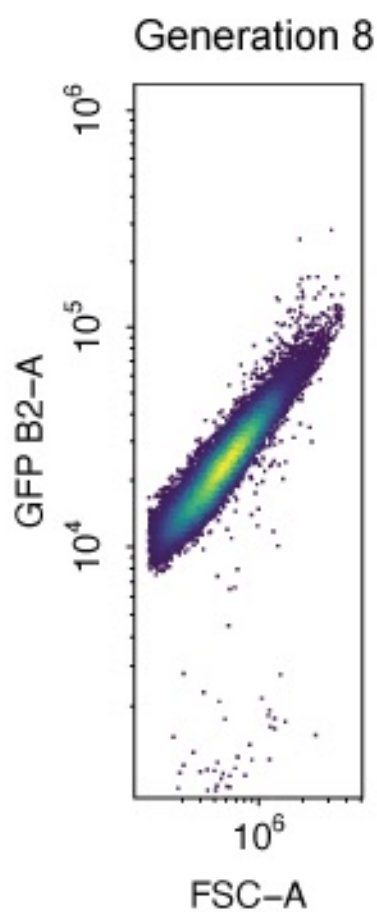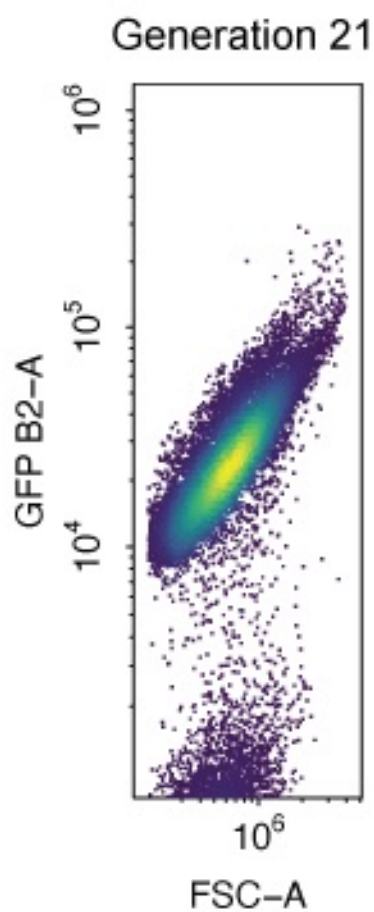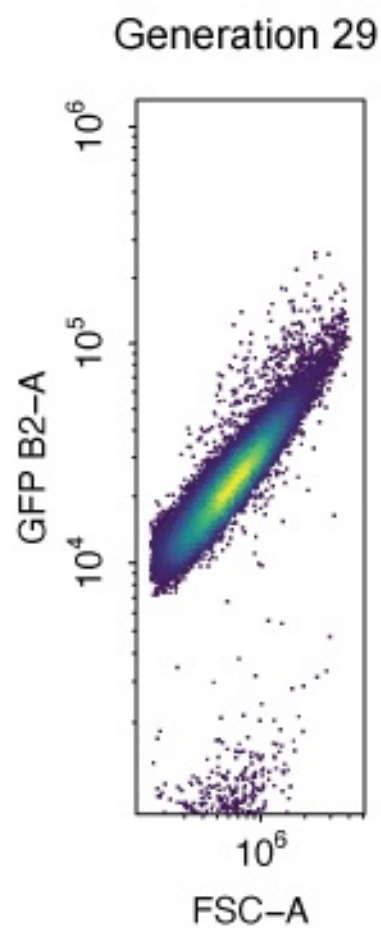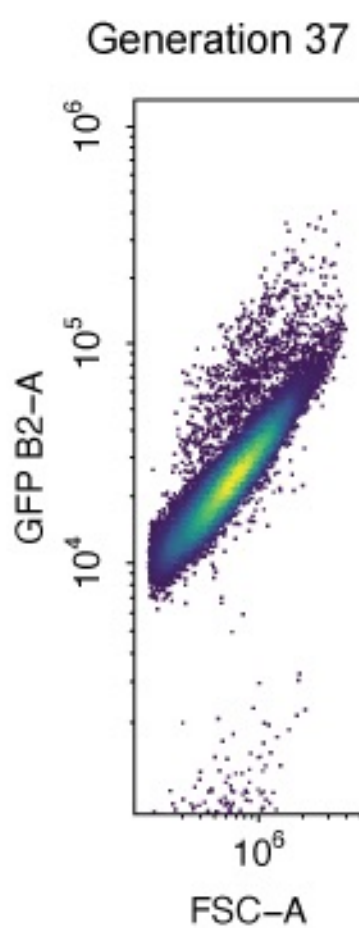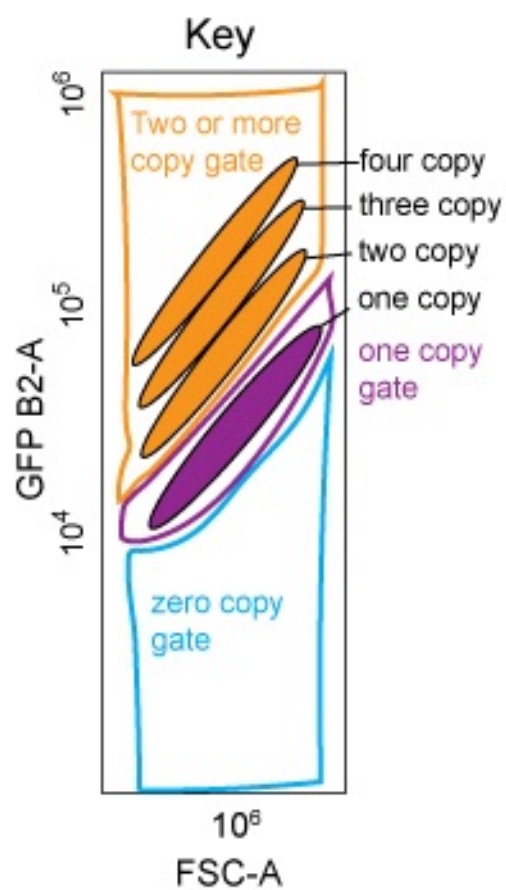

# LTR $\Delta$ population 3

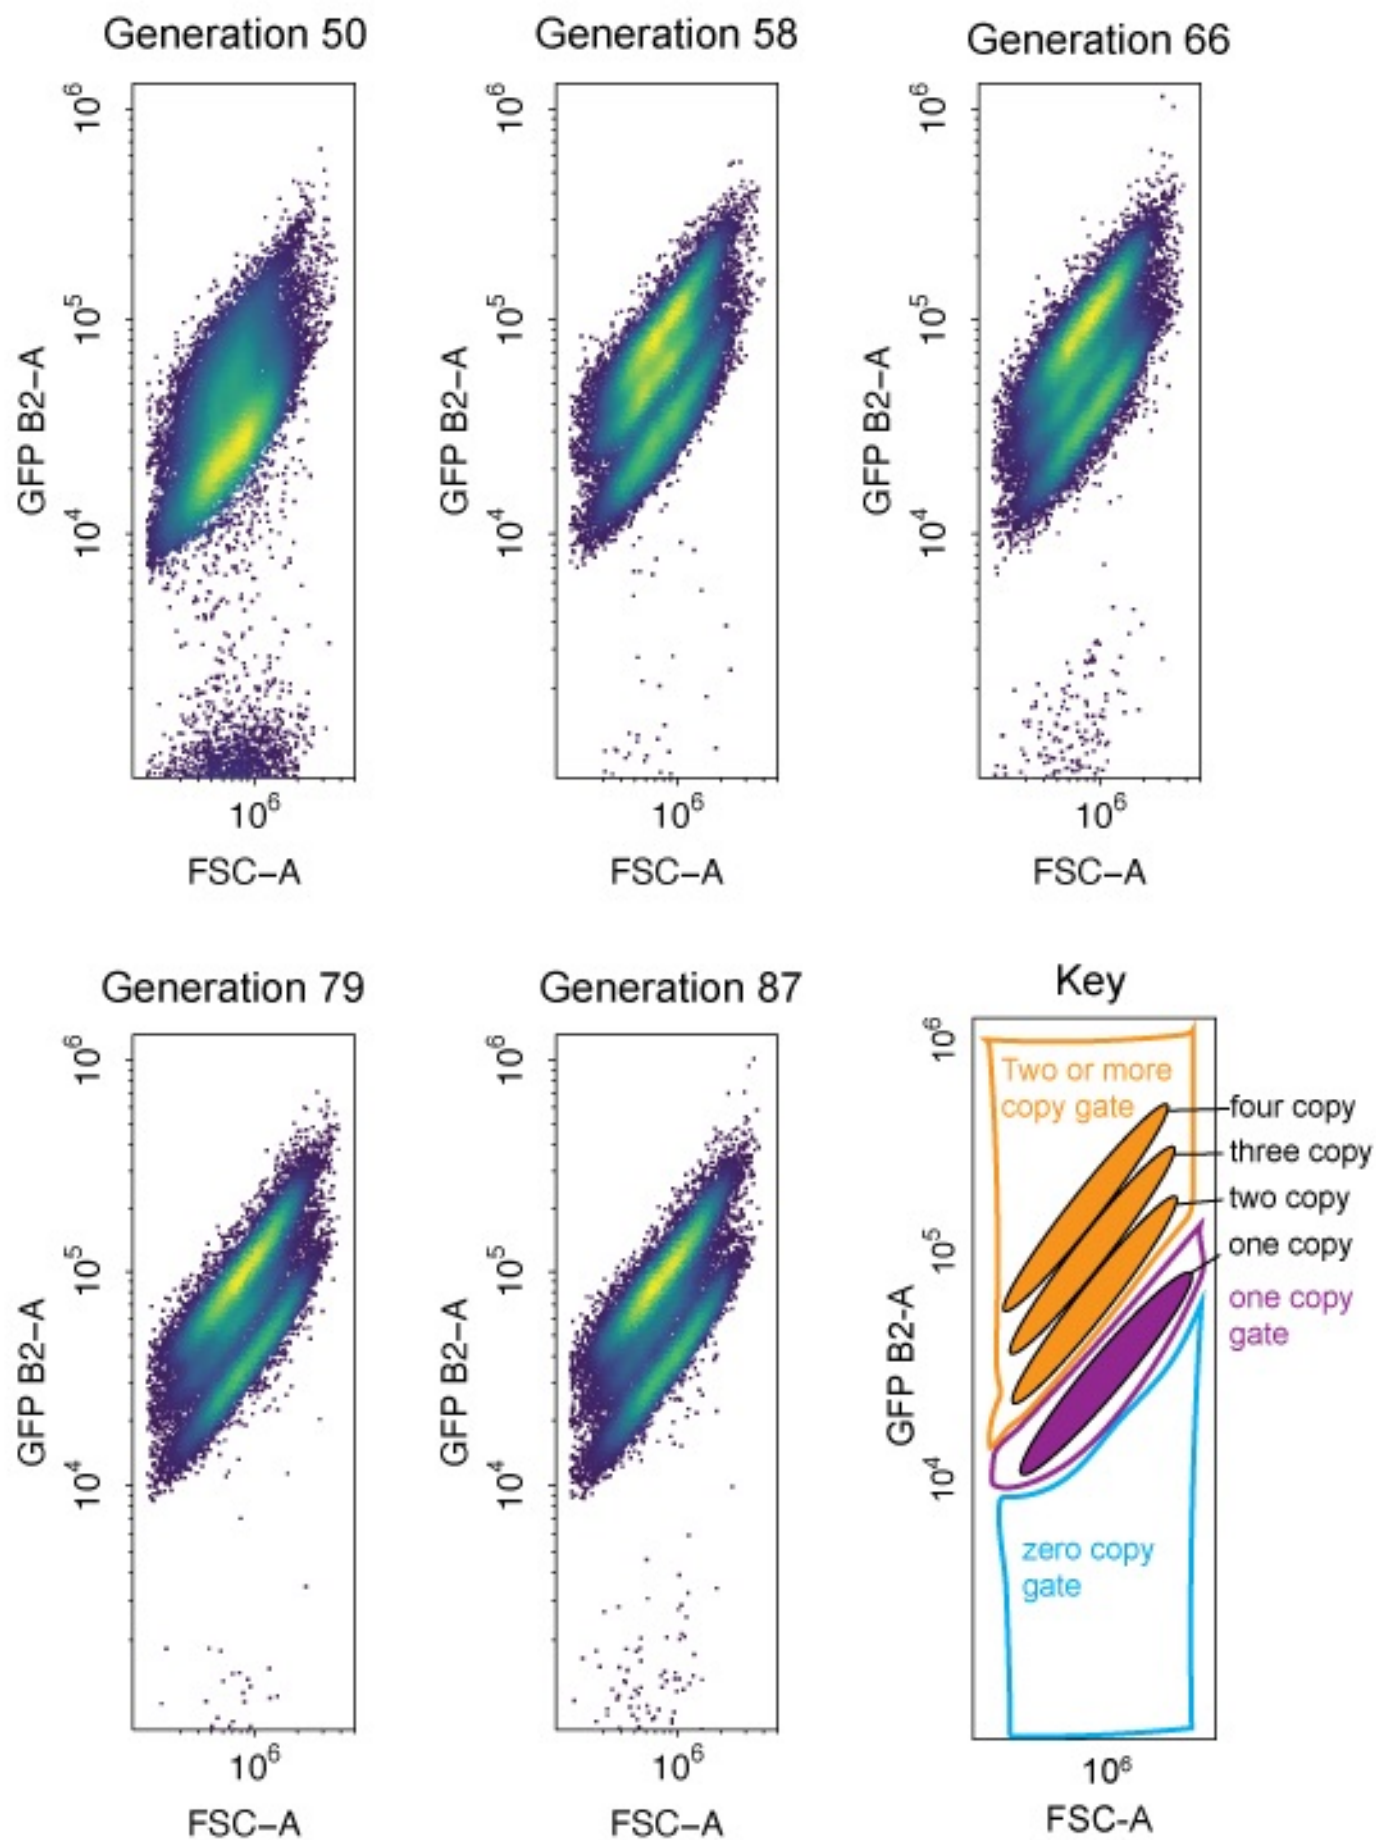

# LTR $\Delta$ population 3

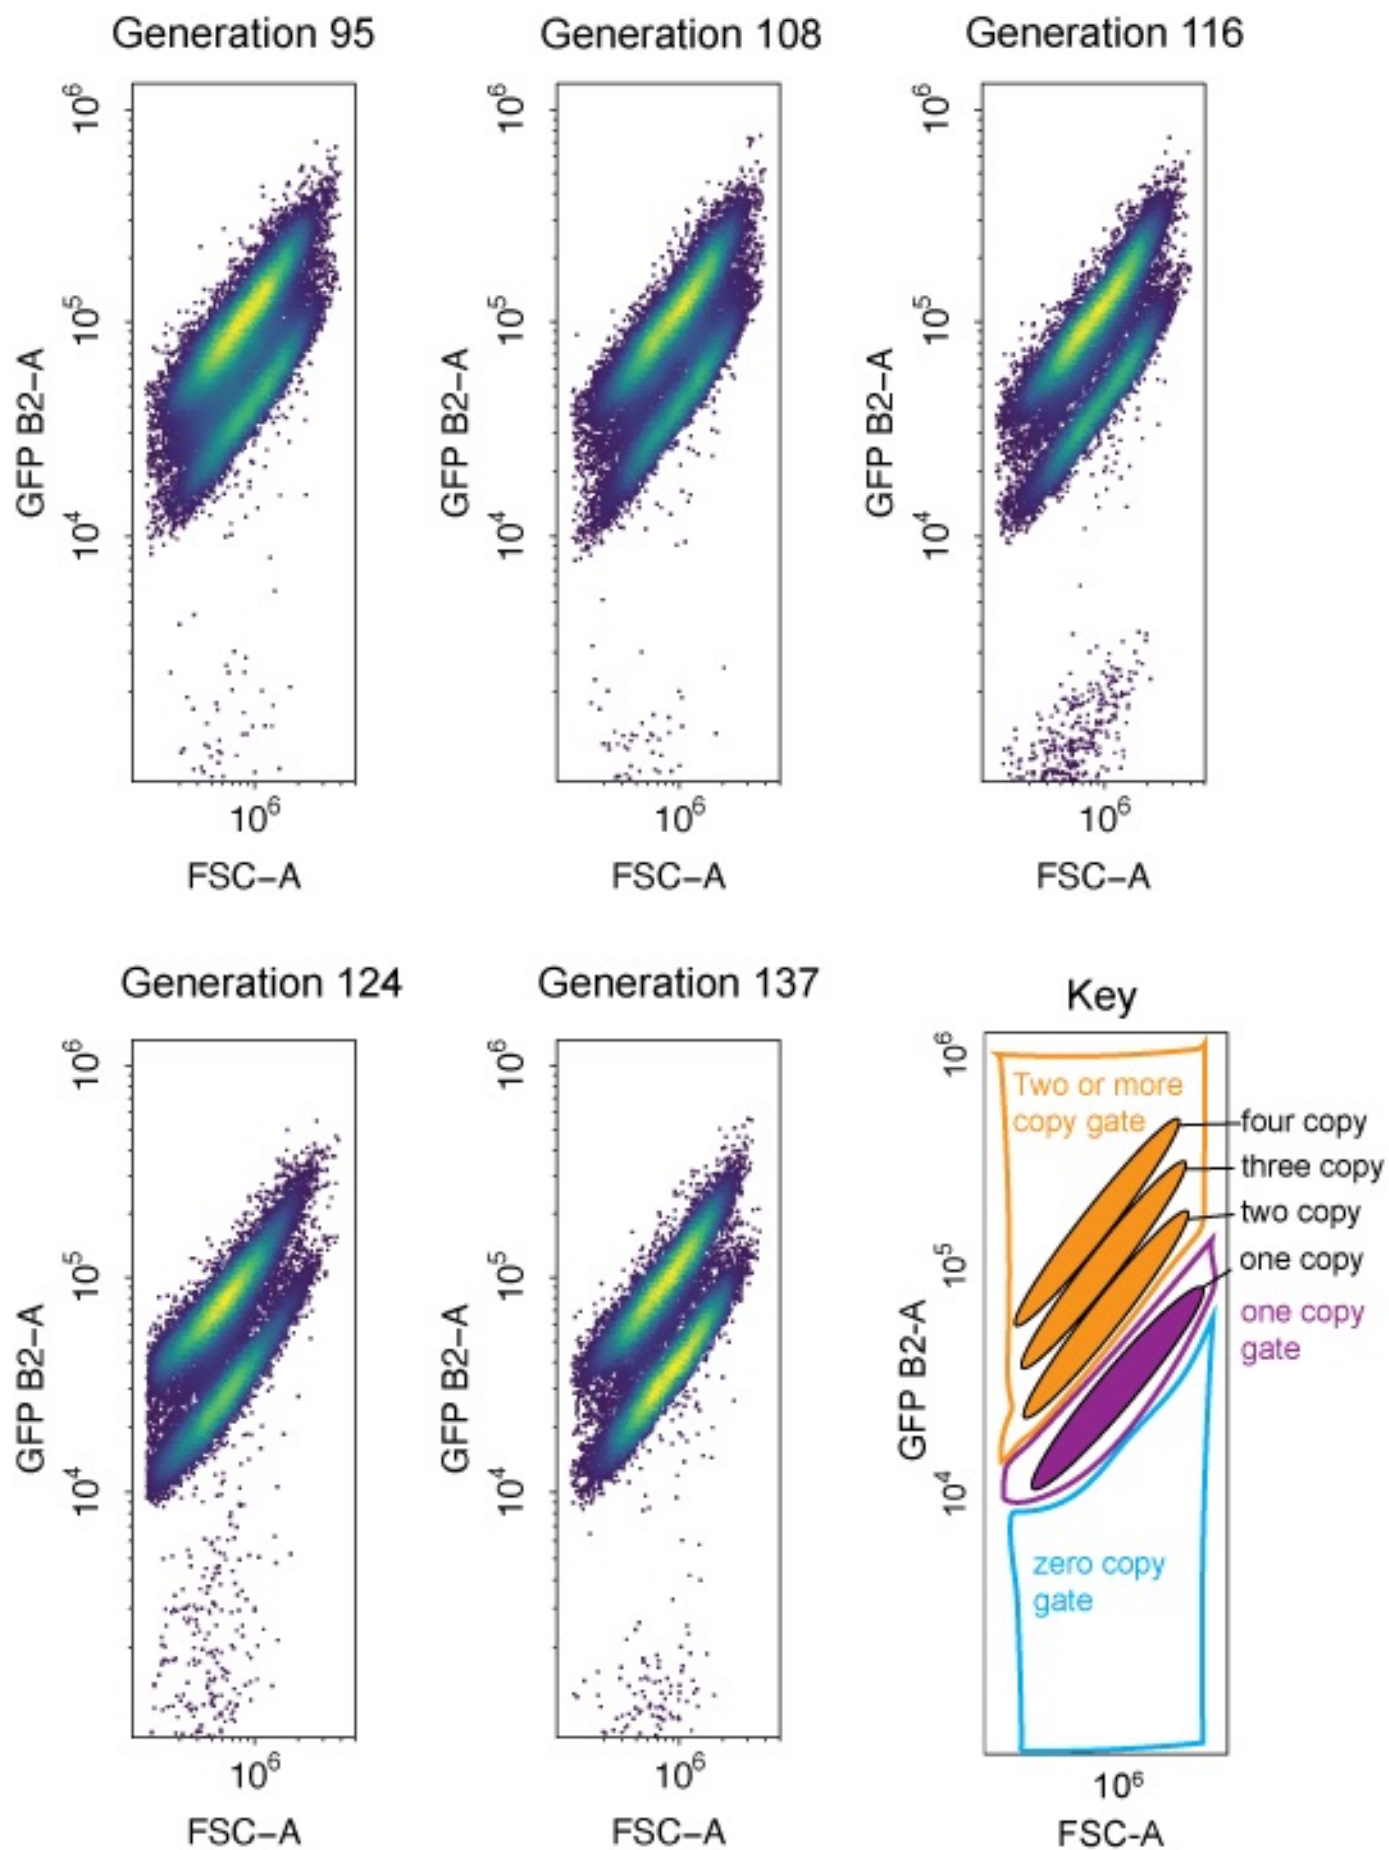

# LTR $\Delta$ population 4

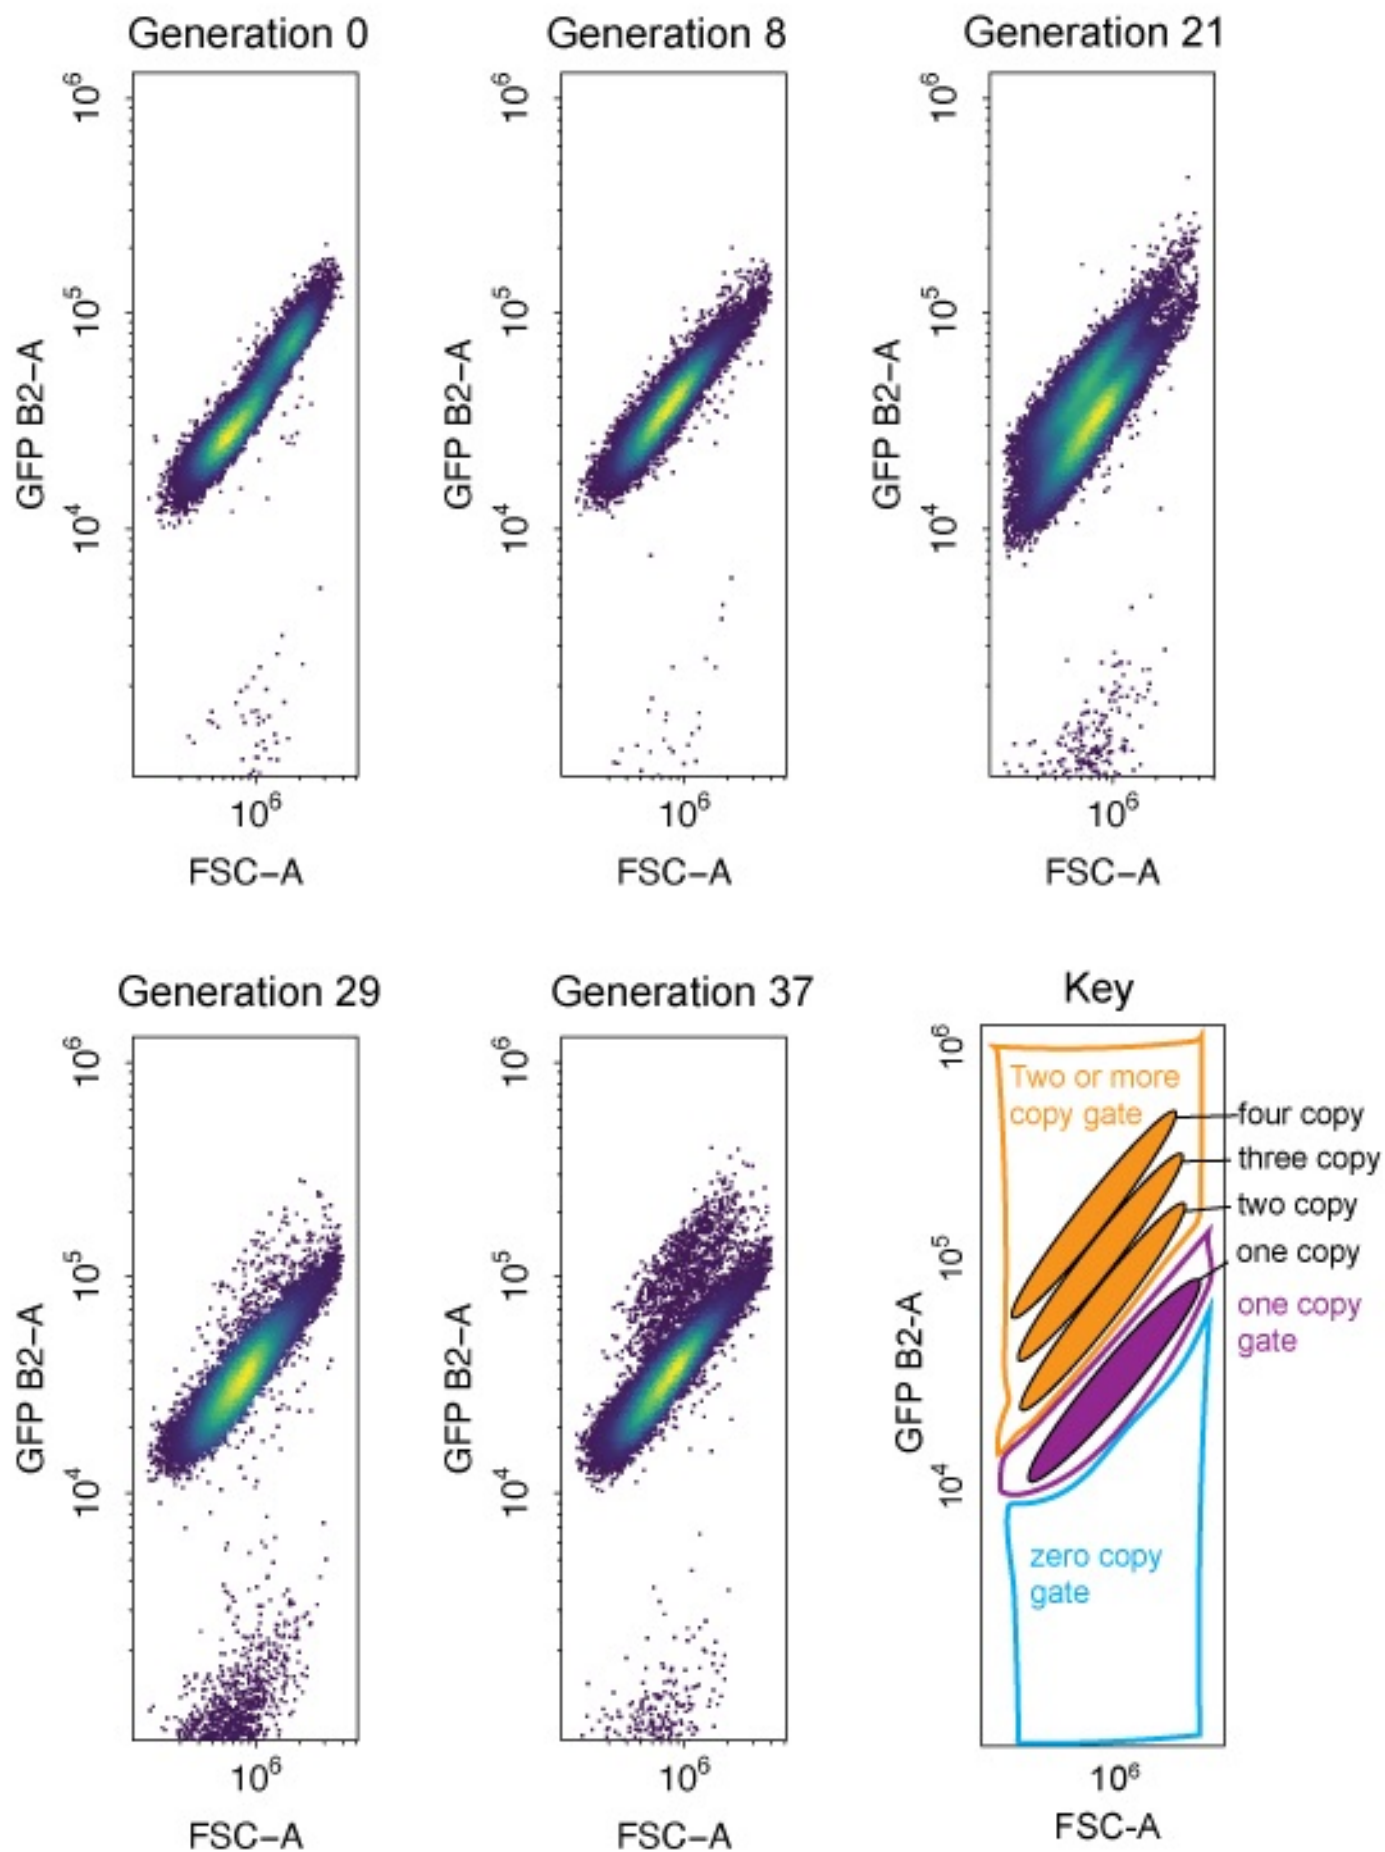

# LTR $\Delta$ population 4

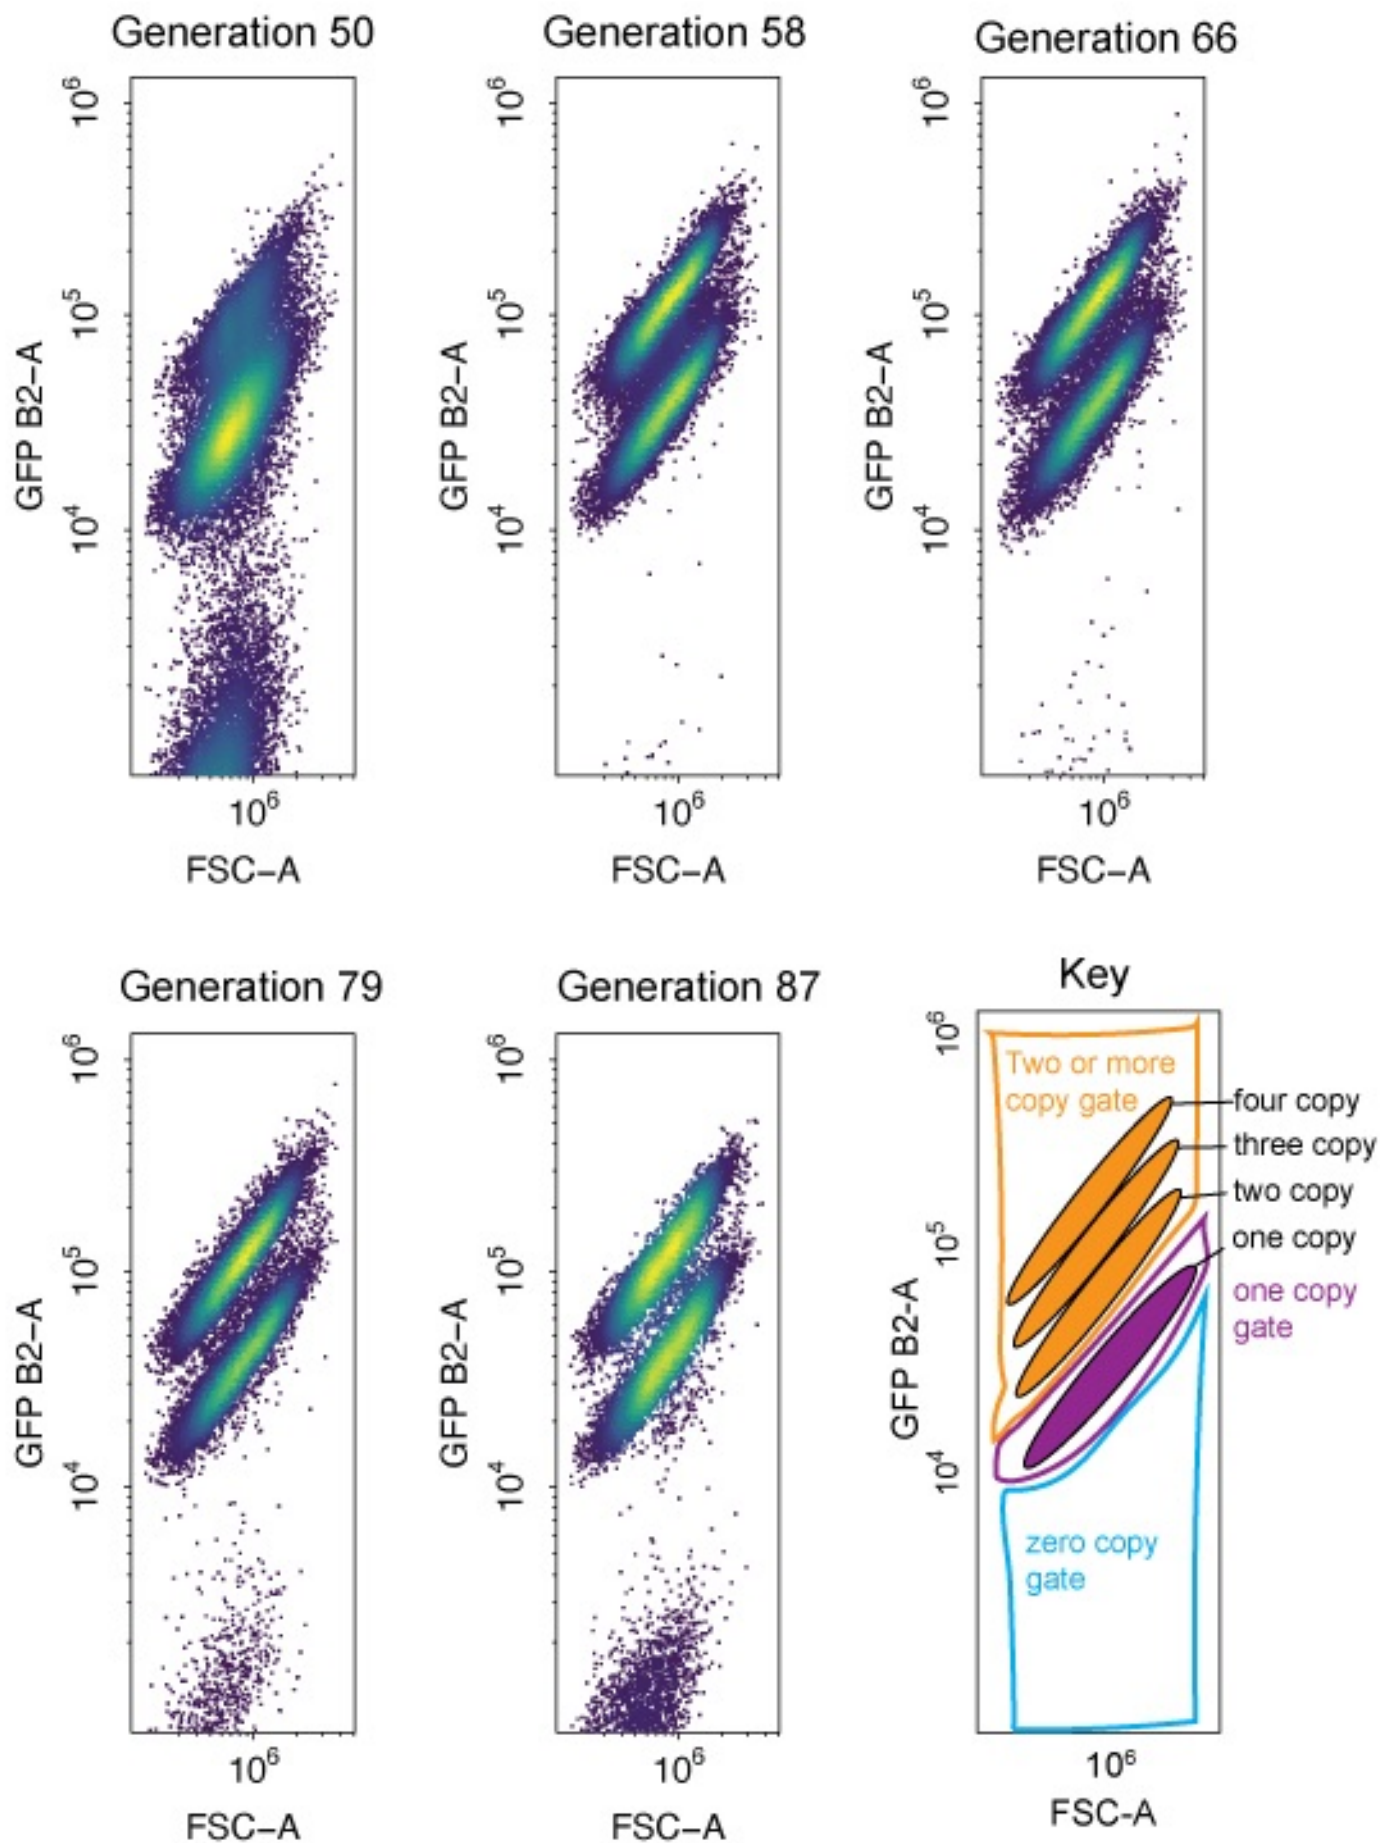

# LTR $\Delta$ population 4

Generation 95

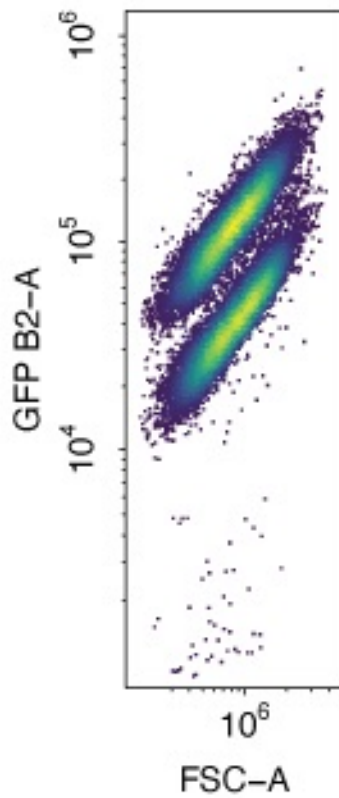

Generation 108

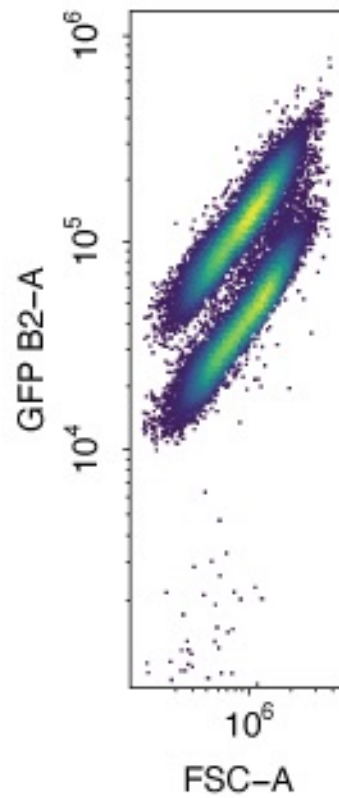

Generation 116

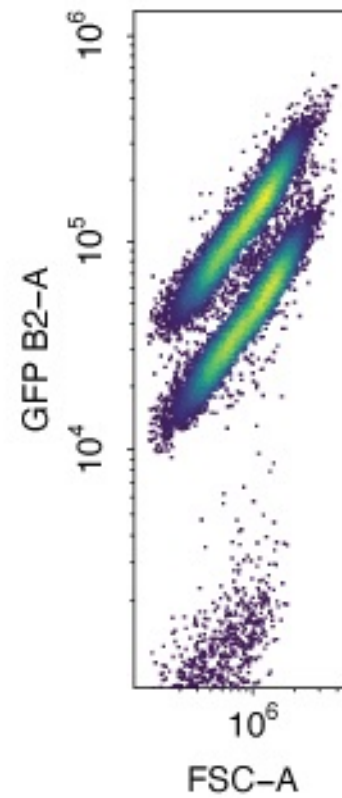

Generation 124

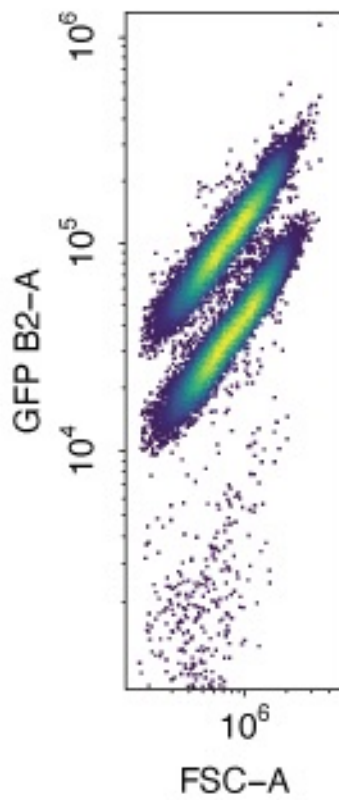

Generation 137

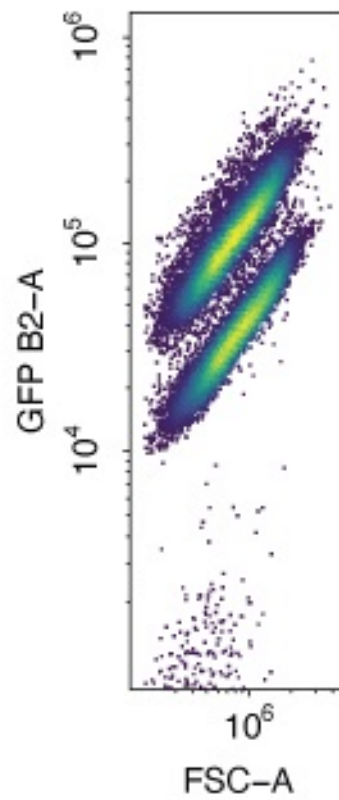

Key

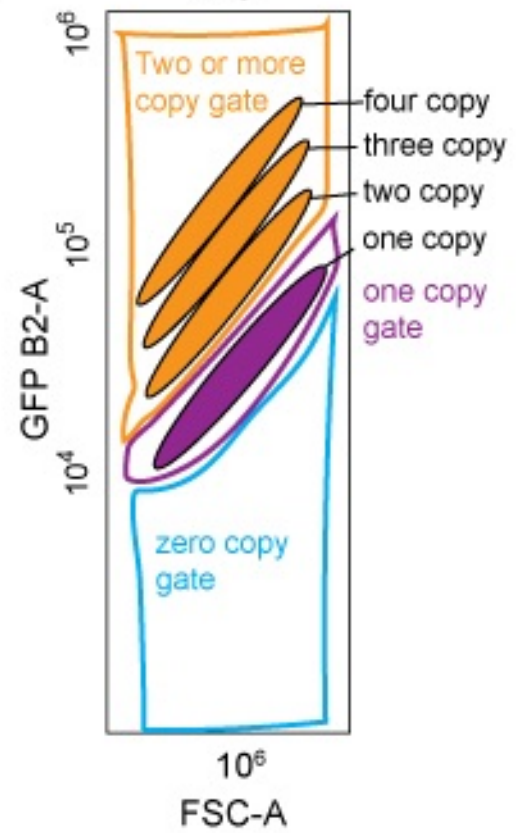



# LTR $\Delta$ population 5

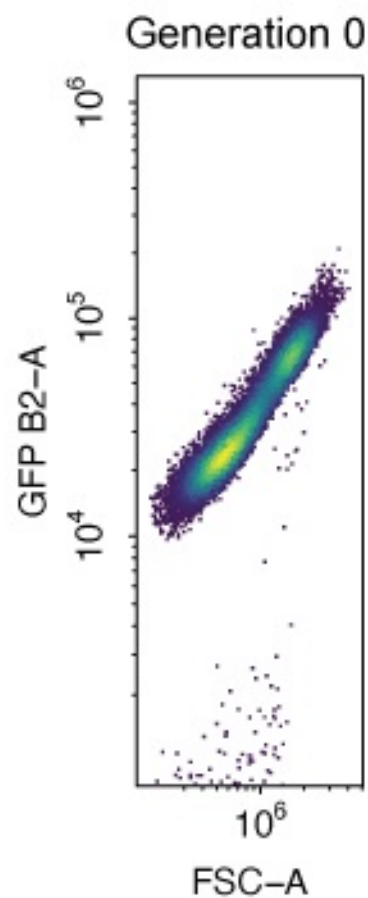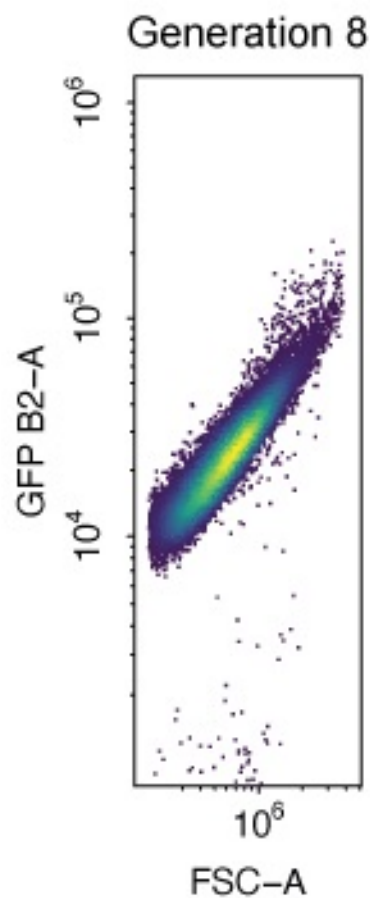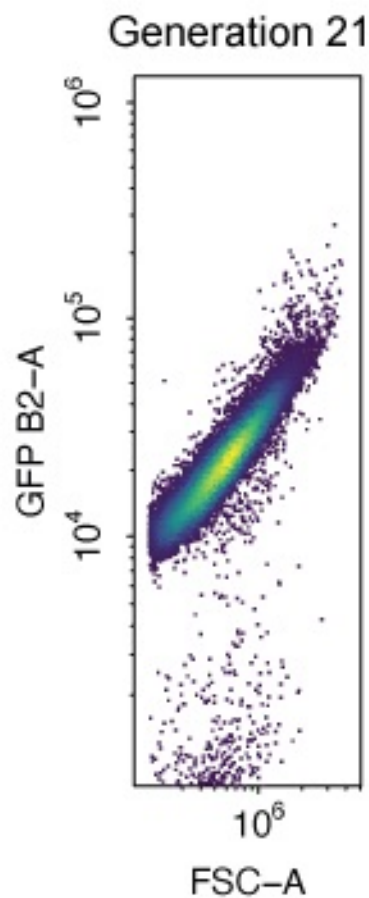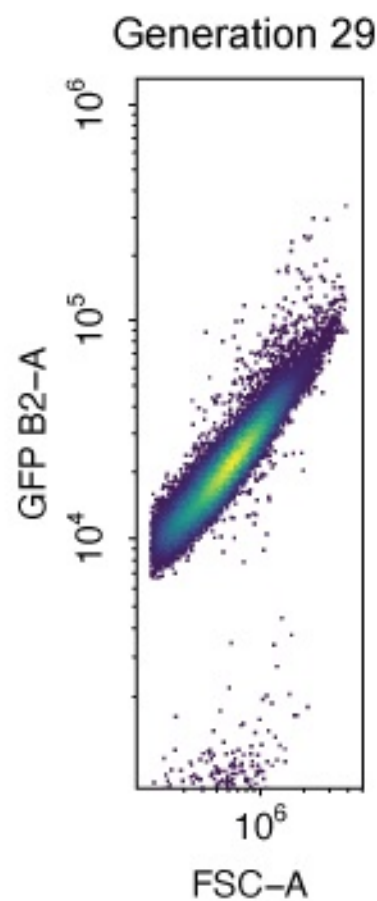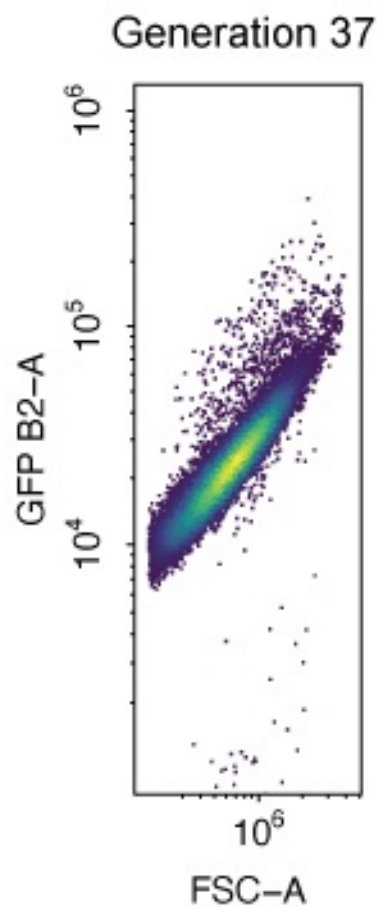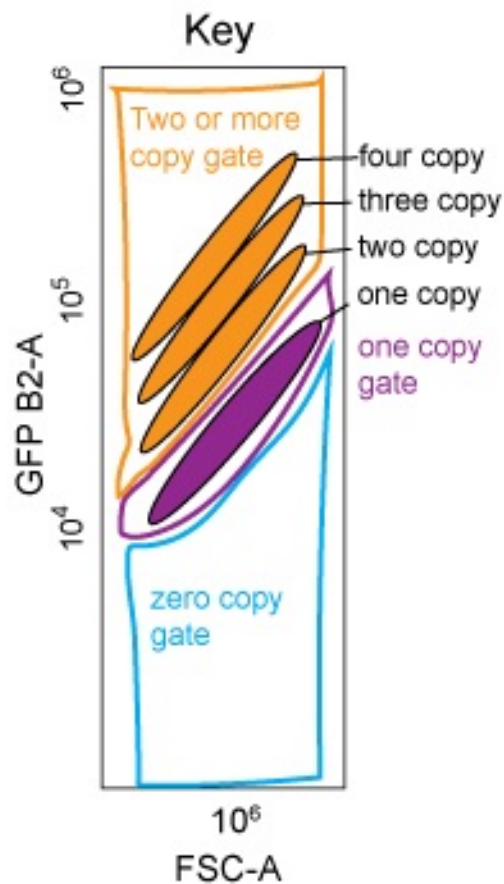

# LTR $\Delta$ population 5

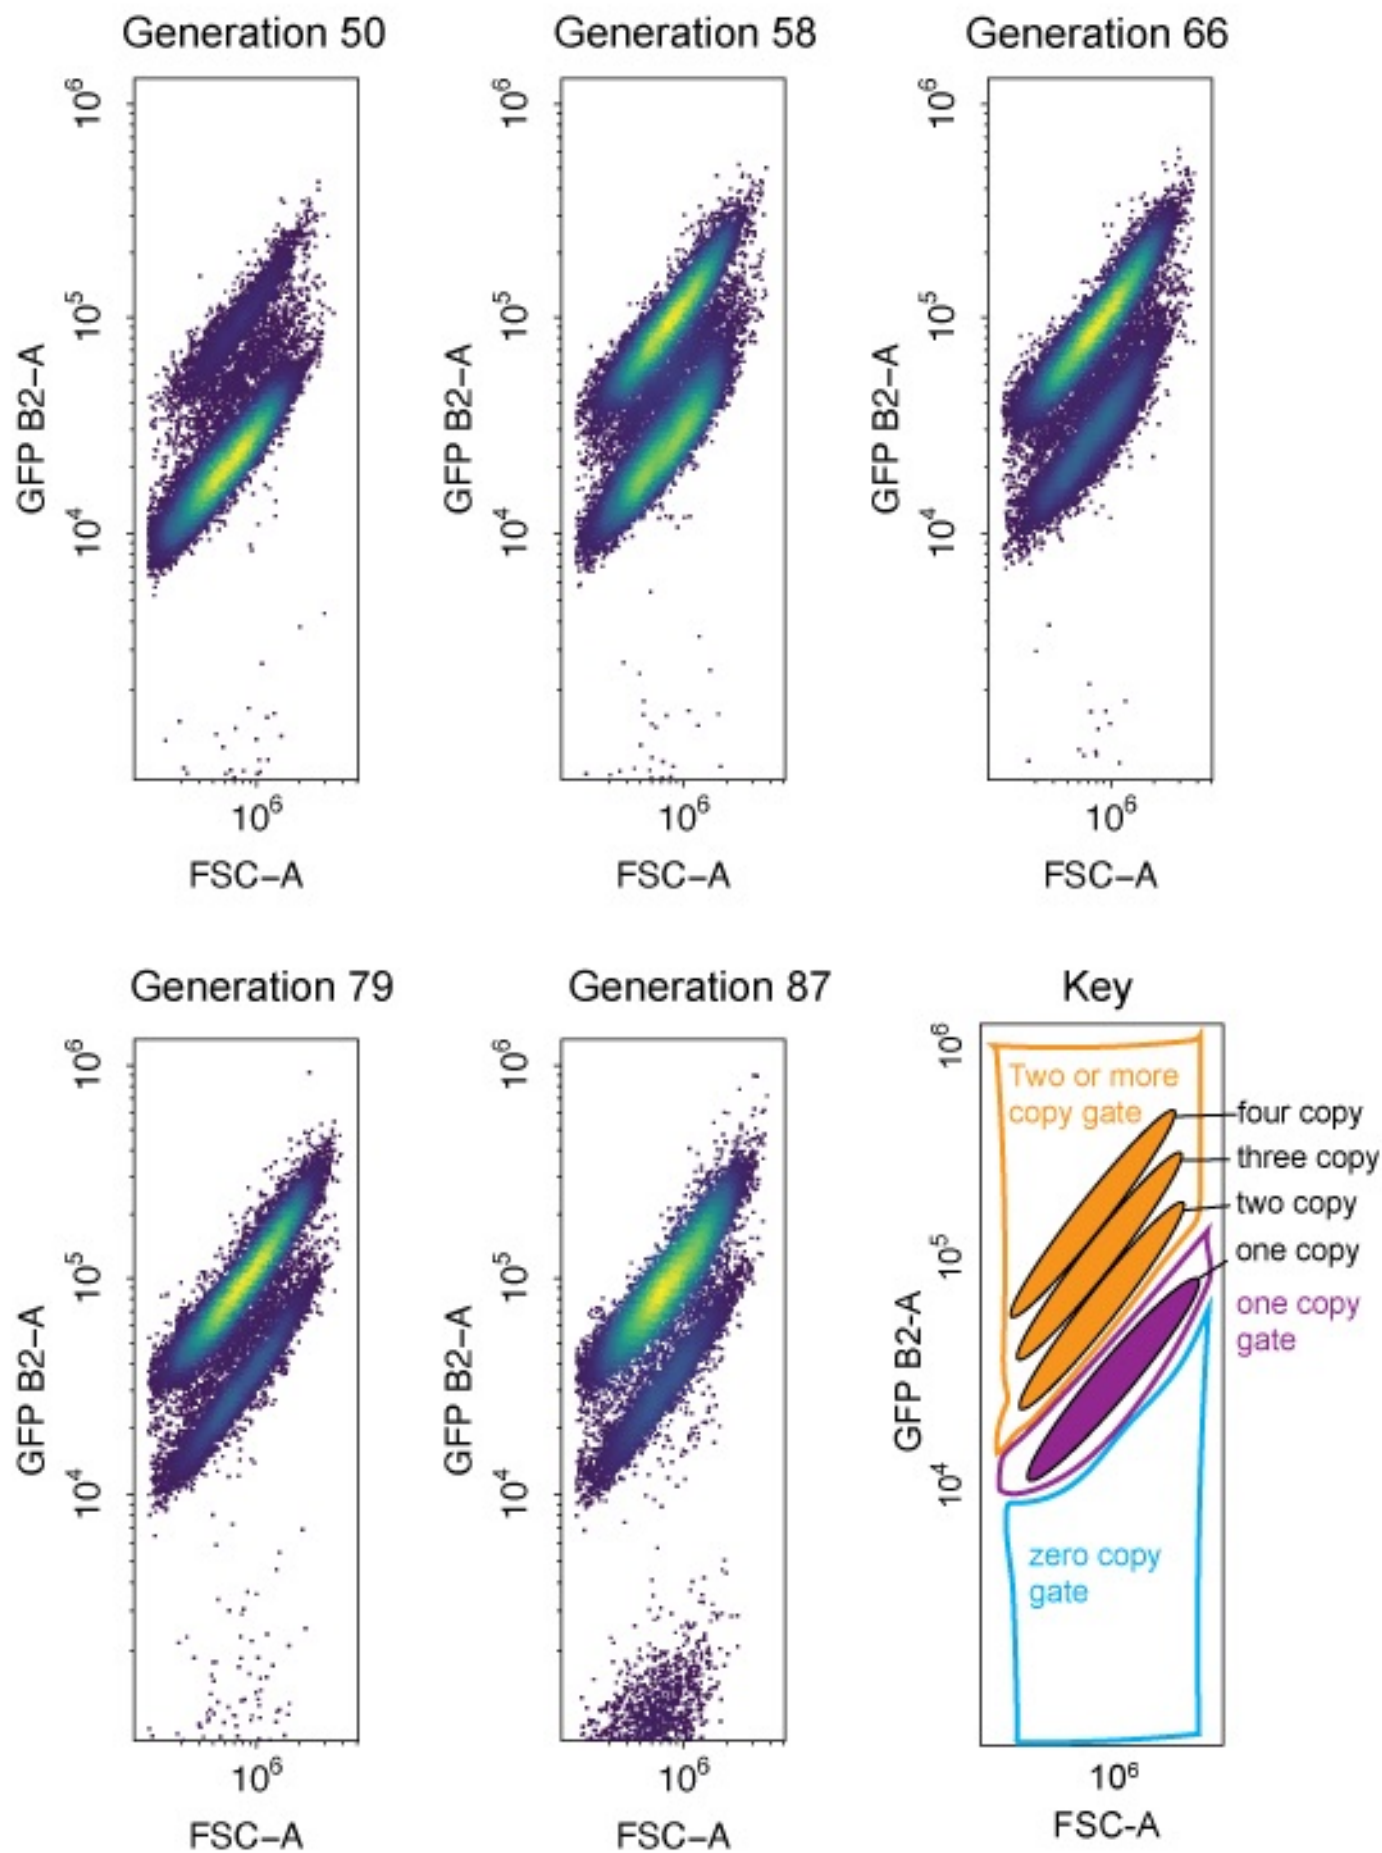

# LTR $\Delta$ population 5

Generation 95

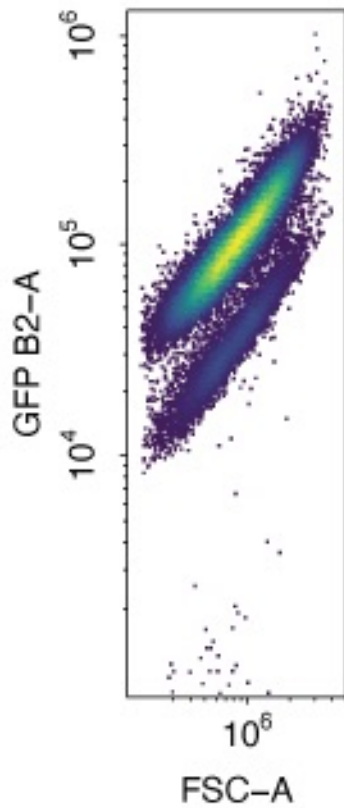

Generation 108

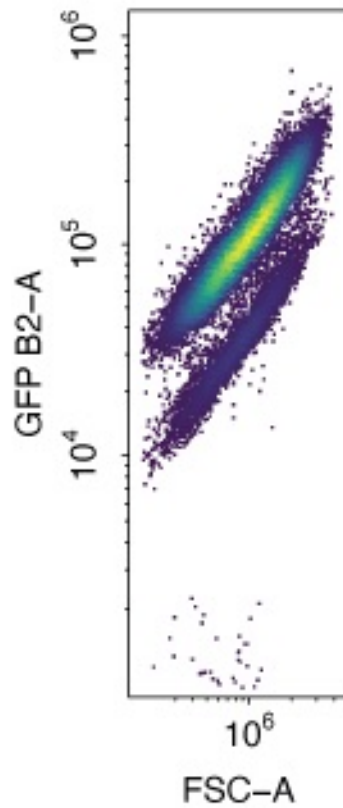

Generation 116

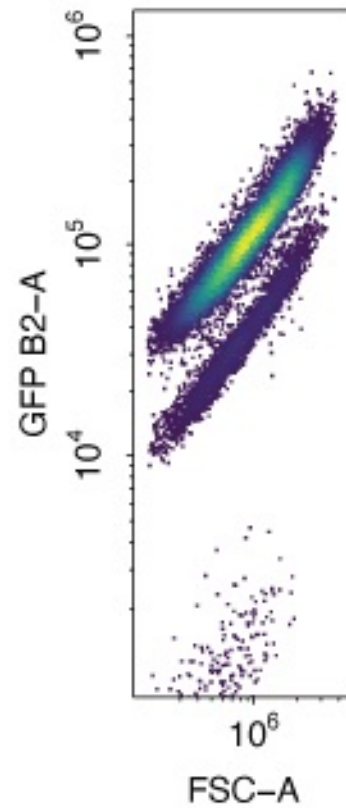

Generation 124

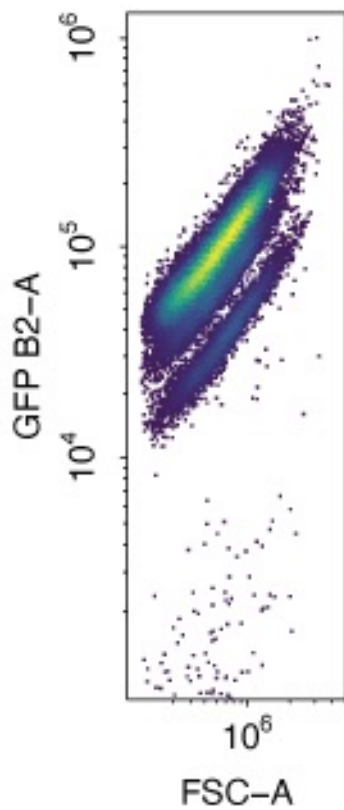

Generation 137

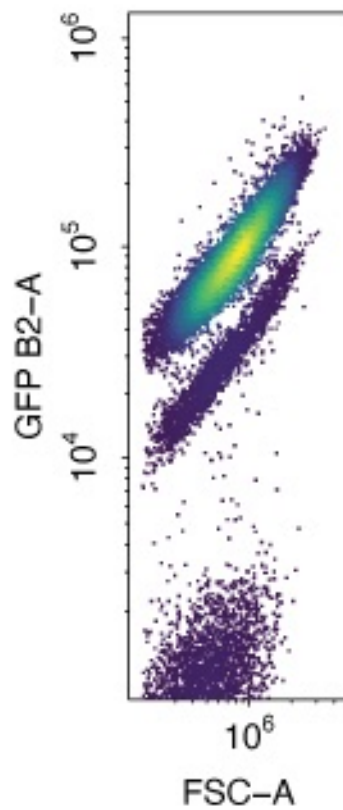

Key

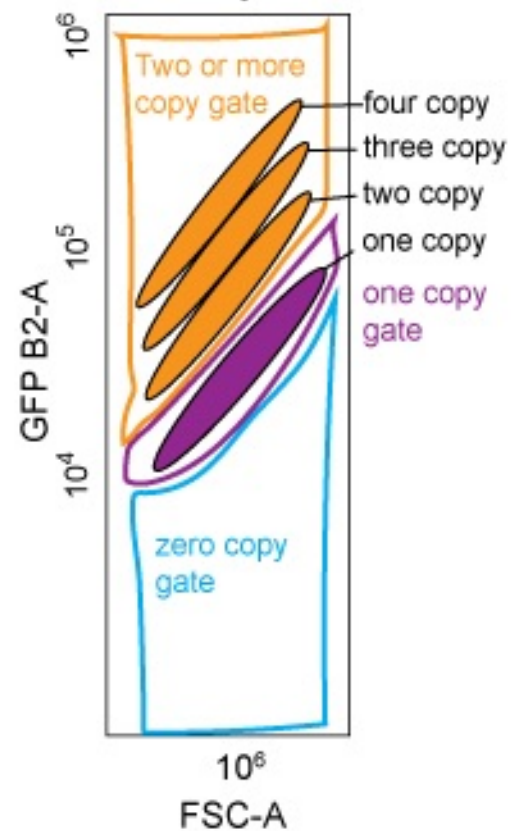

# LTR $\Delta$ population 6

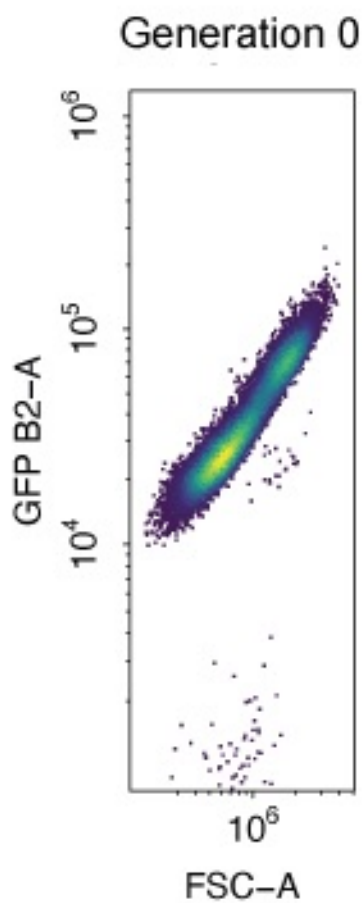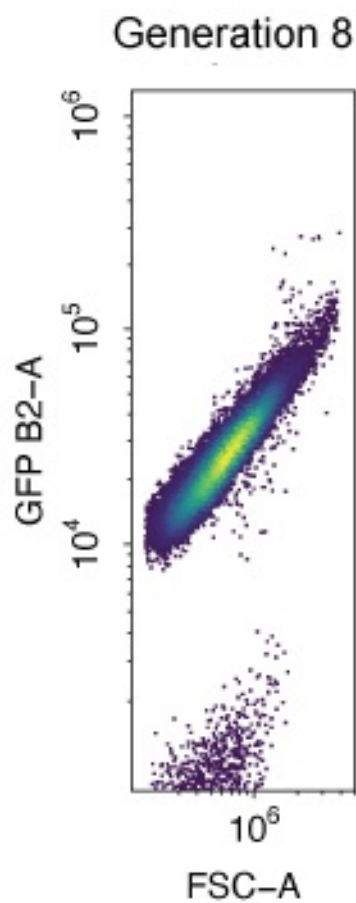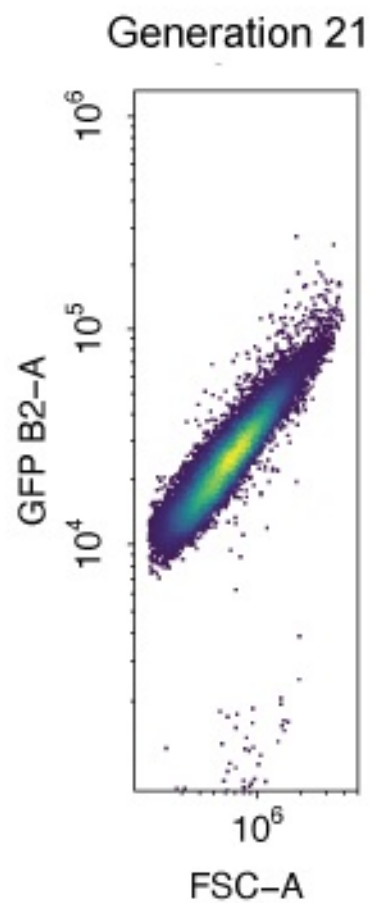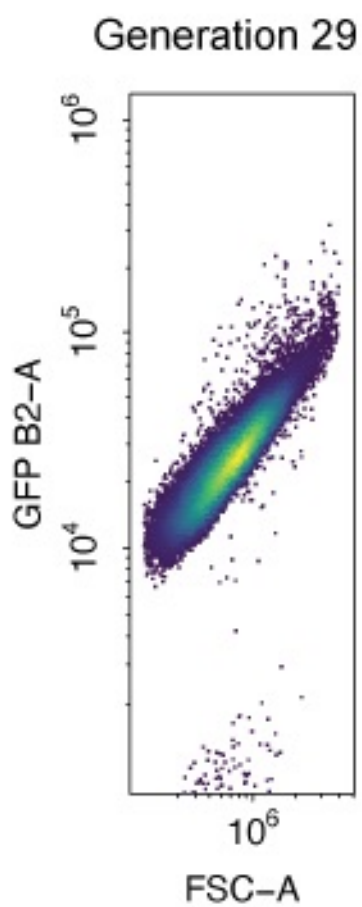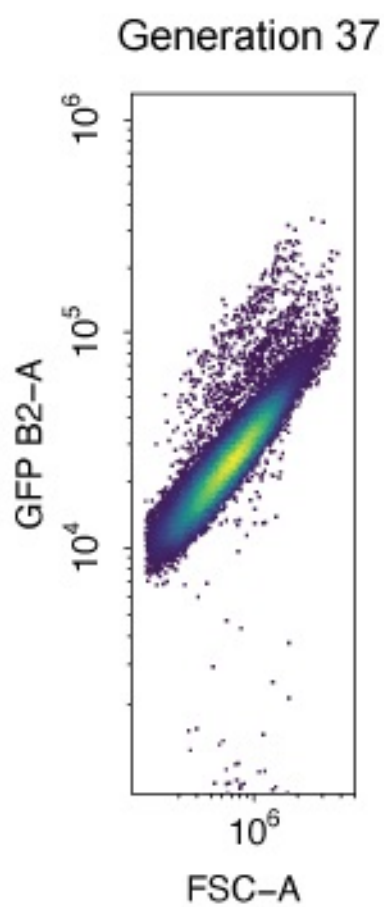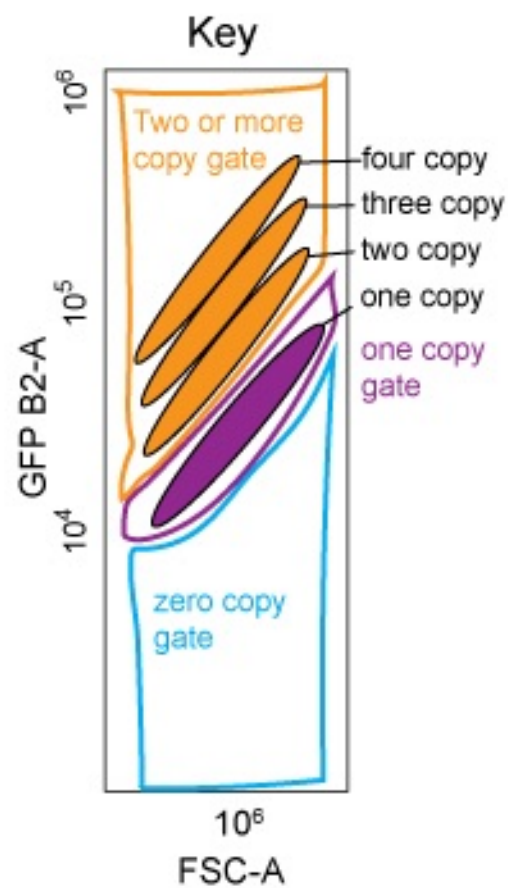

# LTR $\Delta$ population 6

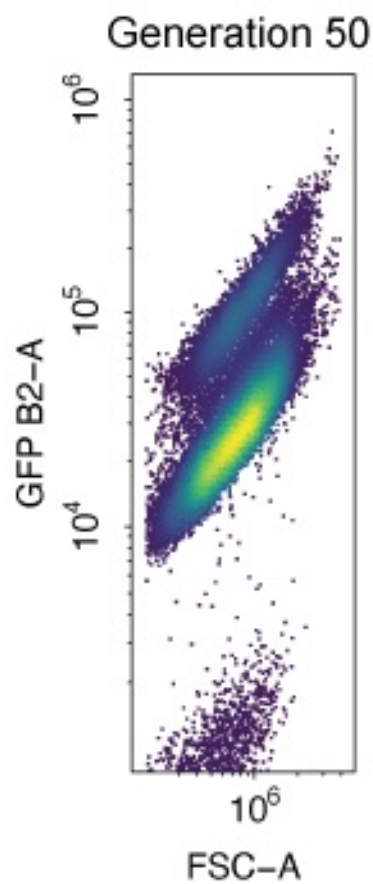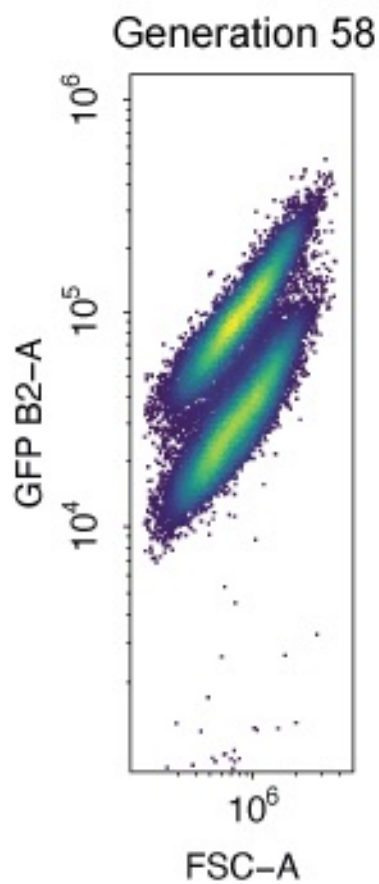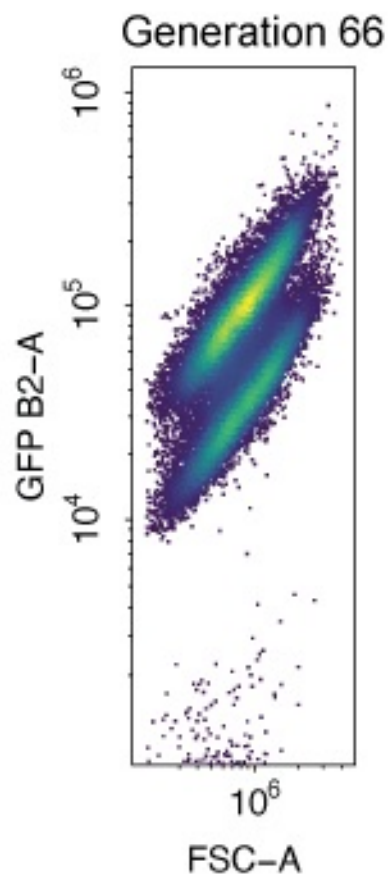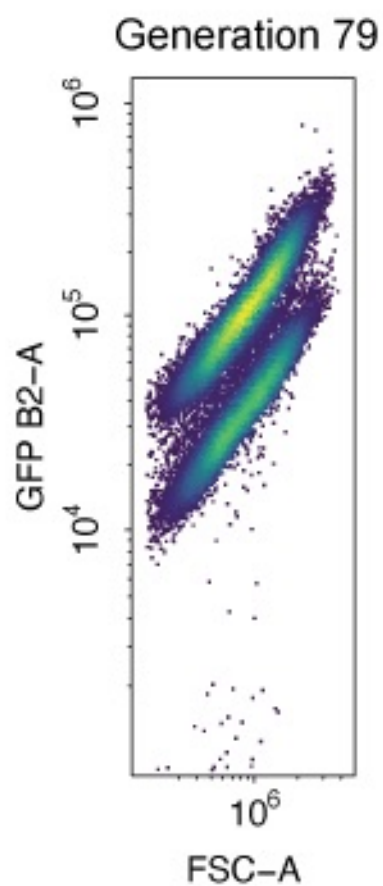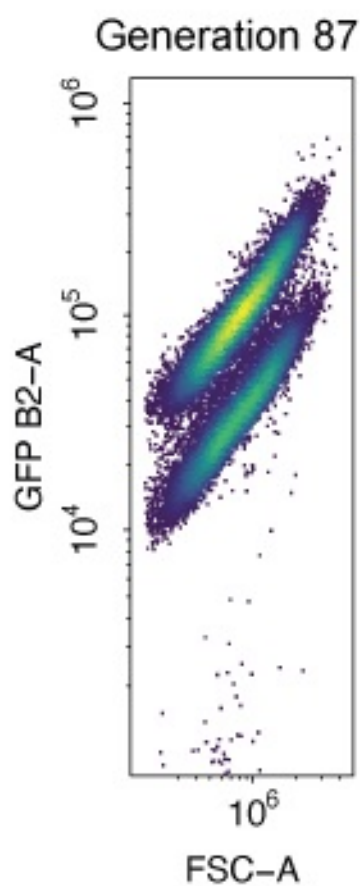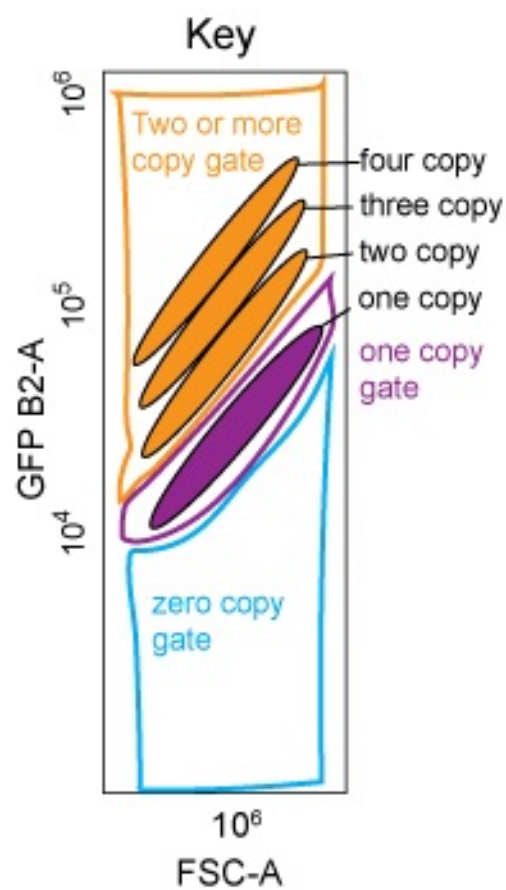

# LTR $\Delta$ population 6

Generation 95

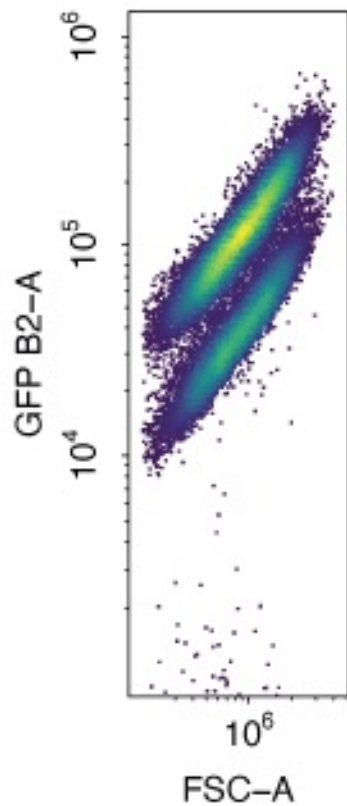

Generation 108

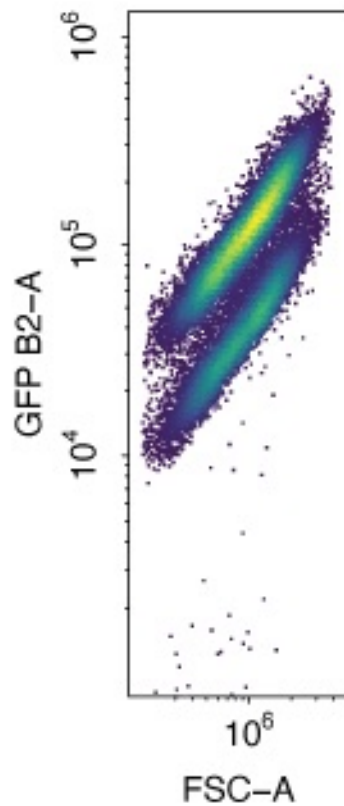

Generation 116

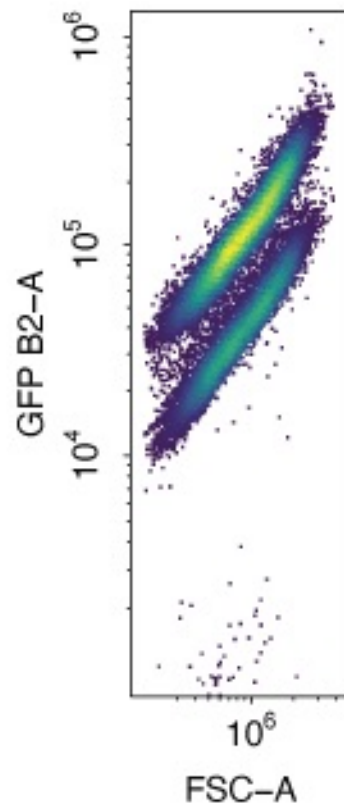

Generation 124

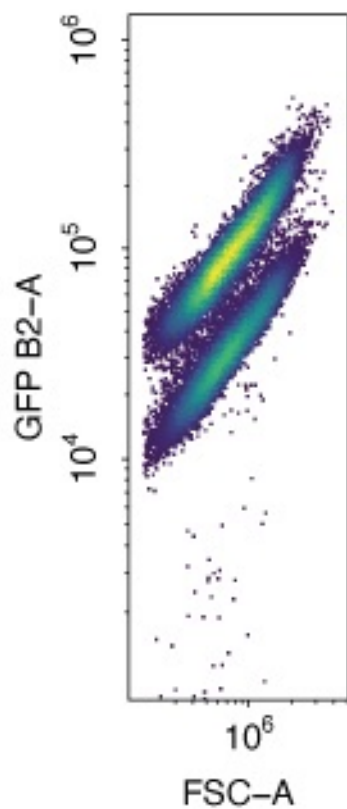

Generation 137

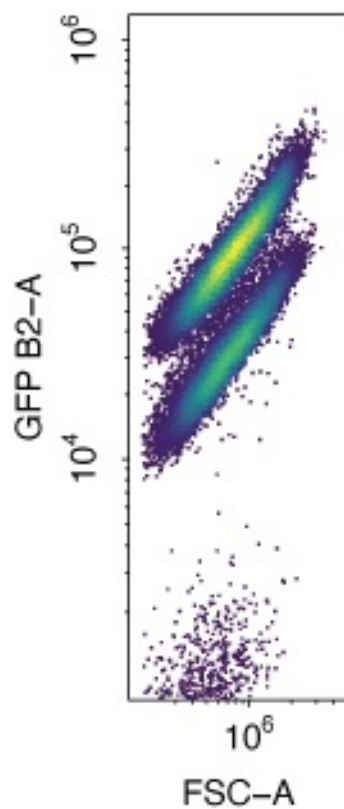

Key

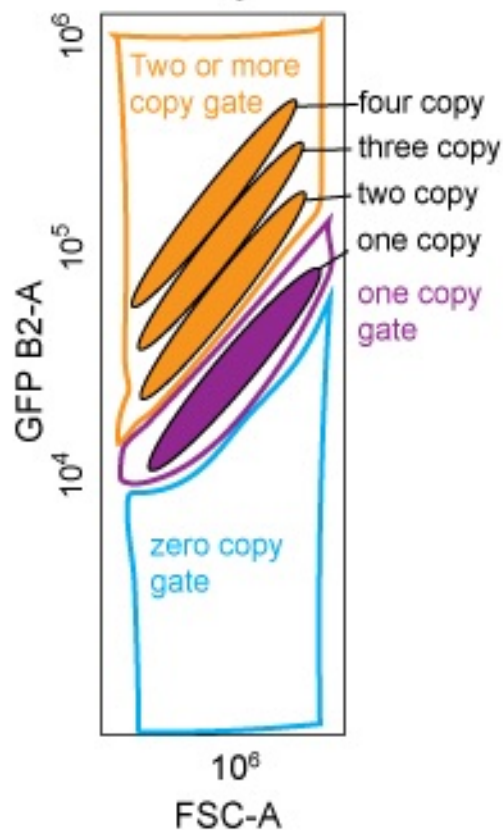

# LTR $\Delta$ population 7

Generation 0

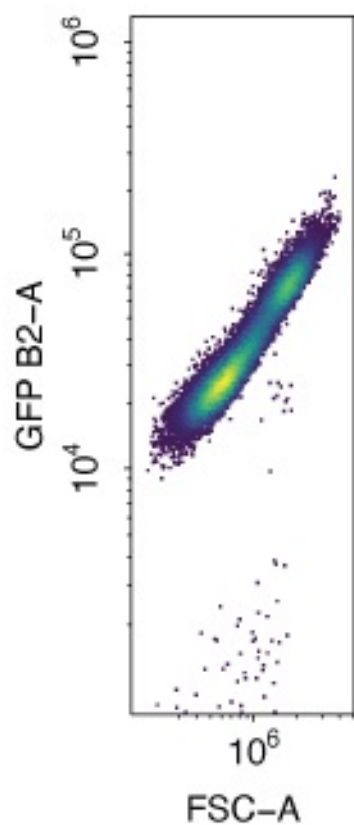

Generation 8

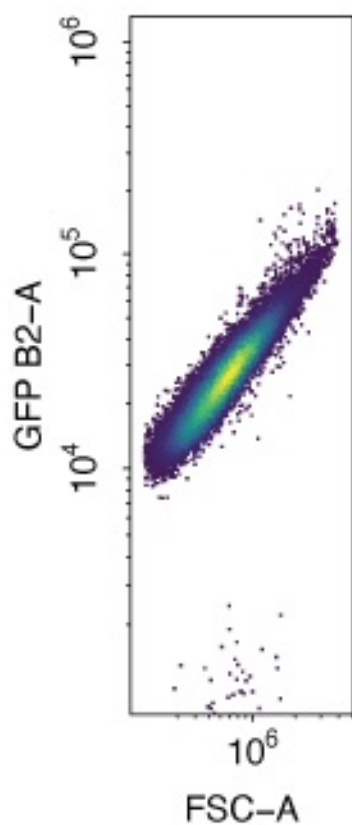

Generation 21

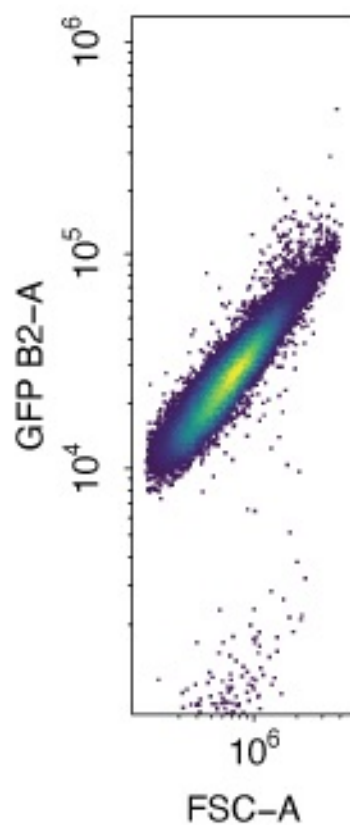

Generation 29

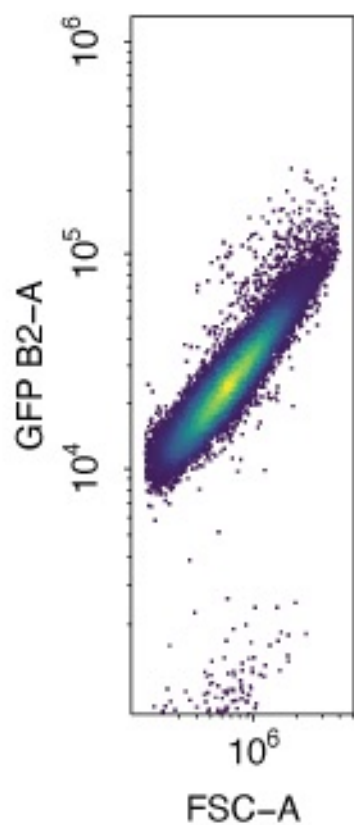

Generation 37

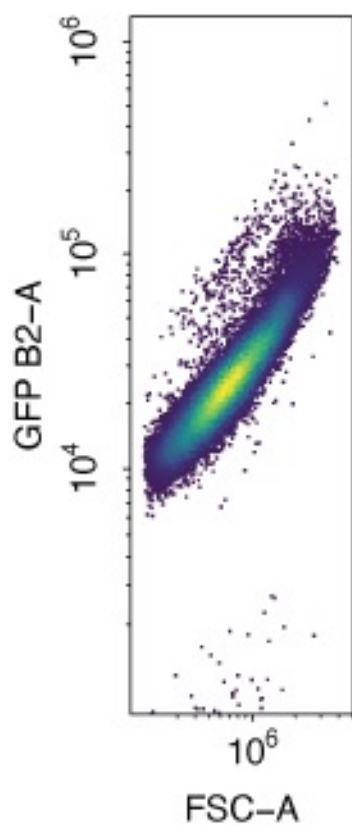

Key

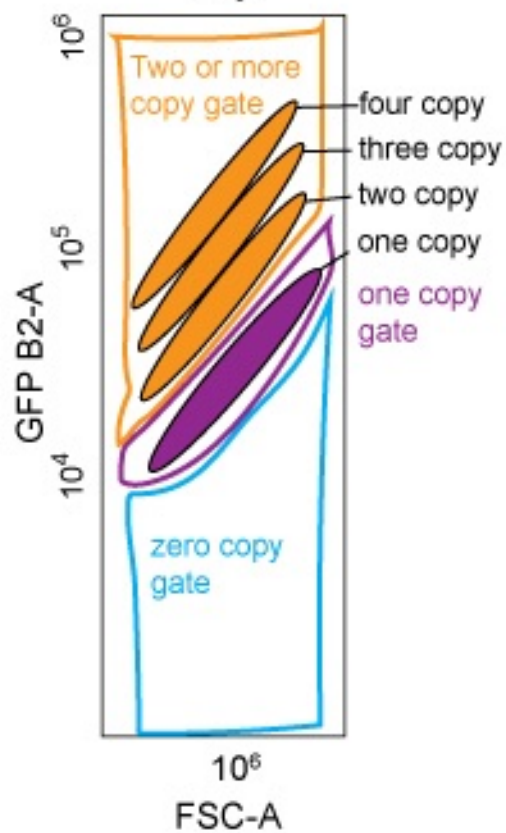

# LTR $\Delta$ population 7

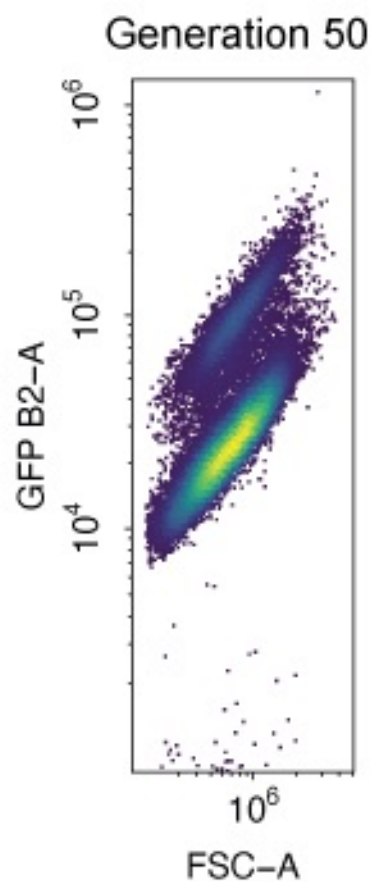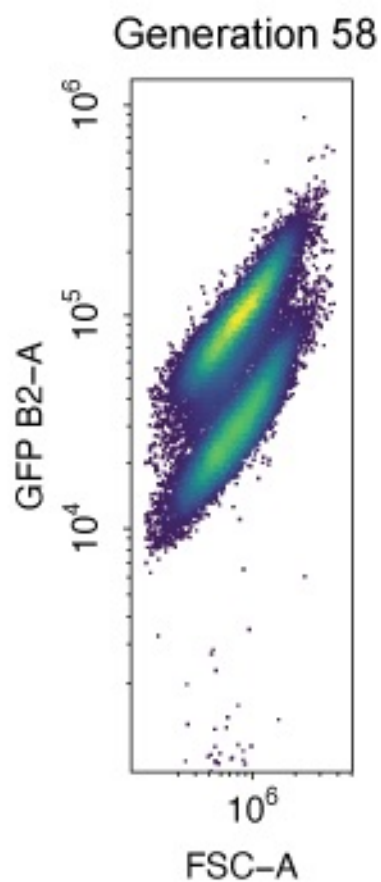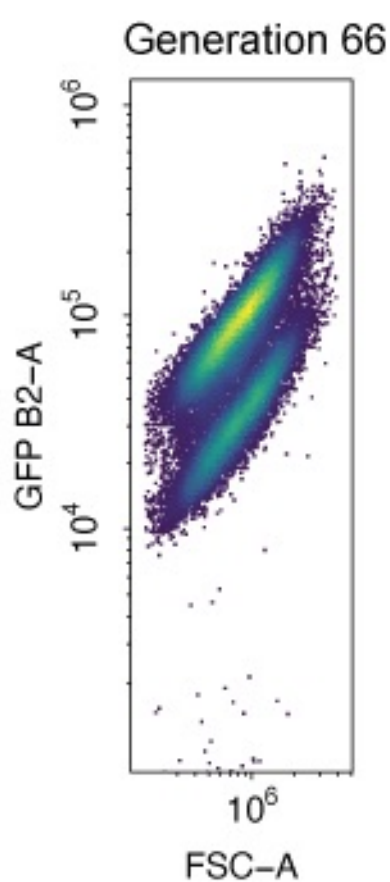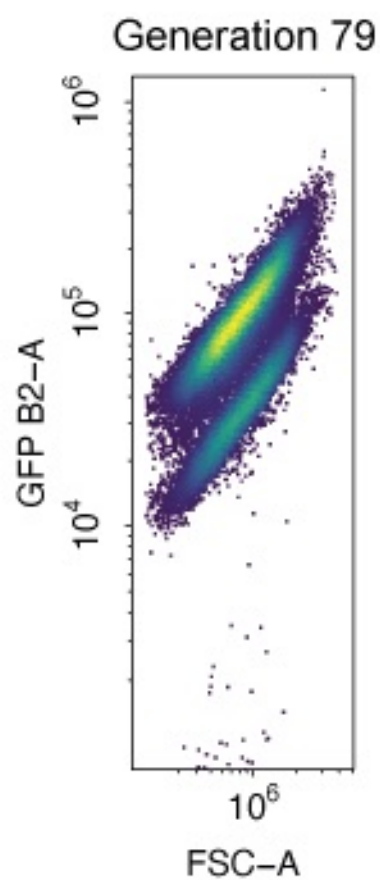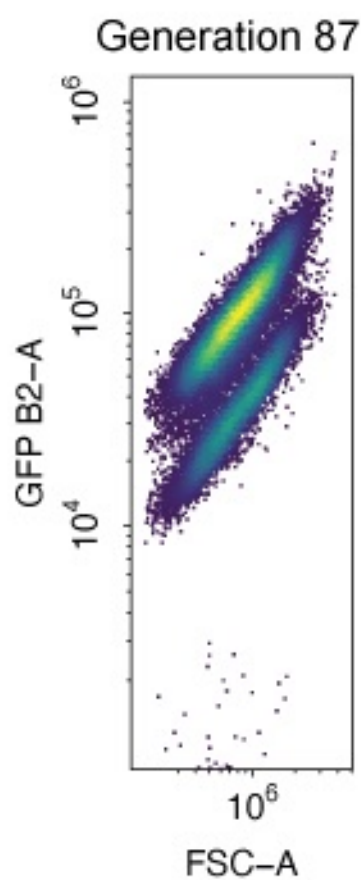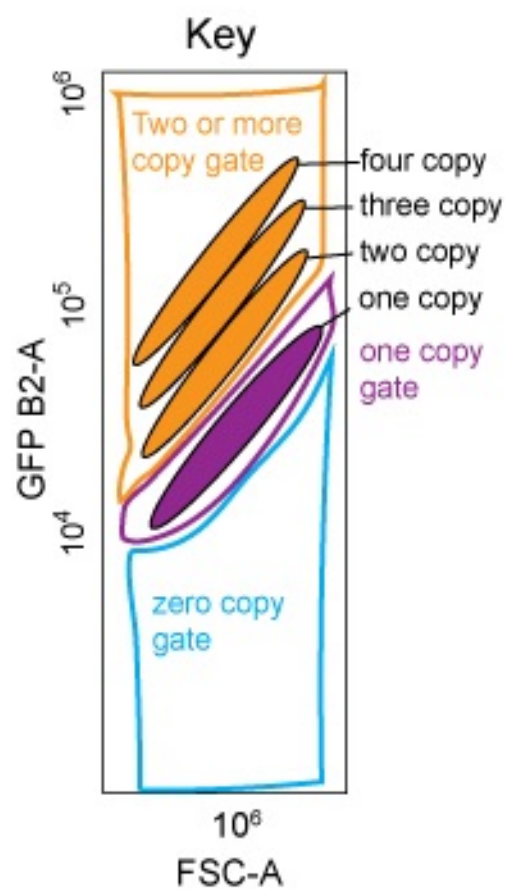



# LTR $\Delta$ population 7

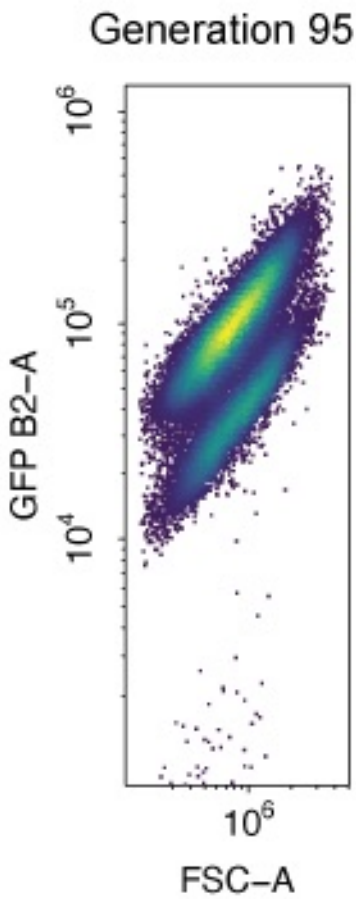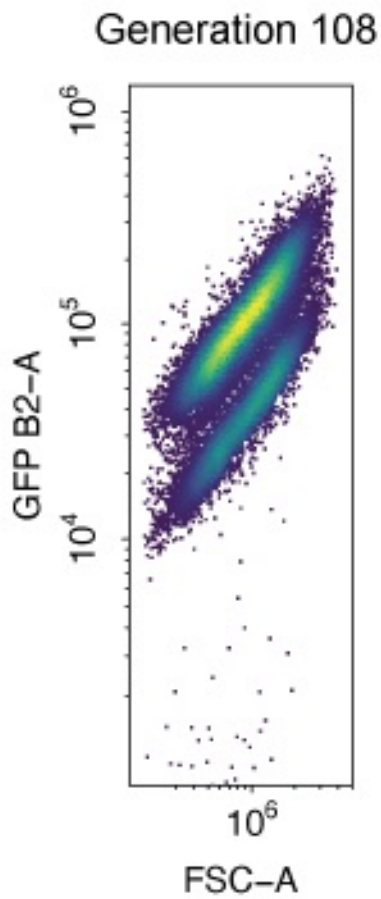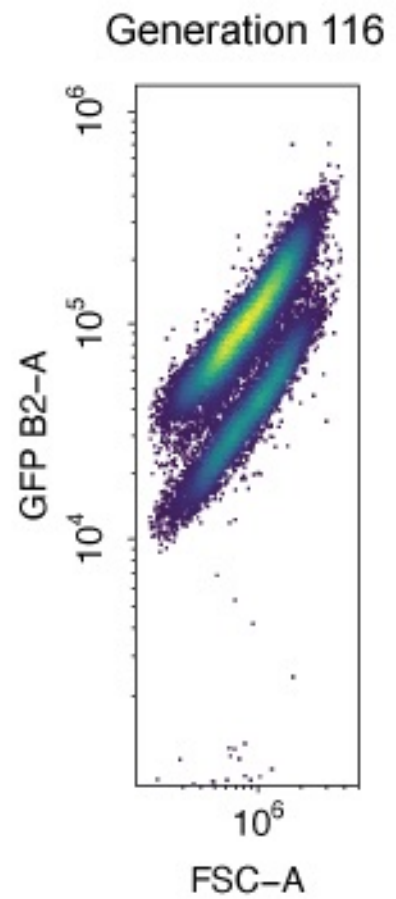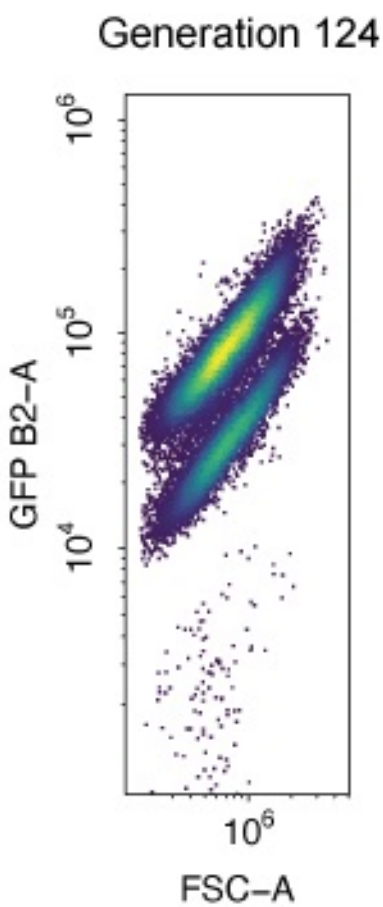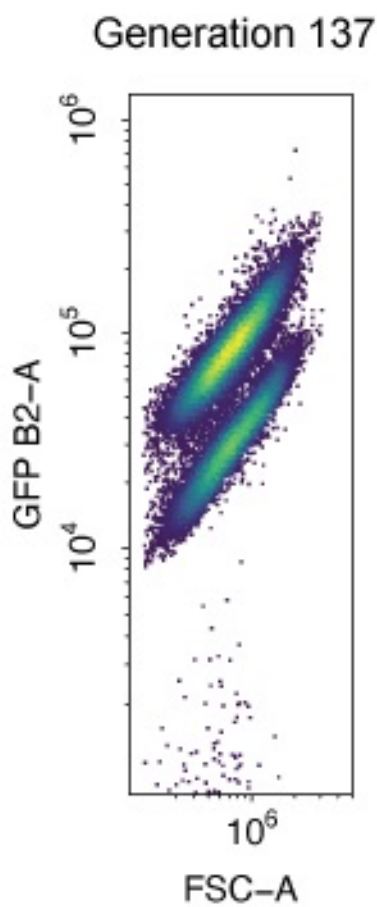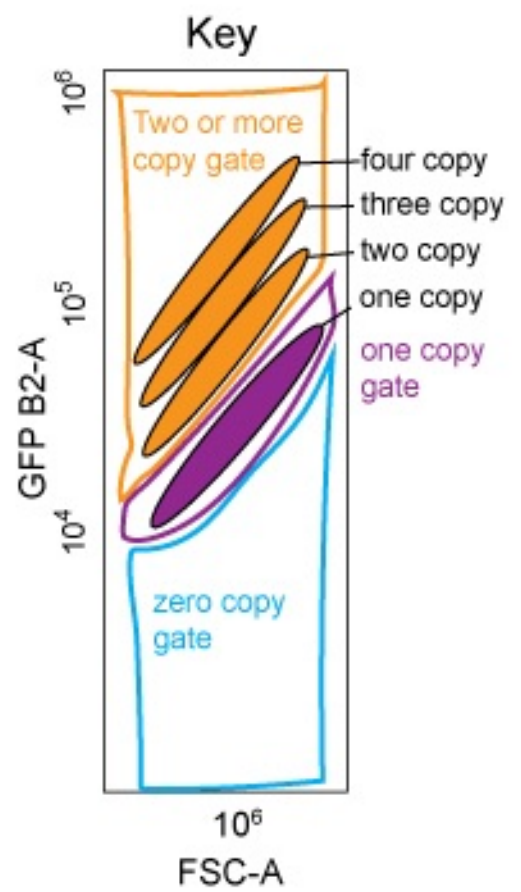

# LTR $\Delta$ population 8

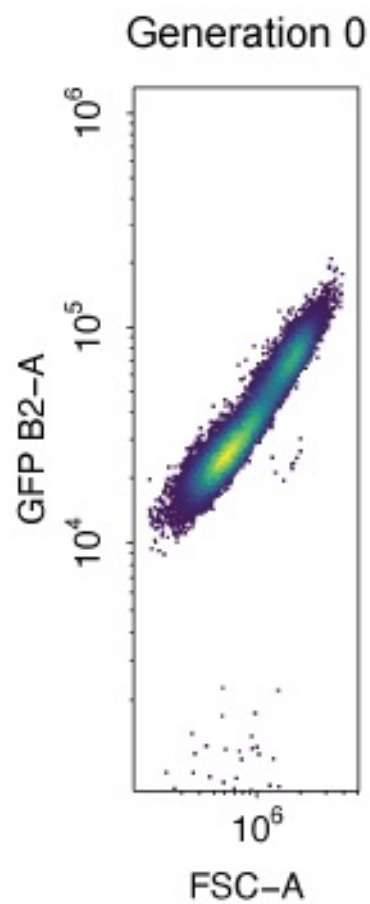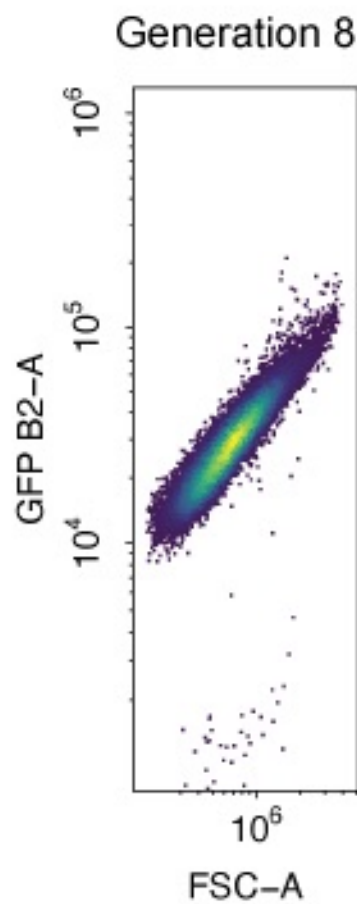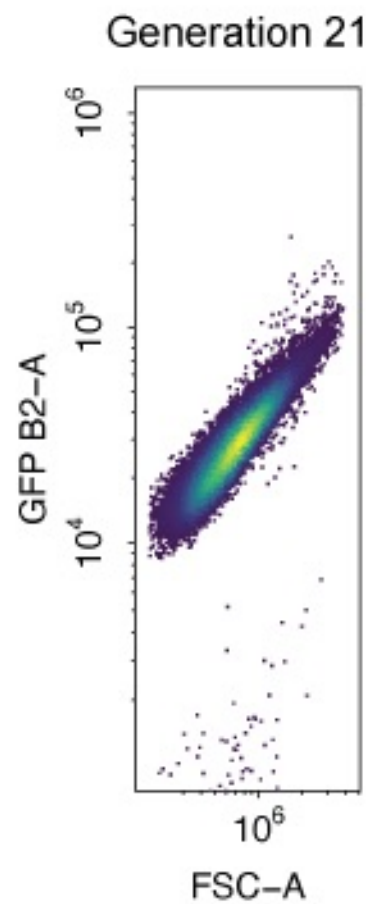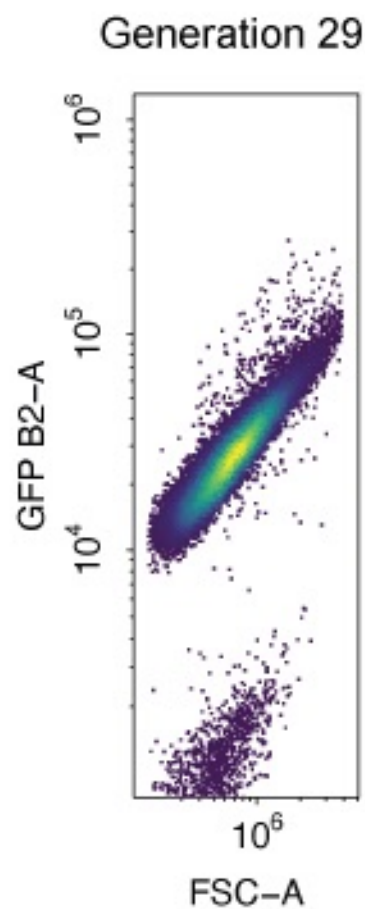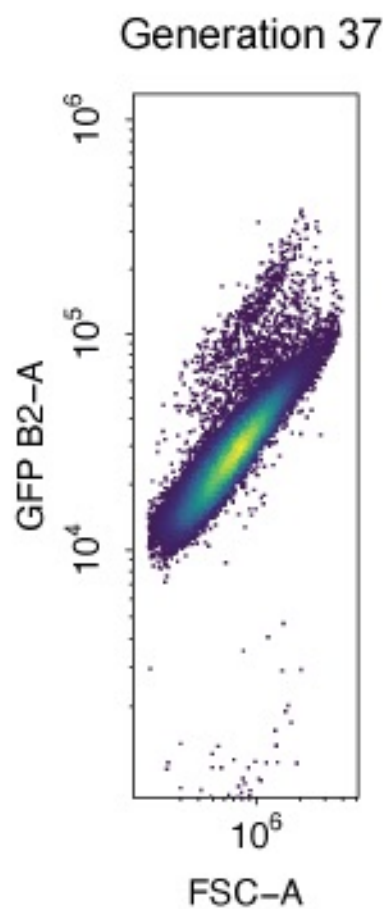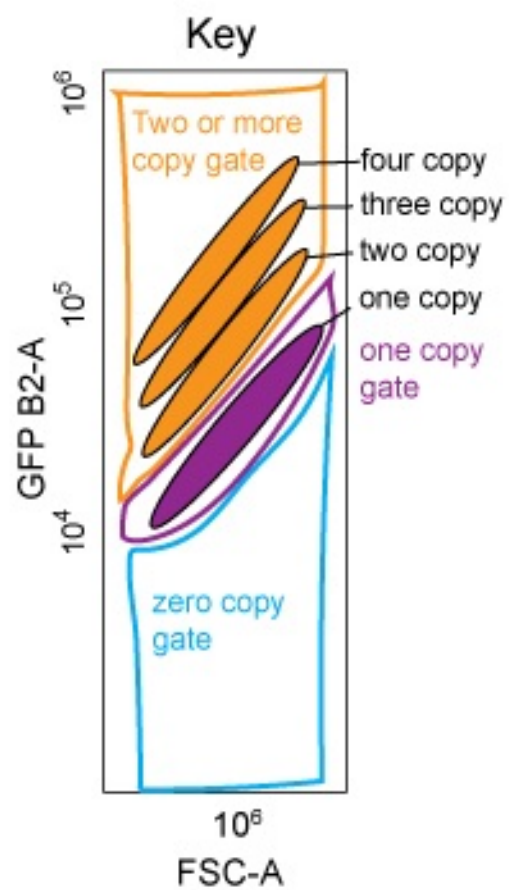

# LTR $\Delta$ population 8

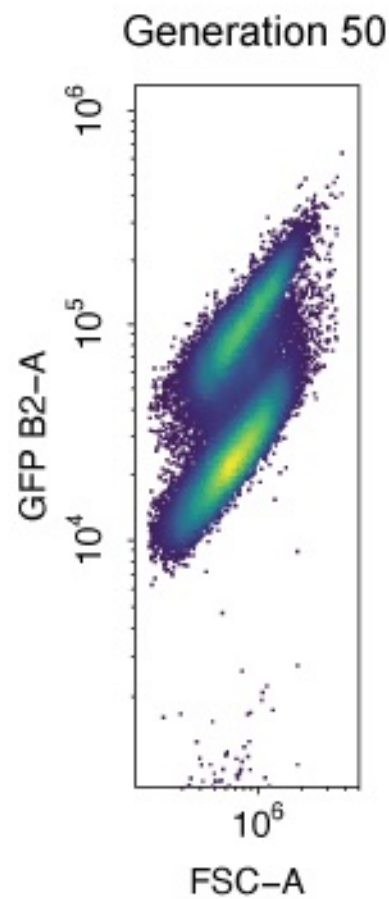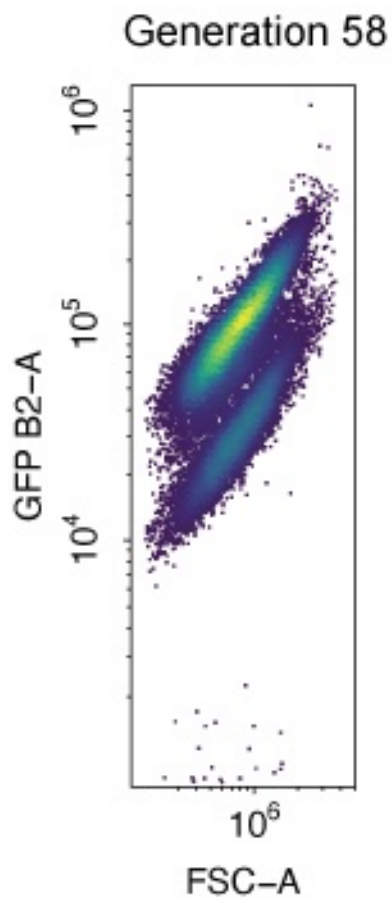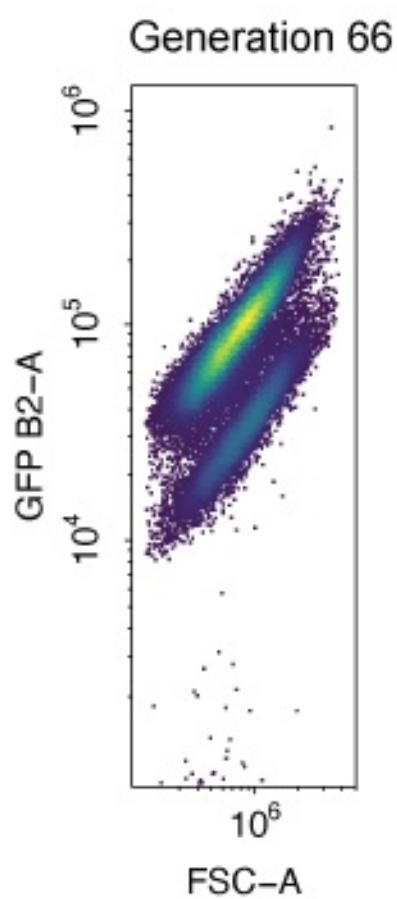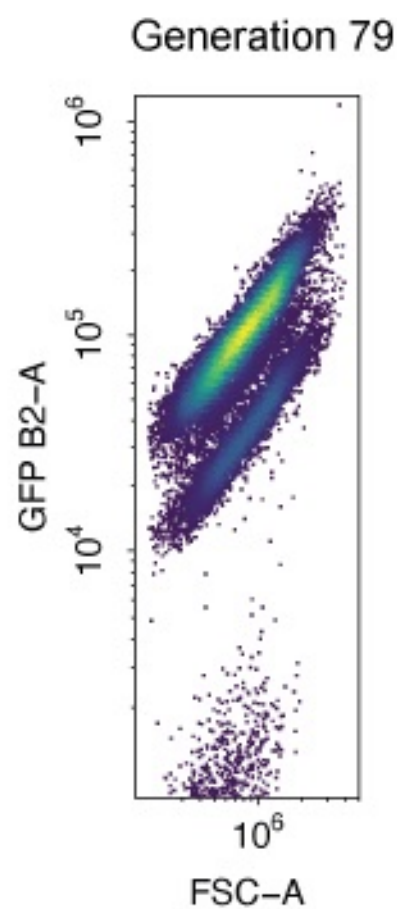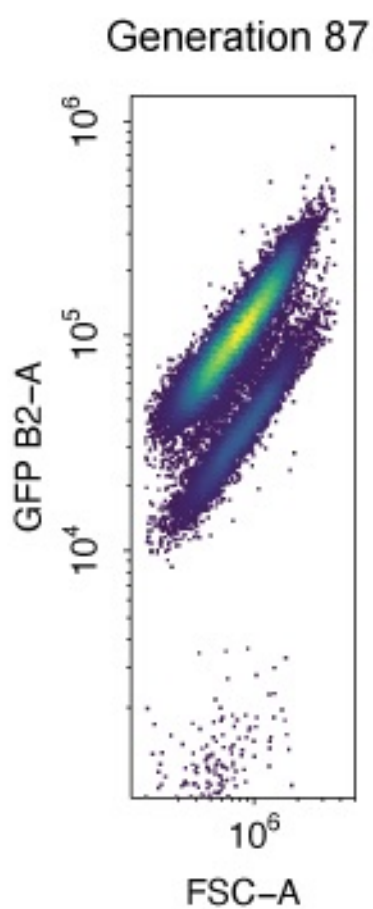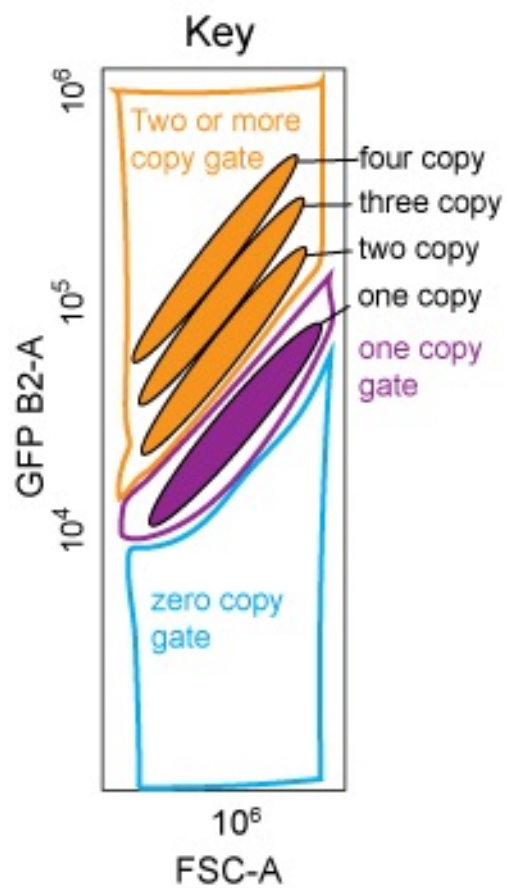

# LTR $\Delta$ population 8

Generation 95

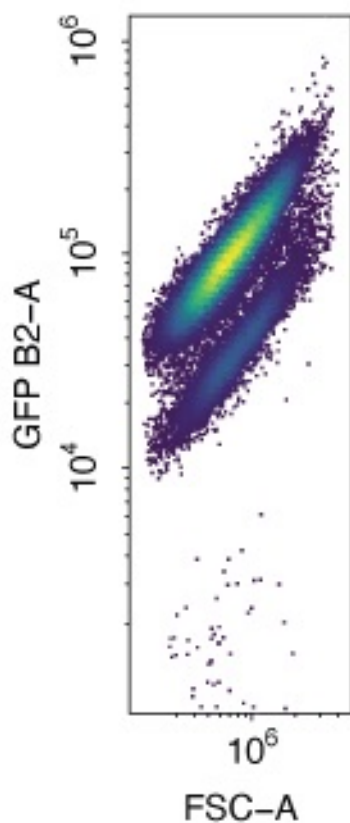

Generation 108

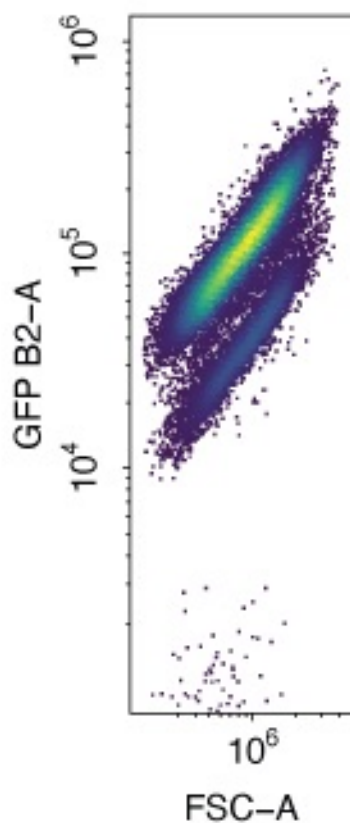

Generation 116

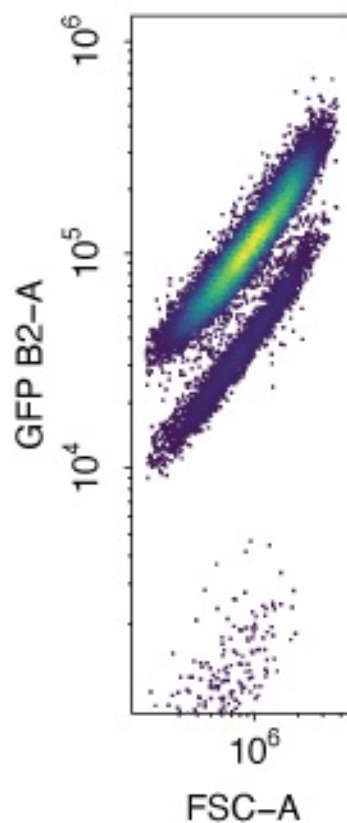

Generation 124

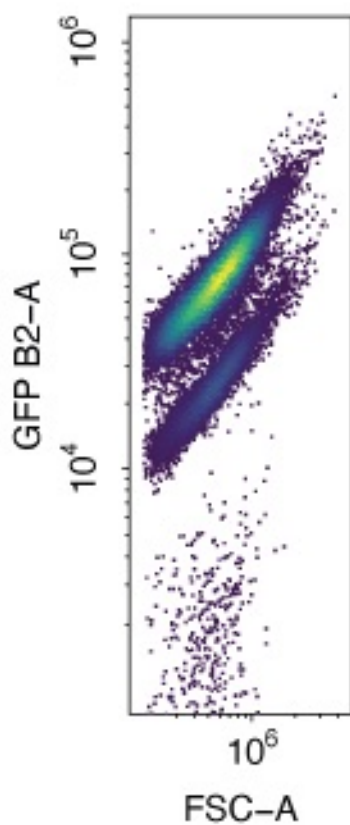

Generation 137

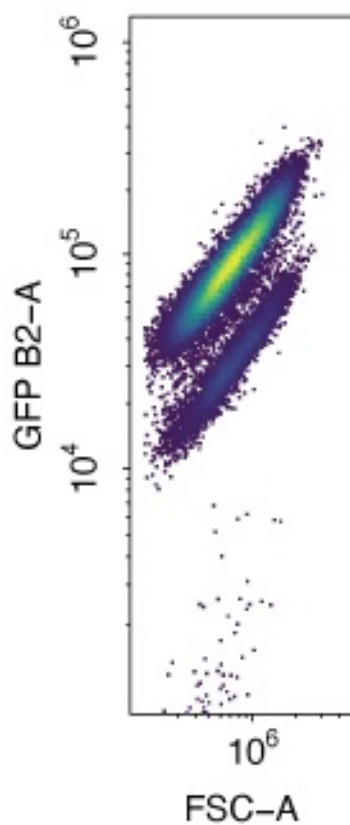

Key

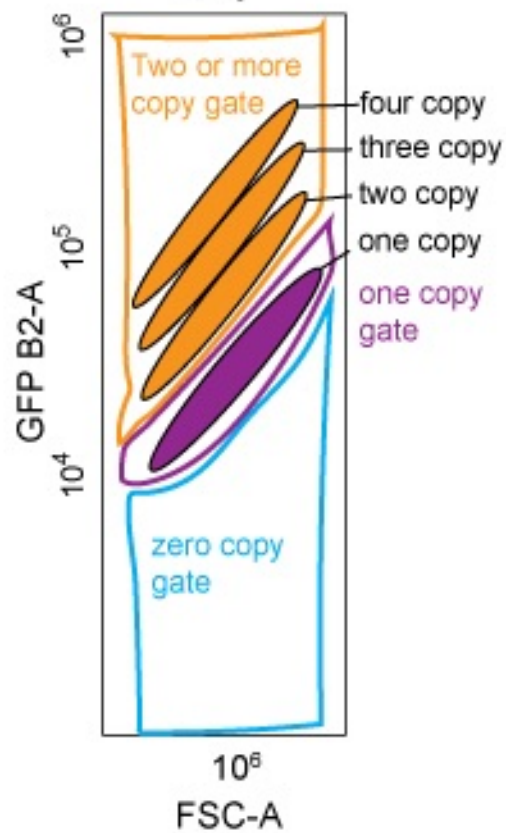

# ARS $\Delta$ population 1

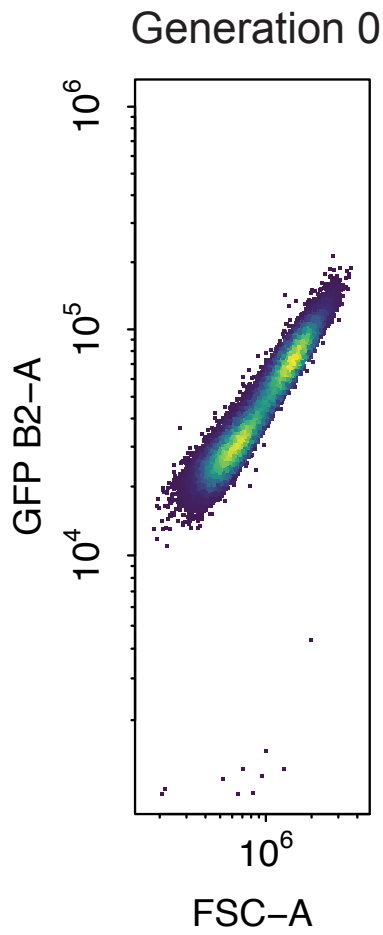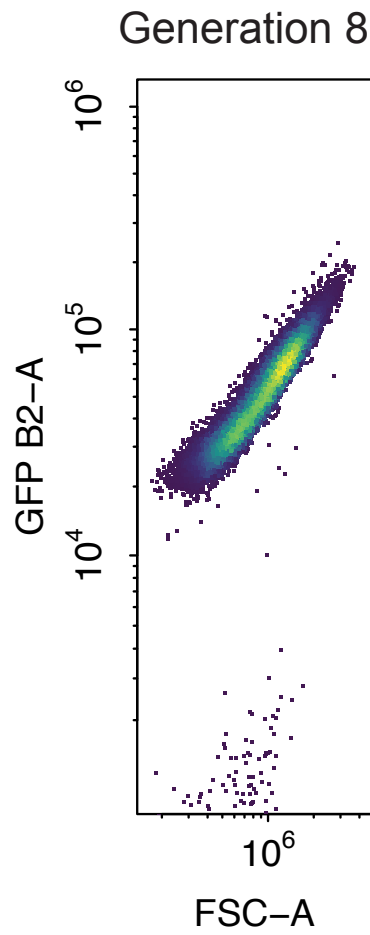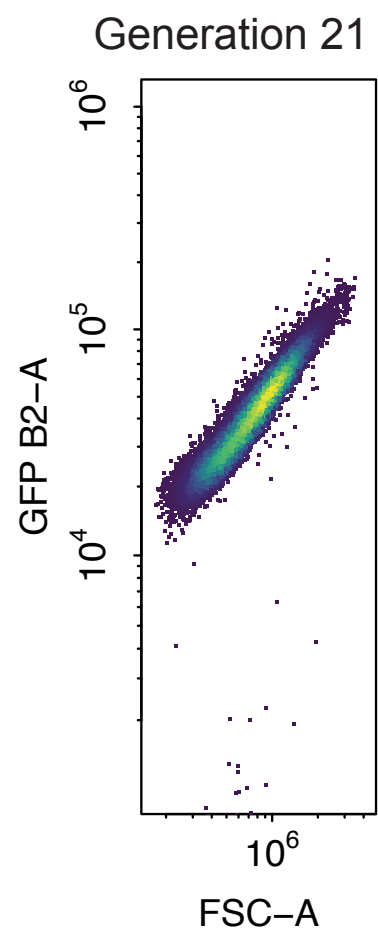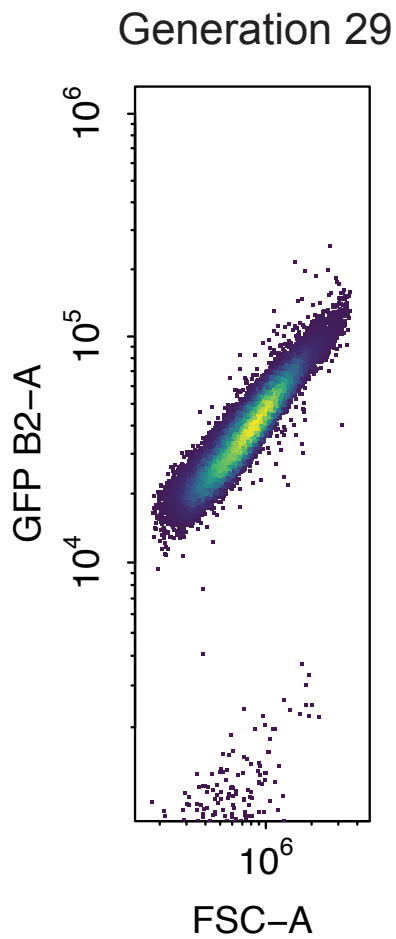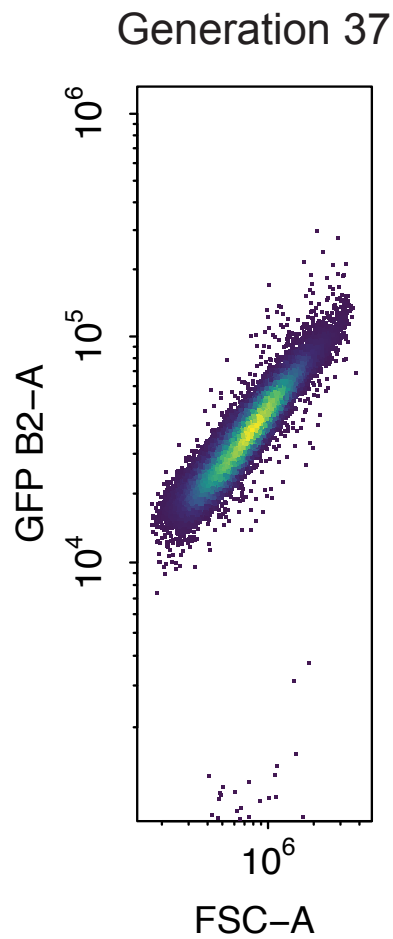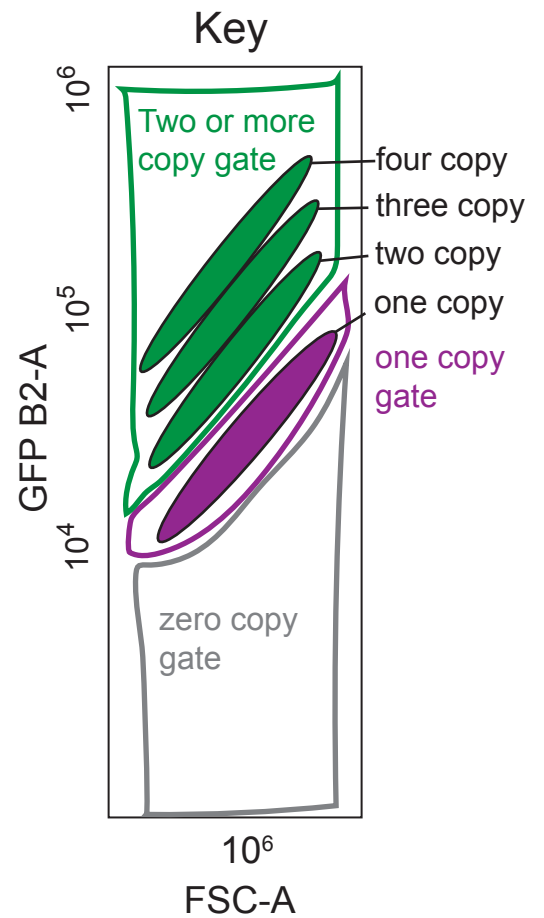

# ARS $\Delta$ population 1

Generation 50

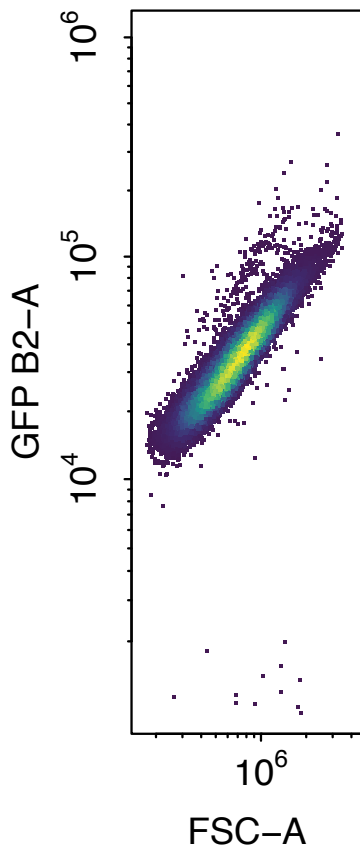

Generation 58

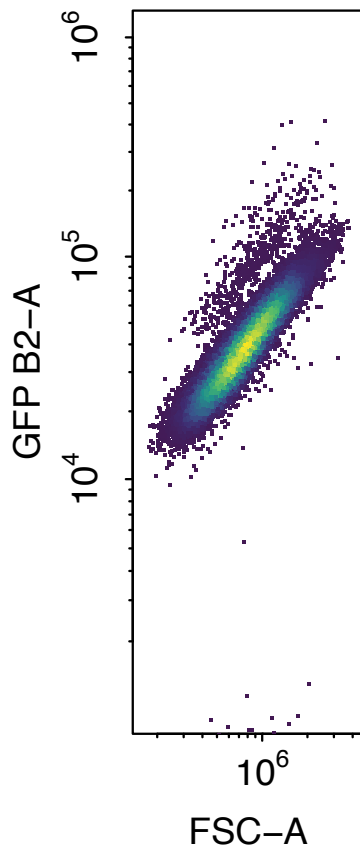

Generation 66

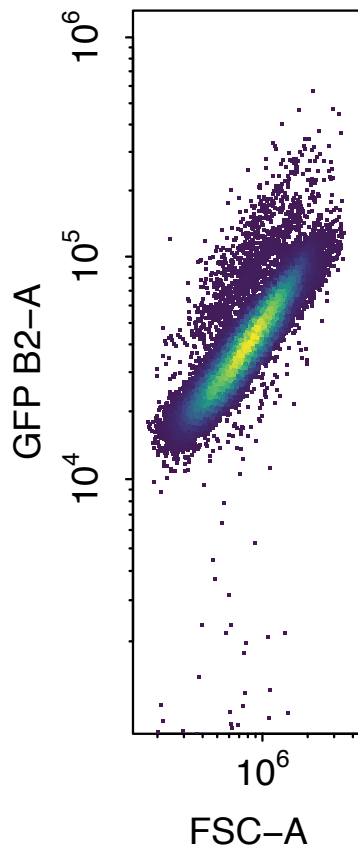

Generation 79

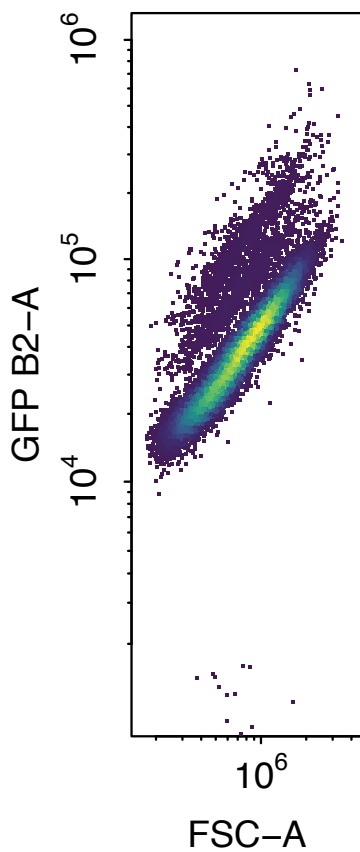

Generation 87

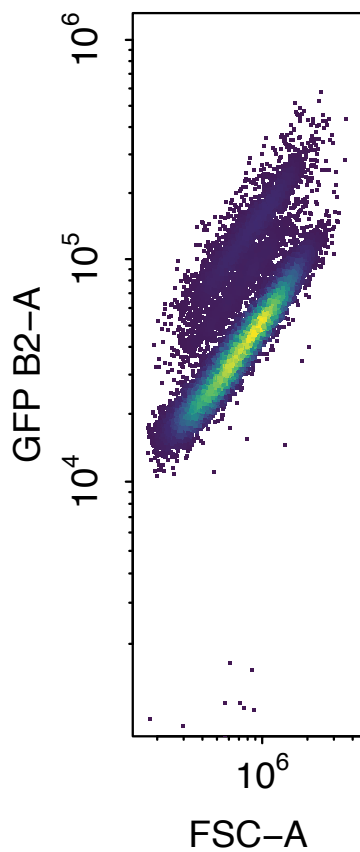

Key



# ARS $\Delta$ population 1

Generation 95

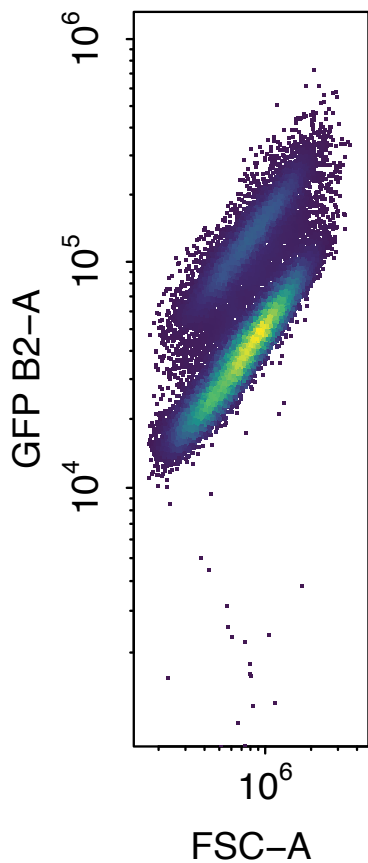

Generation 108

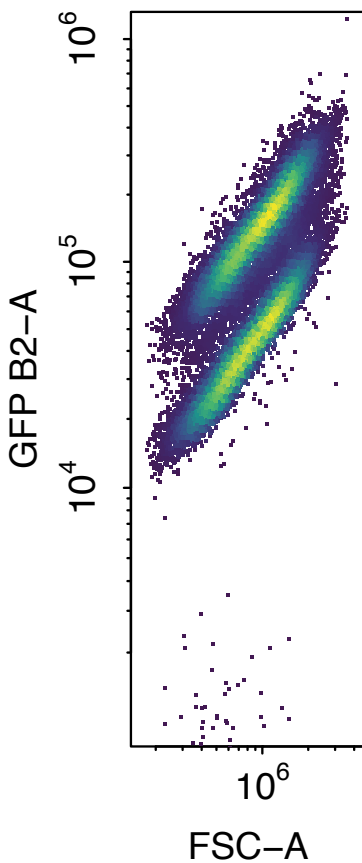

Generation 116

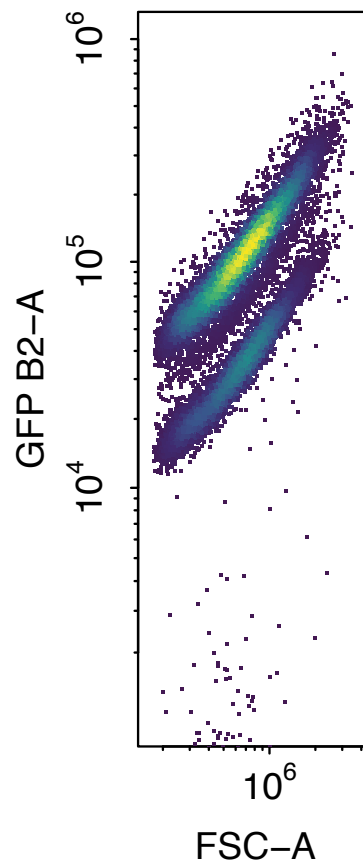

Generation 124

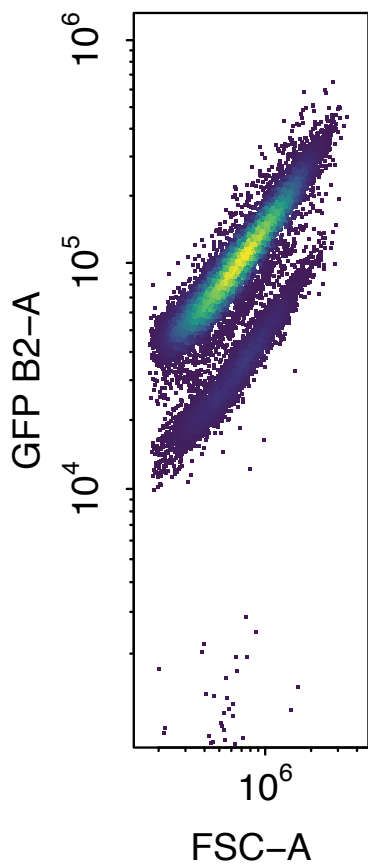

Generation 137

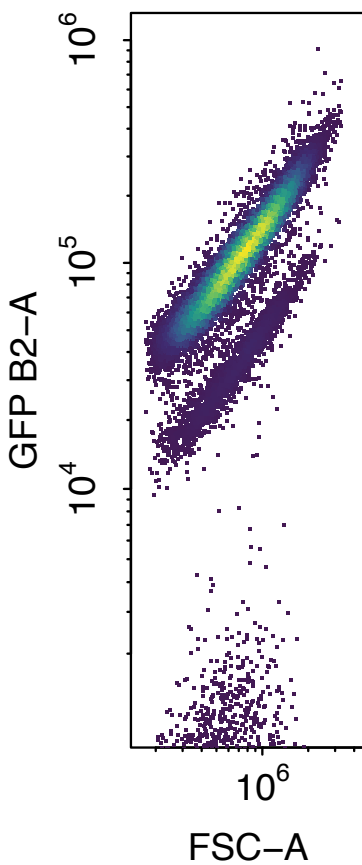

Key

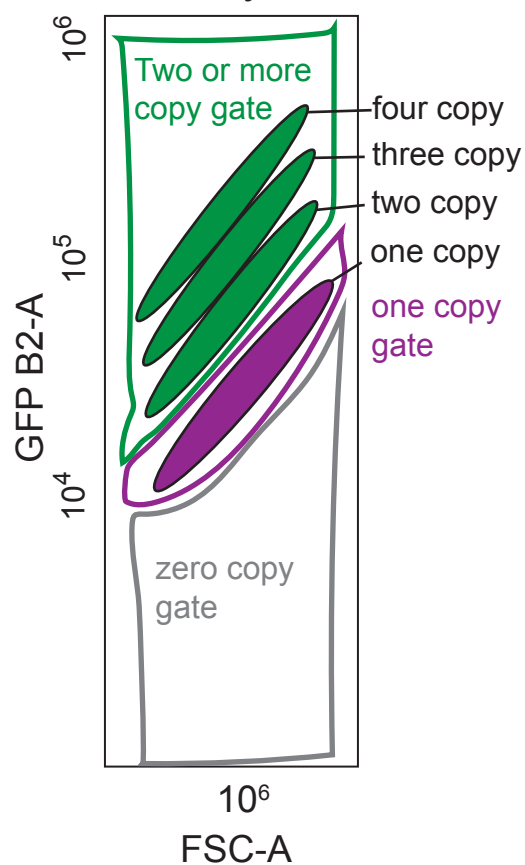

# ARS $\Delta$ population 3

Generation 0

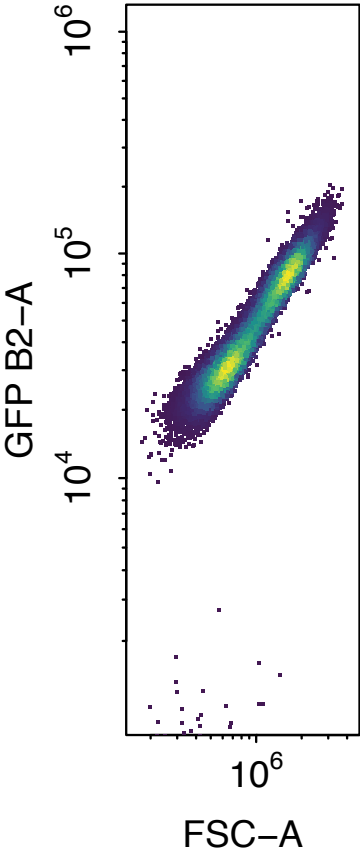

Generation 8

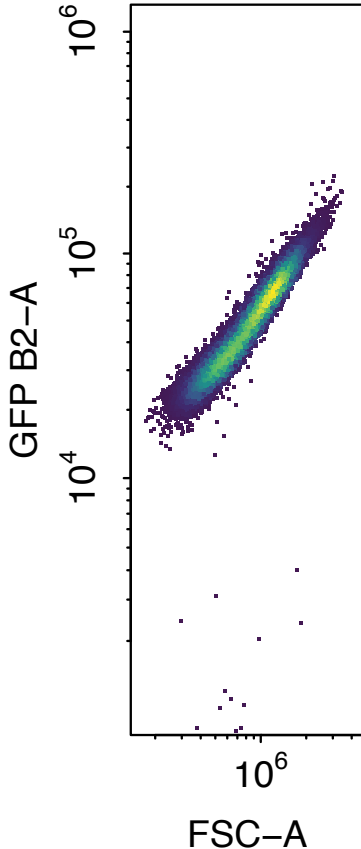

Generation 21

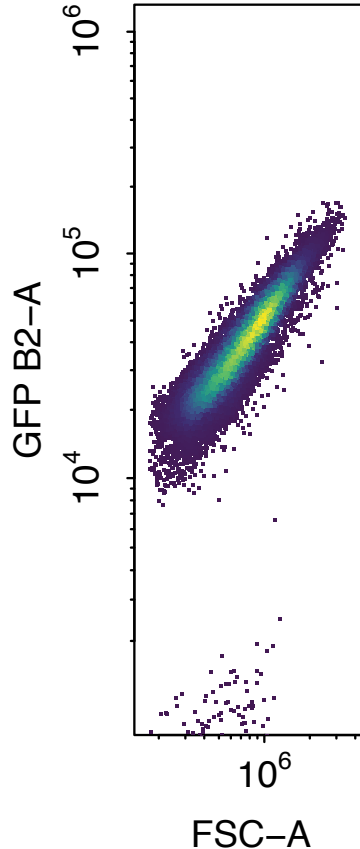

Generation 29

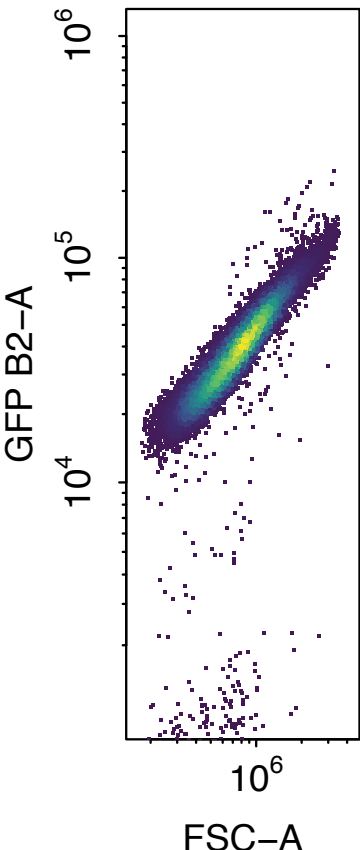

Generation 37

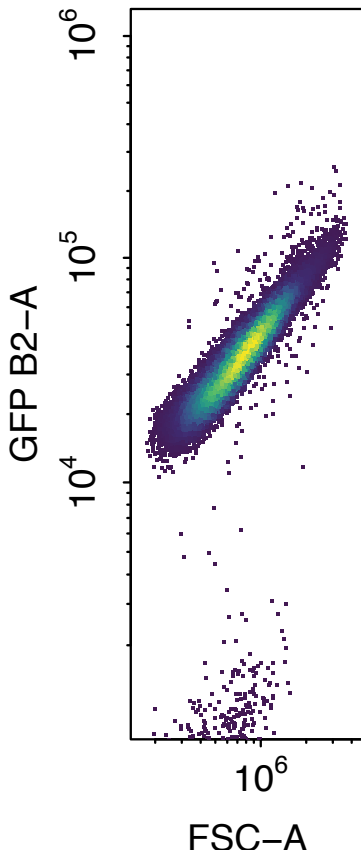

Key

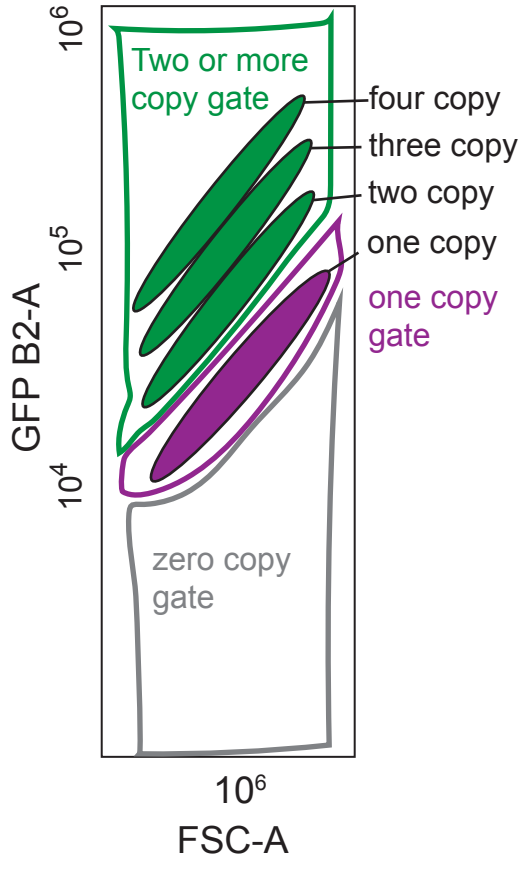



# ARS $\Delta$ population 3

Generation 50

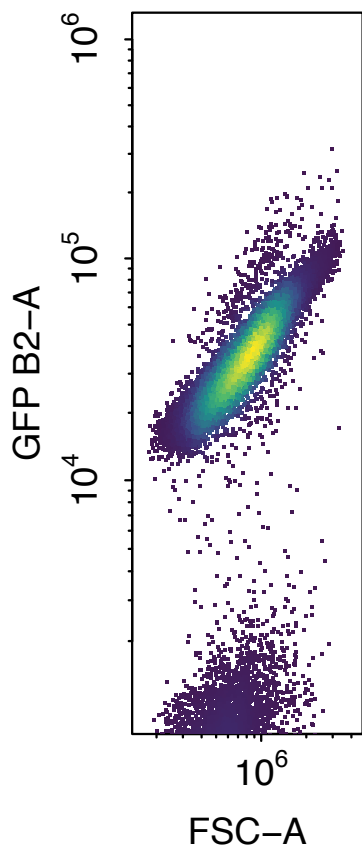

Generation 58

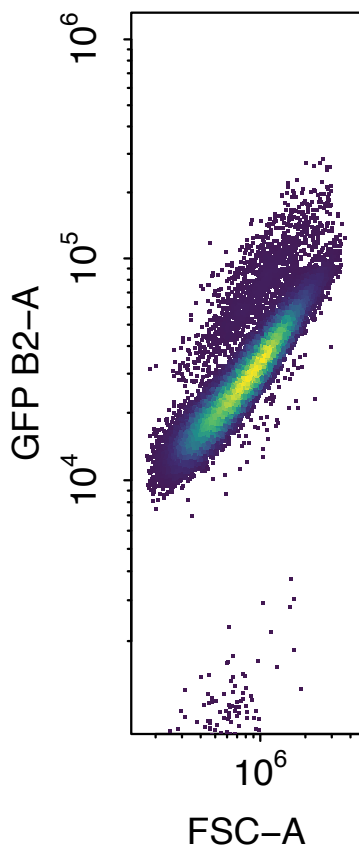

Generation 66

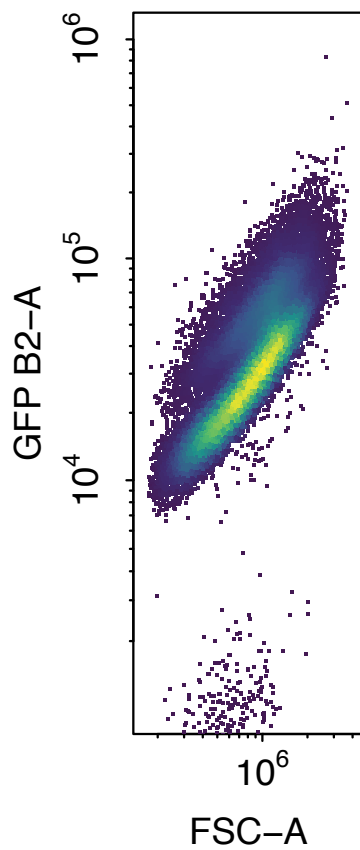

Generation 79

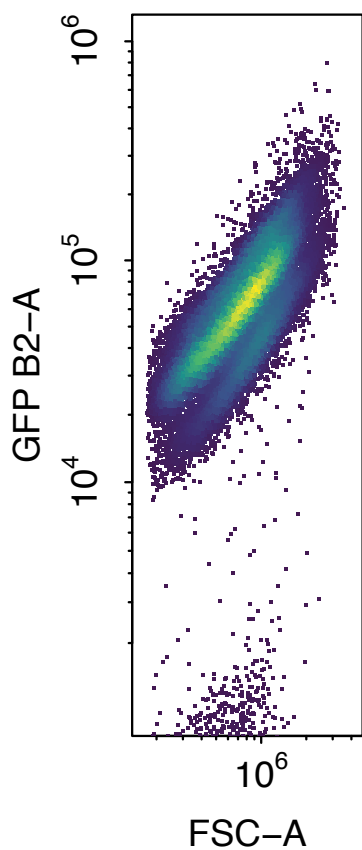

Generation 87

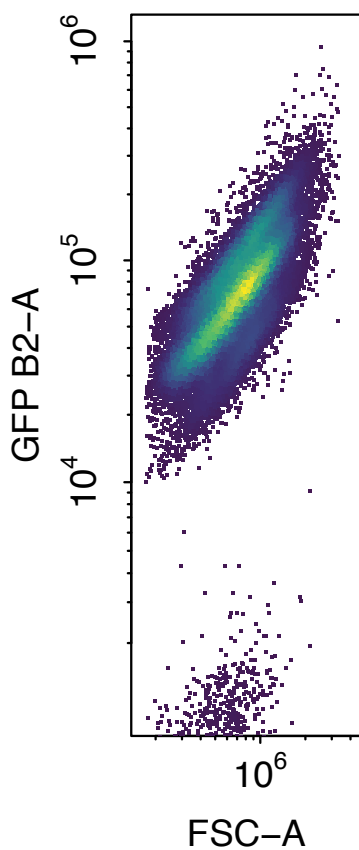

Key

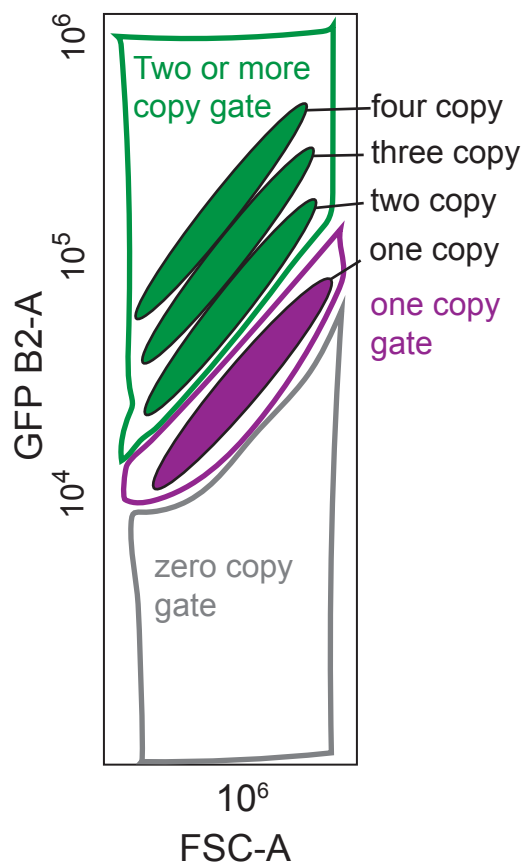

# ARS $\Delta$ population 3

Generation 95

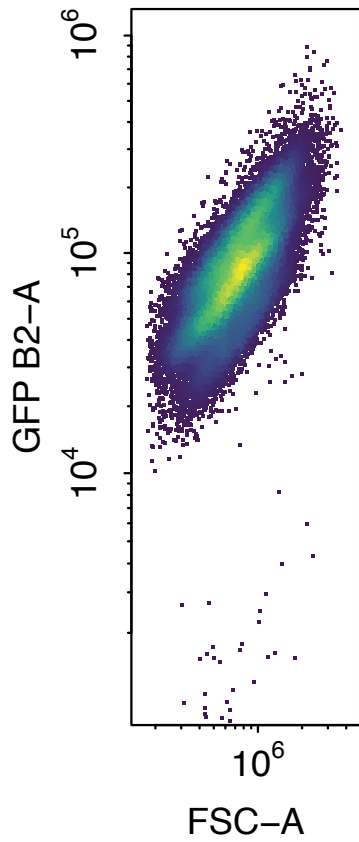

Generation 108

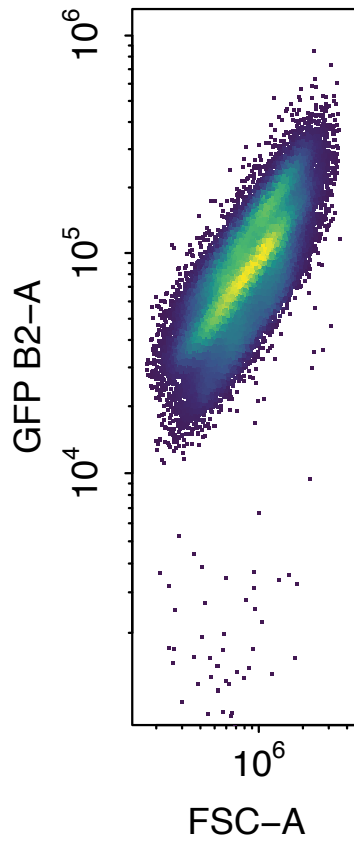

Generation 116

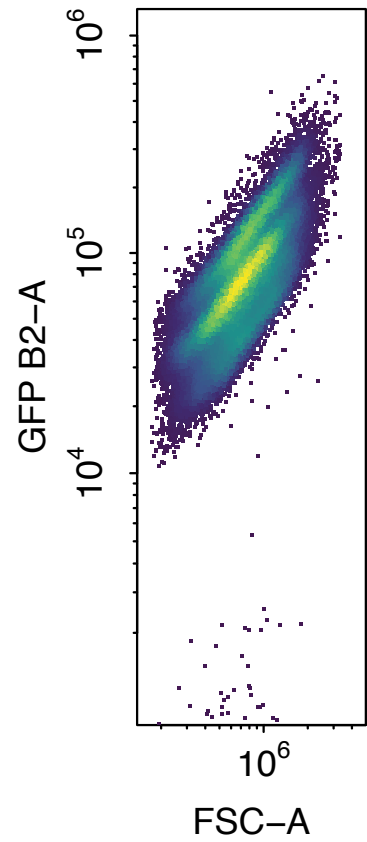

Generation 124

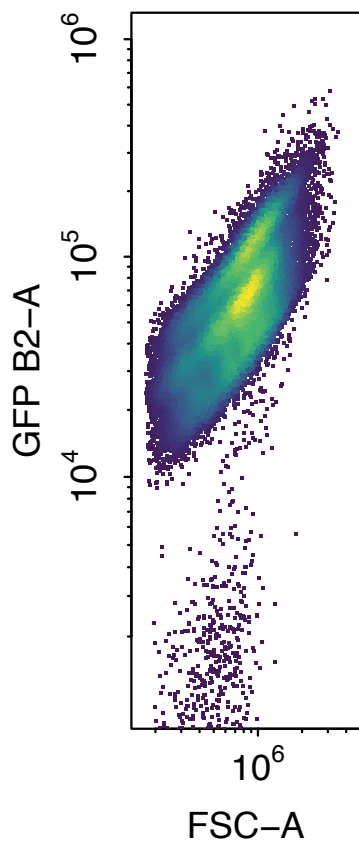

Generation 137

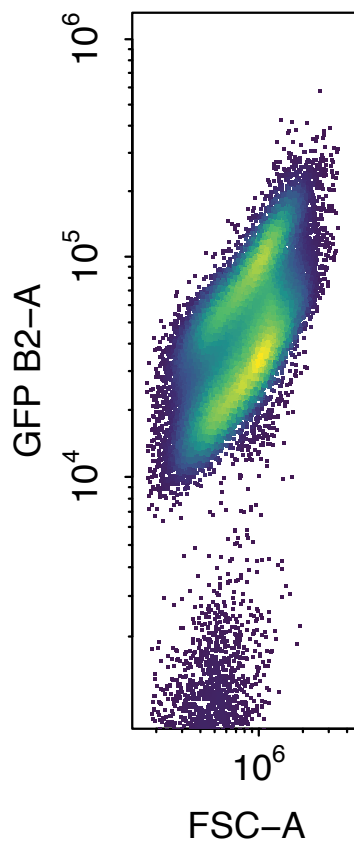

Key

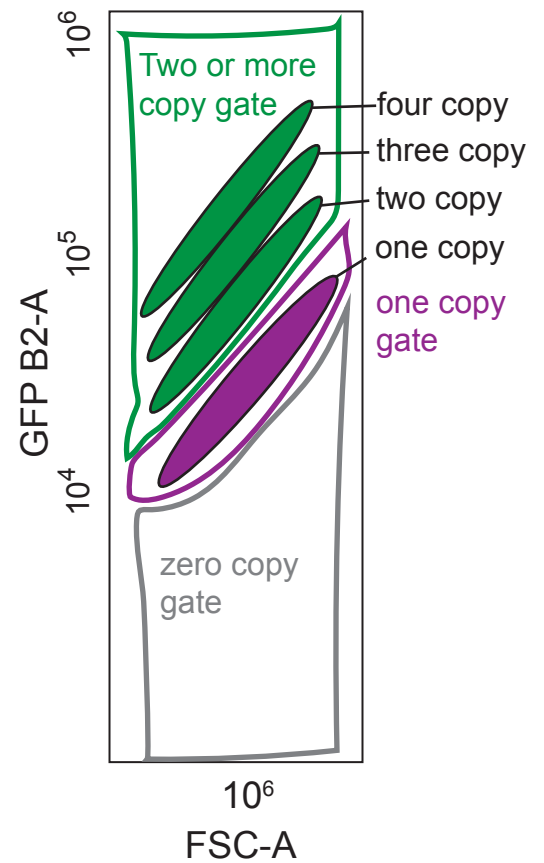

# ARS $\Delta$ population 4

Generation 0

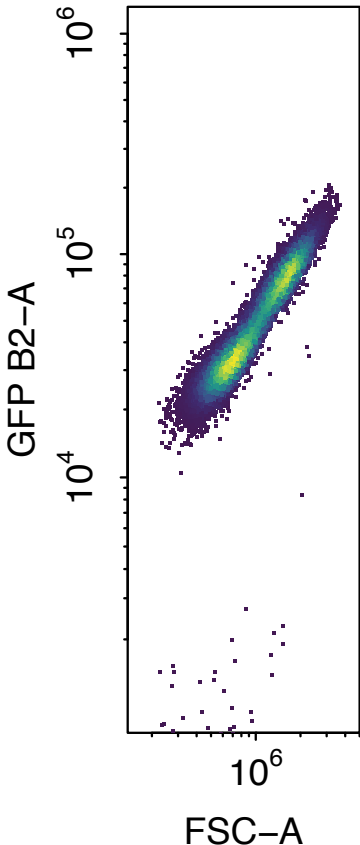

Generation 8

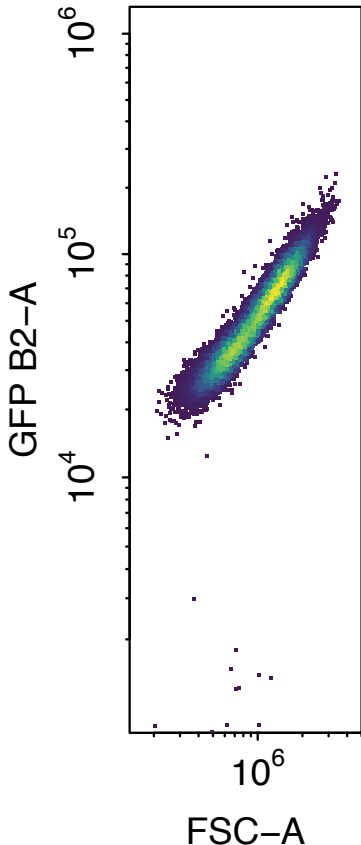

Generation 21

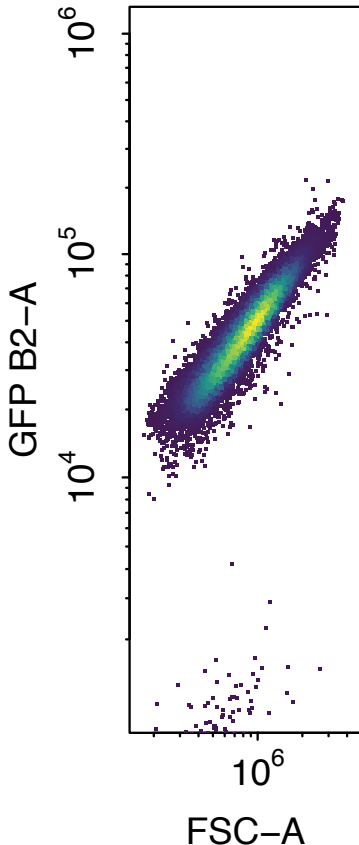

Generation 29

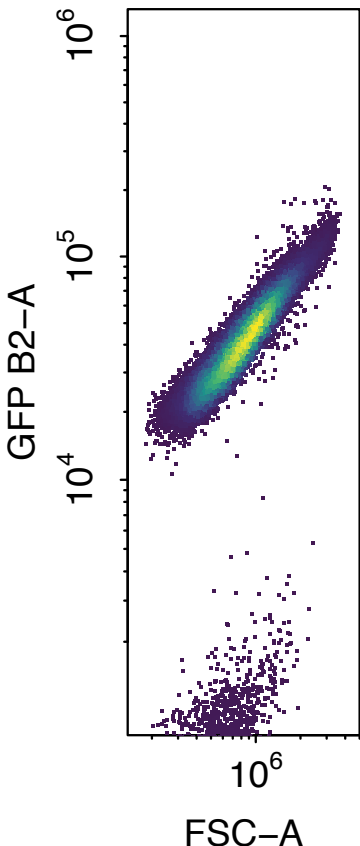

Generation 37

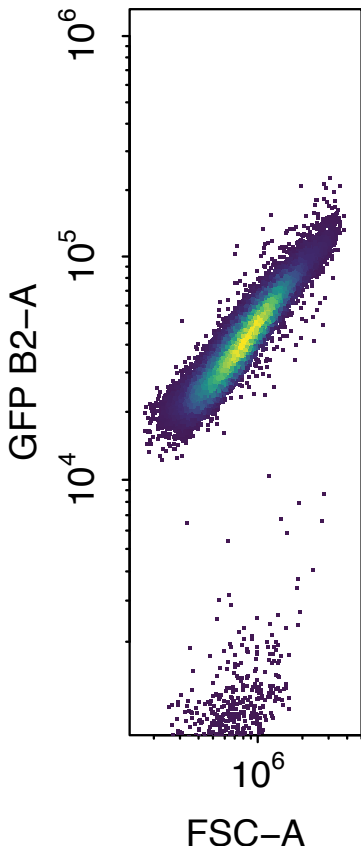

Key

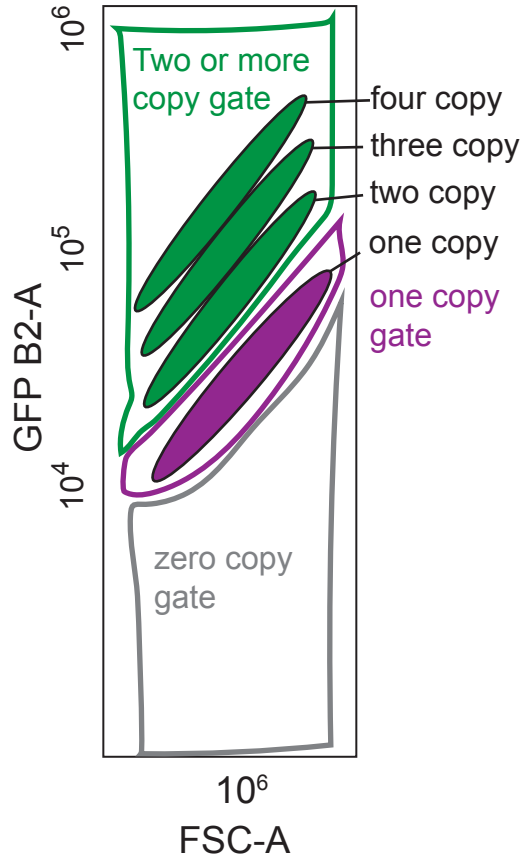

# ARS $\Delta$ population 4

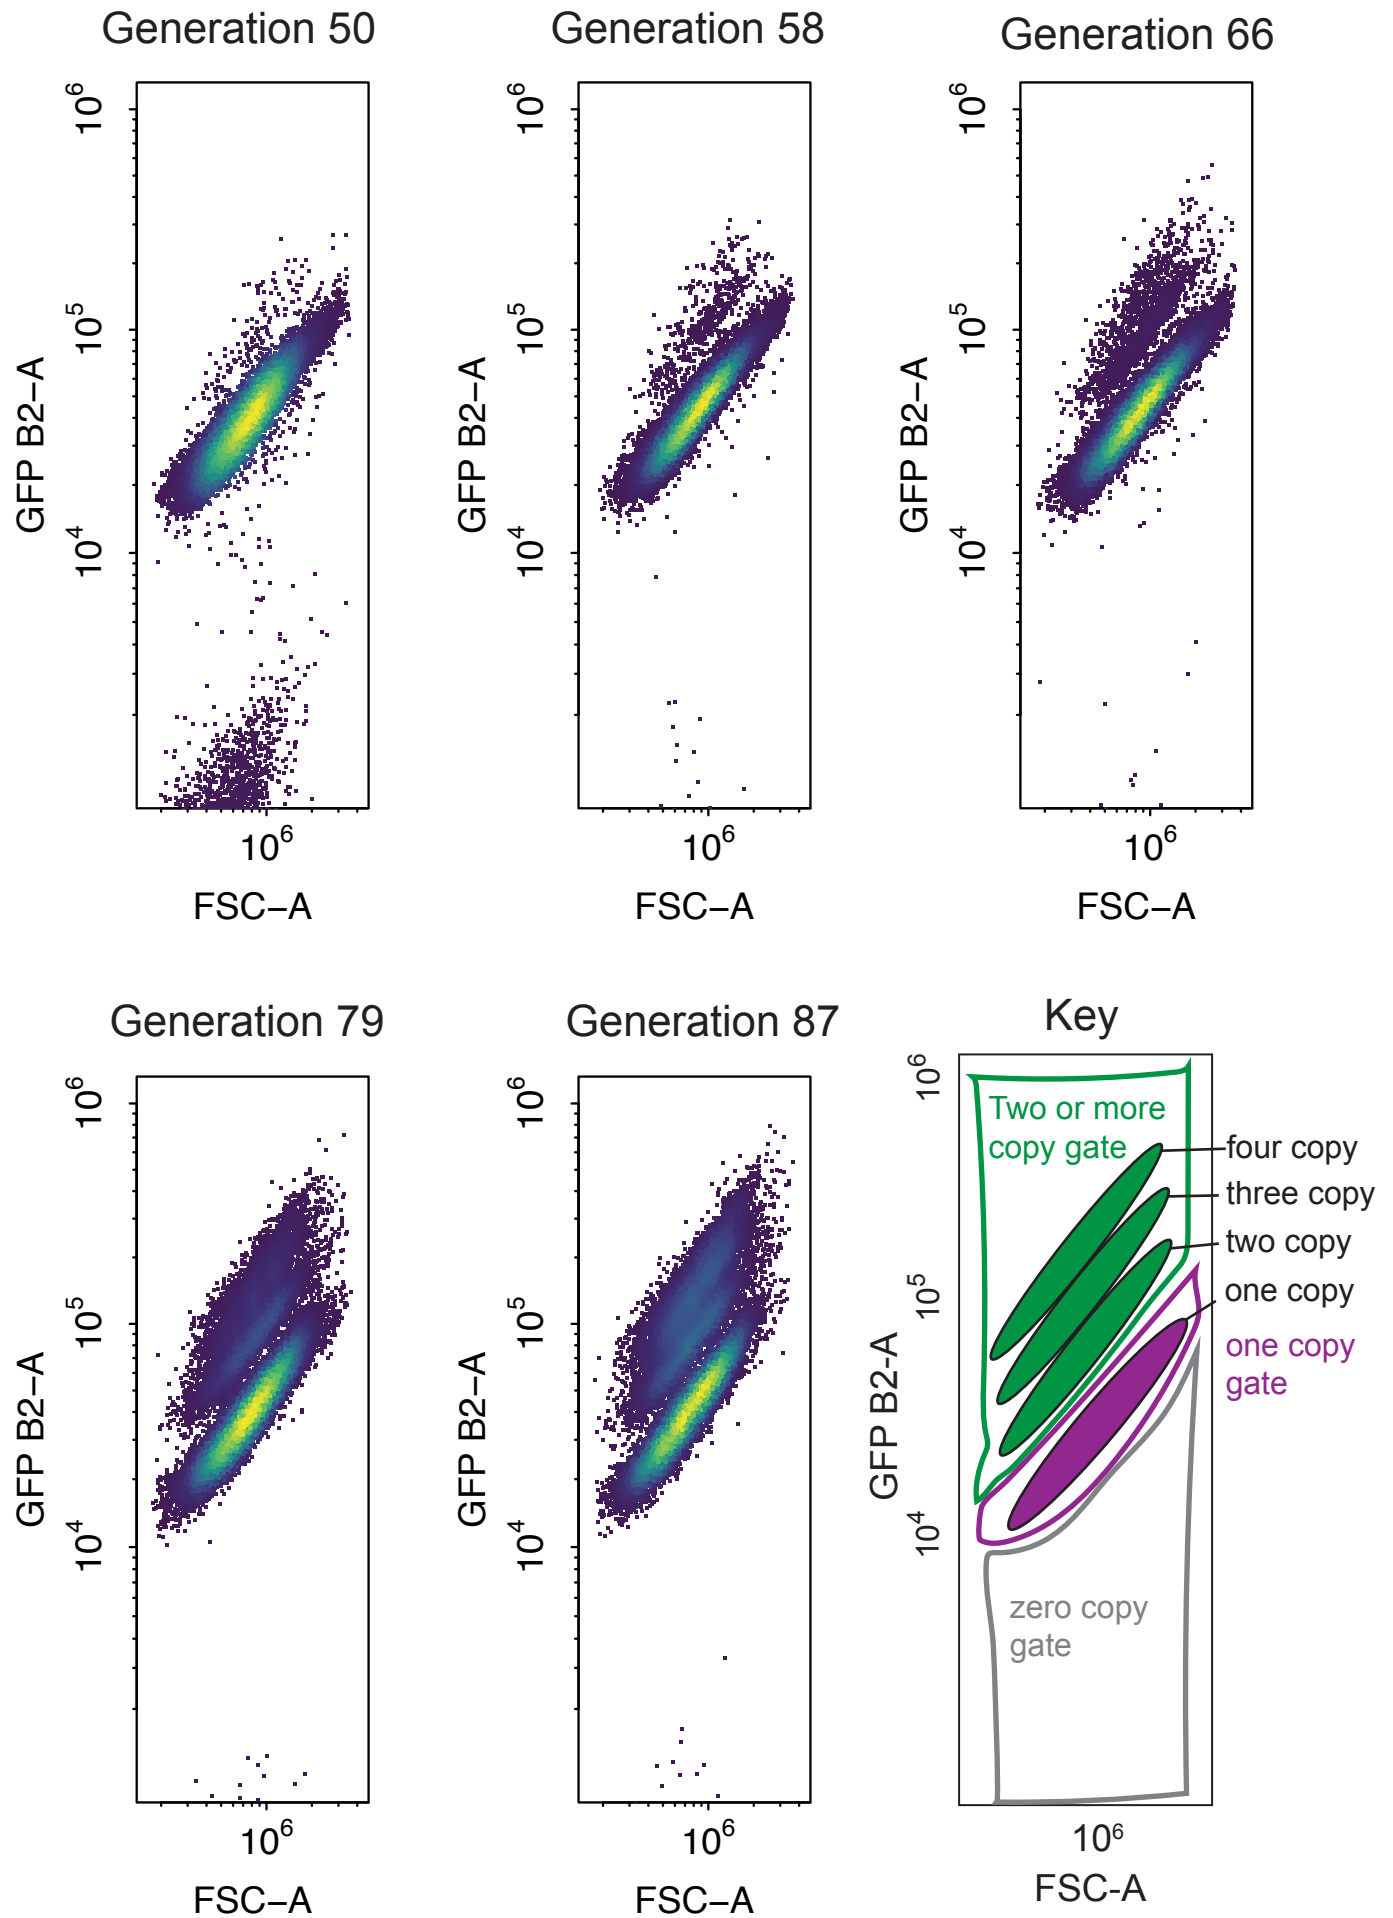

# ARS $\Delta$ population 4

Generation 95

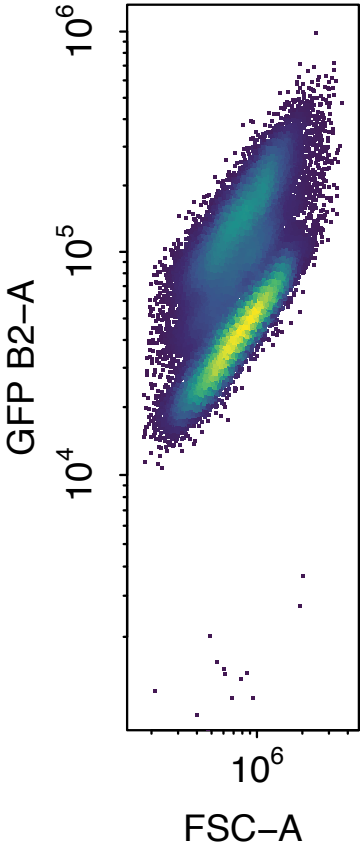

Generation 108

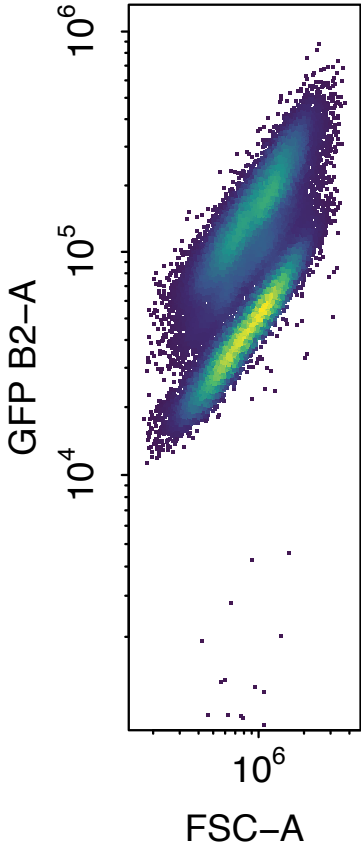

Generation 116

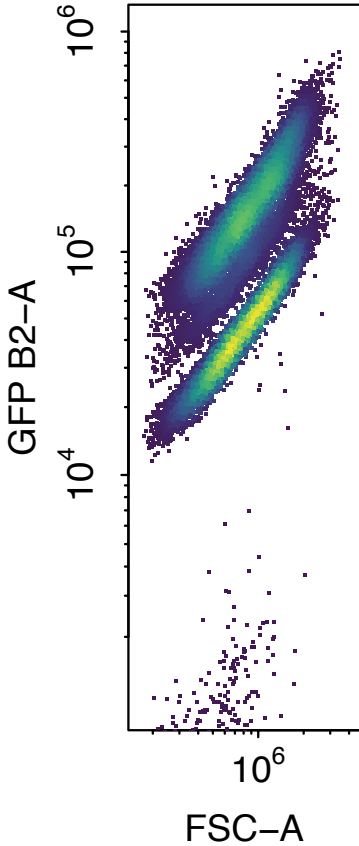

Generation 124

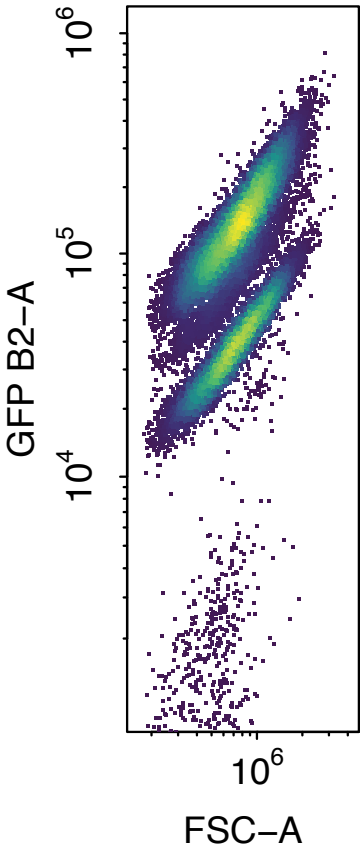

Generation 137

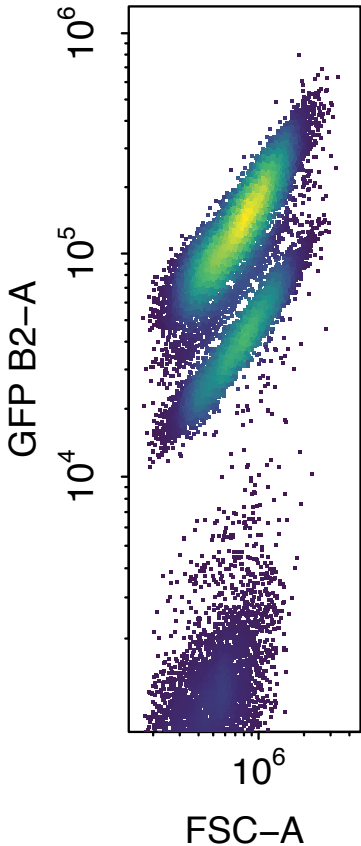

Key

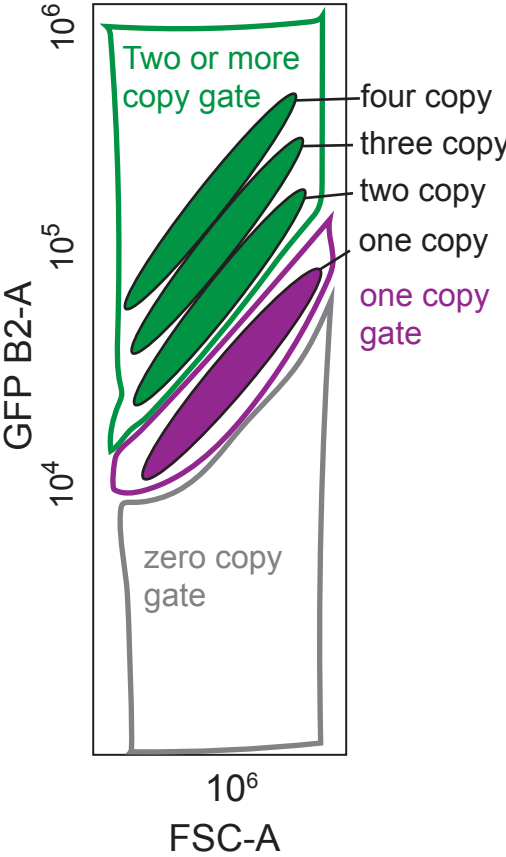

# ARS $\Delta$ population 5

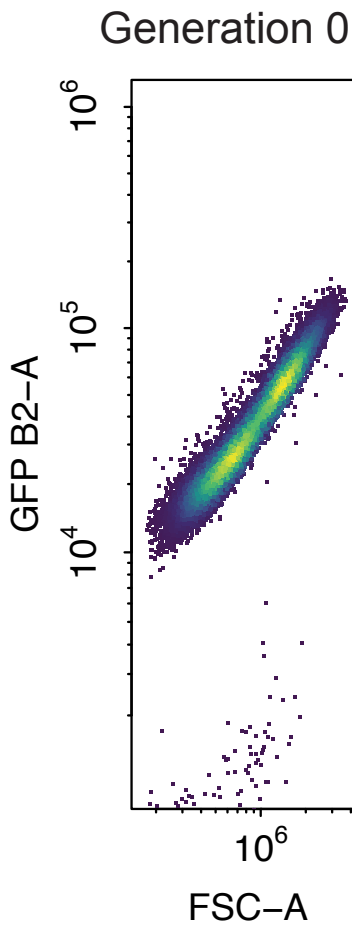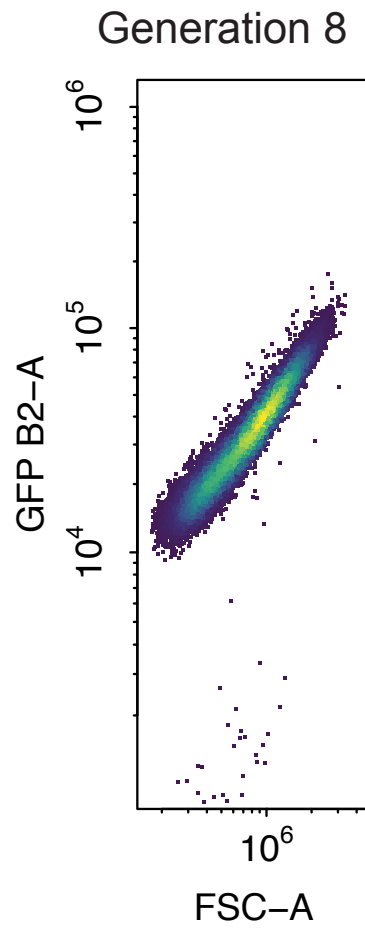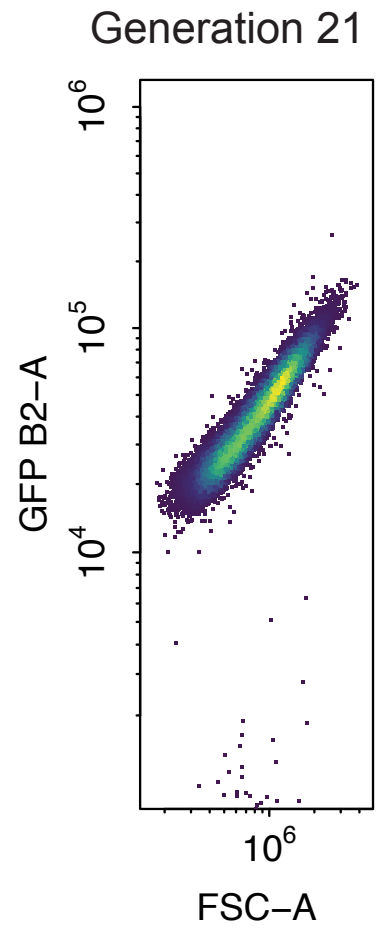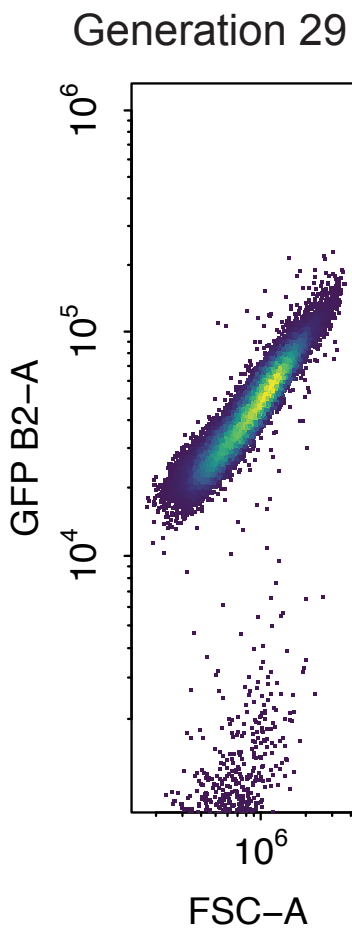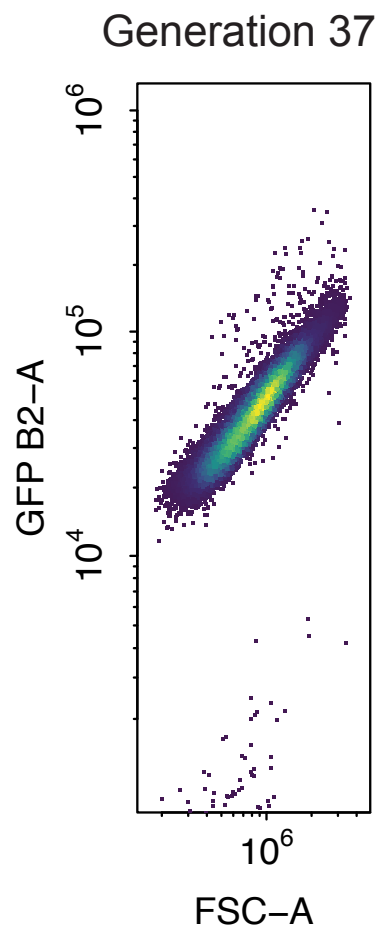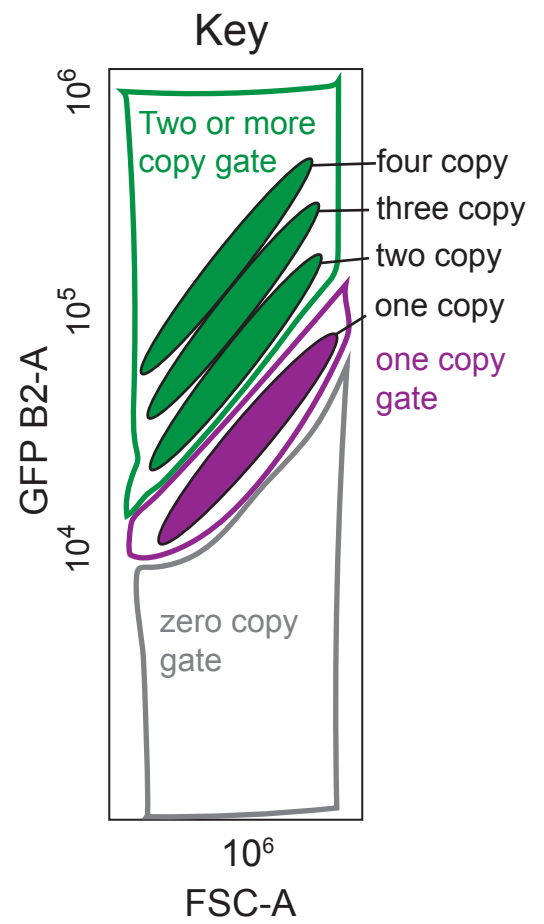

# ARS $\Delta$ population 5

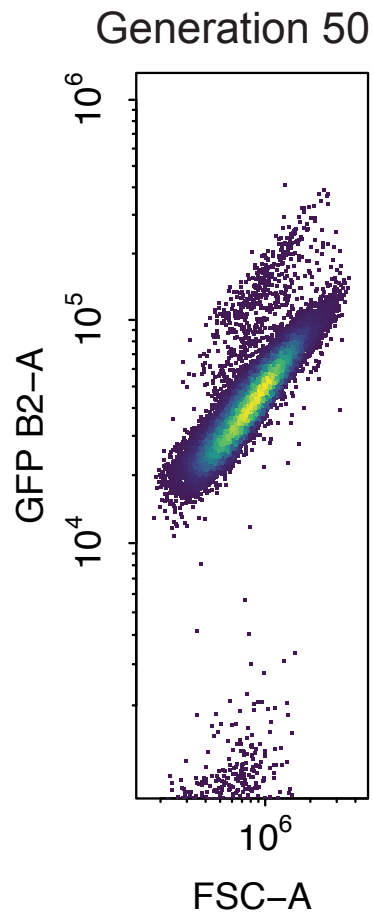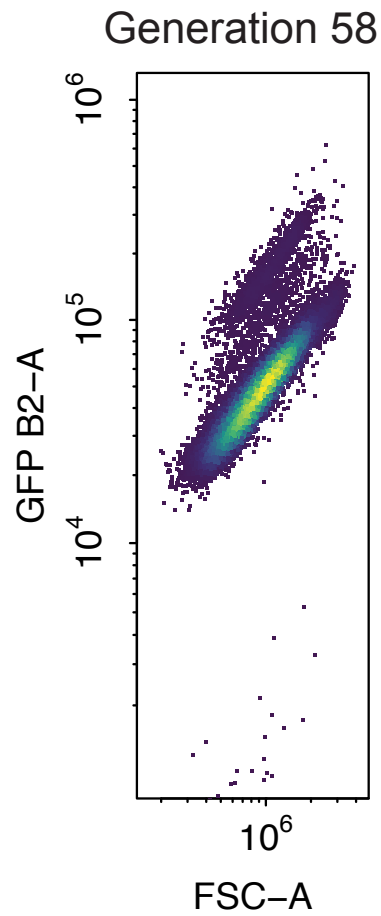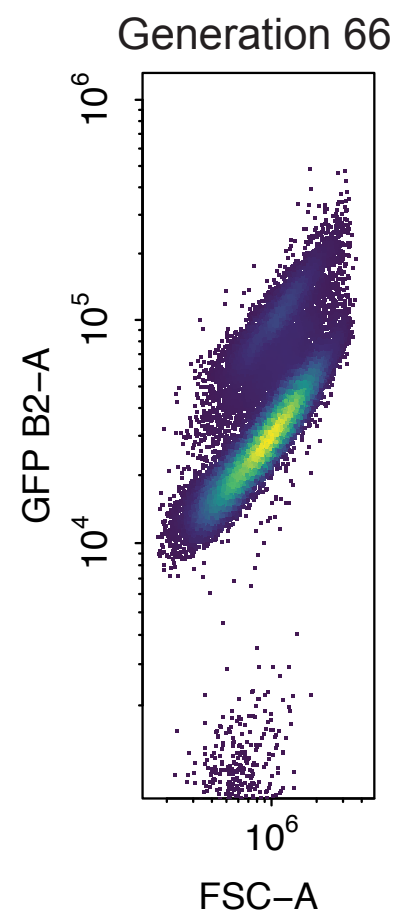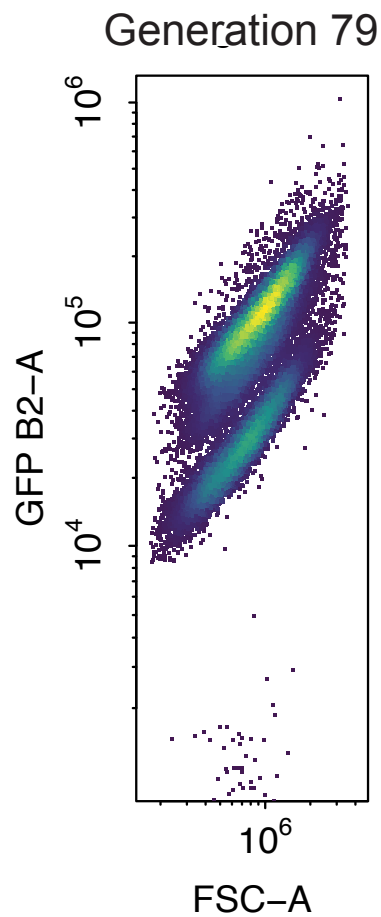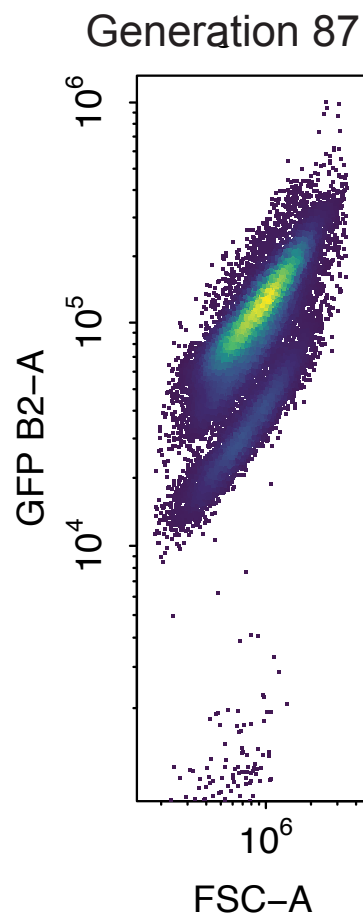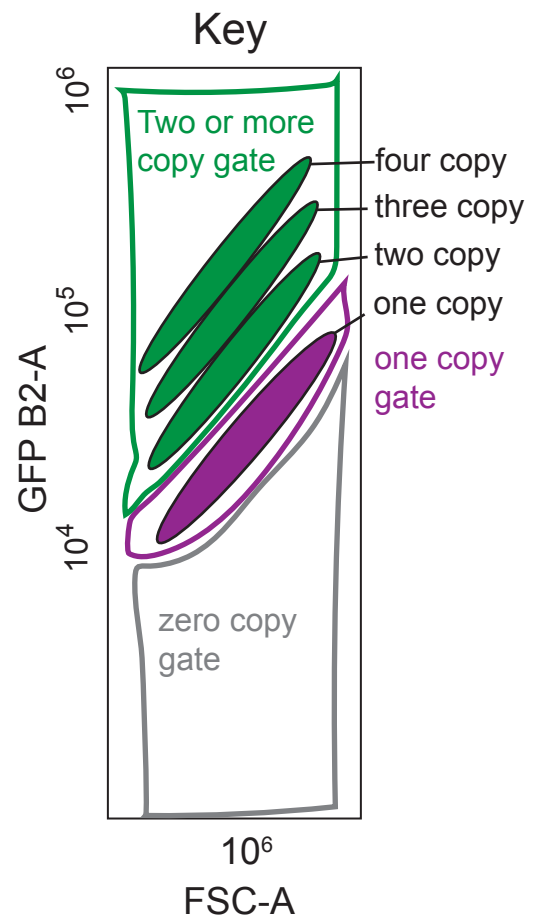

# ARS $\Delta$ population 5

Generation 95

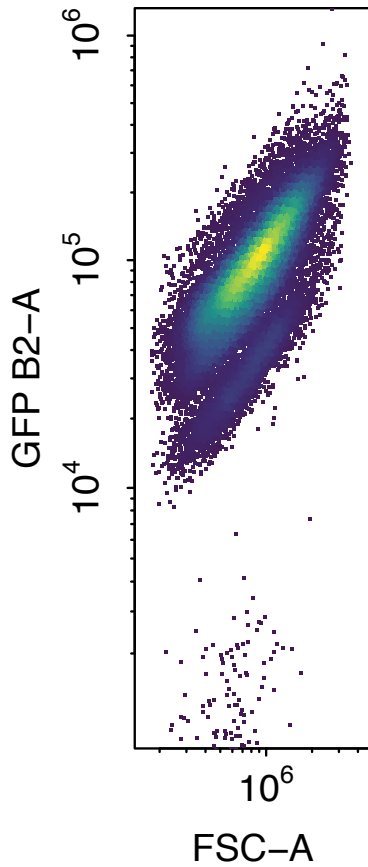

Generation 108

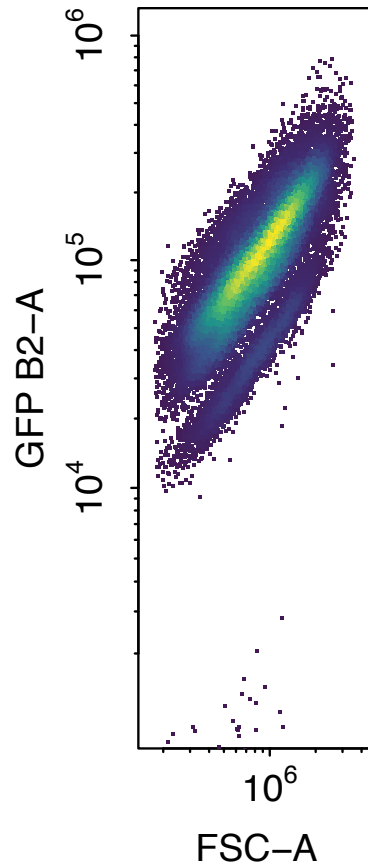

Generation 116

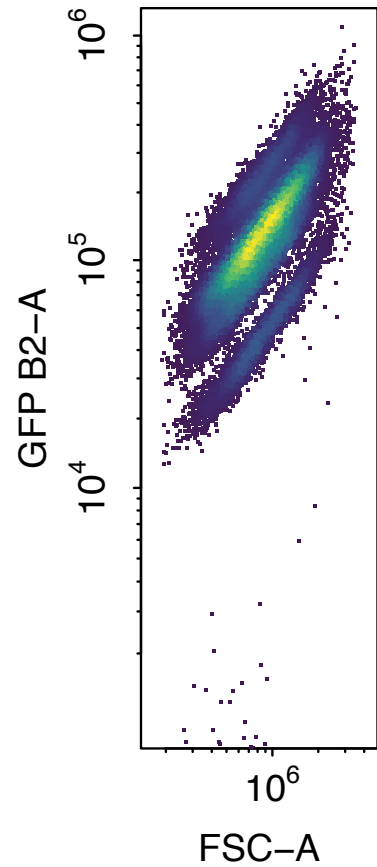

Generation 124

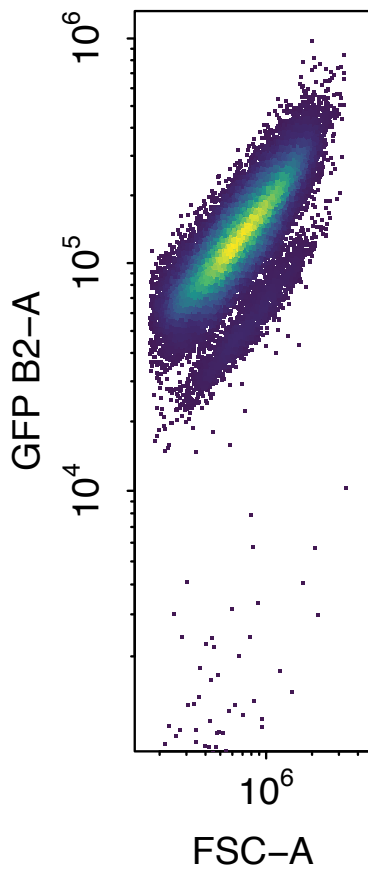

Generation 137

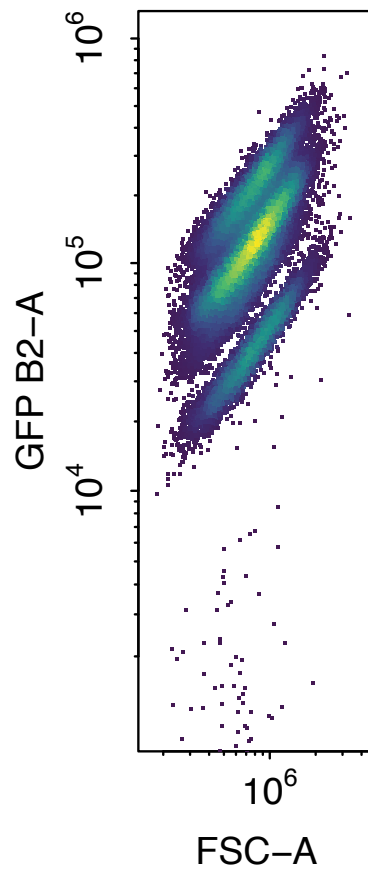

Key

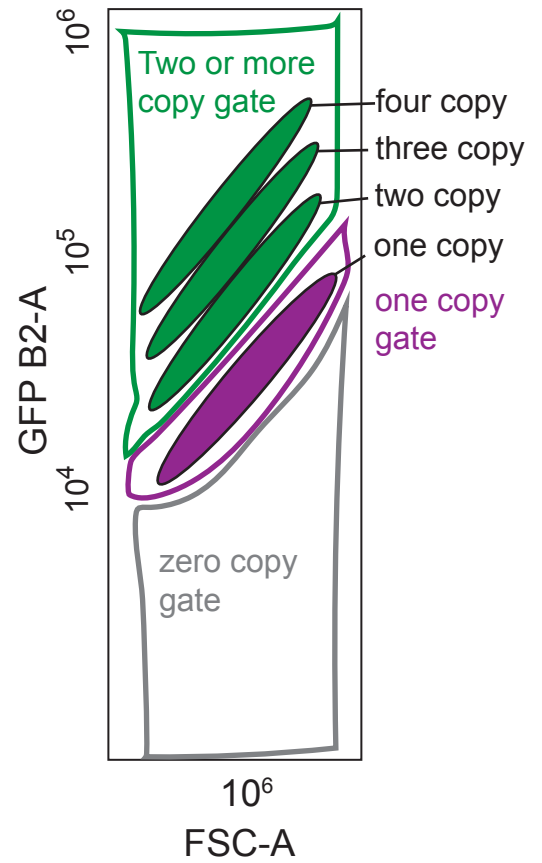



# ARS $\Delta$ population 6

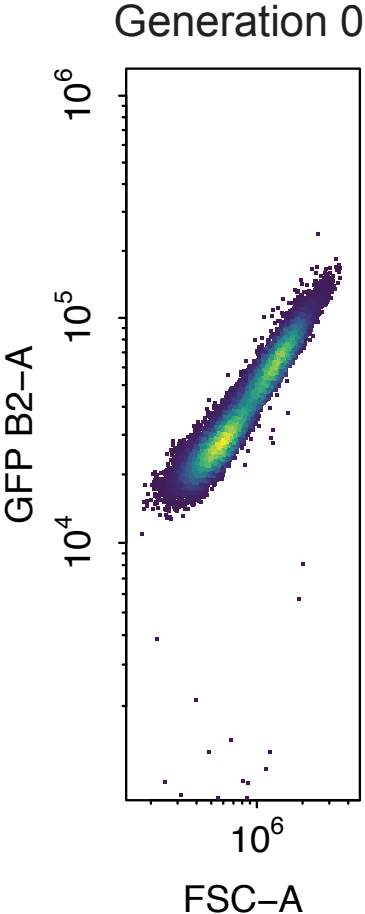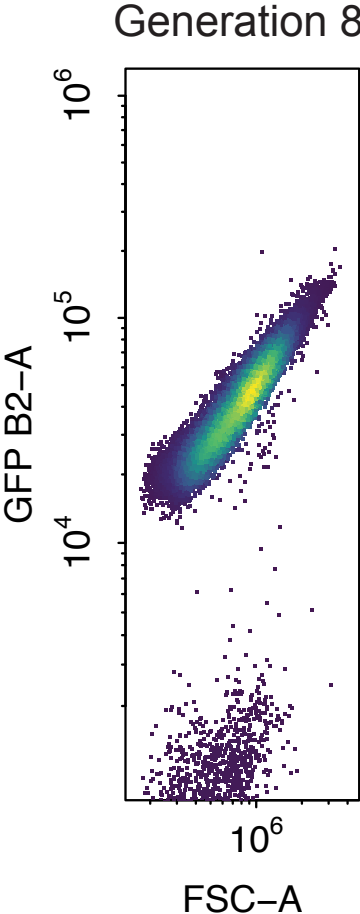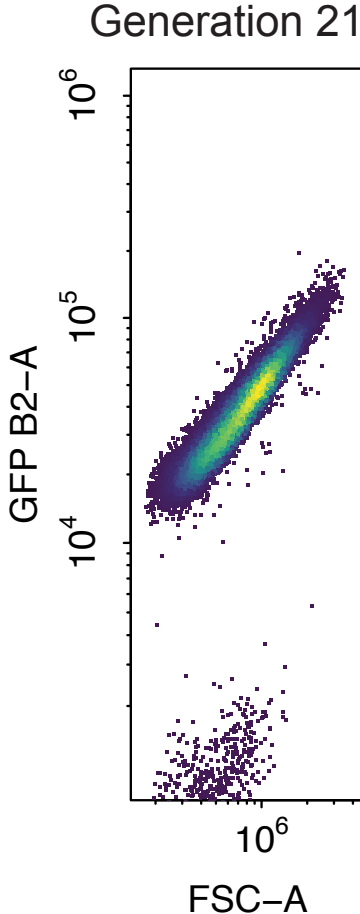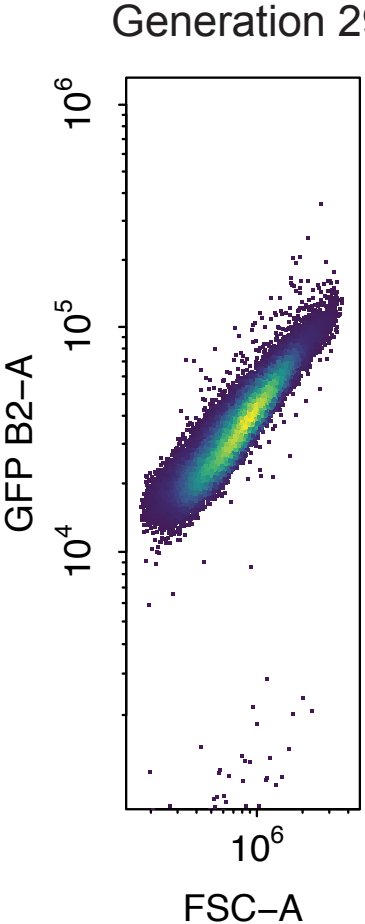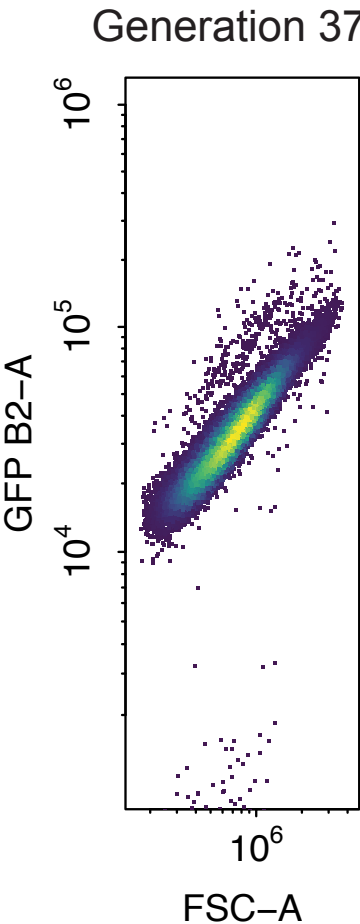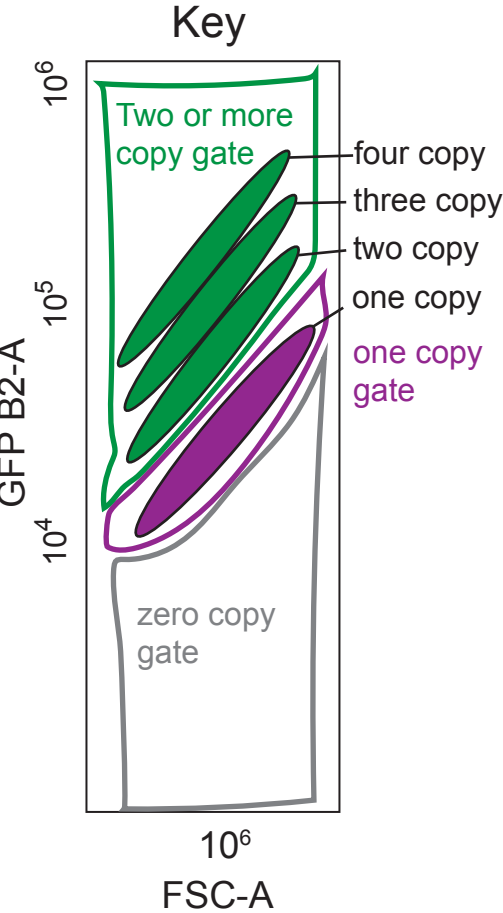

# ARS $\Delta$ population 6

Generation 50

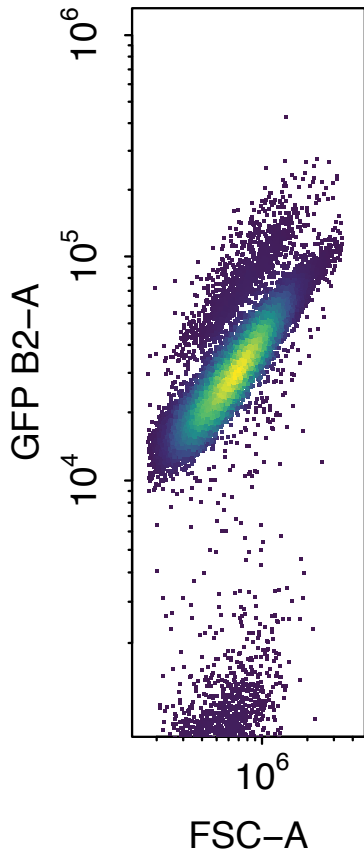

Generation 58

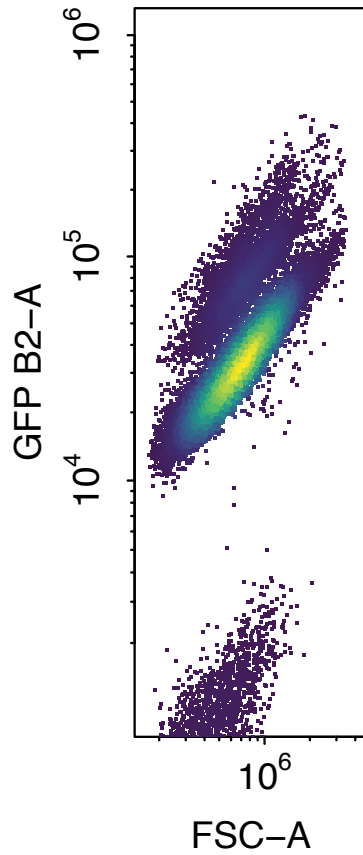

Generation 66

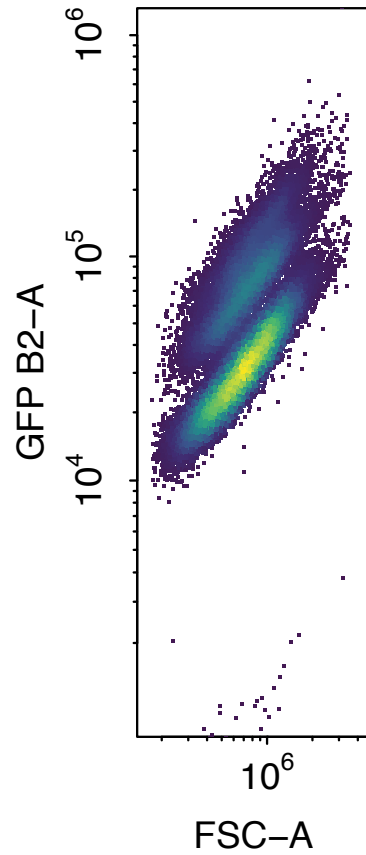

Generation 79

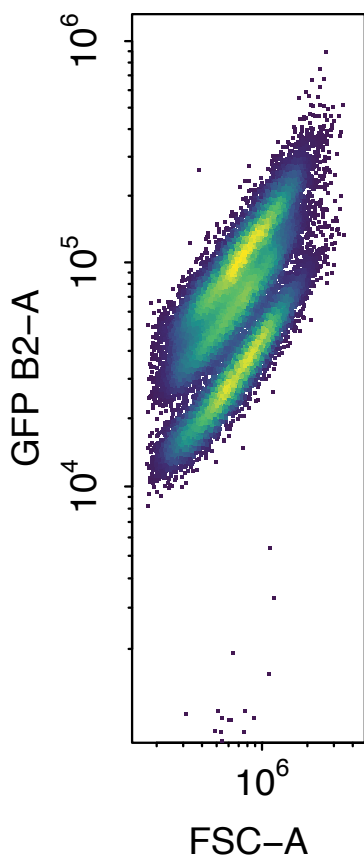

Generation 87

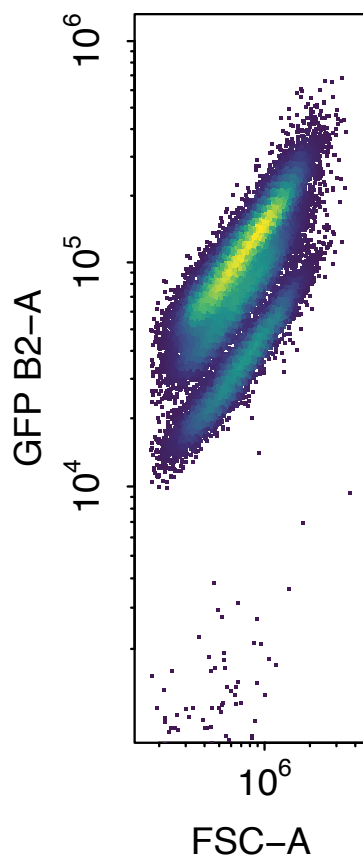

Key

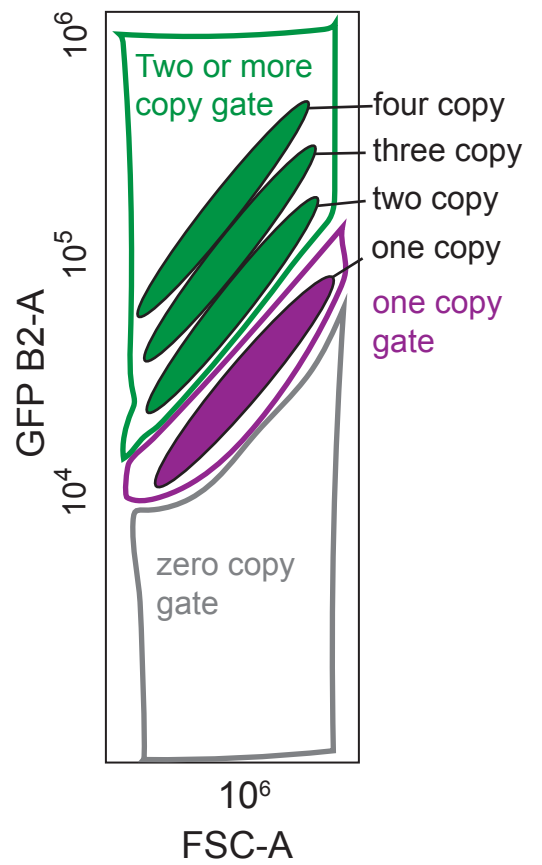

# ARS $\Delta$ population 6

Generation 95

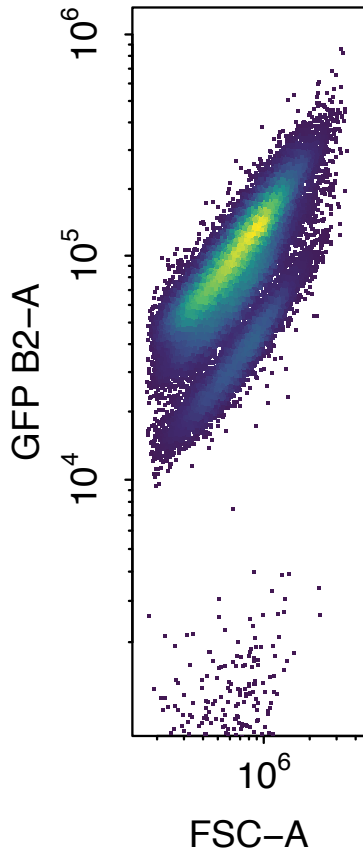

Generation 108

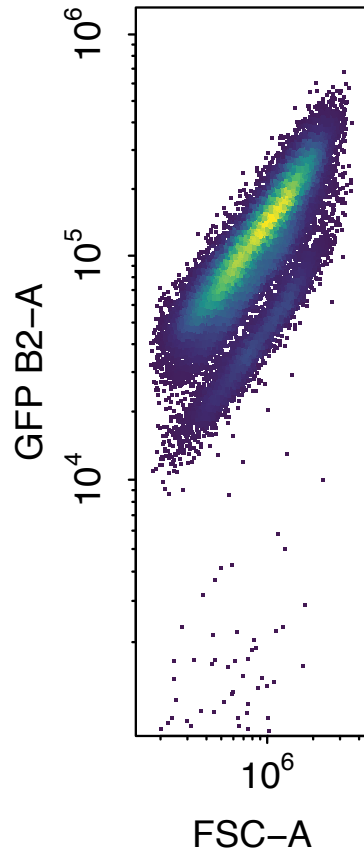

Generation 116

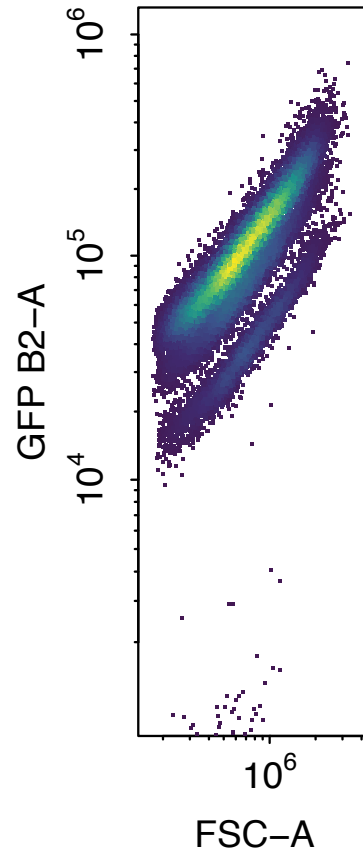

Generation 124

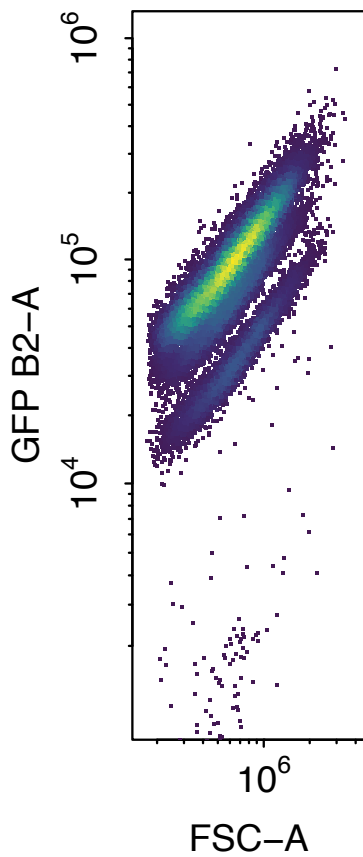

Generation 137

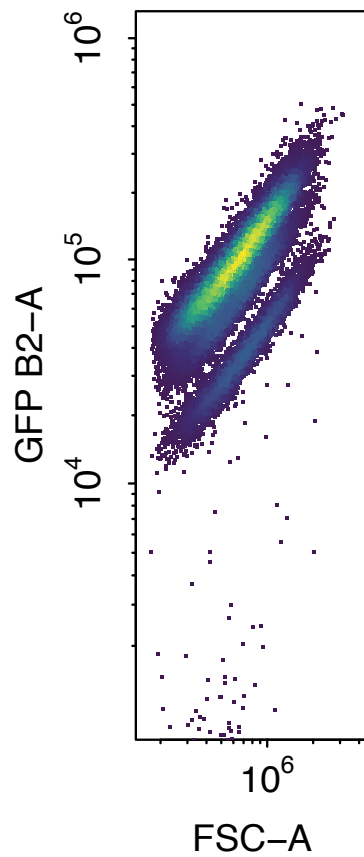

Key

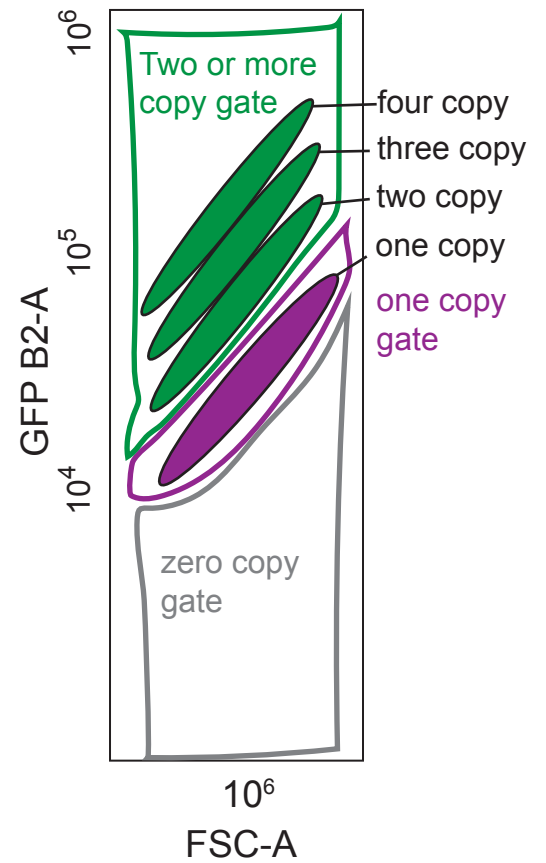

# ARS $\Delta$ population 7

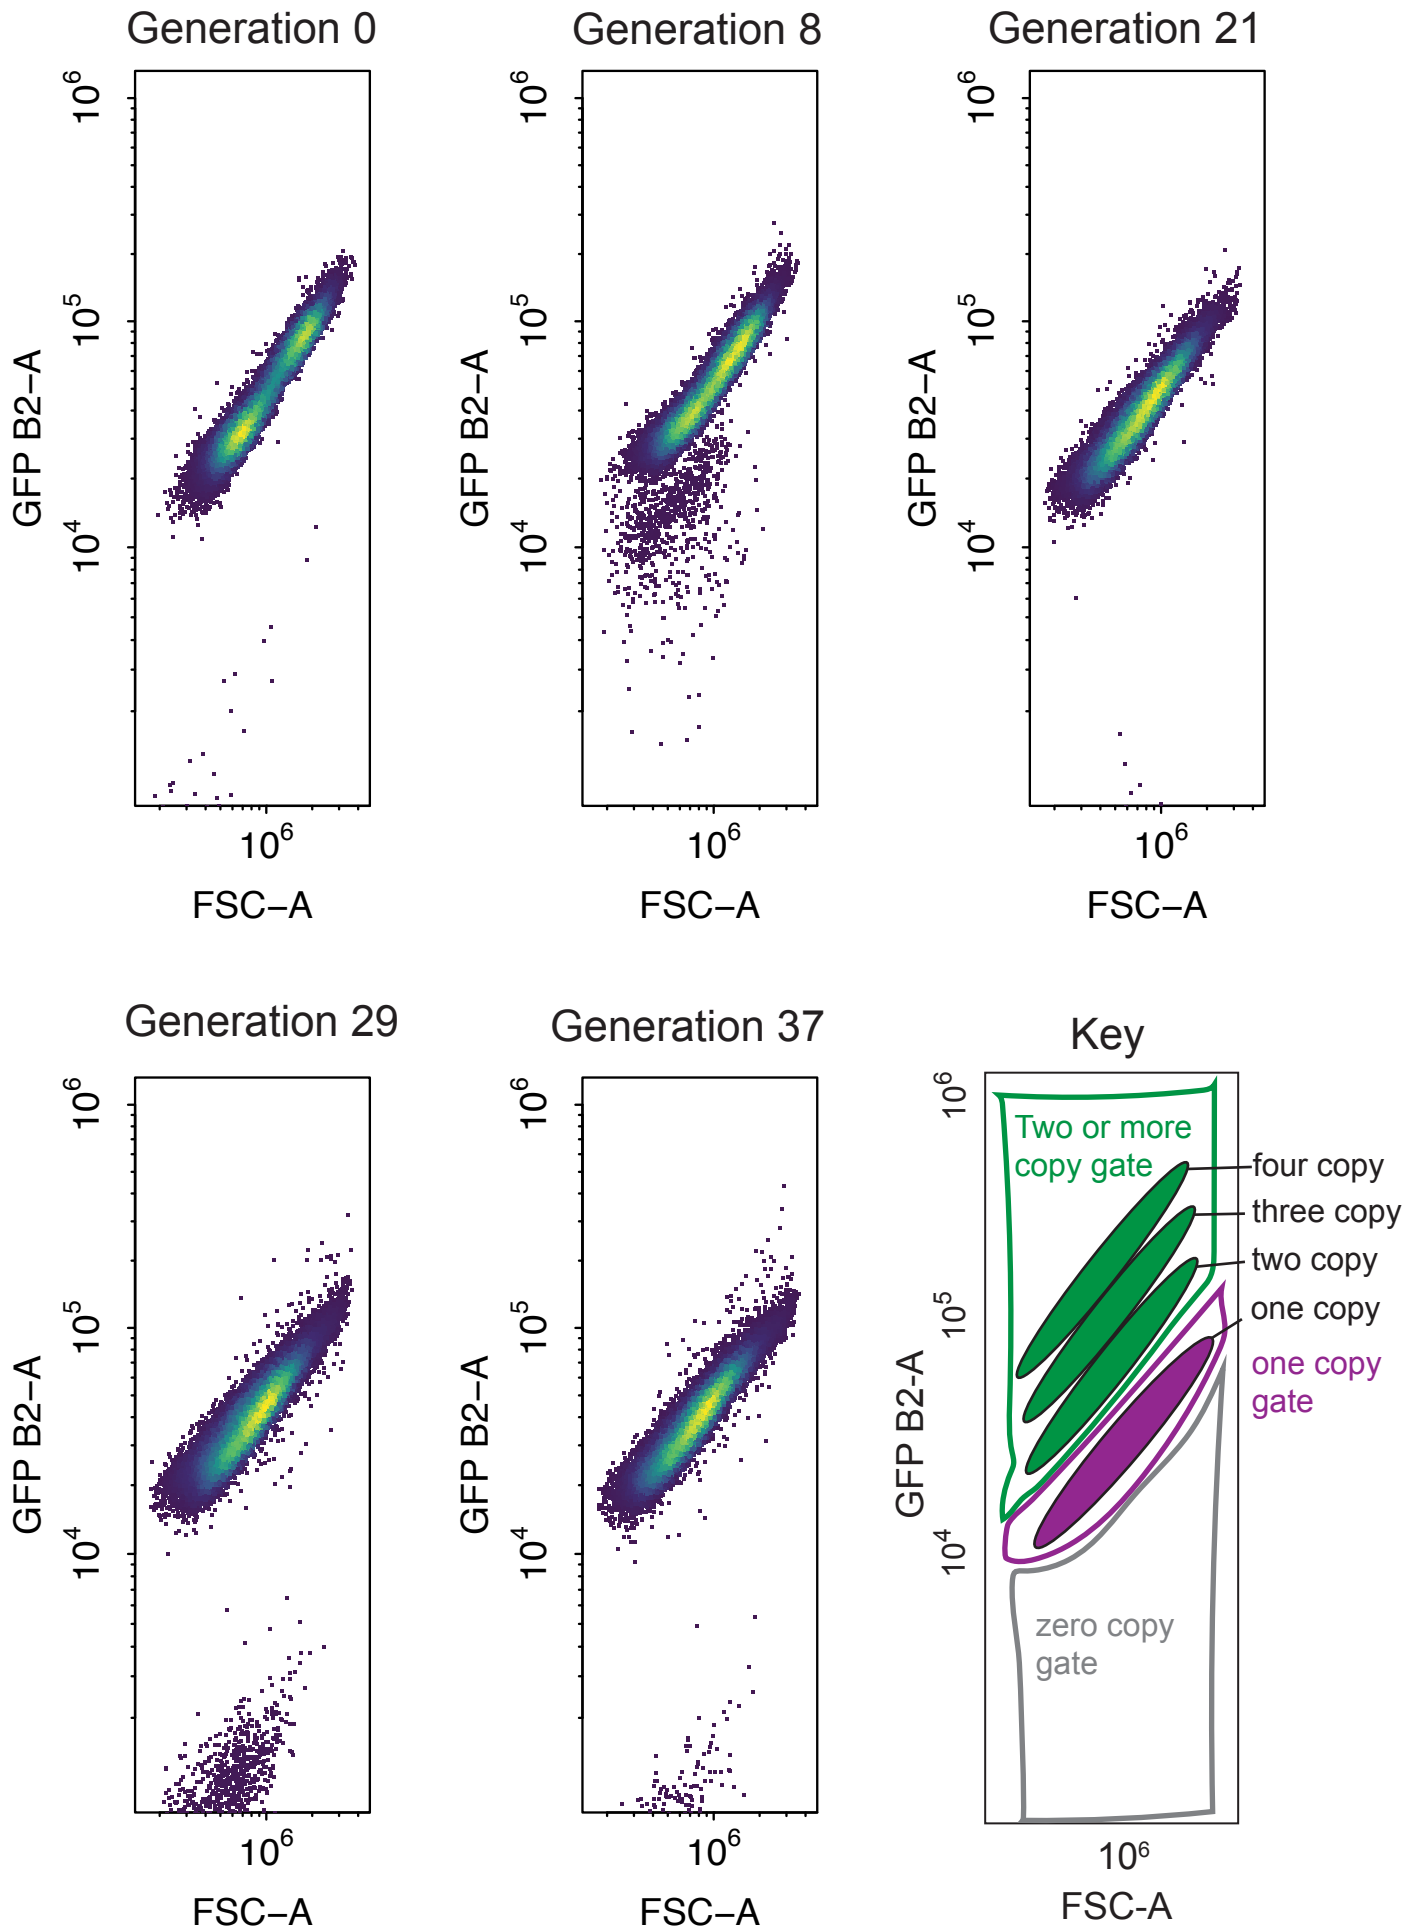

# ARS $\Delta$ population 7

Generation 50

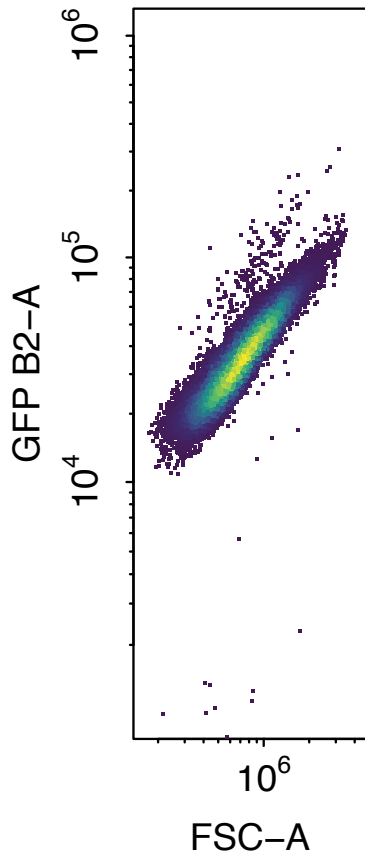

Generation 58

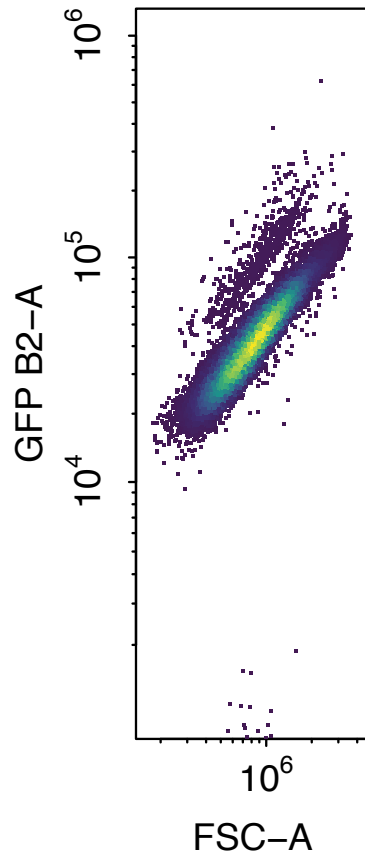

Generation 66

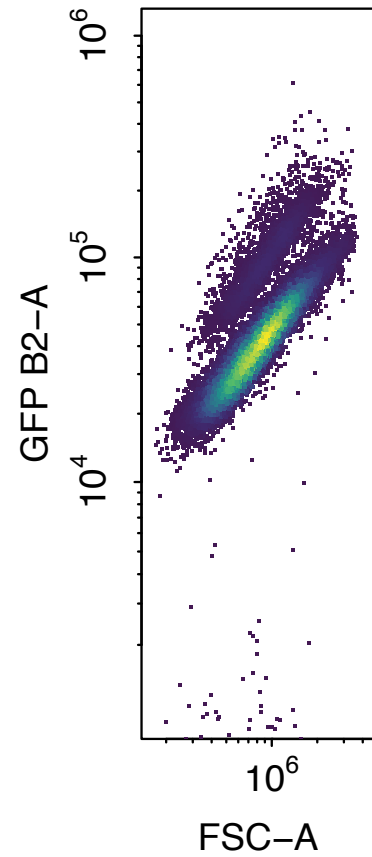

Generation 79

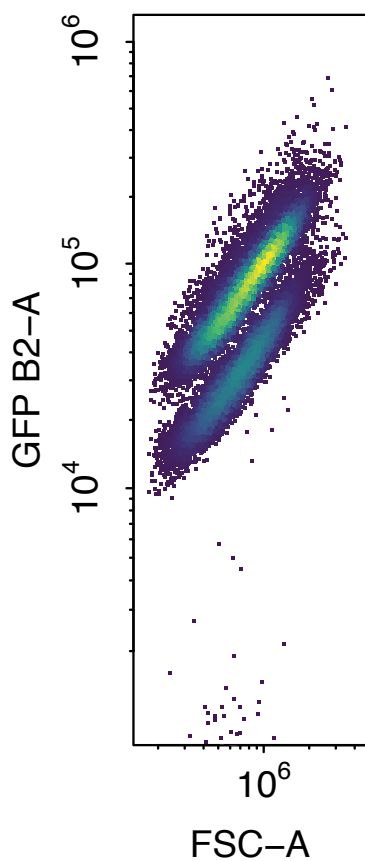

Generation 87

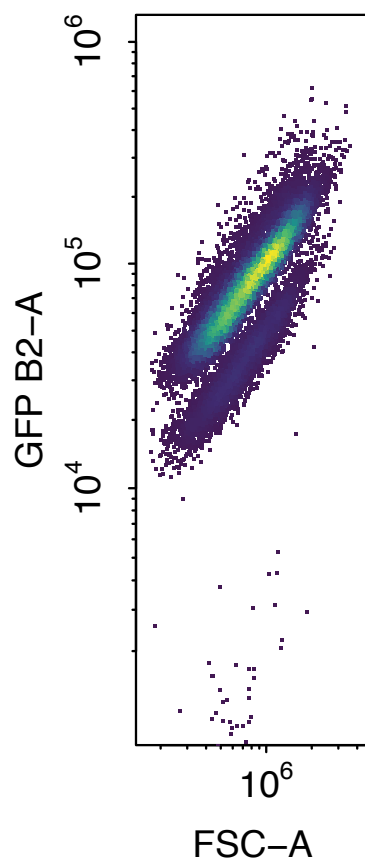

Key

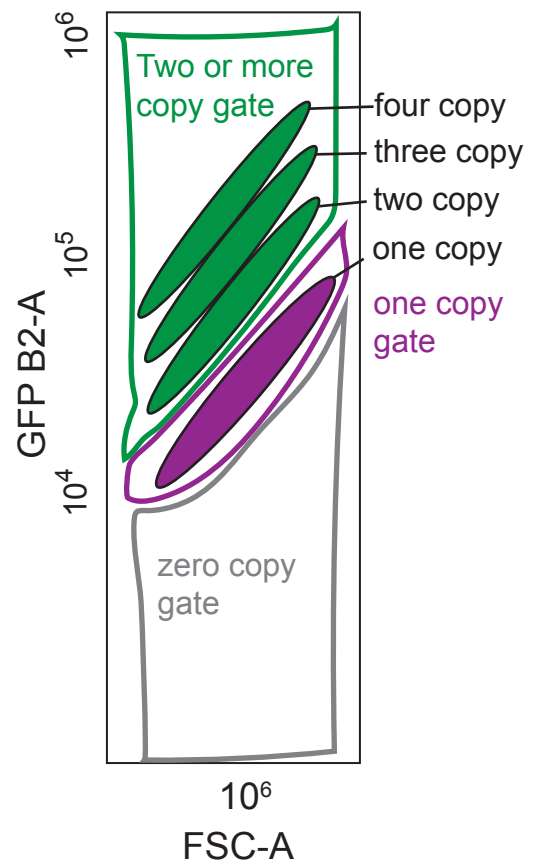

# ARS $\Delta$ population 7

Generation 95

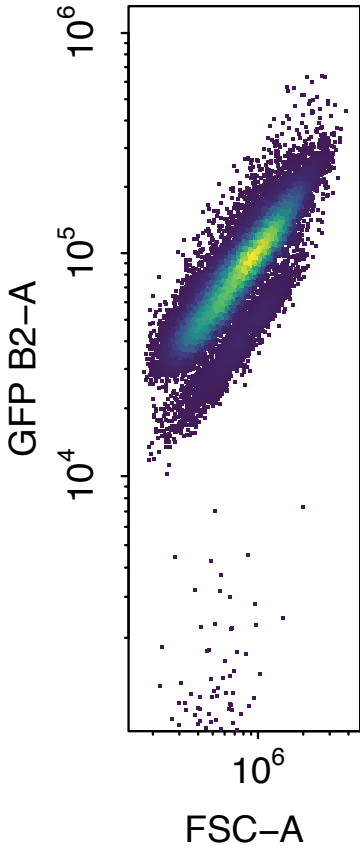

Generation 108

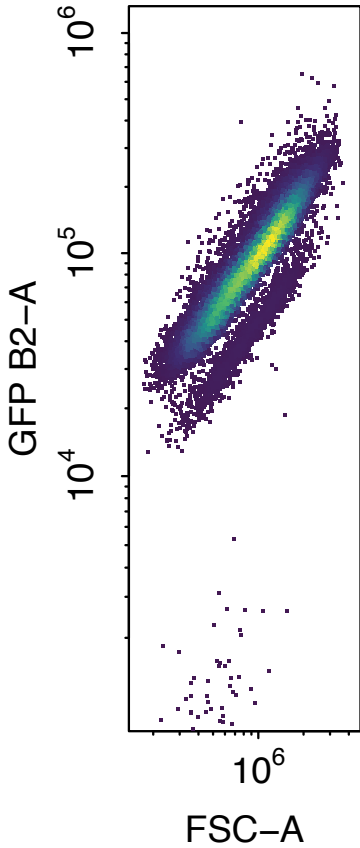

Generation 116

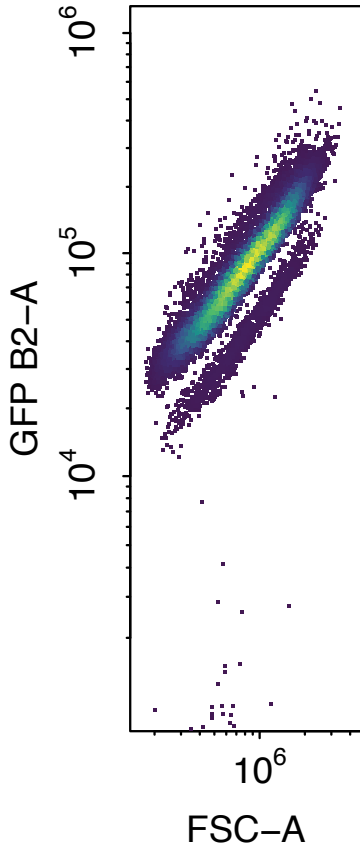

Generation 124

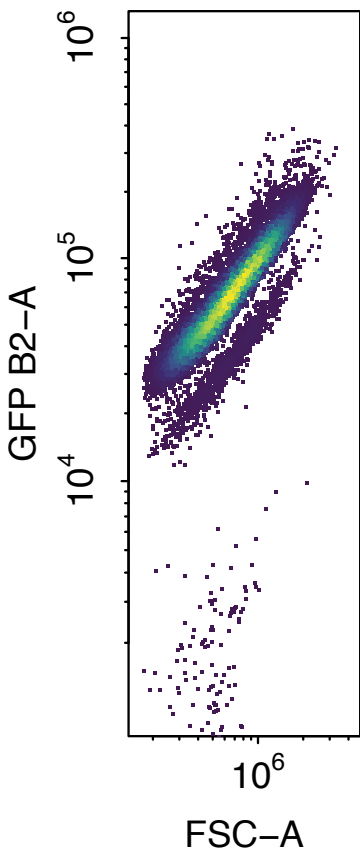

Generation 137

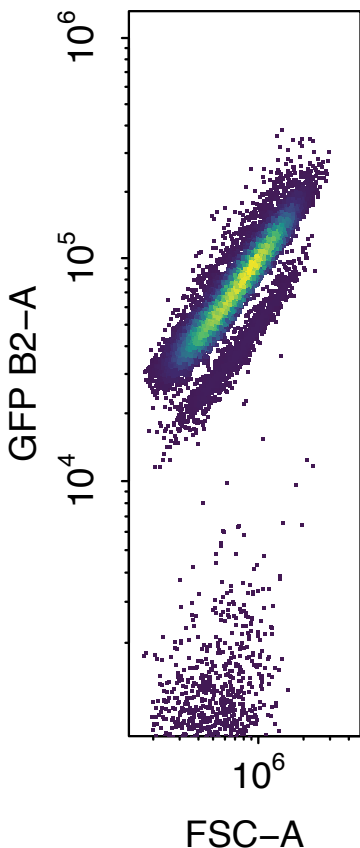

Key

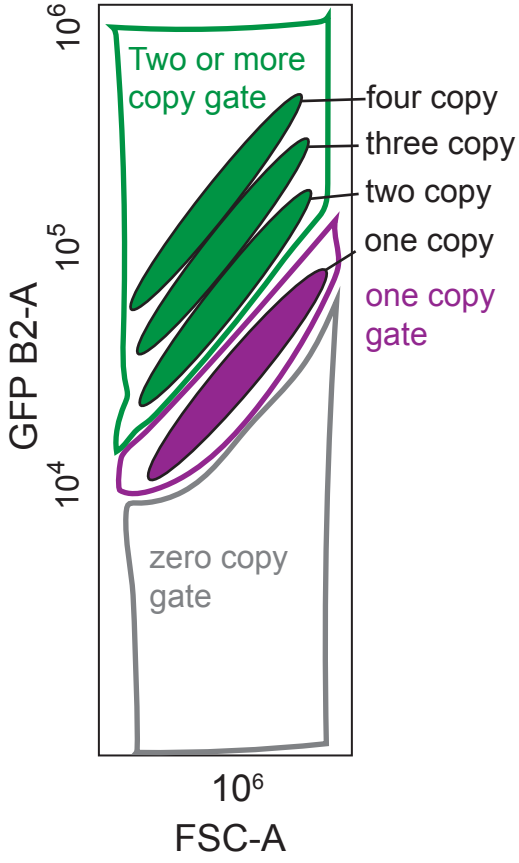

# ARS $\Delta$ population 8

Generation 0

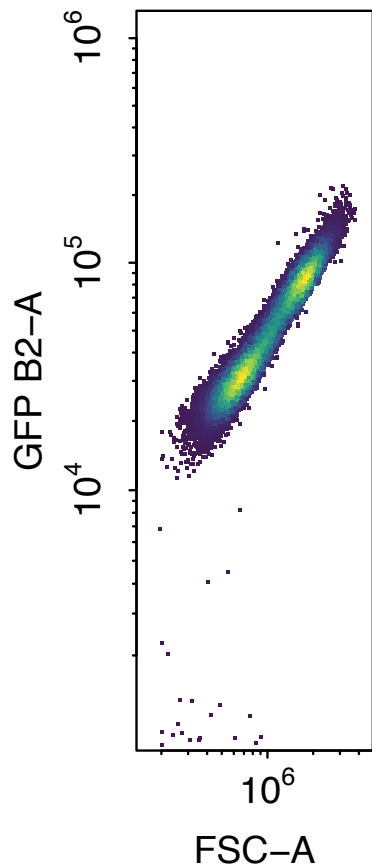

Generation 8

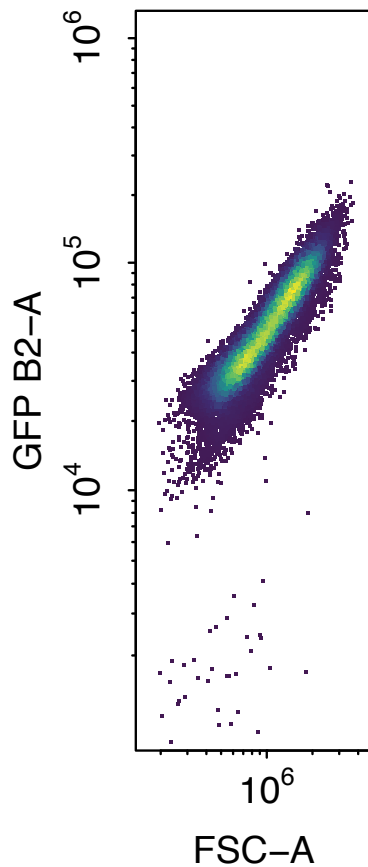

Generation 21

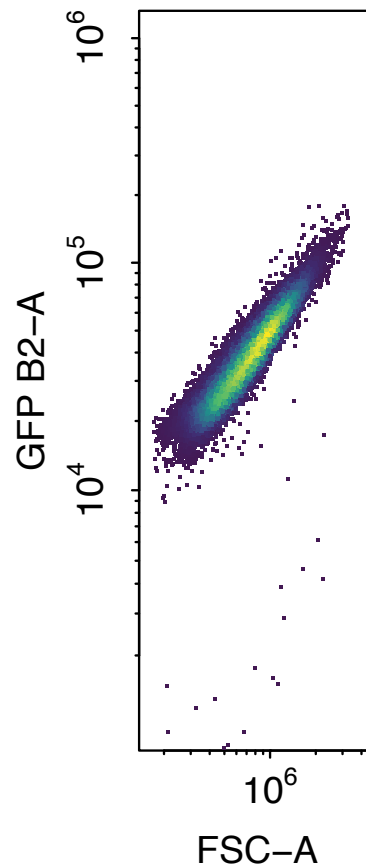

Generation 29

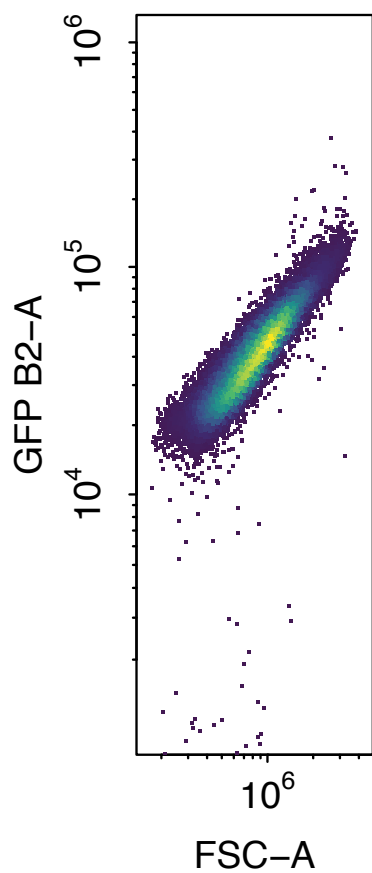

Generation 37

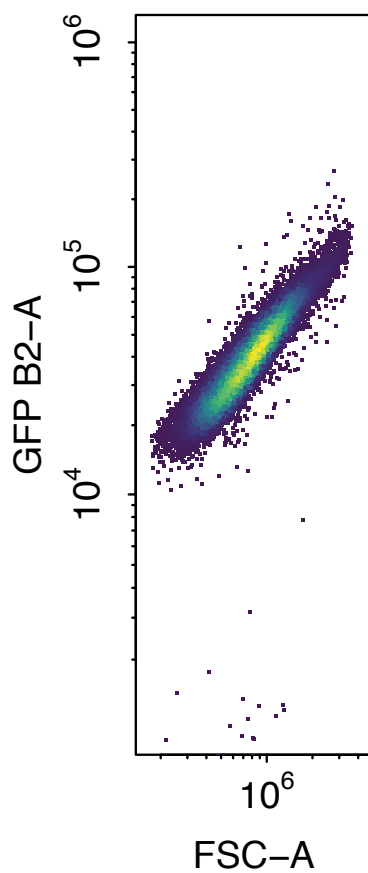

Key

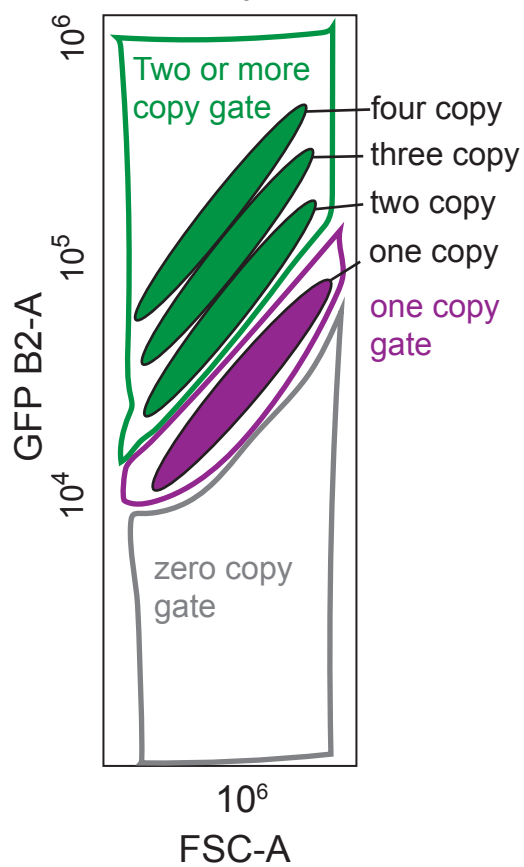

# ARS $\Delta$ population 8

Generation 50

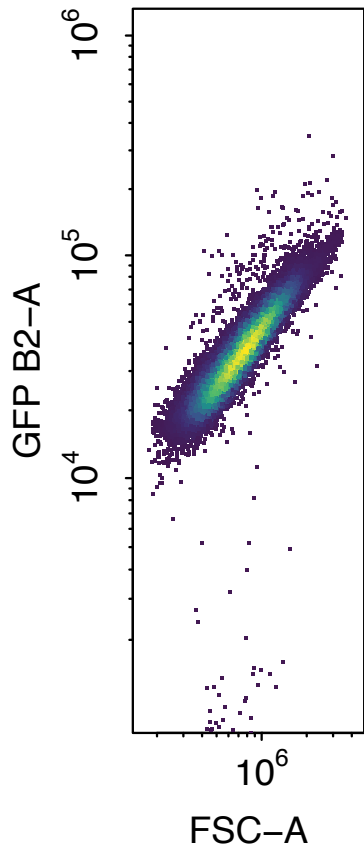

Generation 58

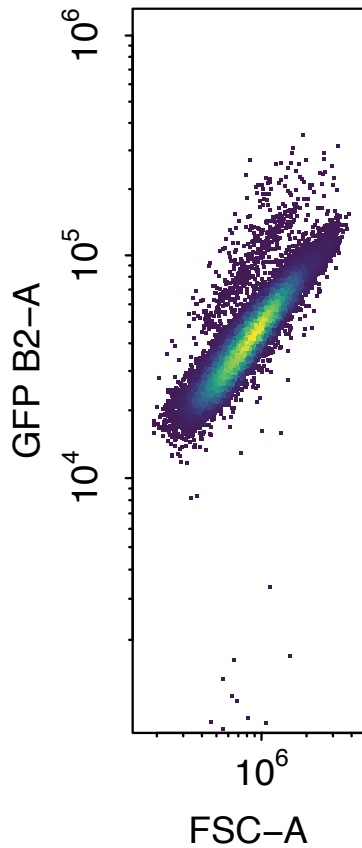

Generation 66

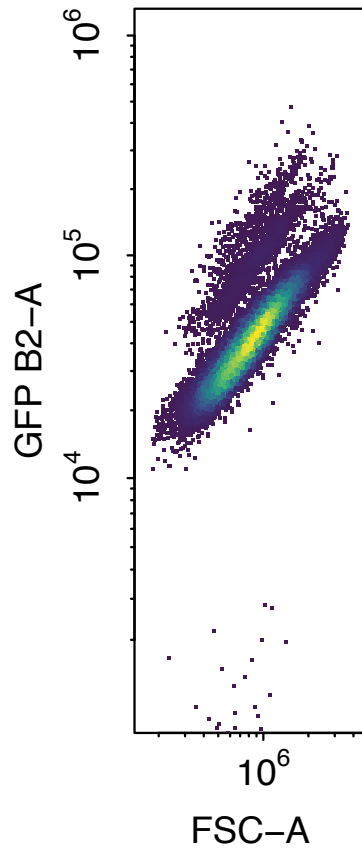

Generation 79

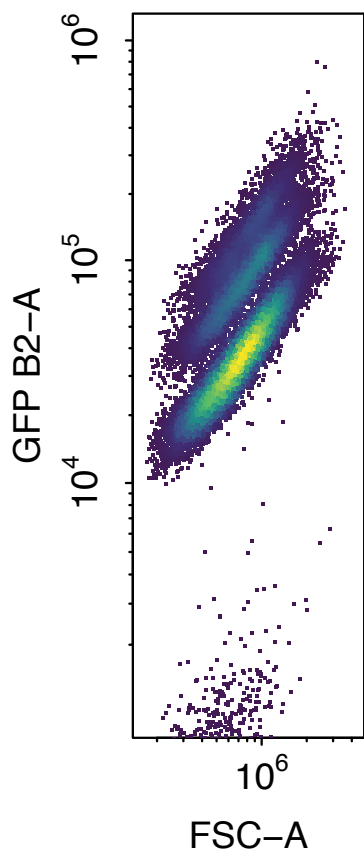

Generation 87

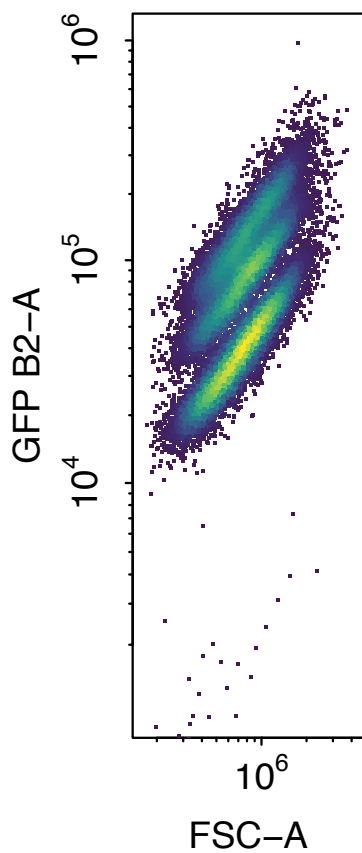

Key

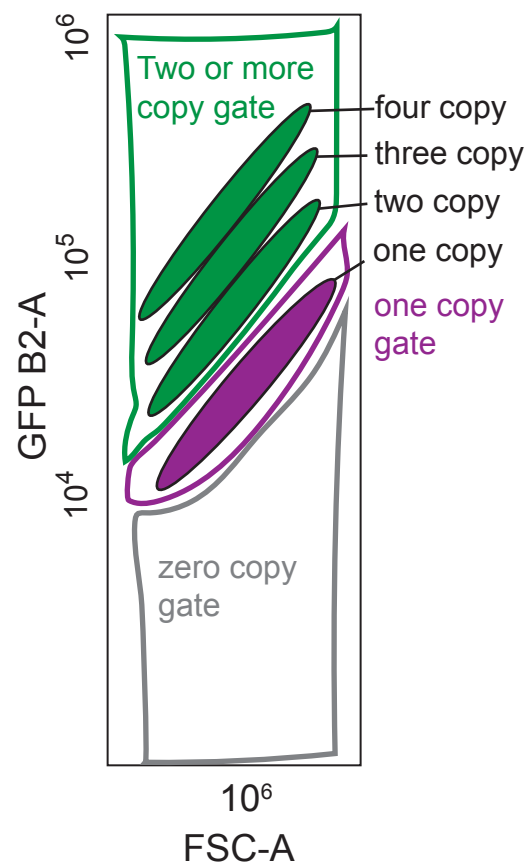



# ARS $\Delta$ population 8

Generation 95

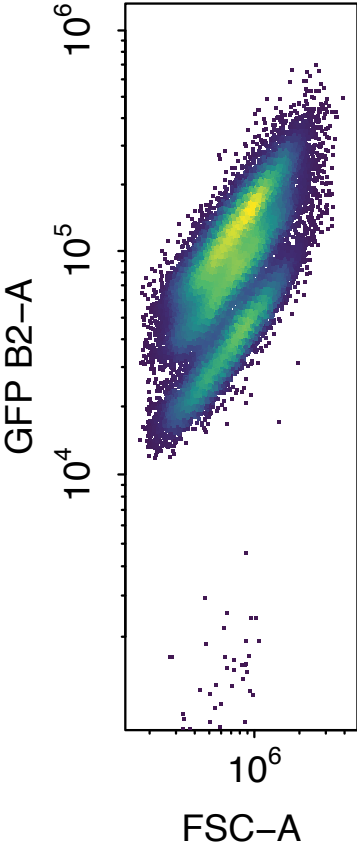

Generation 108

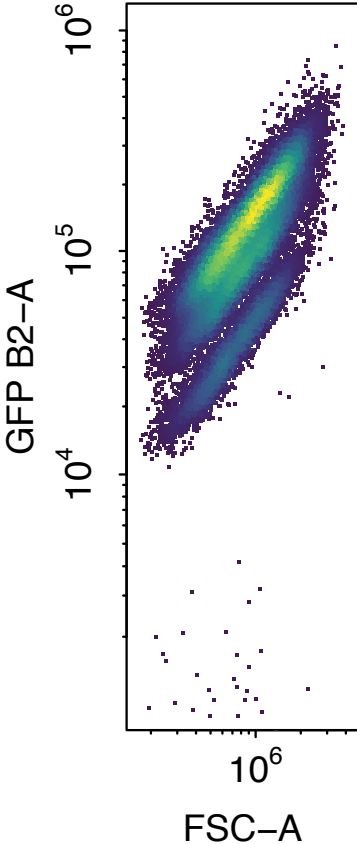

Generation 116

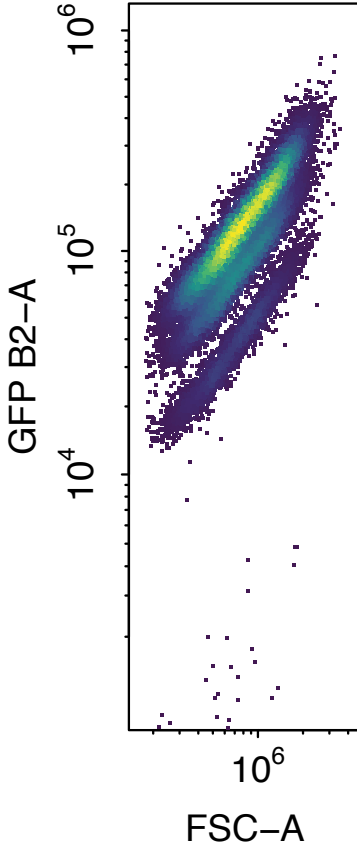

Generation 124

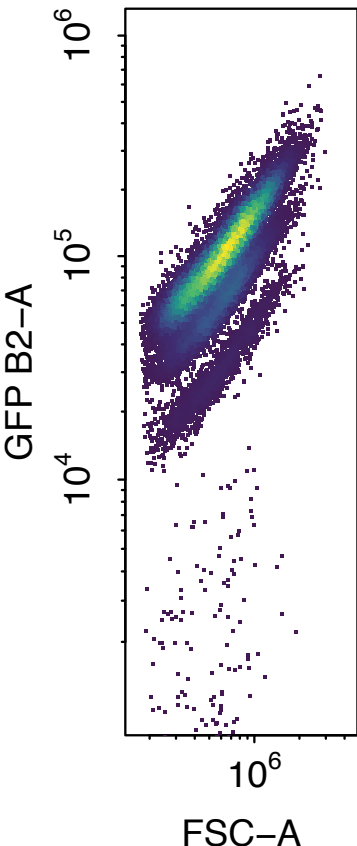

Generation 137

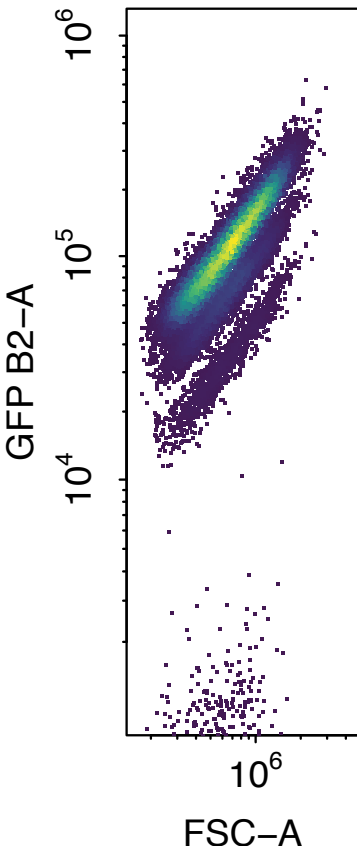

Key

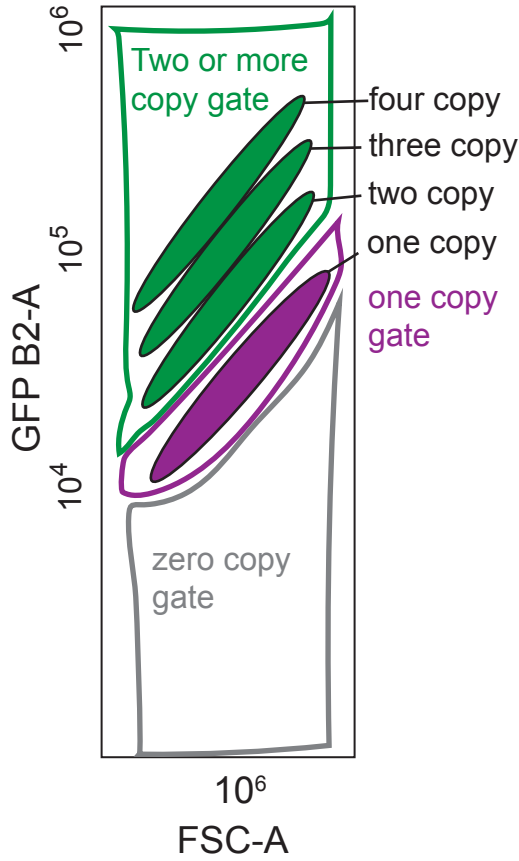

# ALL $\Delta$ population 1

Generation 0

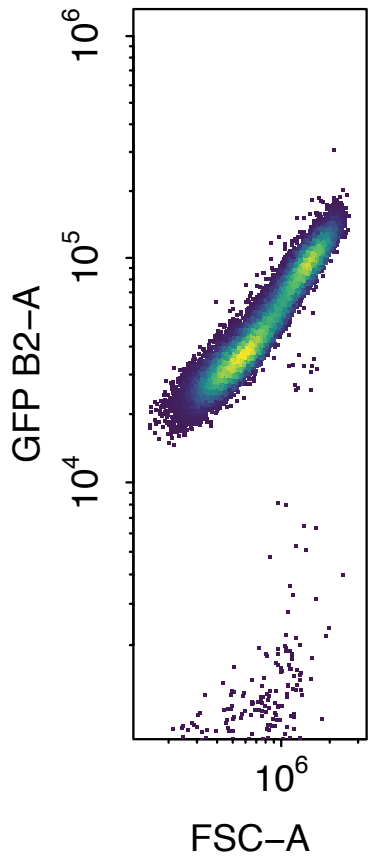

Generation 8

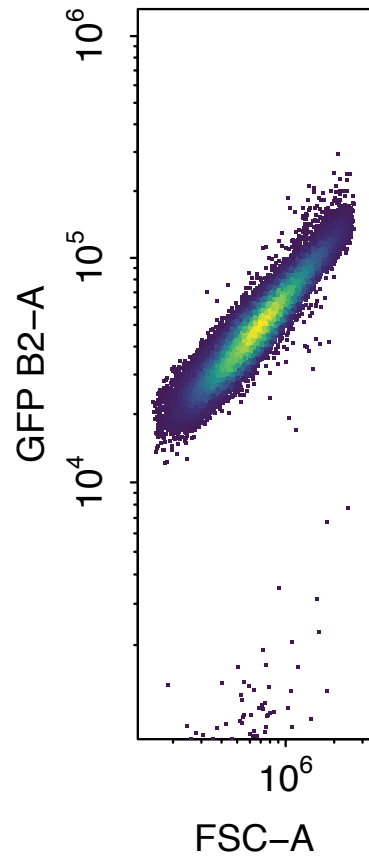

Generation 21

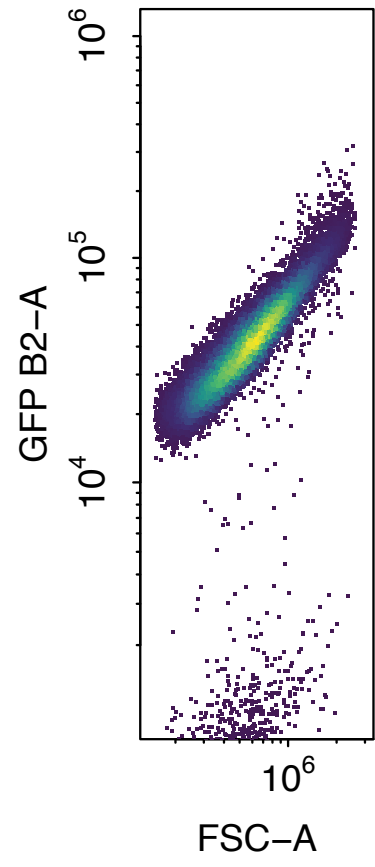

Generation 29

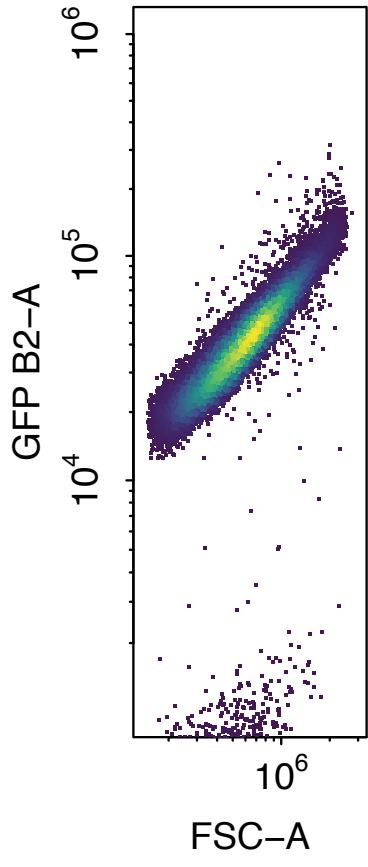

Generation 37

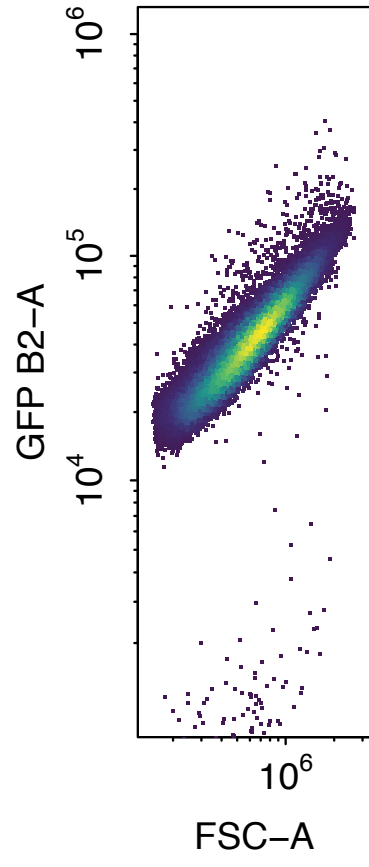

Key

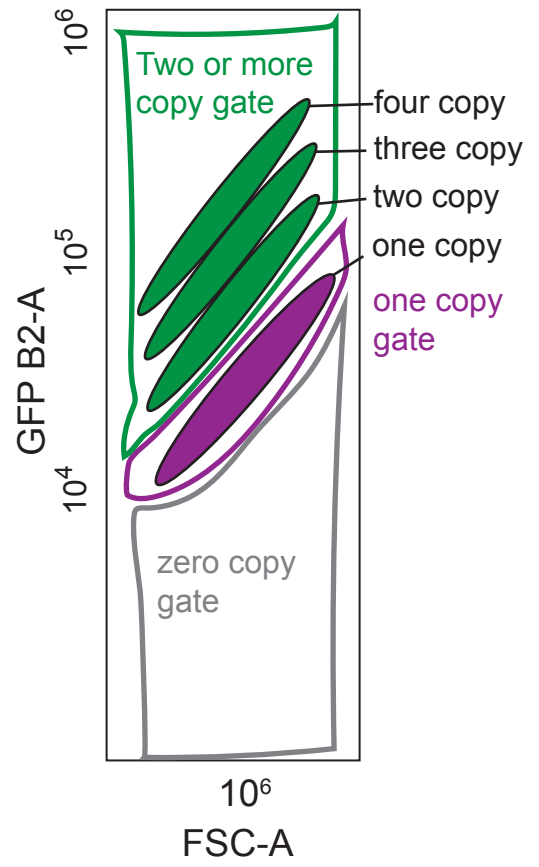

# ALL $\Delta$ population 1

Generation 50

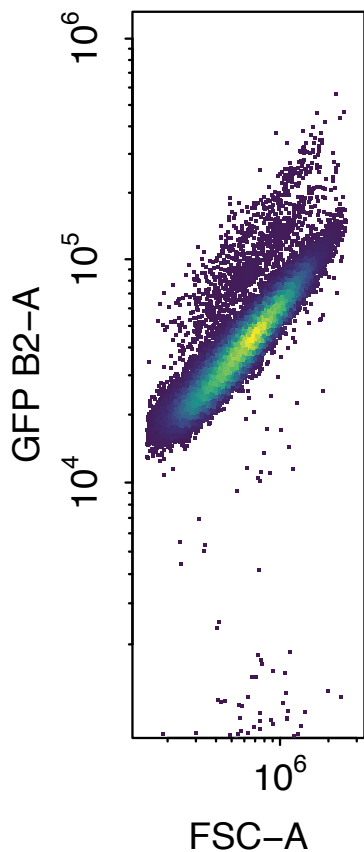

Generation 58

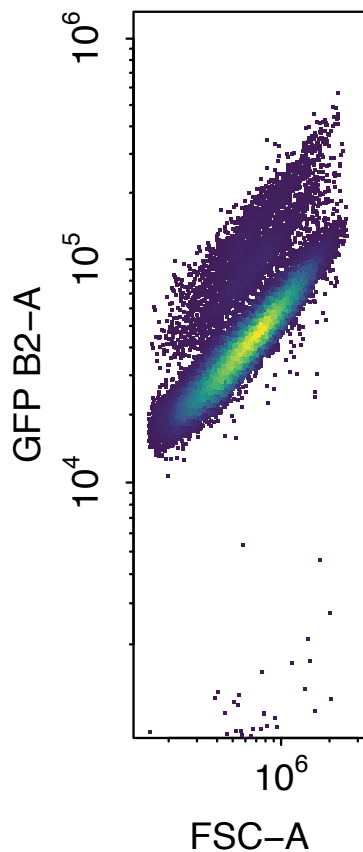

Generation 66

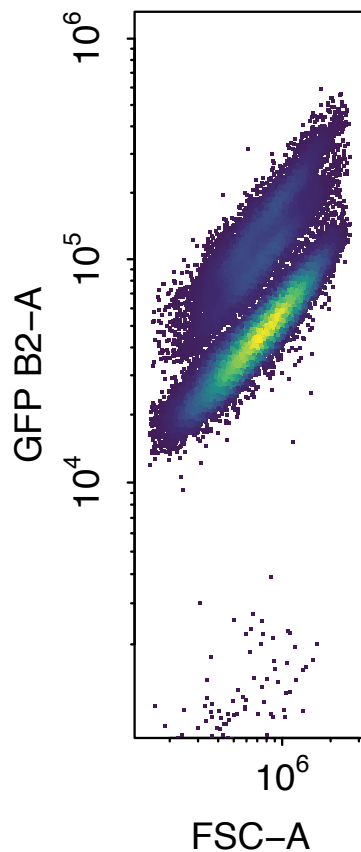

Generation 79

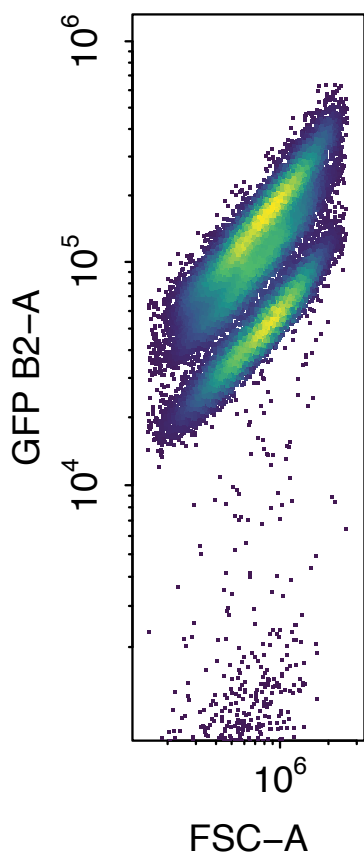

Generation 87

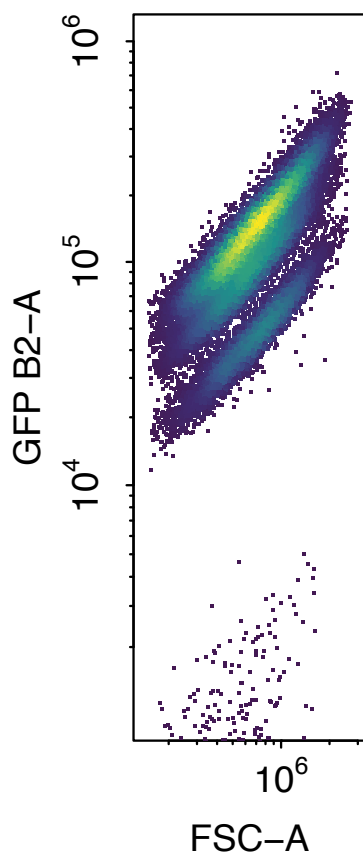

Key

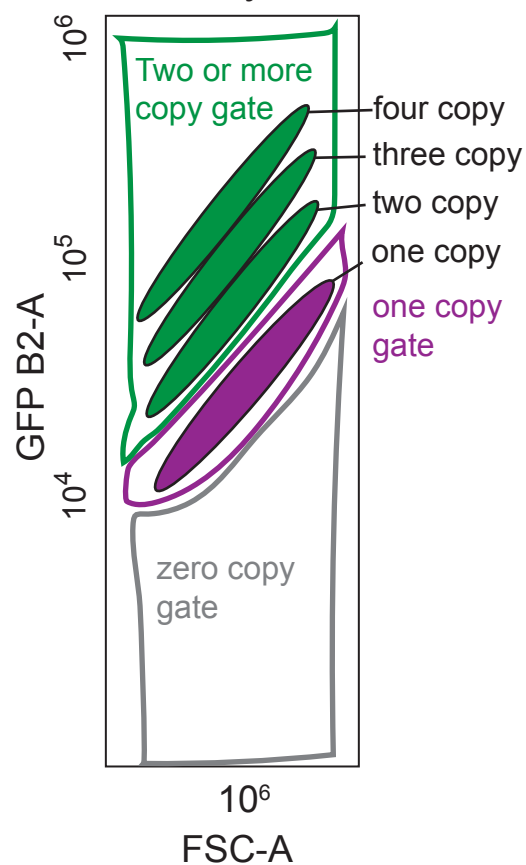

# ALL $\Delta$ population 1

Generation 95

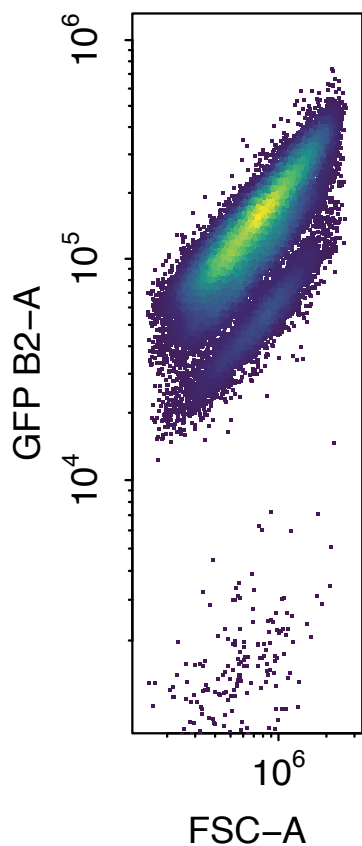

Generation 108

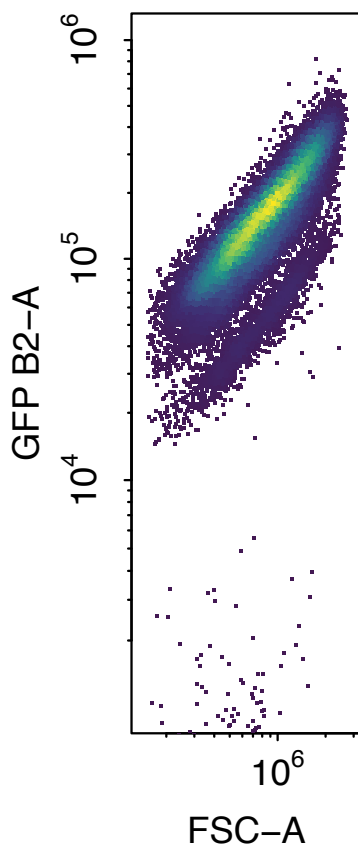

Generation 116

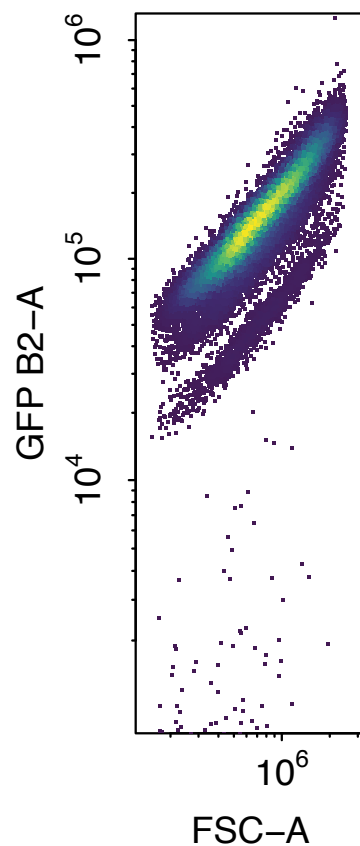

Generation 124

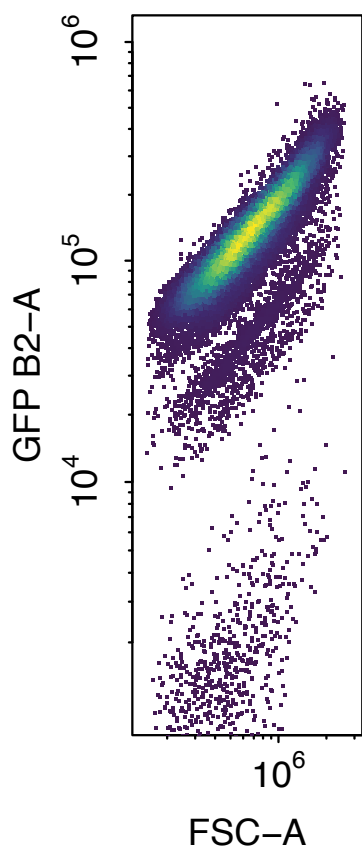

Generation 137

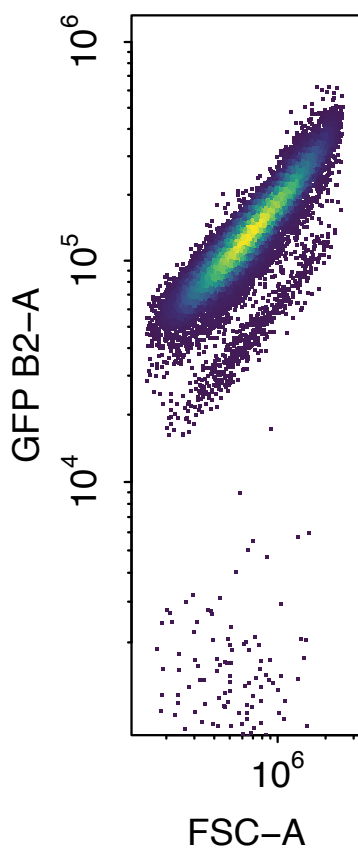

Key

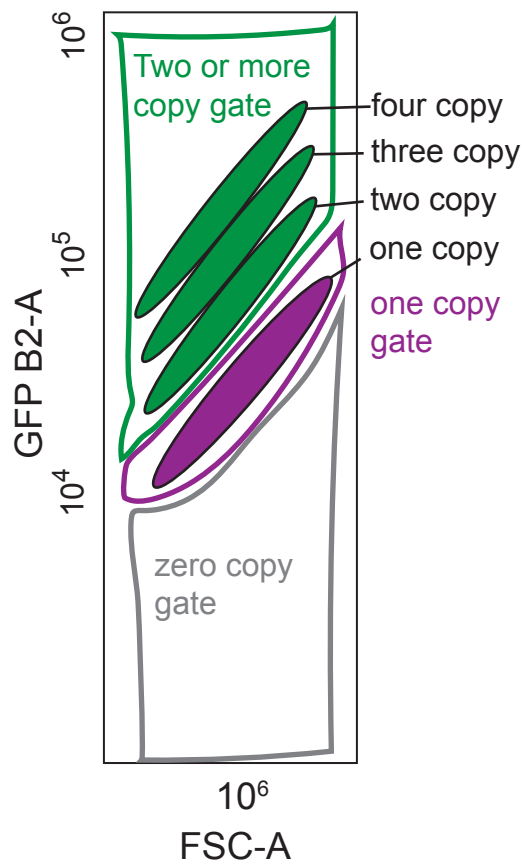

# ALL $\Delta$ population 2

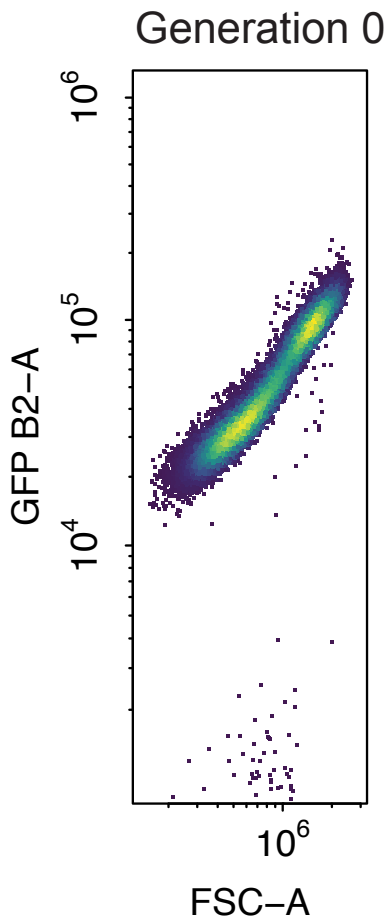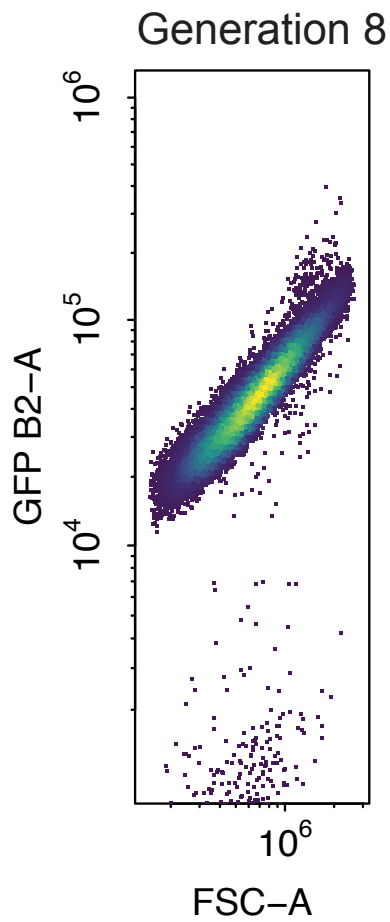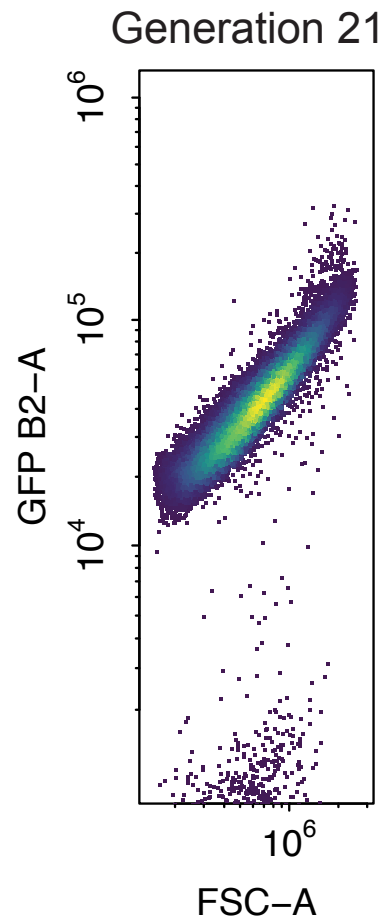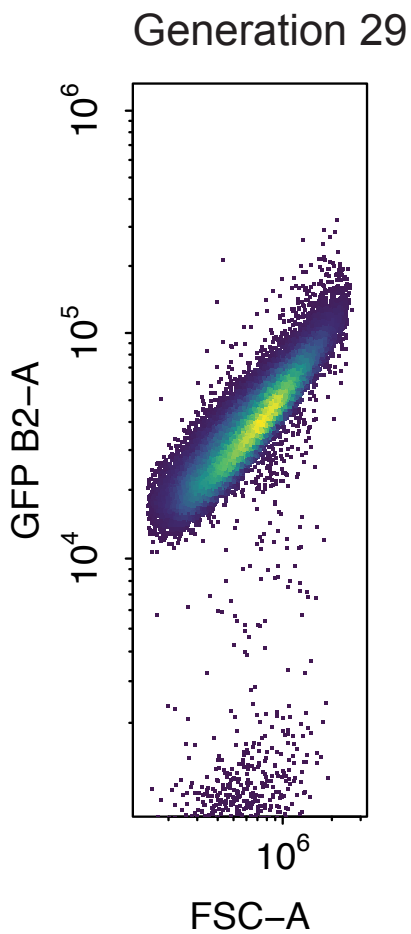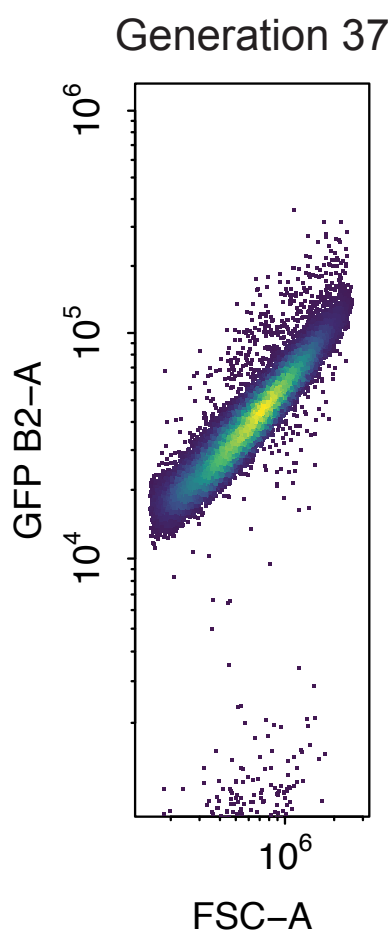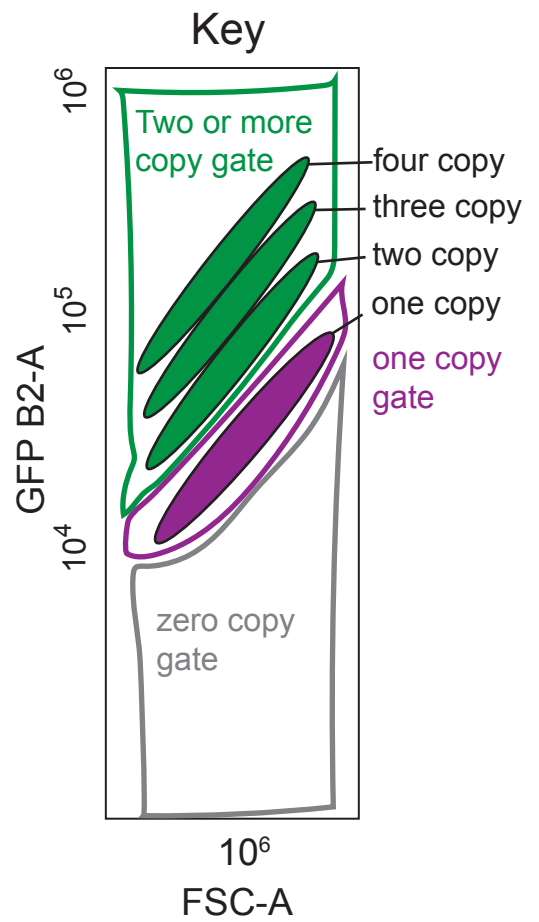

# ALL $\Delta$ population 2

Generation 50

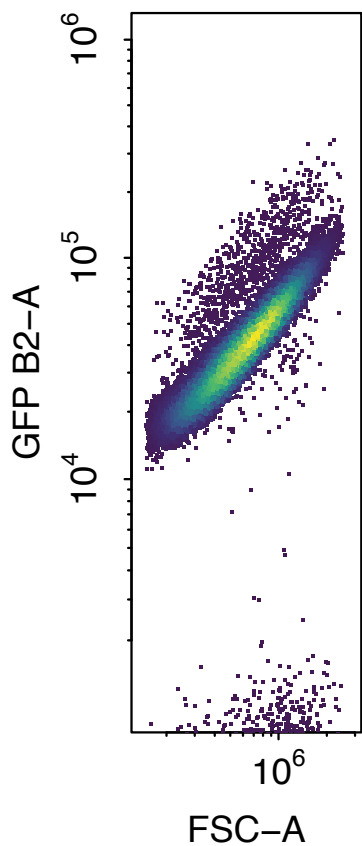

Generation 58

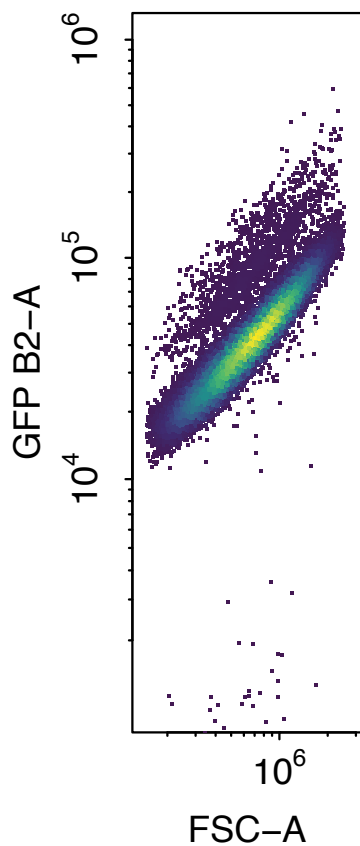

Generation 66

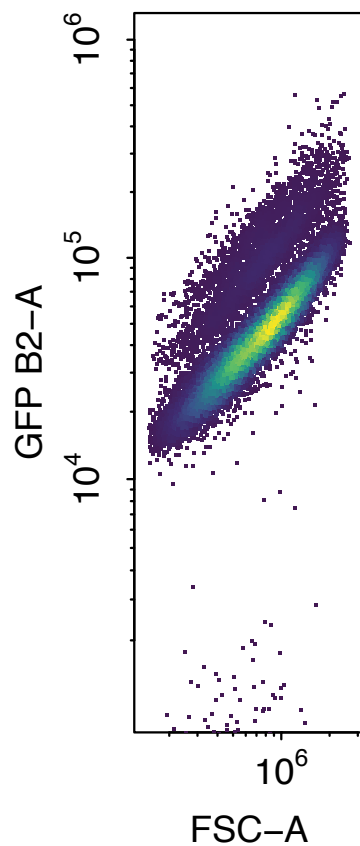

Generation 79

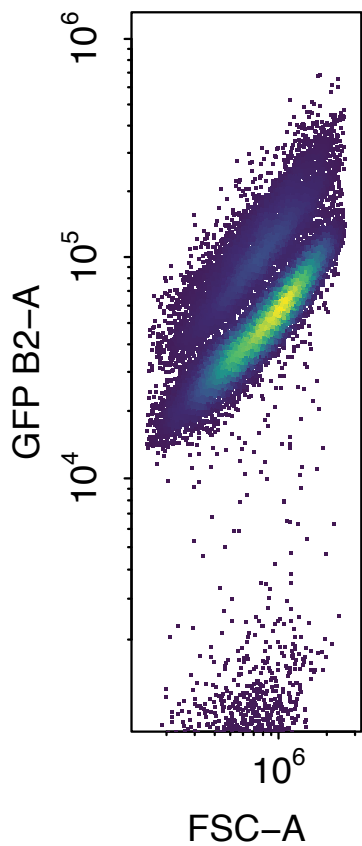

Generation 87

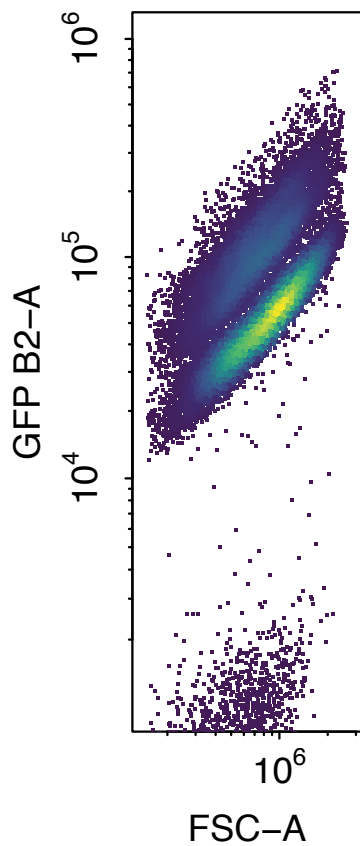

Key

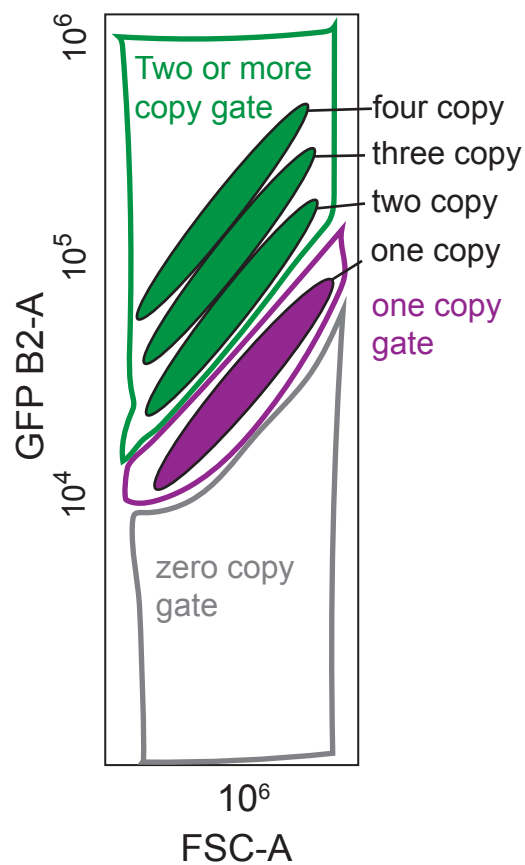

# ALL $\Delta$ population 2

Generation 95

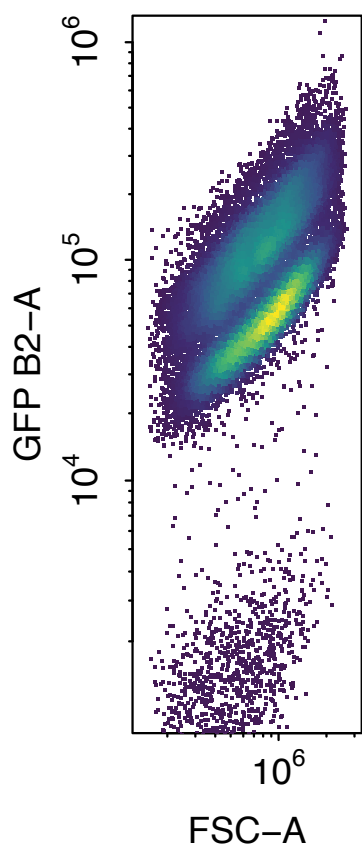

Generation 108

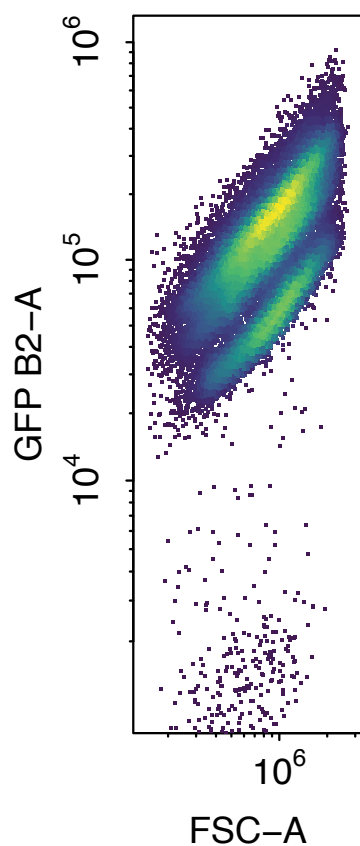

Generation 116

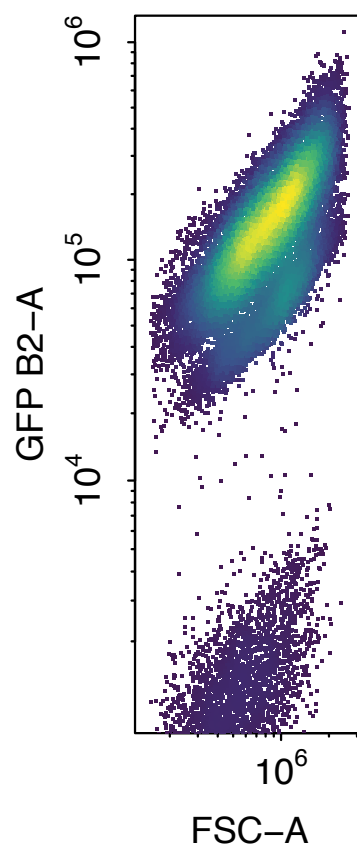

Generation 124

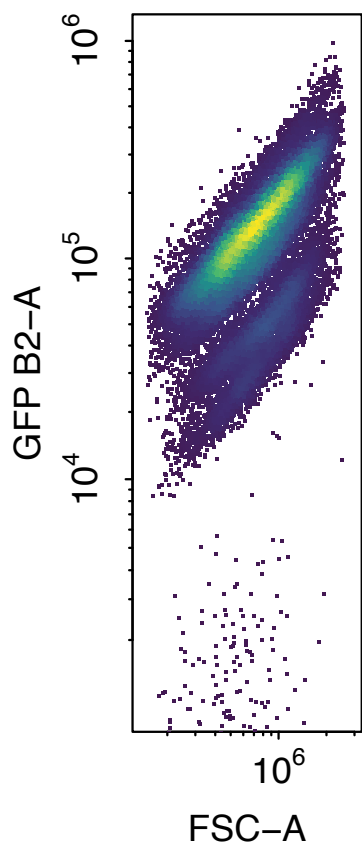

Generation 137

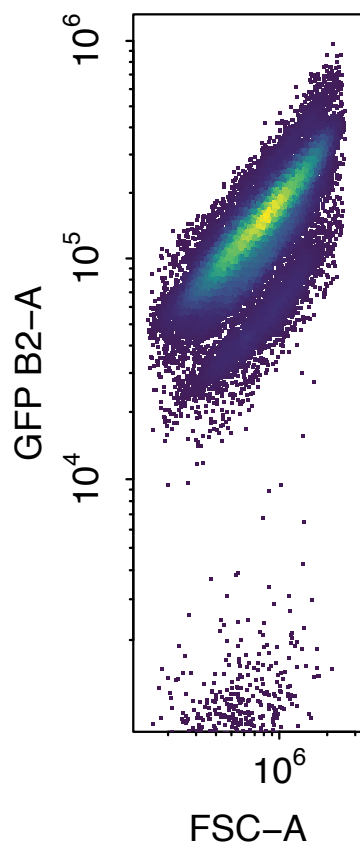

Key

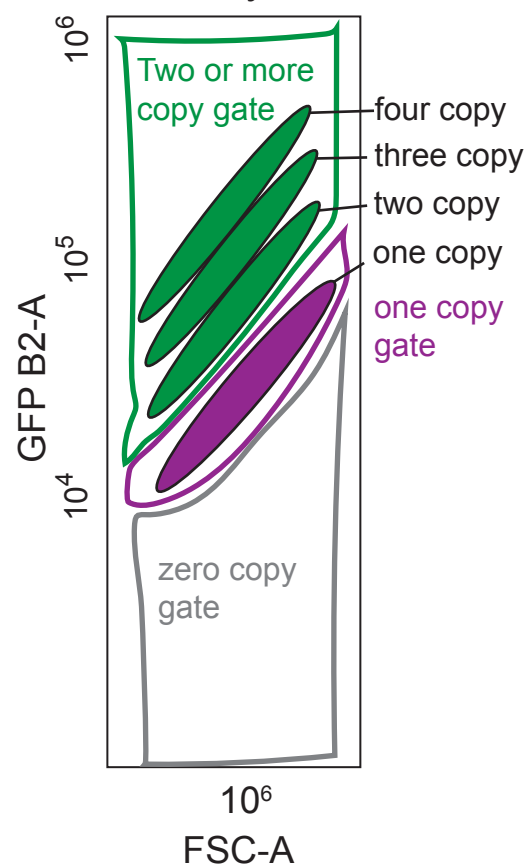

# ALL $\Delta$ population 3

Generation 0

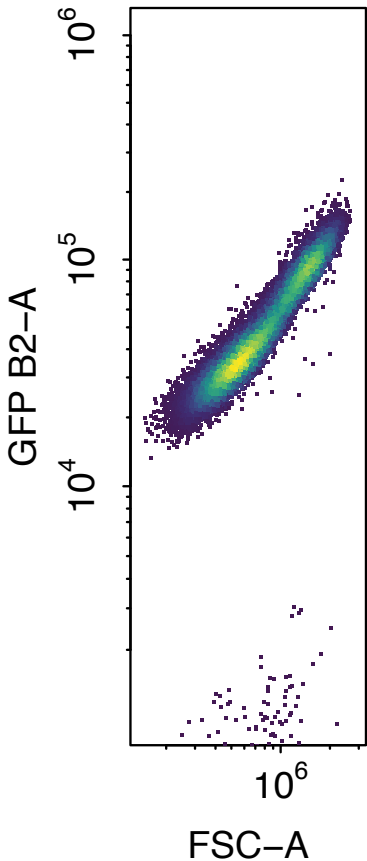

Generation 8

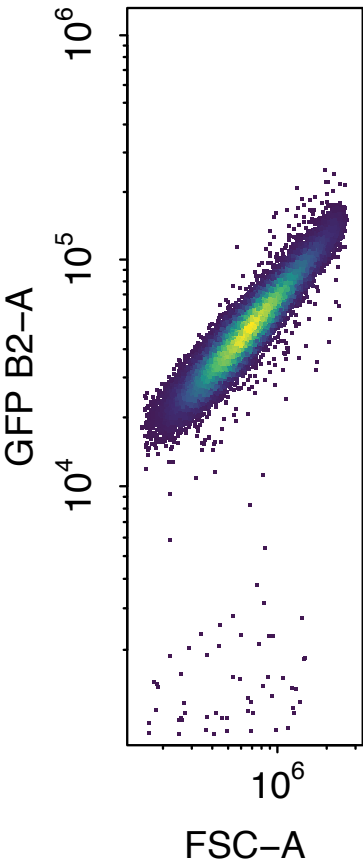

Generation 21

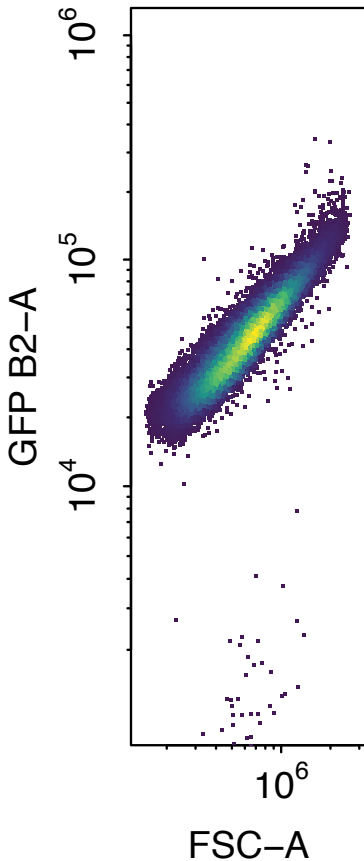

Generation 29

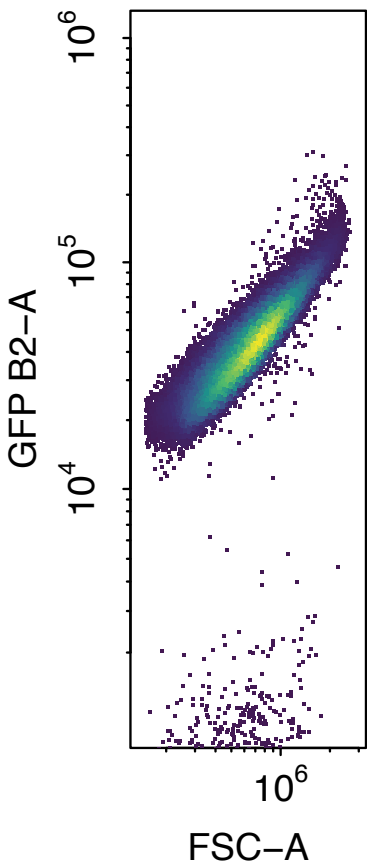

Generation 37

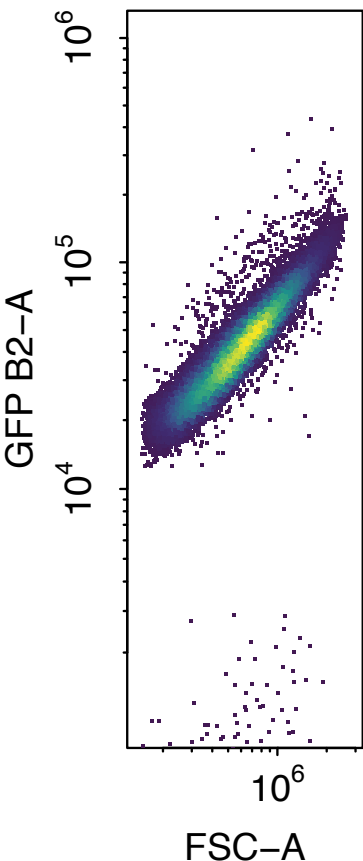

Key

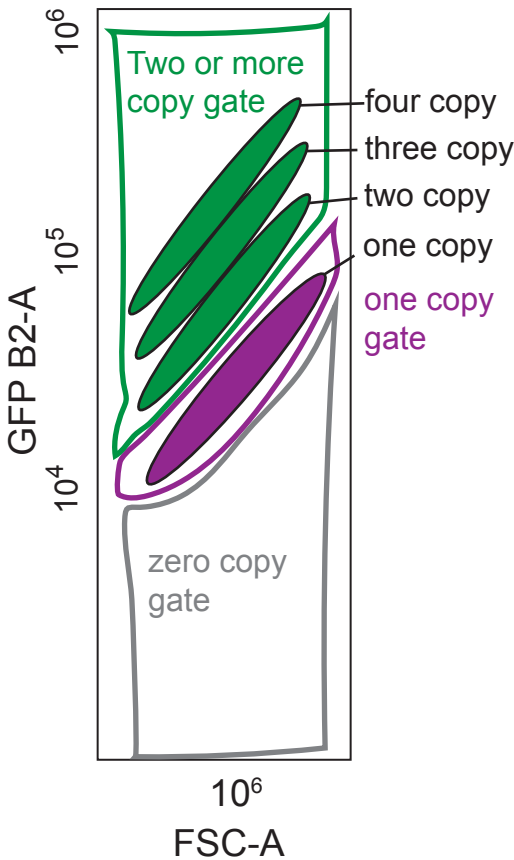



# ALL $\Delta$ population 3

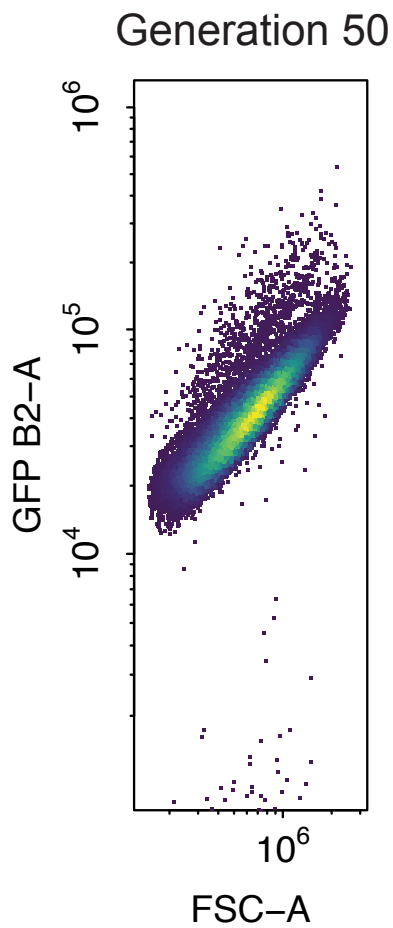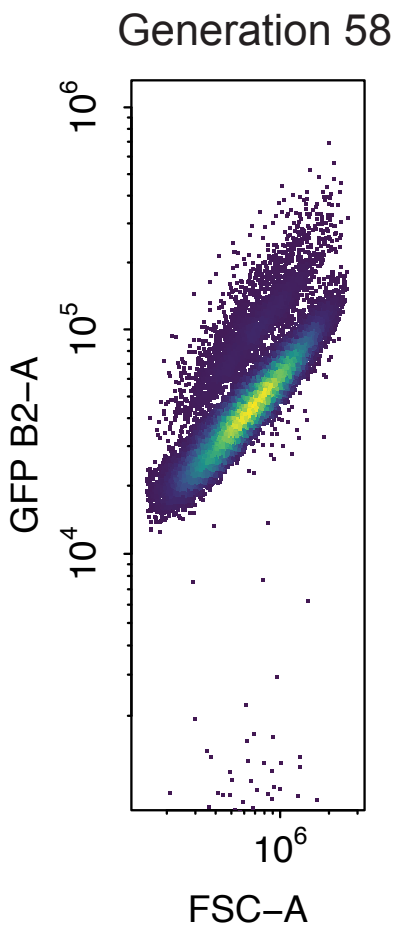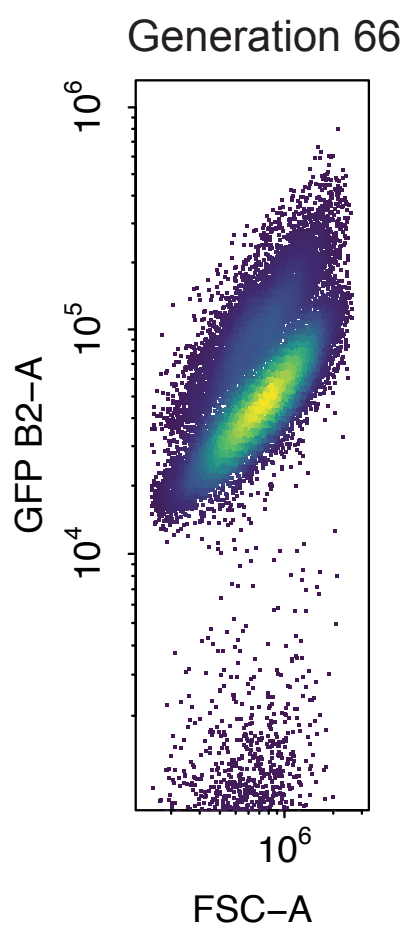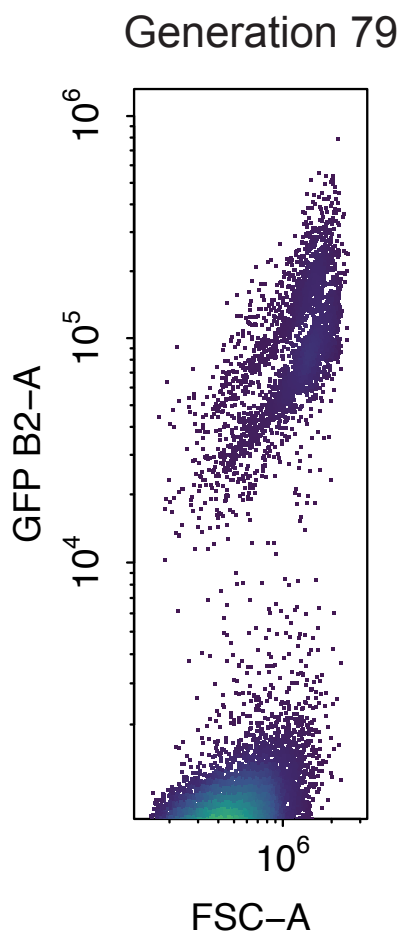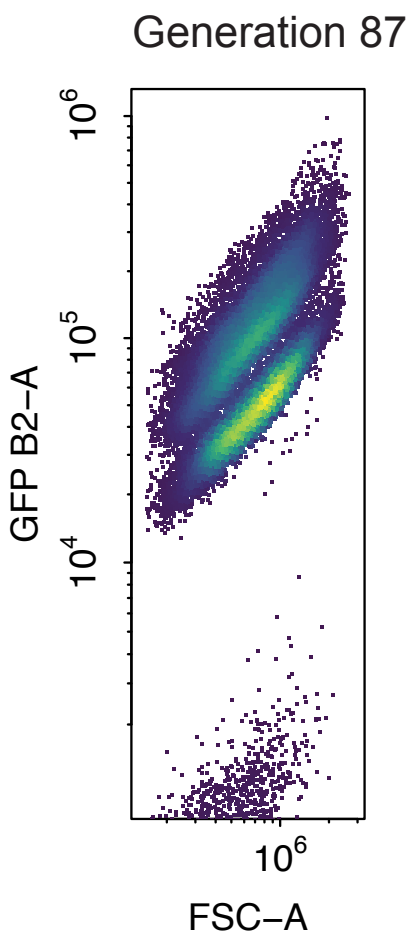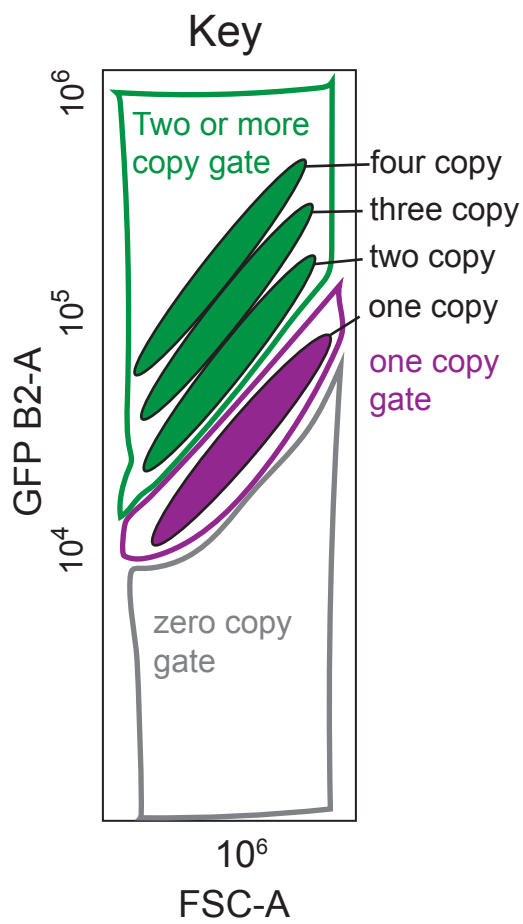

# ALL $\Delta$ population 3

Generation 95

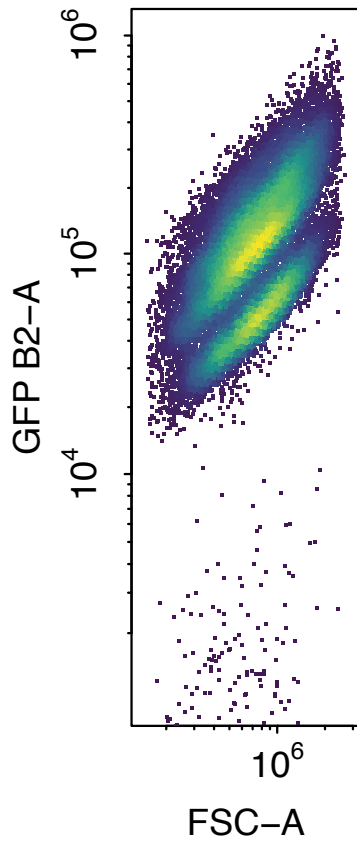

Generation 108

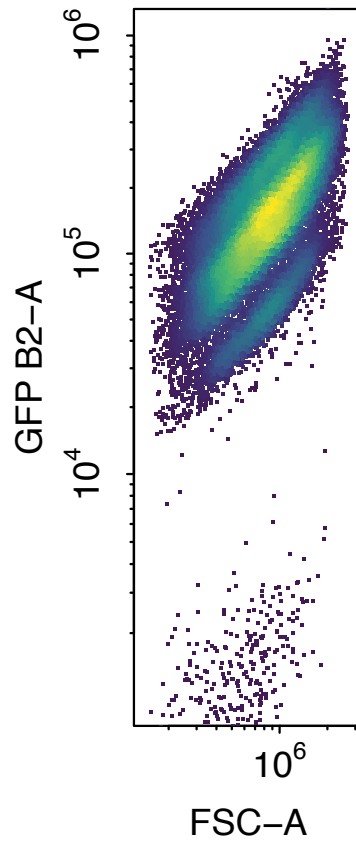

Generation 116

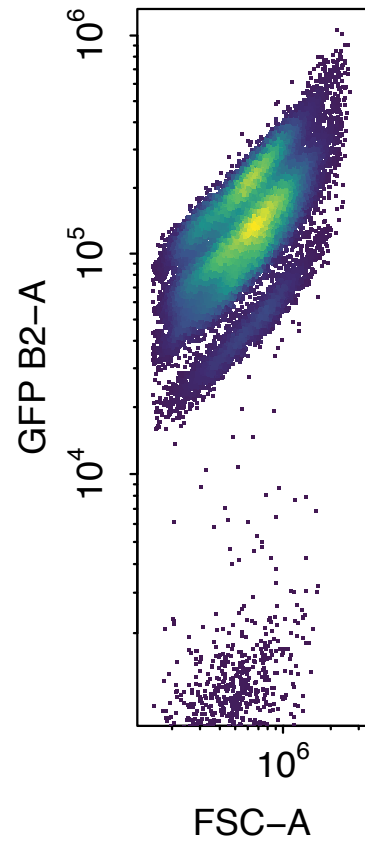

Generation 124

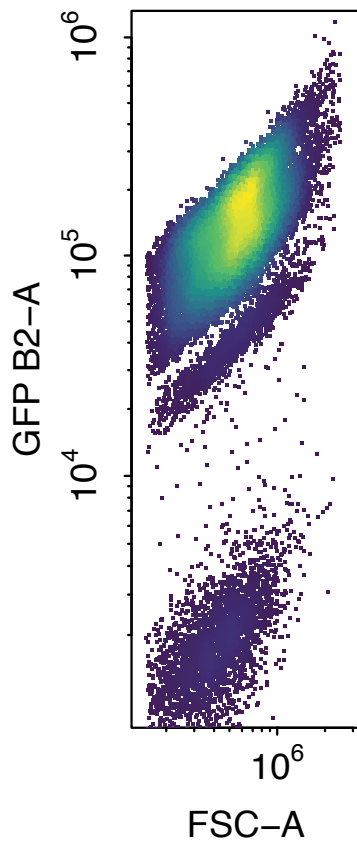

Generation 137

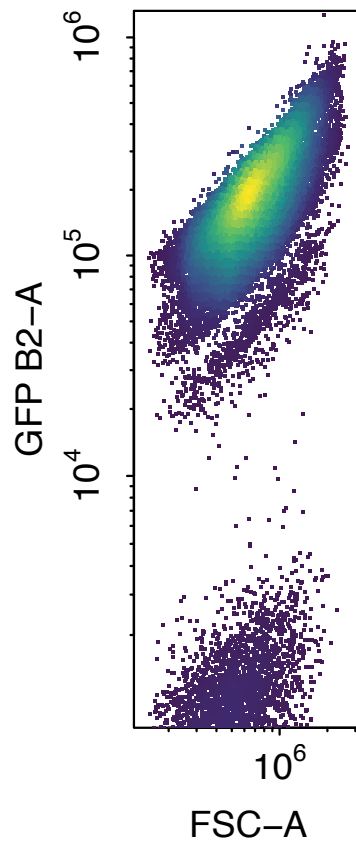

Key



# ALL $\Delta$ population 4

Generation 0

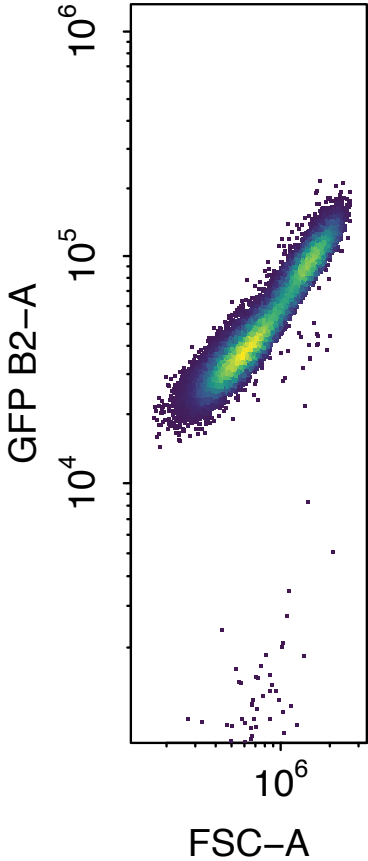

Generation 8

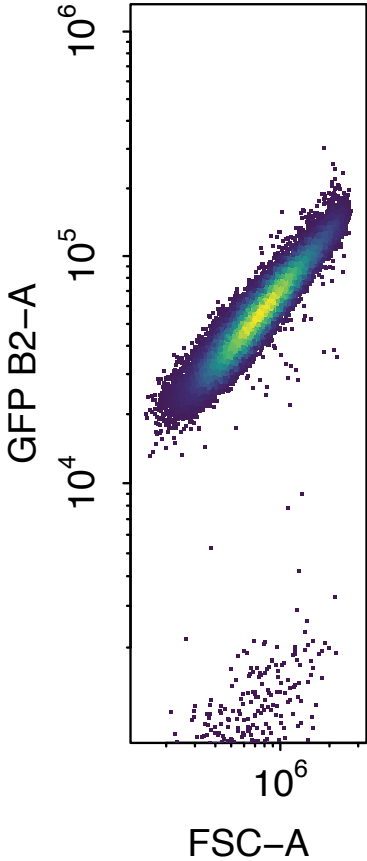

Generation 21

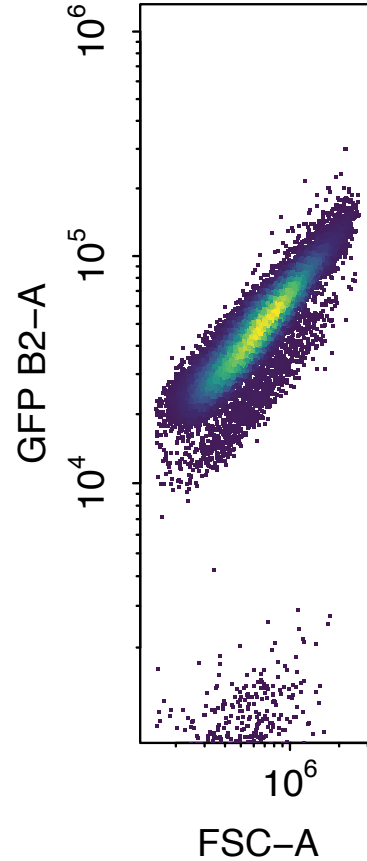

Generation 29

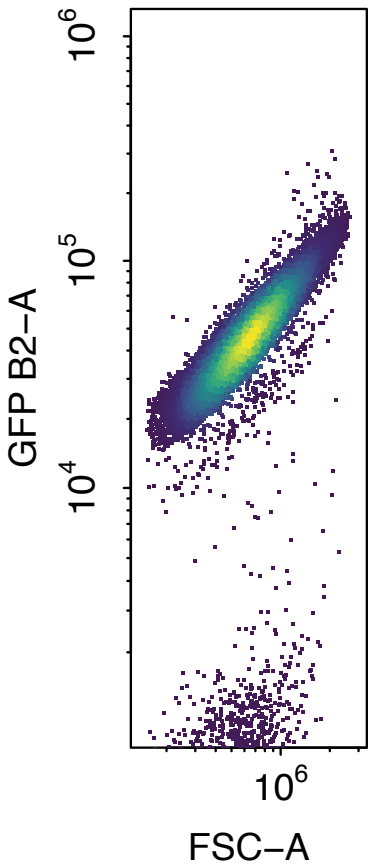

Generation 37

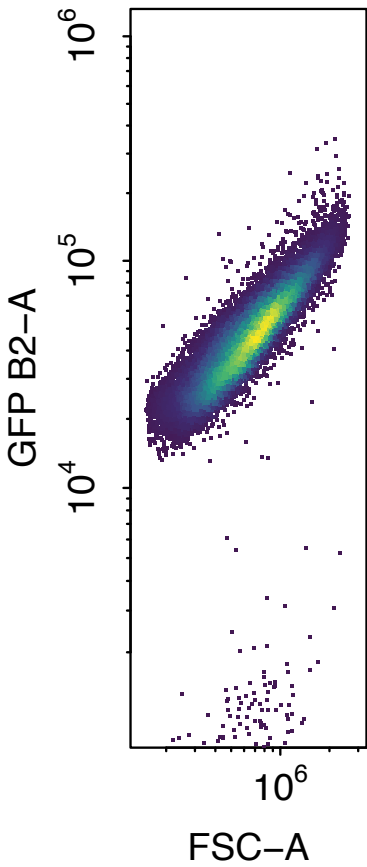

Key

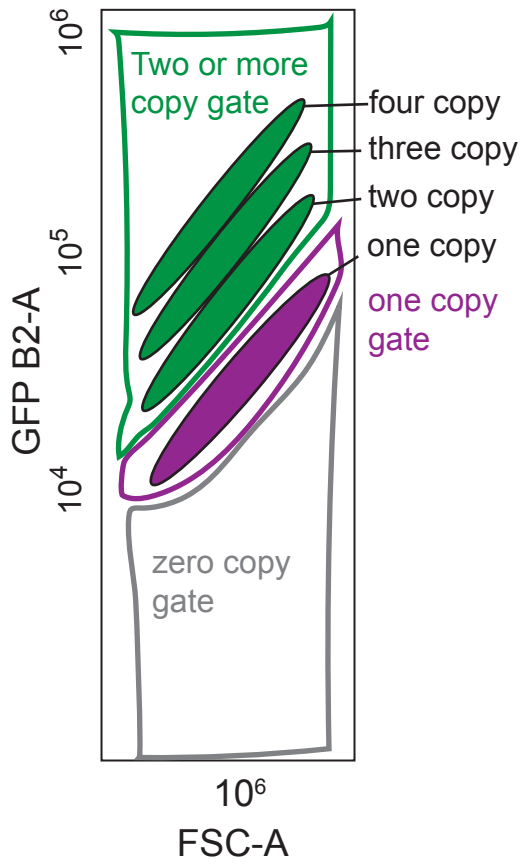

# ALL $\Delta$ population 4

Generation 50

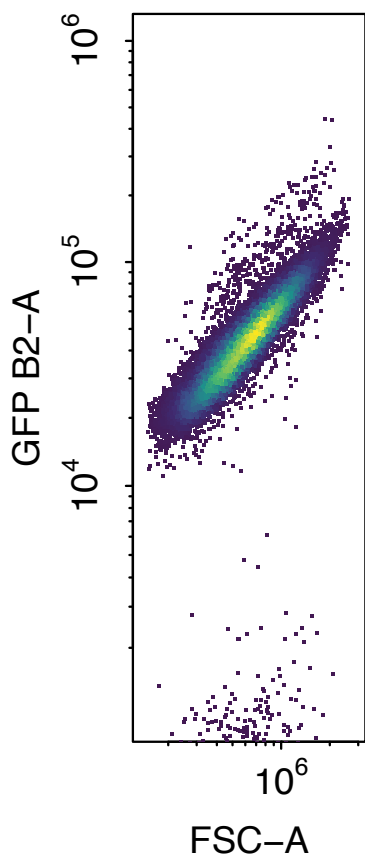

Generation 58

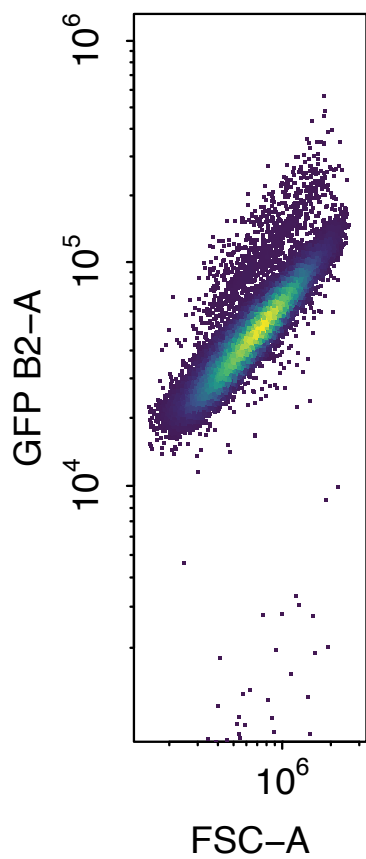

Generation 66

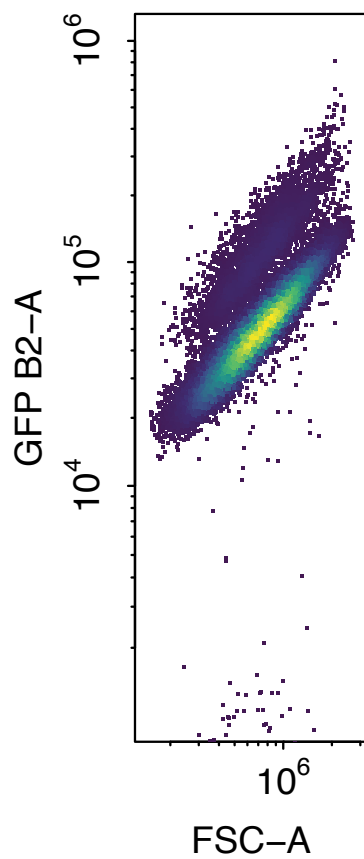

Generation 79

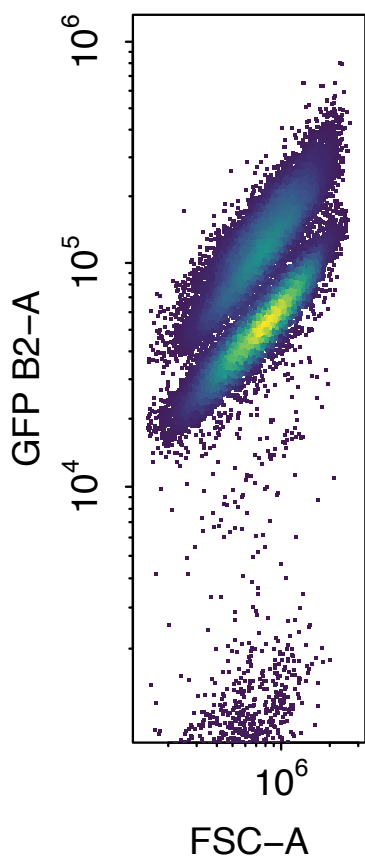

Generation 87

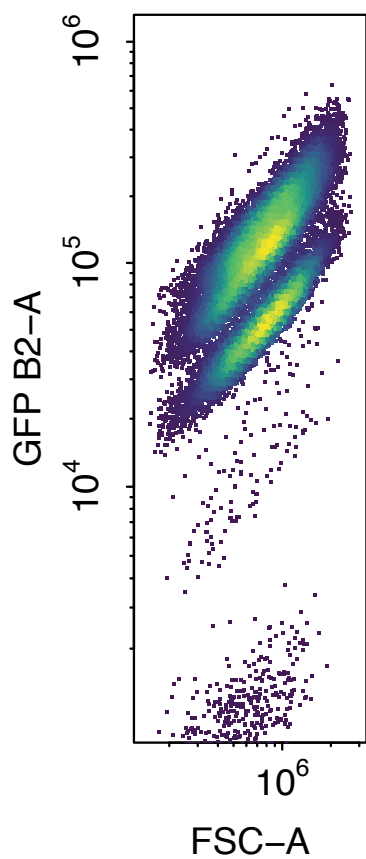

Key

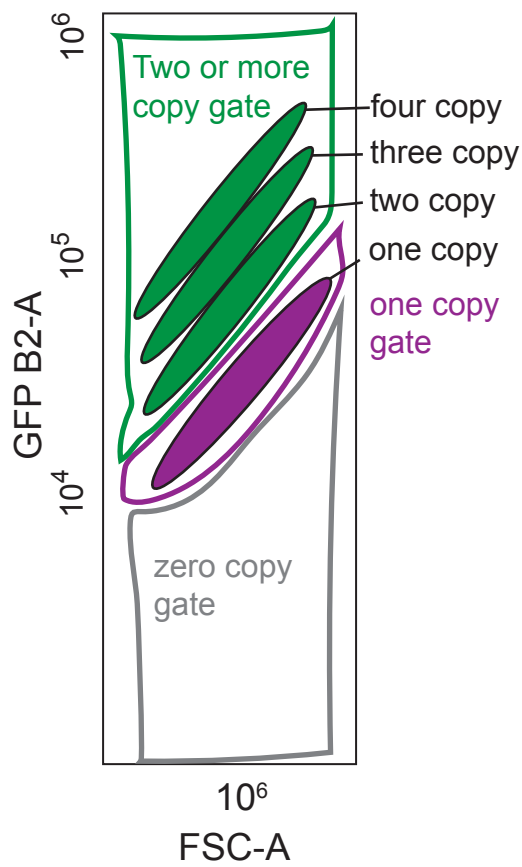

# ALL $\Delta$ population 4

Generation 95

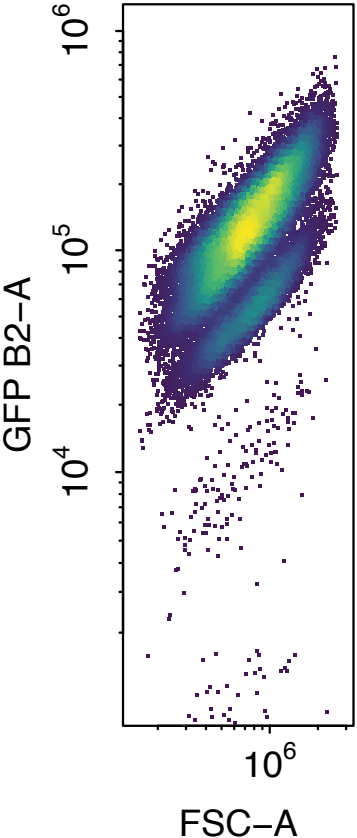

Generation 108

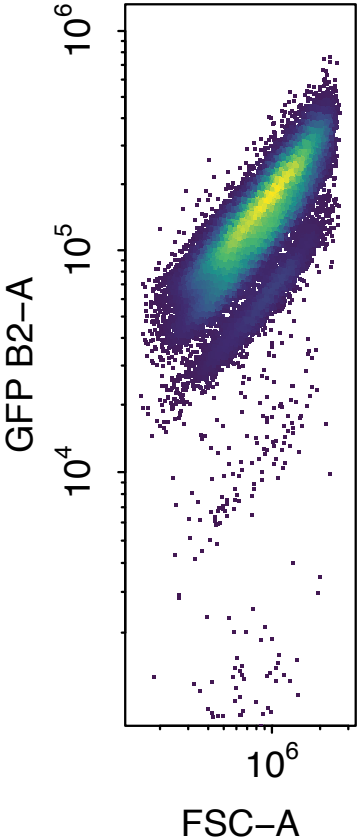

Generation 116

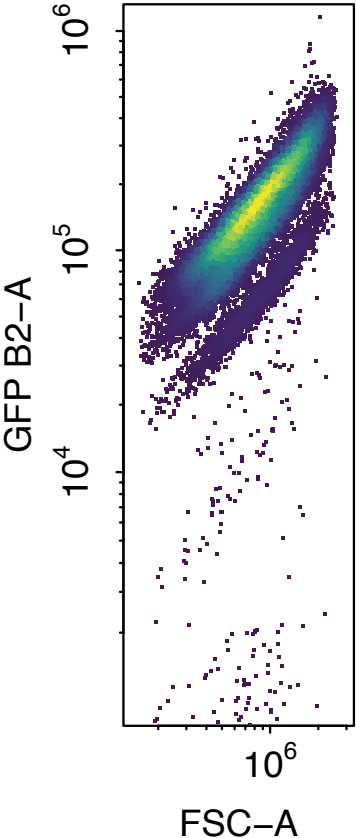

Generation 124

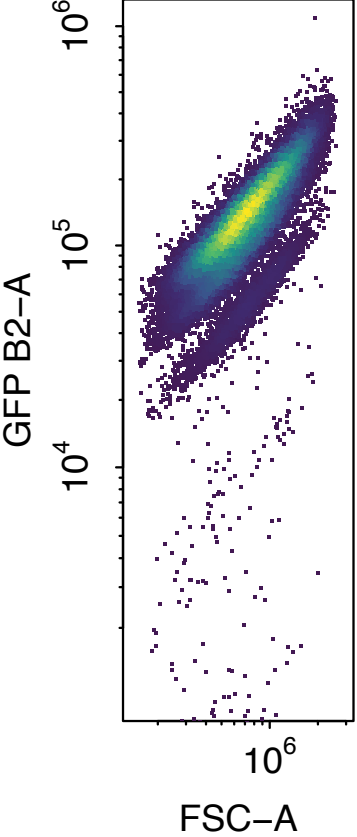

Generation 137

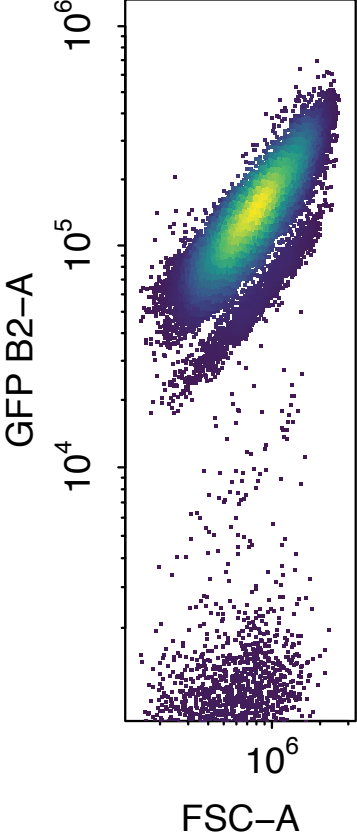

Key

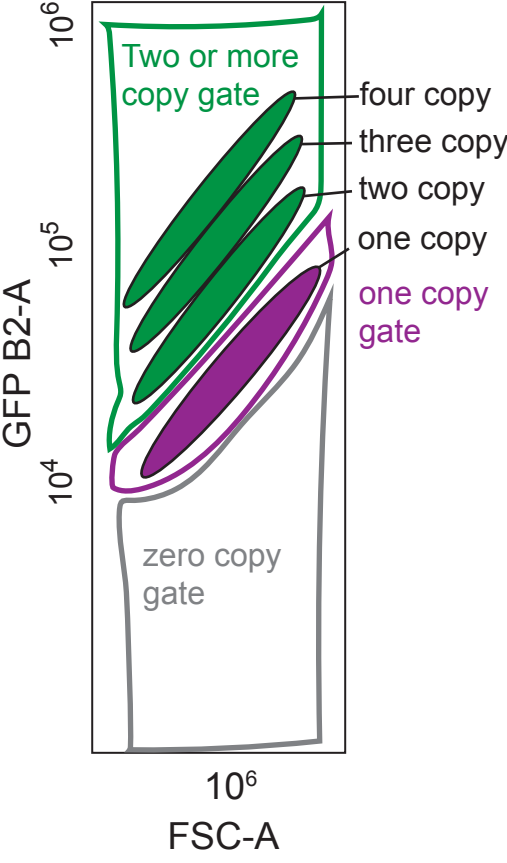

# ALL $\Delta$ population 5

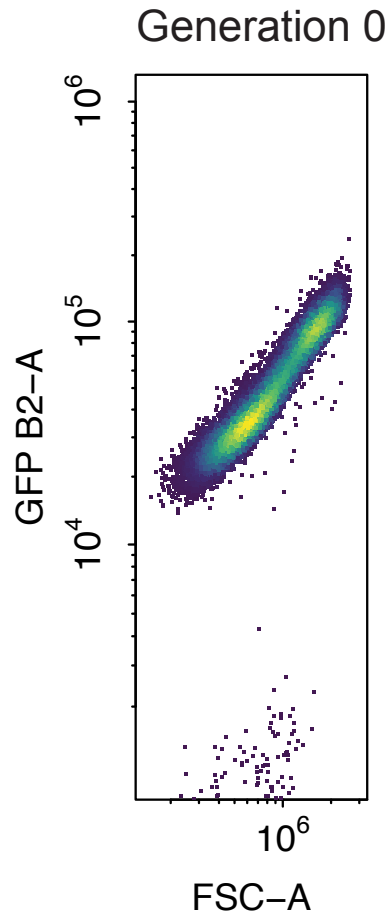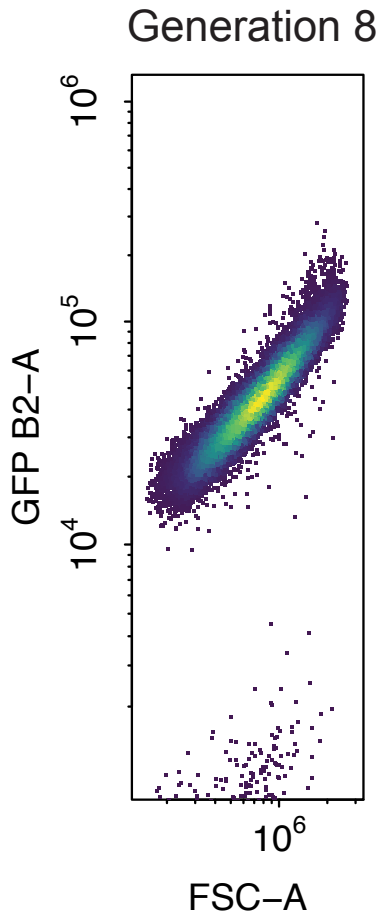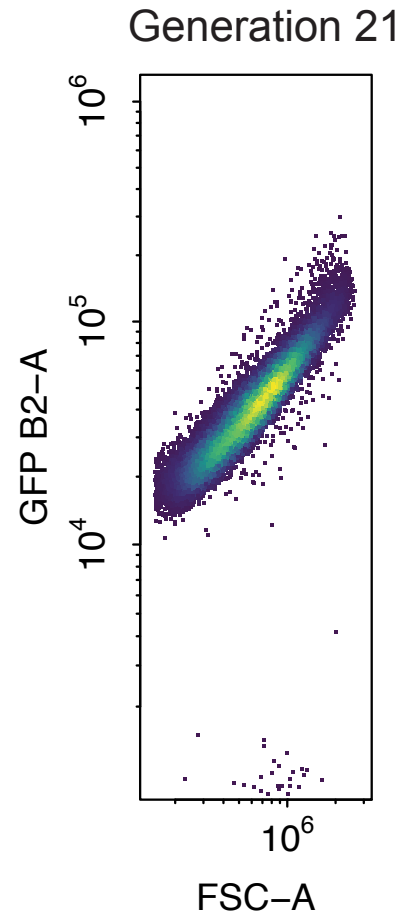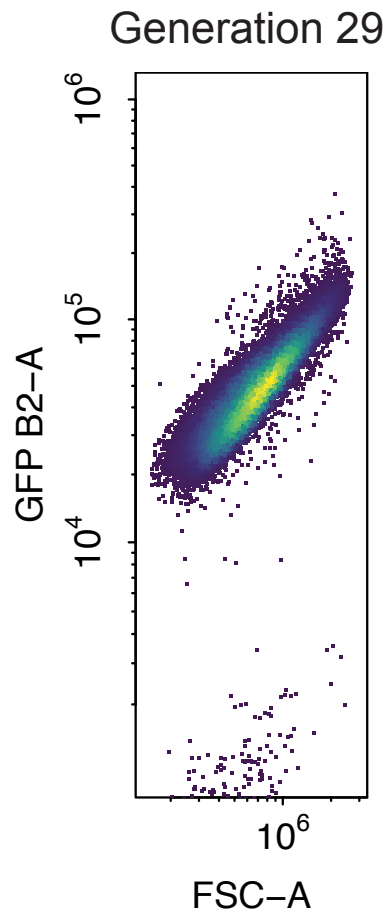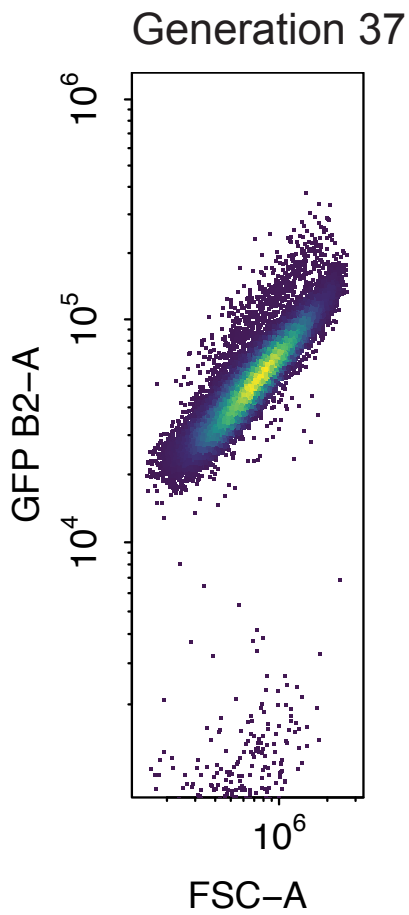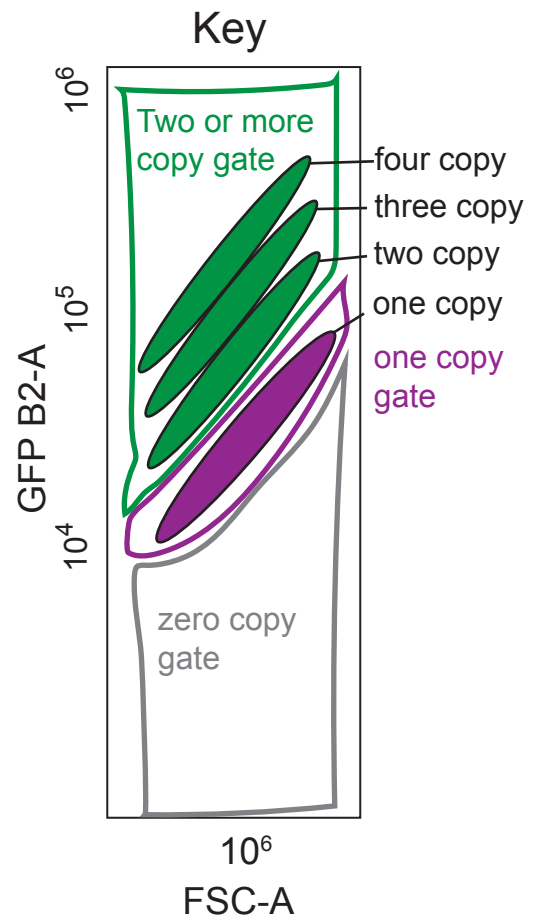

# ALL $\Delta$ population 5

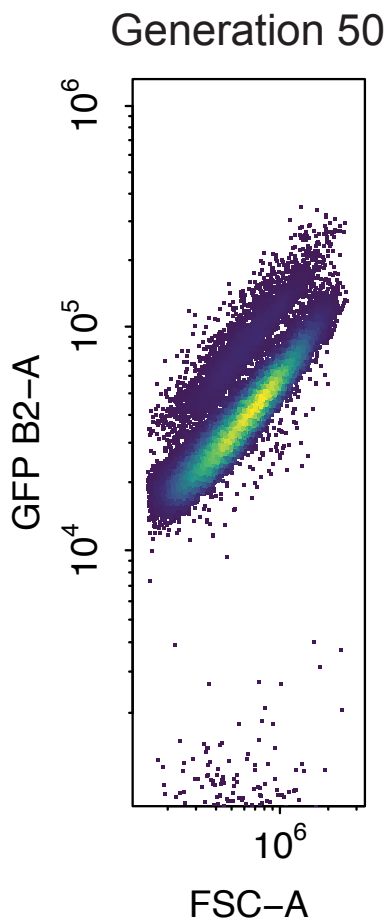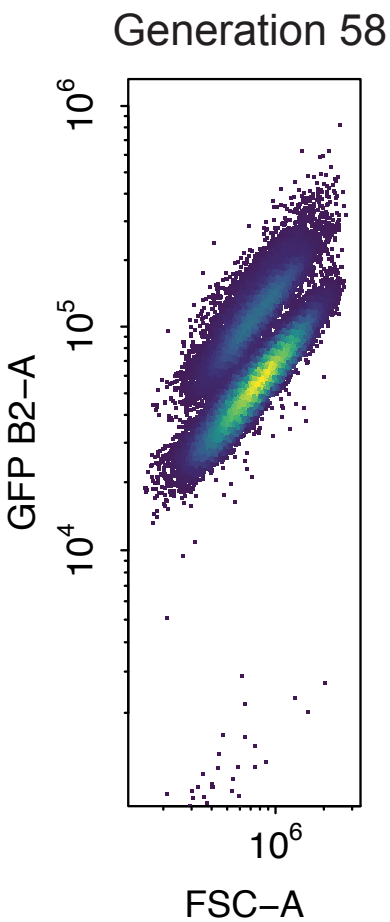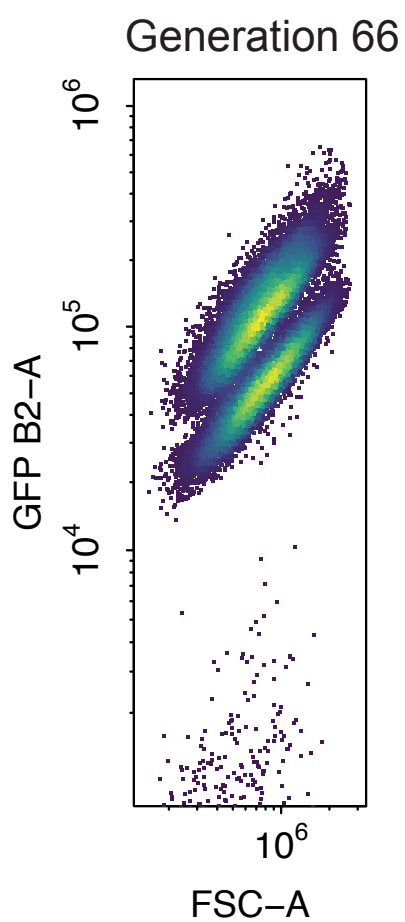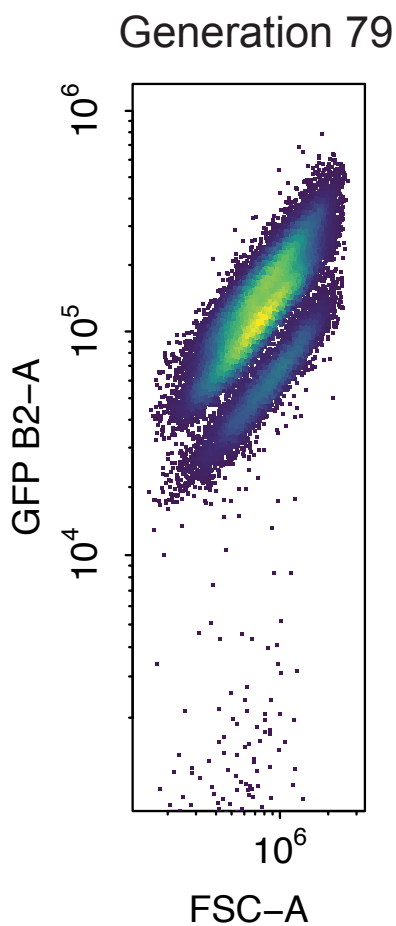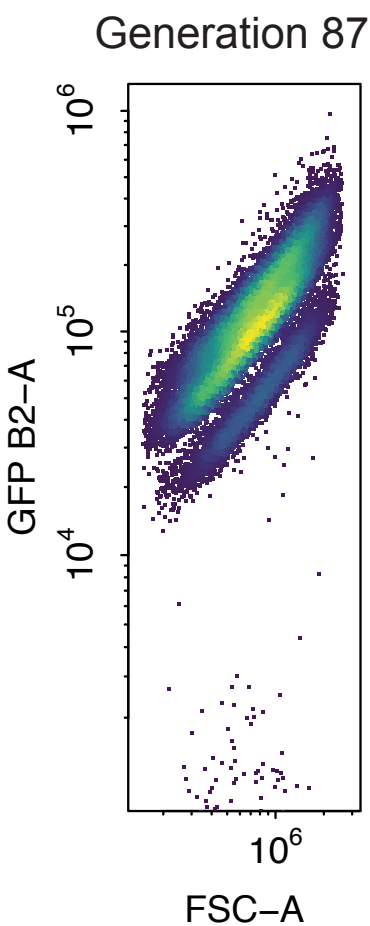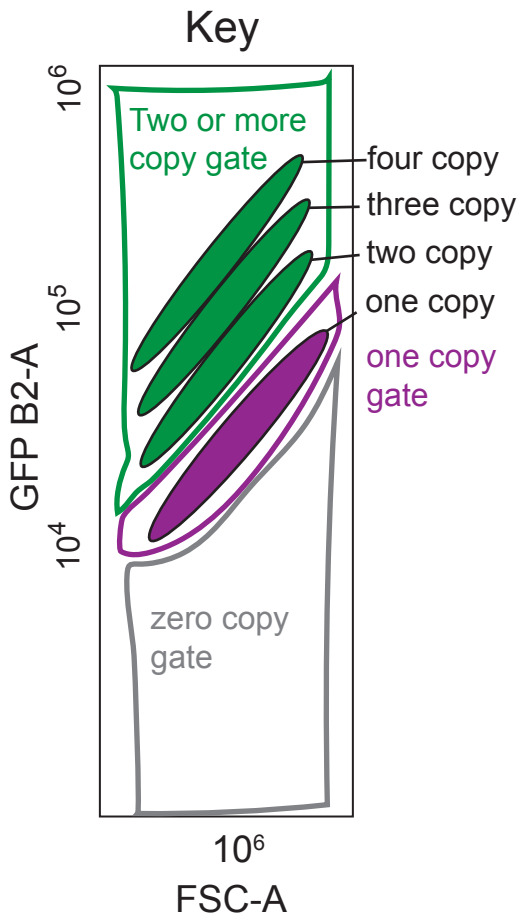

# ALL $\Delta$ population 5

Generation 95

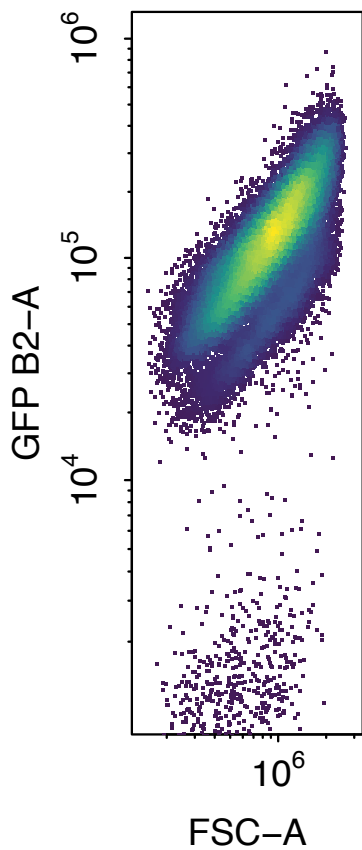

Generation 108

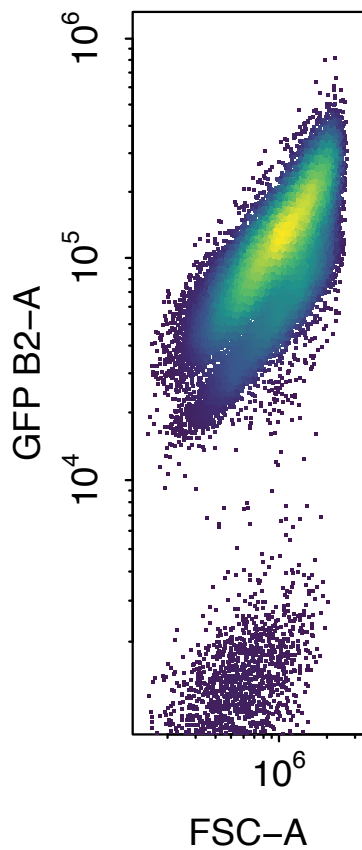

Generation 116

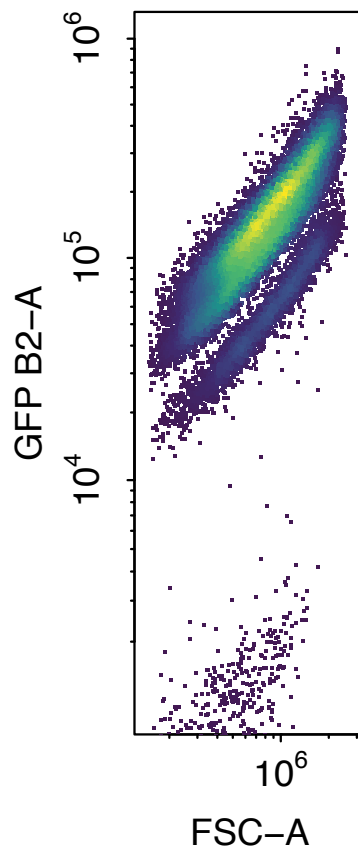

Generation 124

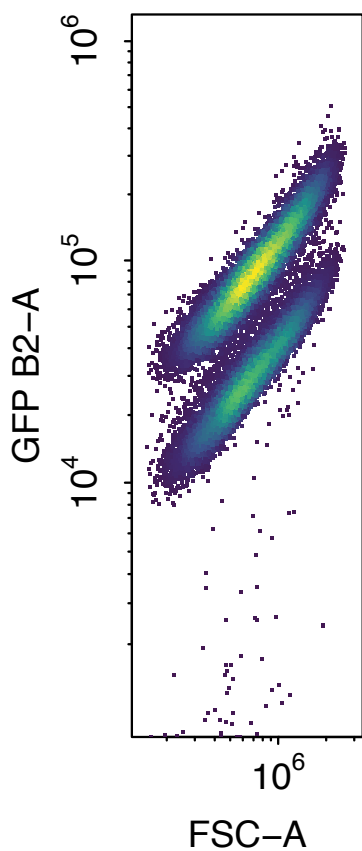

Generation 137

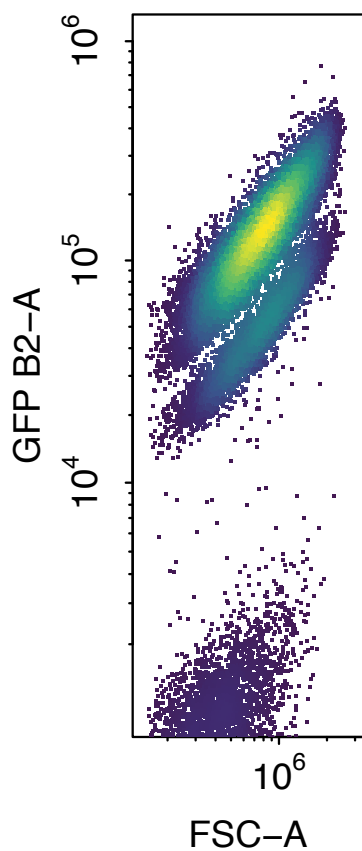

Key

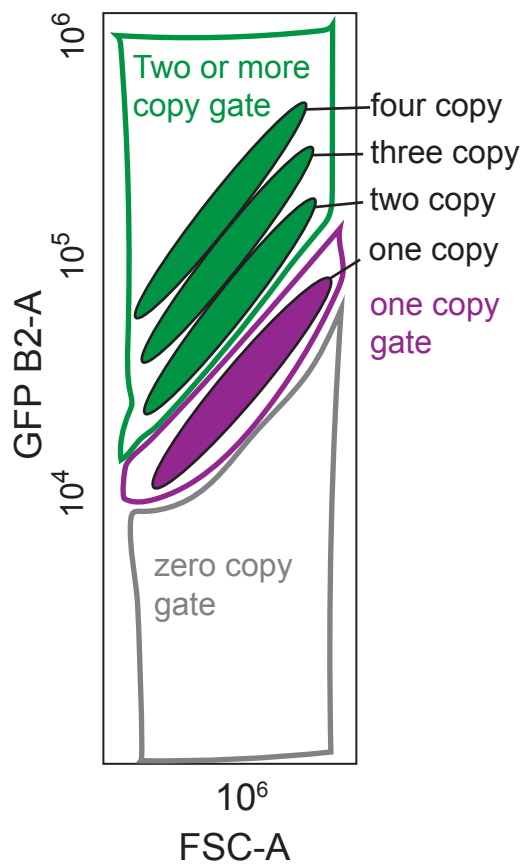



# ALL $\Delta$ population 6

Generation 0

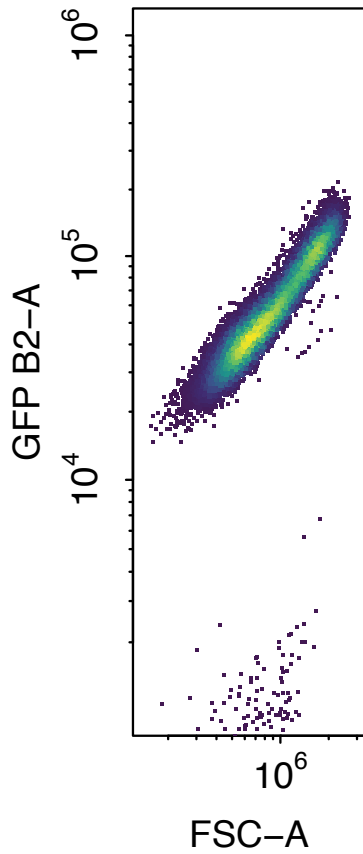

Generation 8

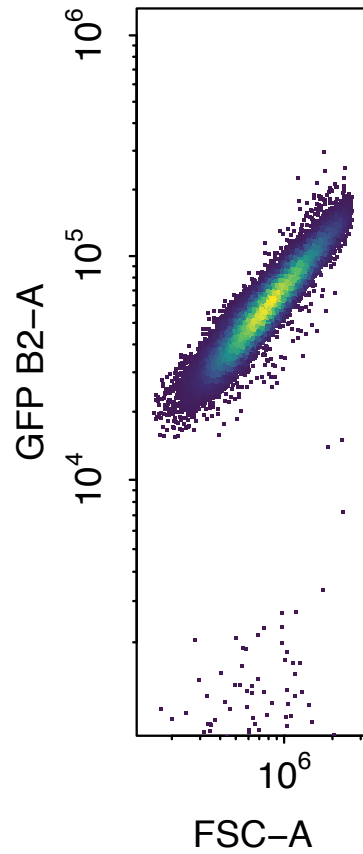

Generation 21

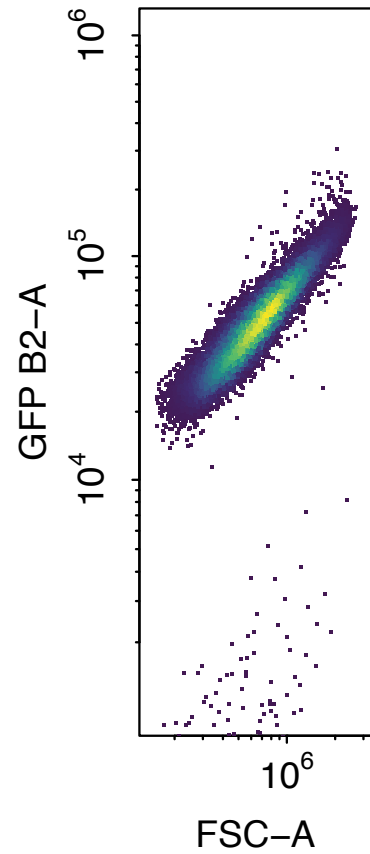

Generation 29

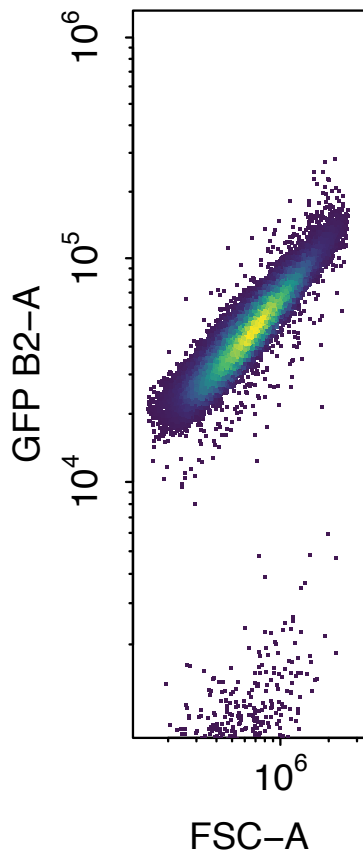

Generation 37

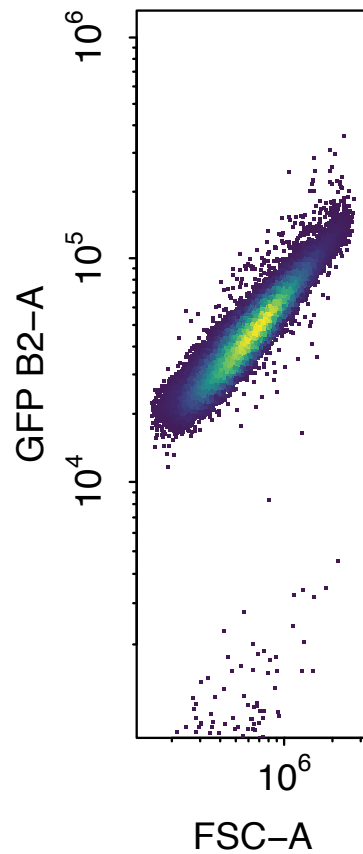

Key

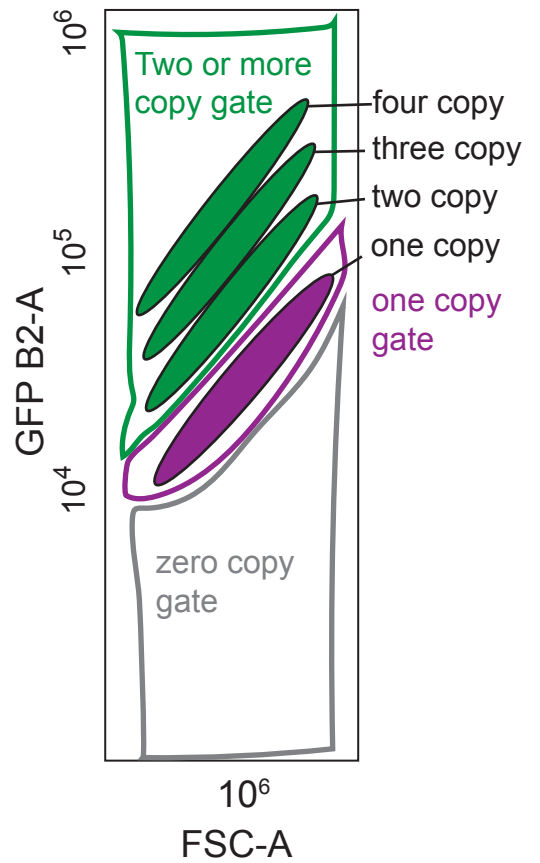

# ALL $\Delta$ population 6

Generation 50

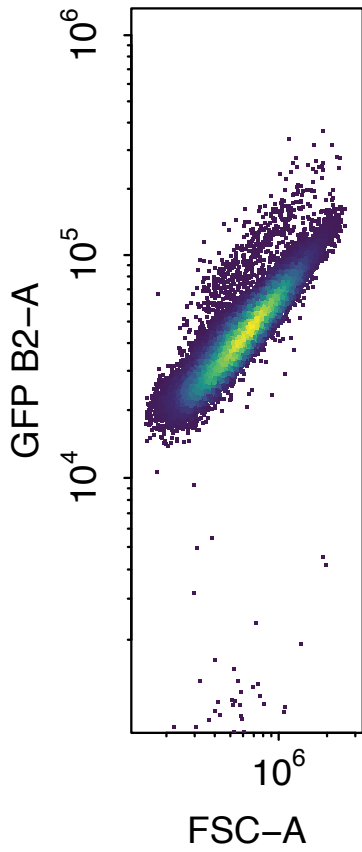

Generation 58

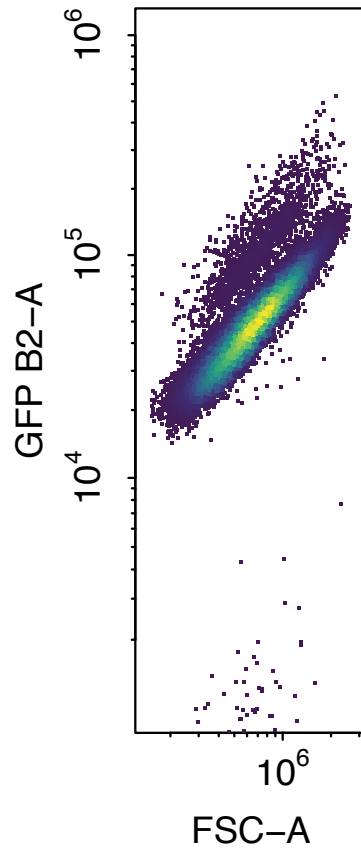

Generation 66

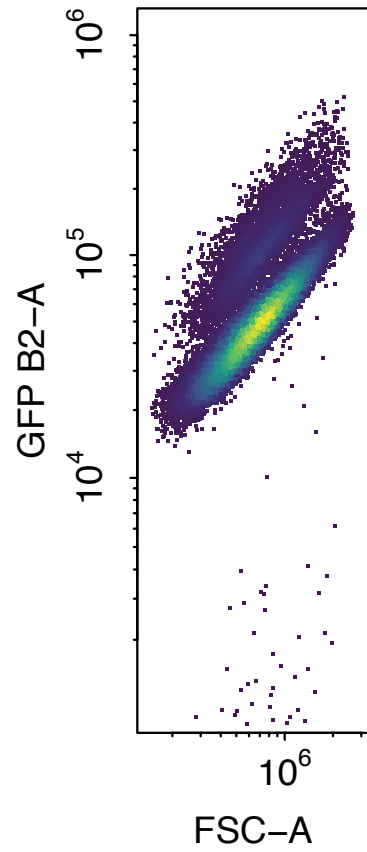

Generation 79

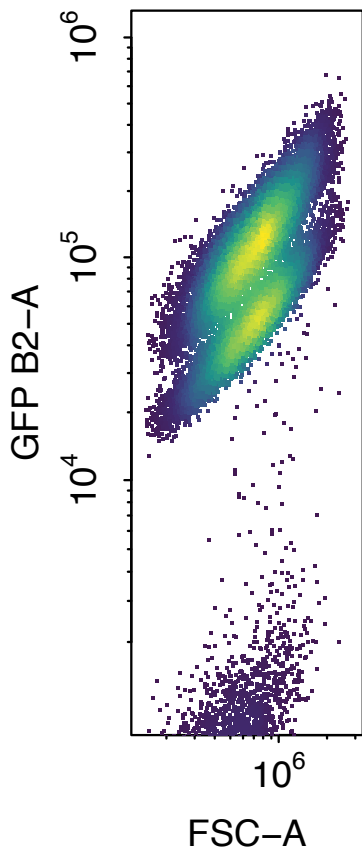

Generation 87

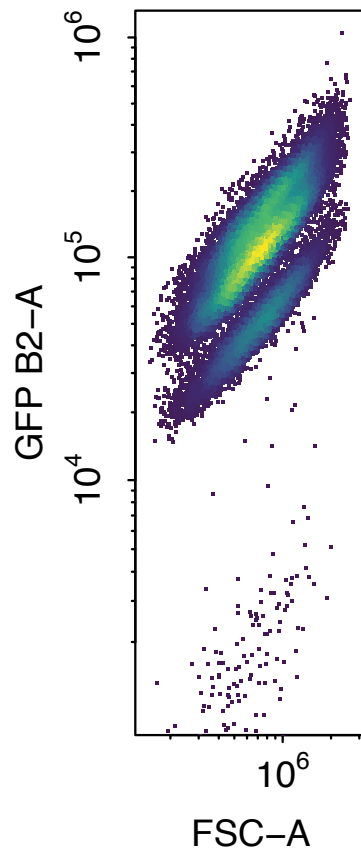

Key

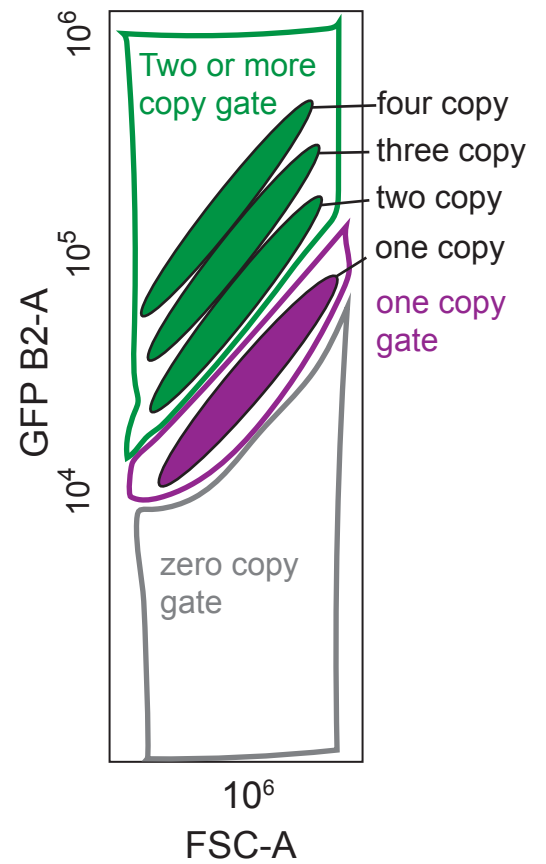

# ALLΔ population 6

Generation 95

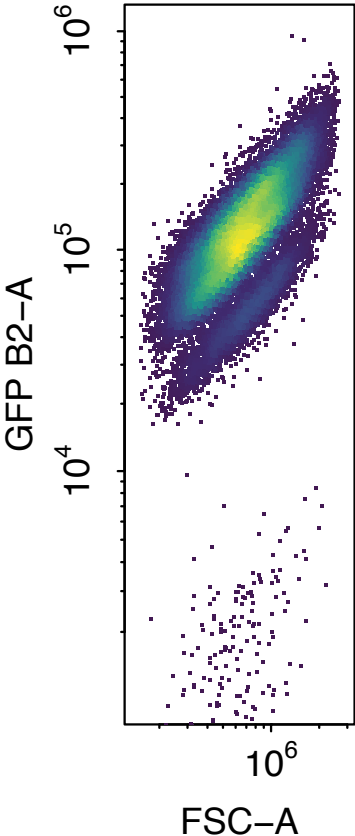

Generation 108

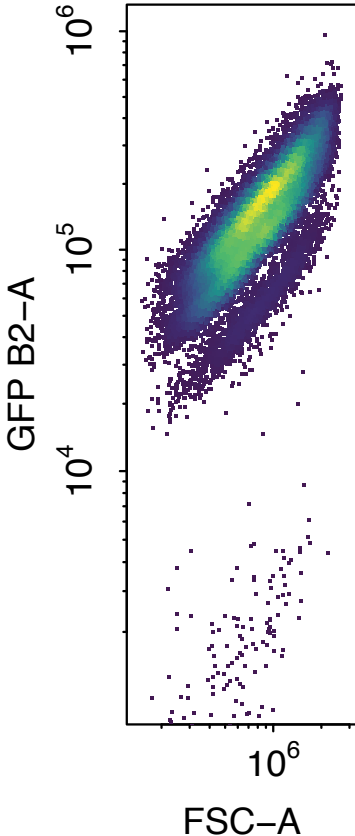

Generation 116

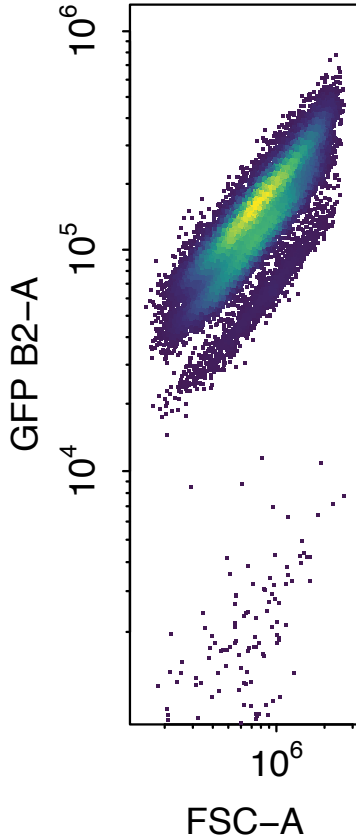

Generation 124

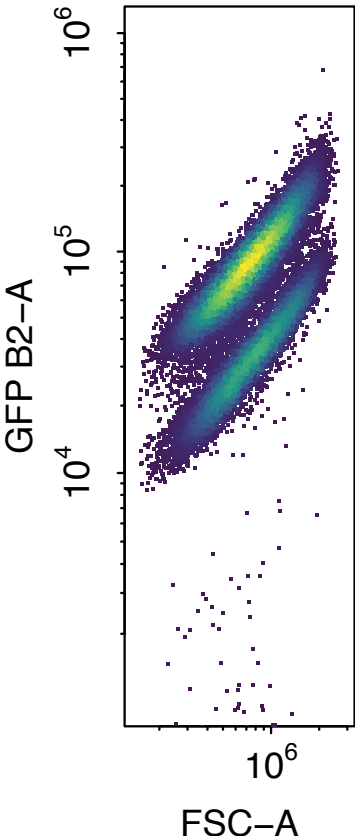

Generation 137

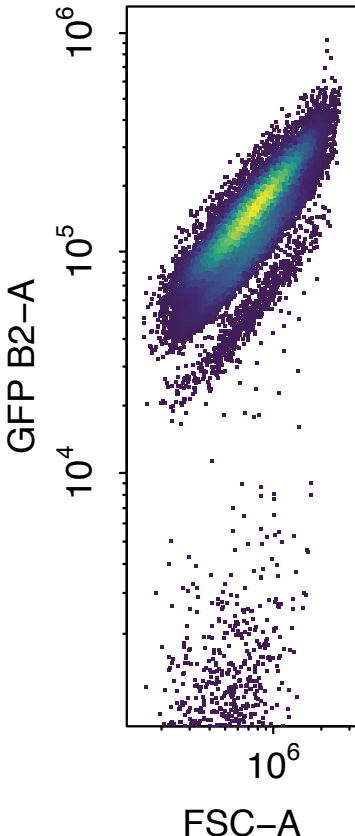

Key

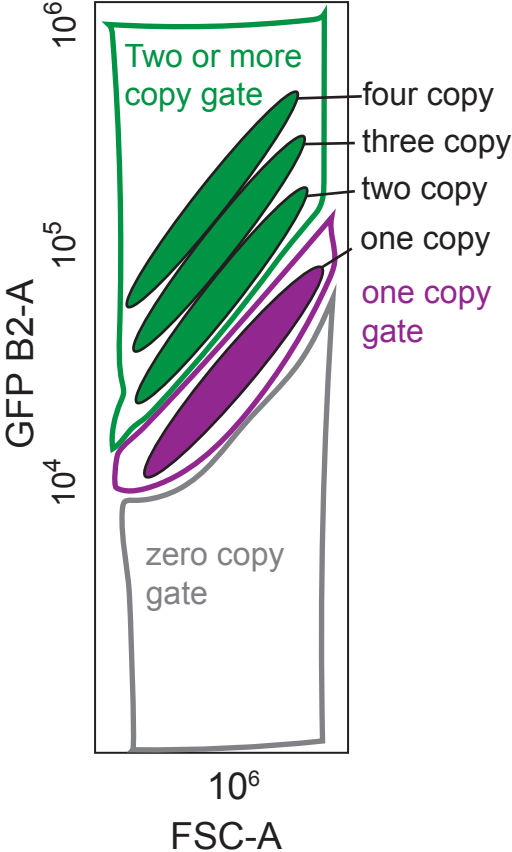

# ALL $\Delta$ population 7

Generation 0

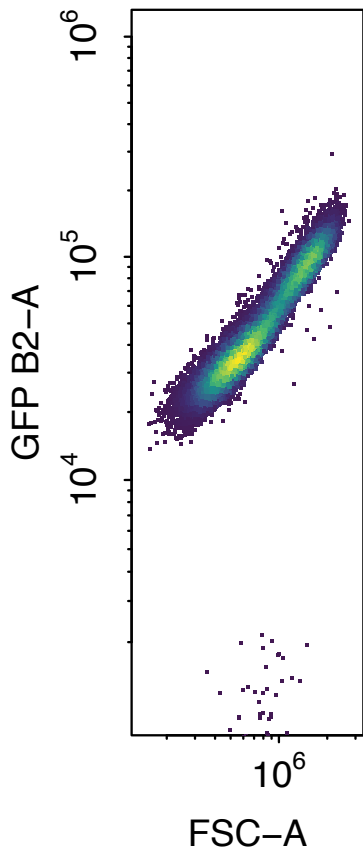

Generation 8

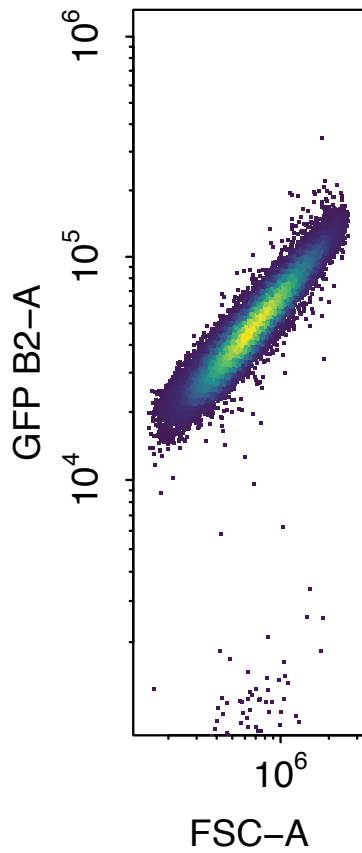

Generation 21

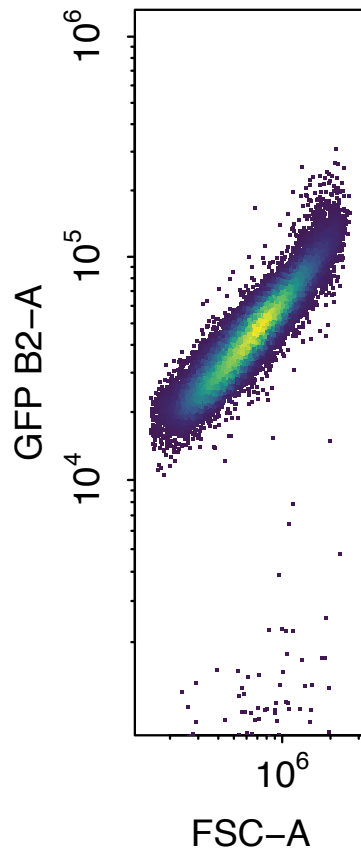

Generation 29

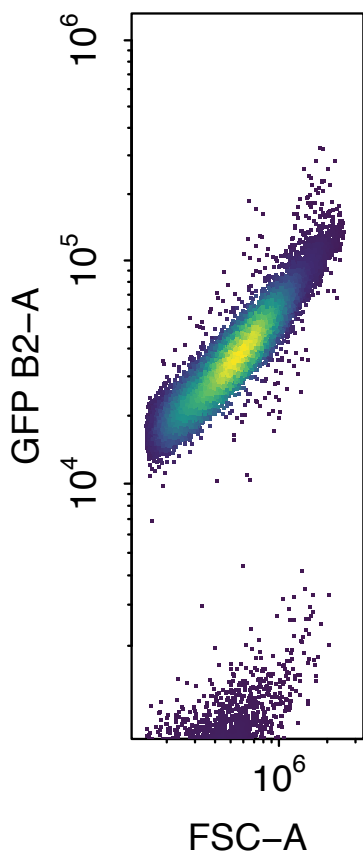

Generation 37

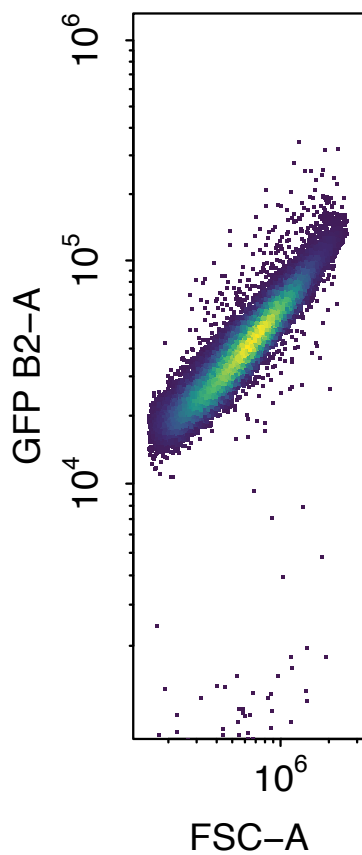

Key

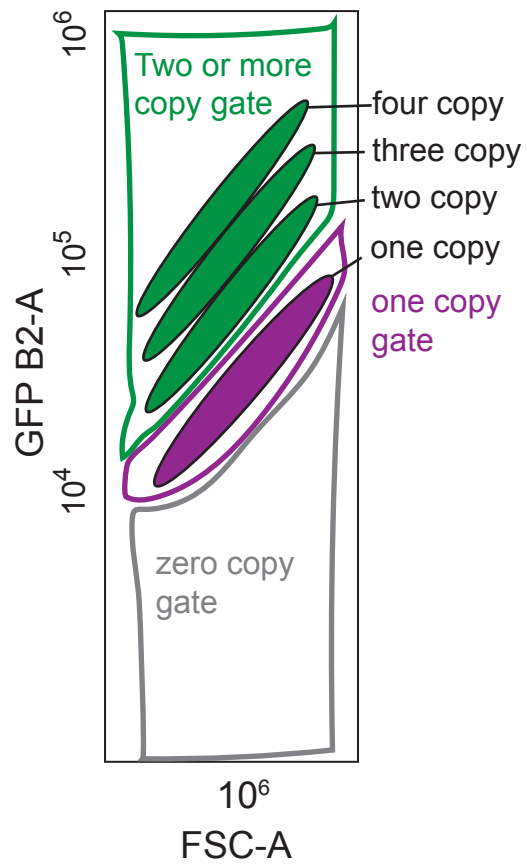

# ALL $\Delta$ population 7

Generation 50

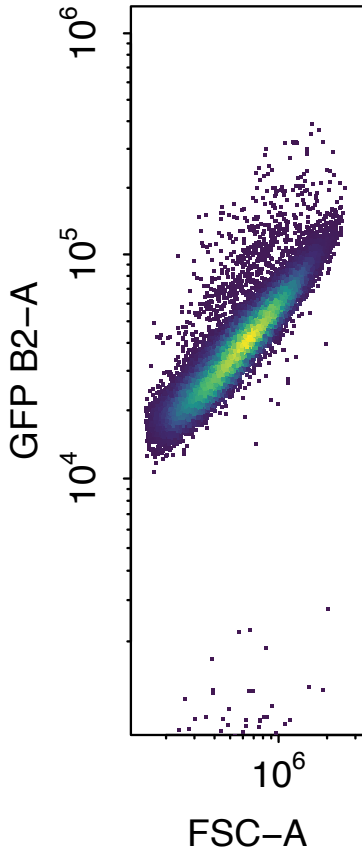

Generation 58

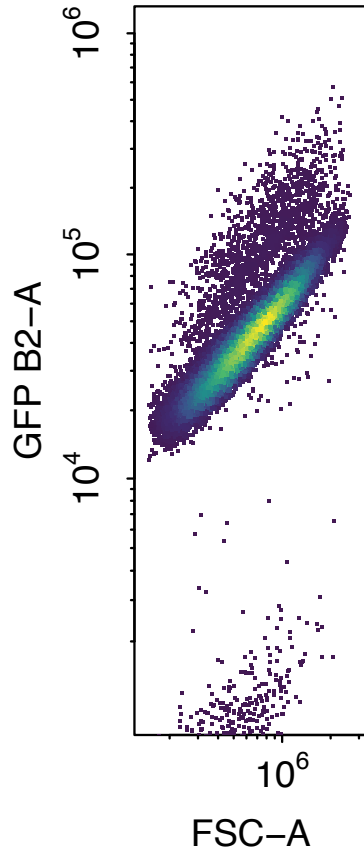

Generation 66

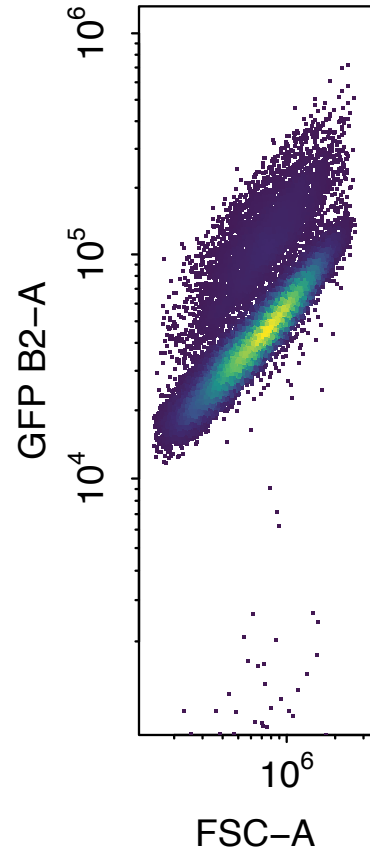

Generation 79

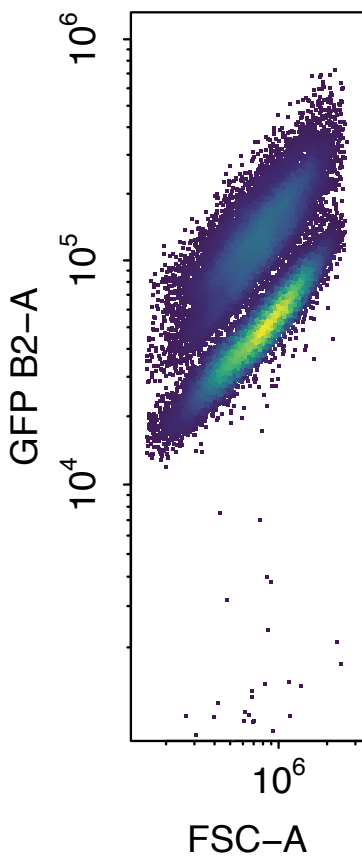

Generation 87

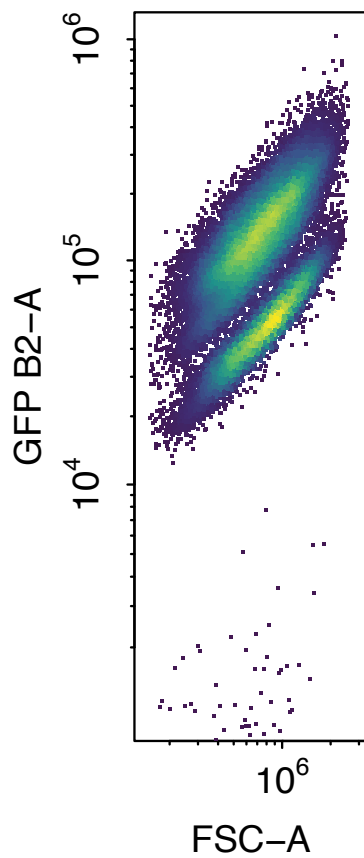

Key

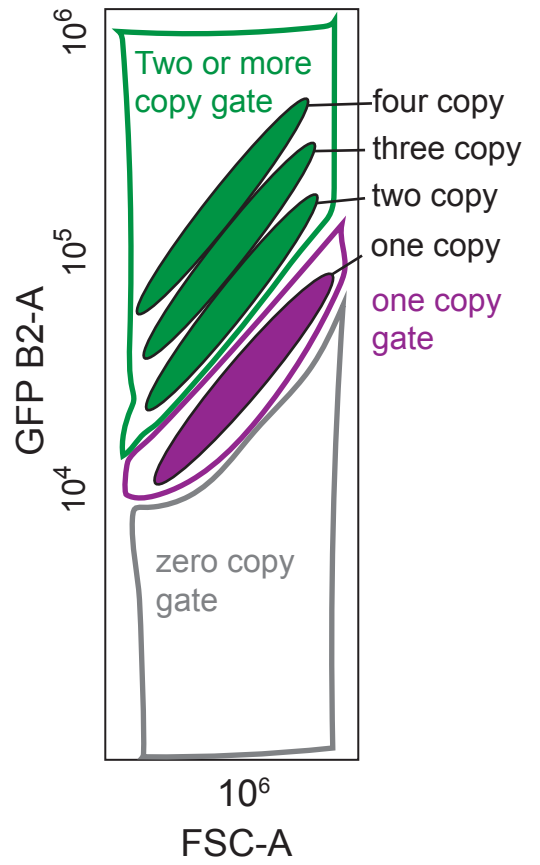

# ALL $\Delta$ population 7

Generation 95

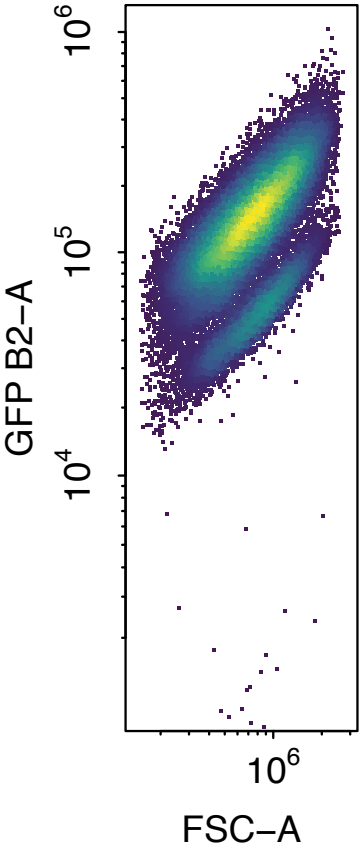

Generation 108

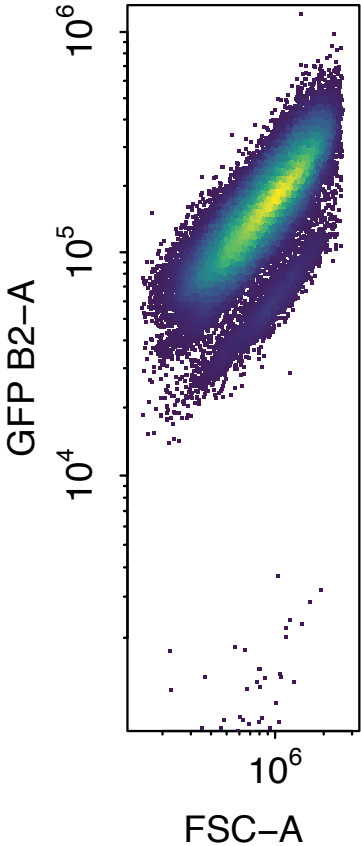

Generation 116

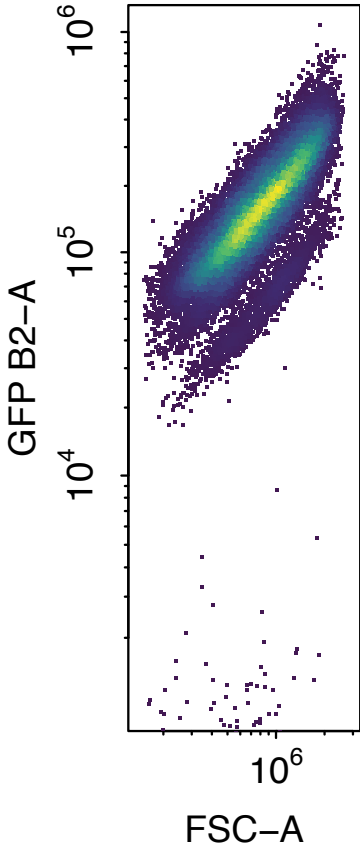

Generation 124

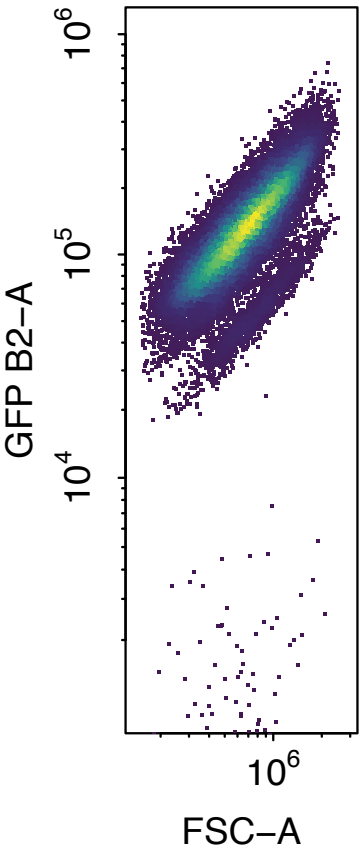

Generation 137

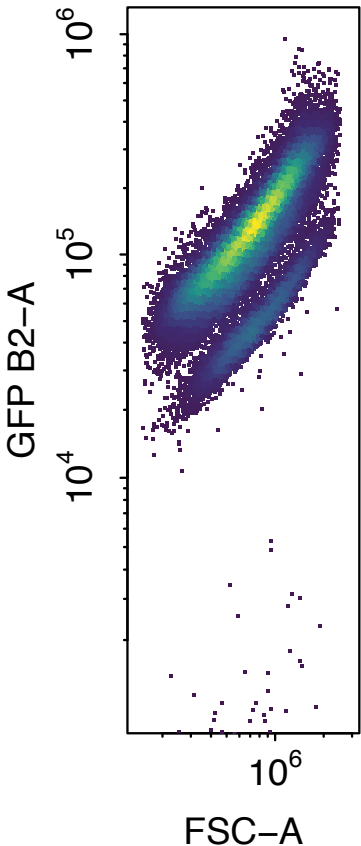

Key

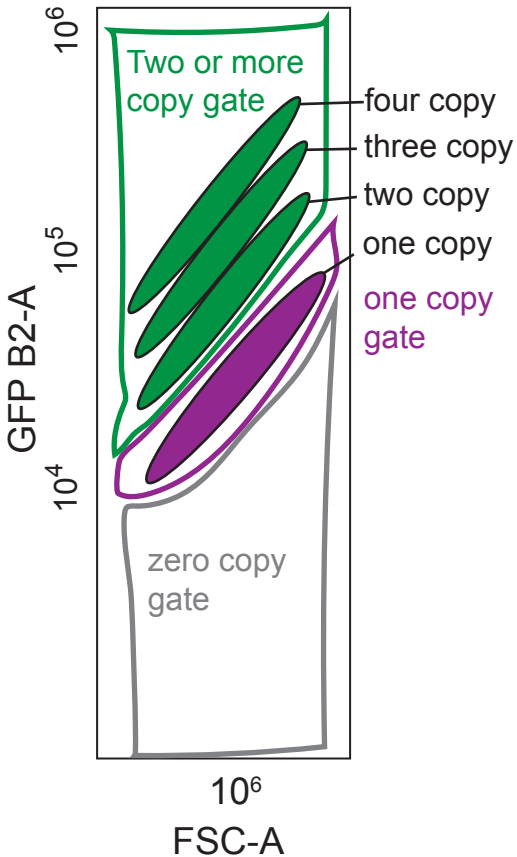

# ALL $\Delta$ population 8

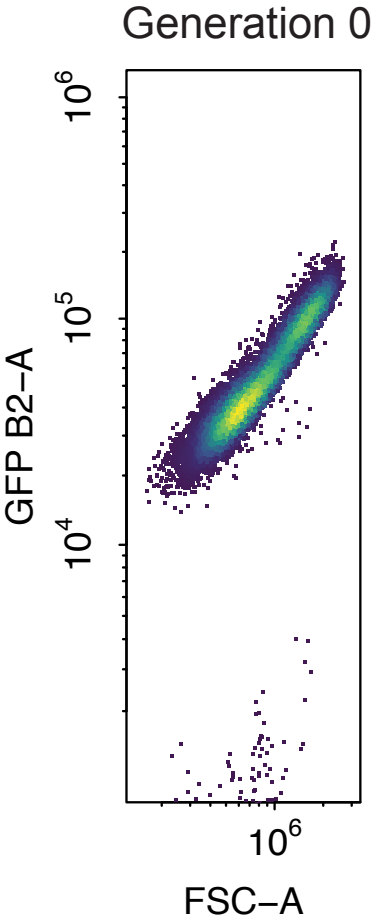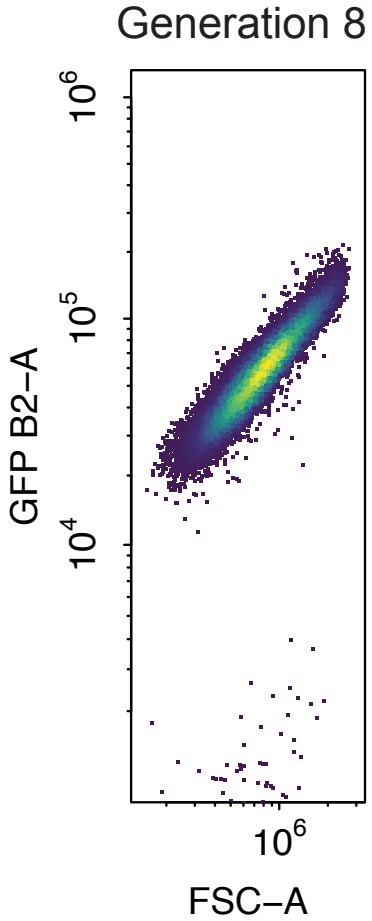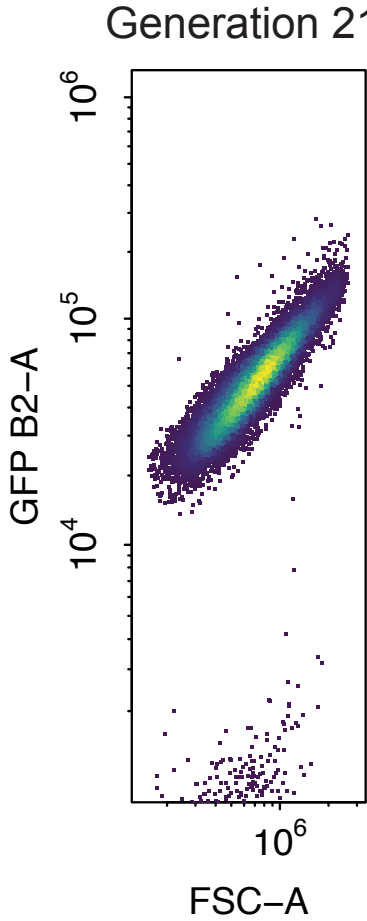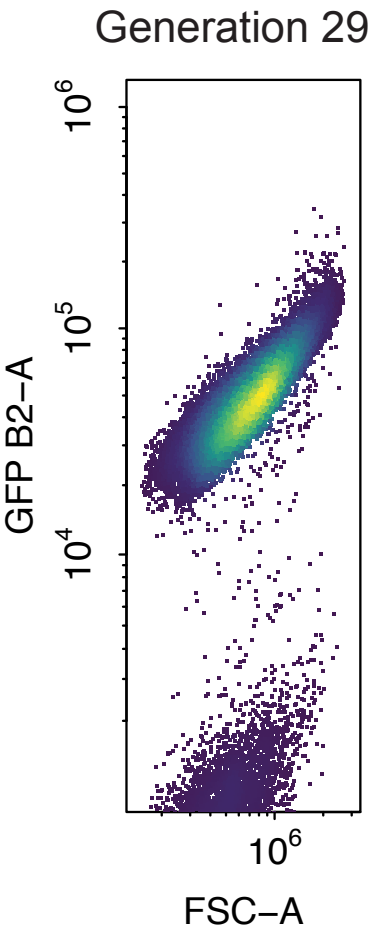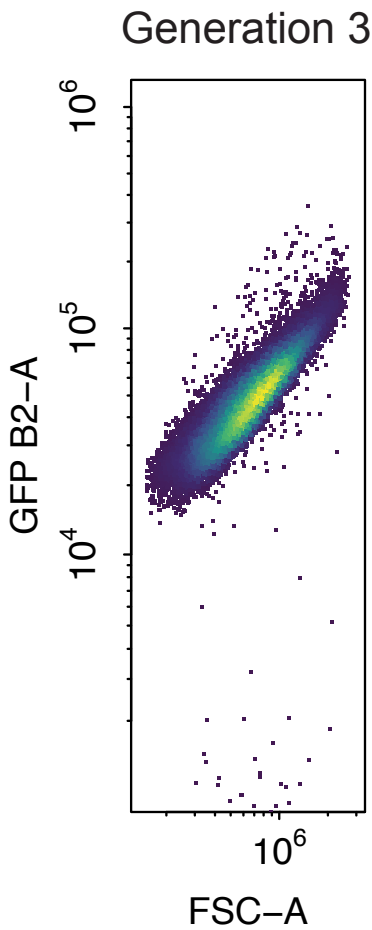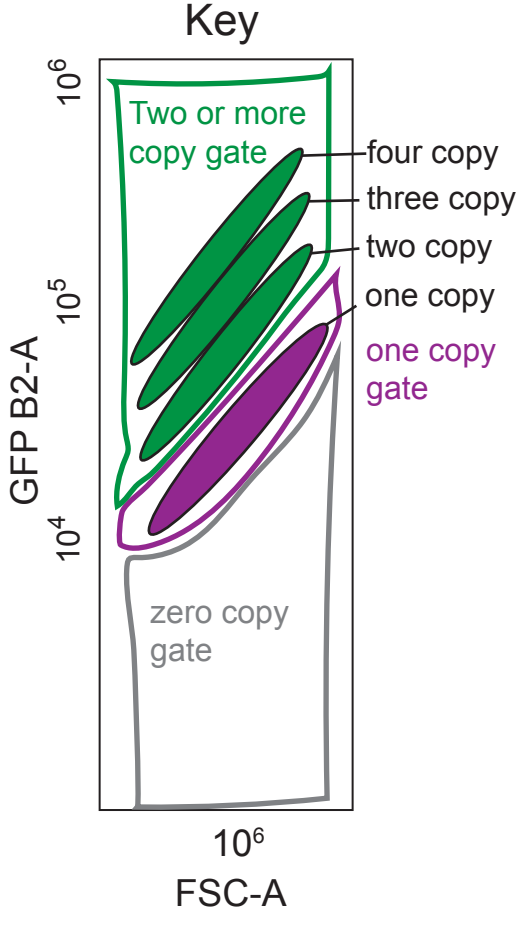

# ALL $\Delta$ population 8

Generation 50

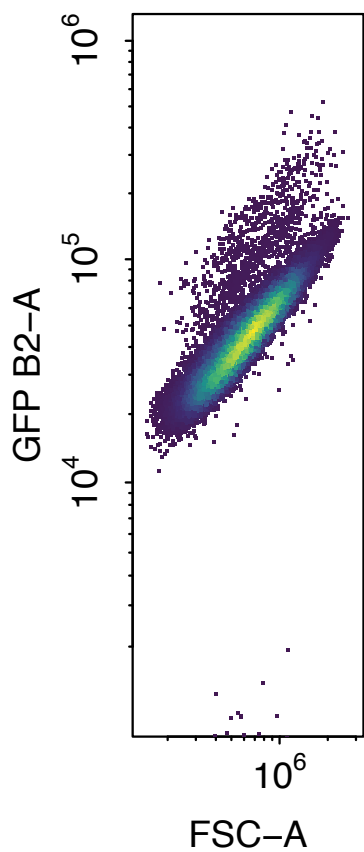

Generation 58

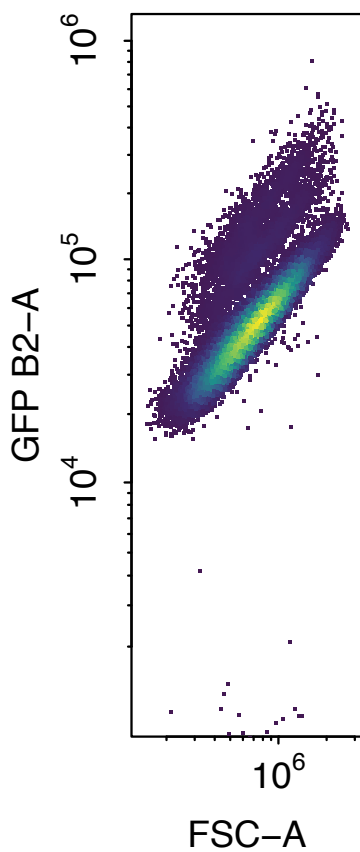

Generation 66

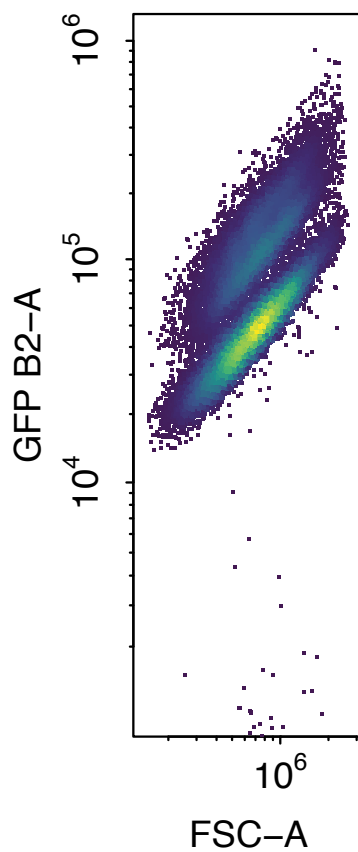

Generation 79

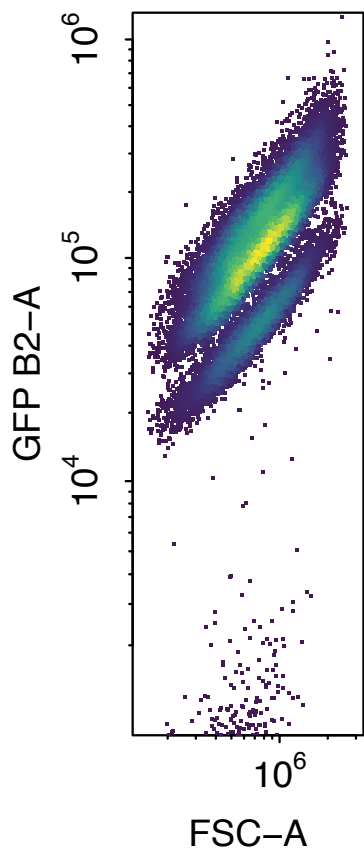

Generation 87

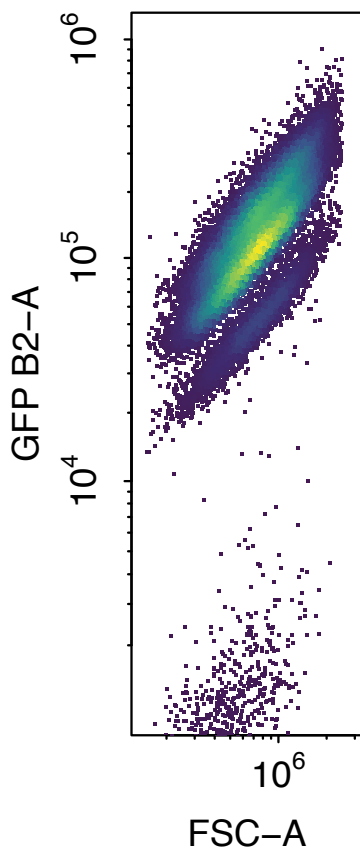

Key

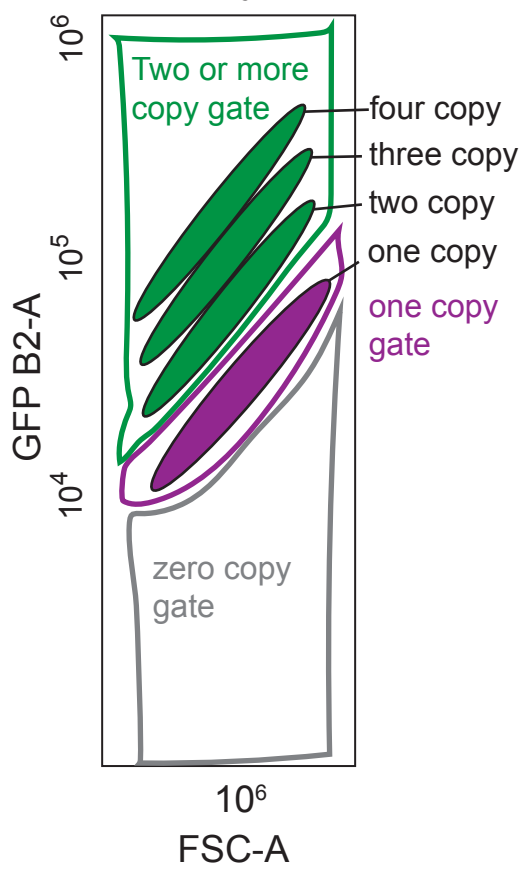



# ALL $\Delta$ population 8

Generation 95

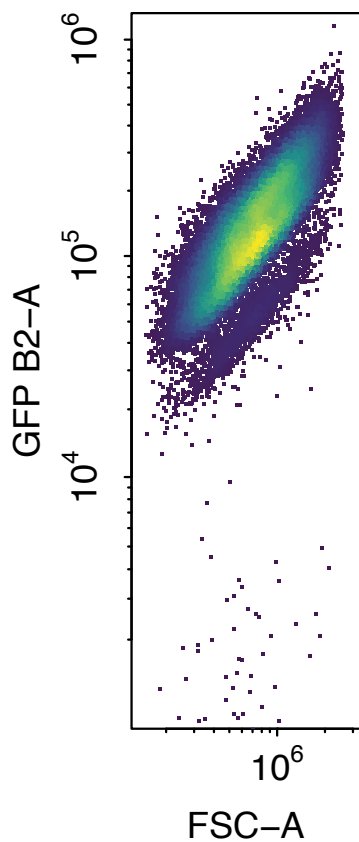

Generation 108

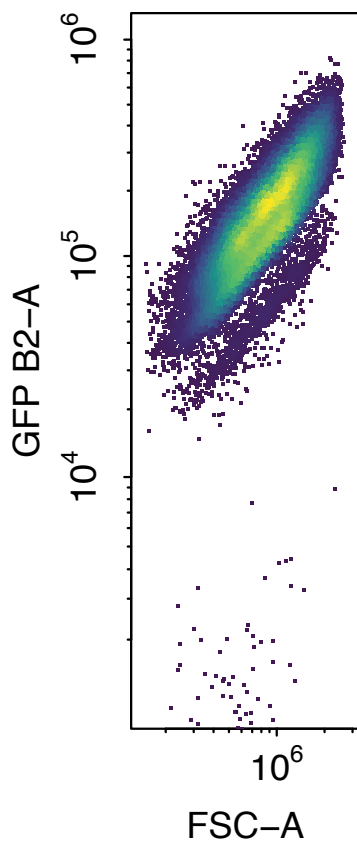

Generation 116

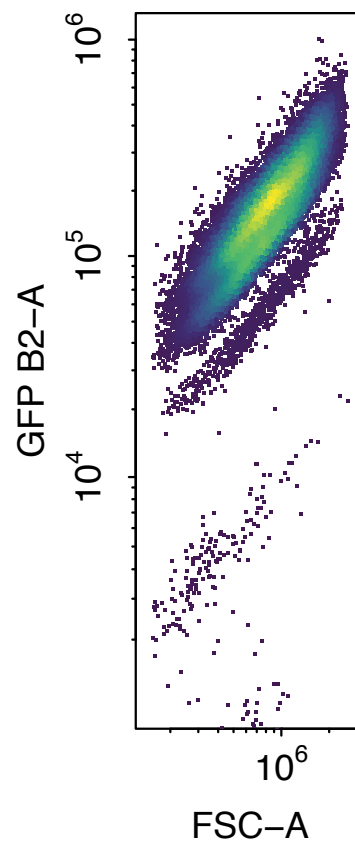

Generation 124

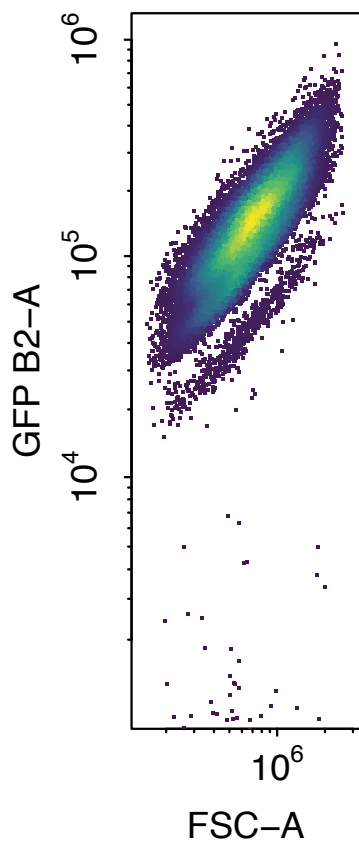

Generation 137

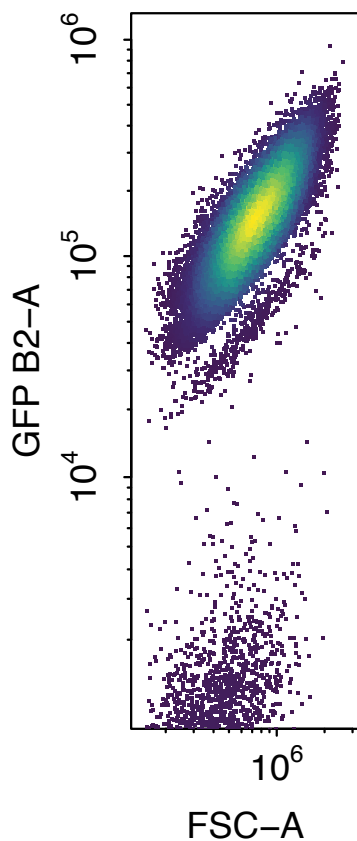

Key

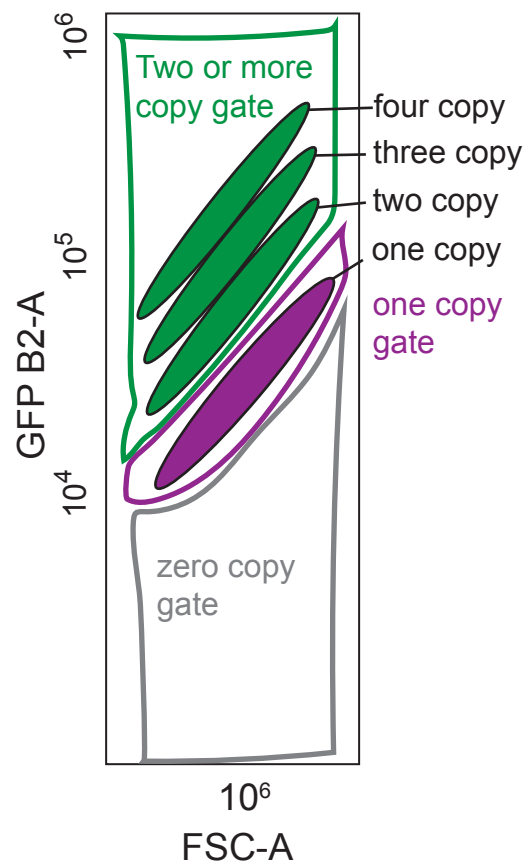

Supplement: fig2-data1 [file elife-98934-fig2-data1-v1.pdf]
