# Supplementary material for: Template switching during DNA replication is a prevalent source of adaptive gene amplification
Source: eLife journal article supplement (doi:10.7554/elife.98934), 2024-08-02

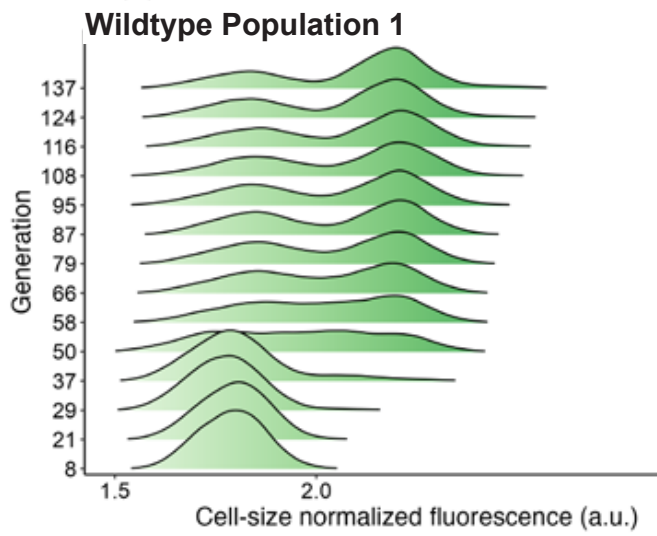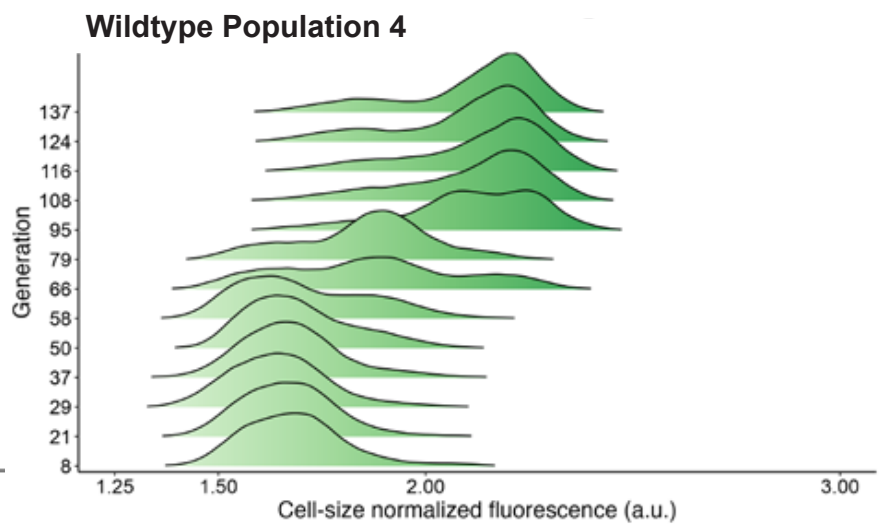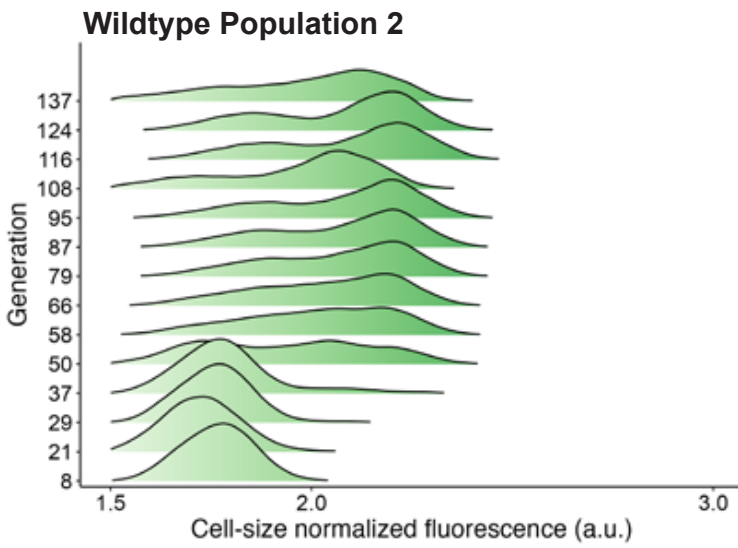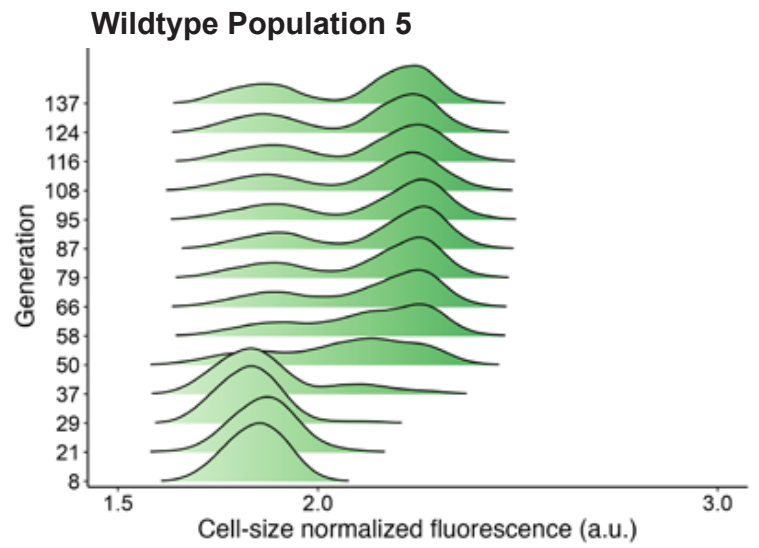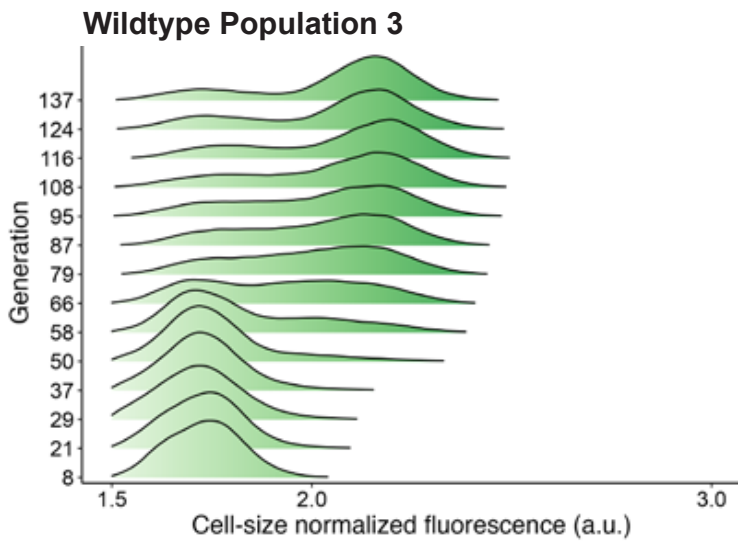

**LTR $\Delta$  Population 1**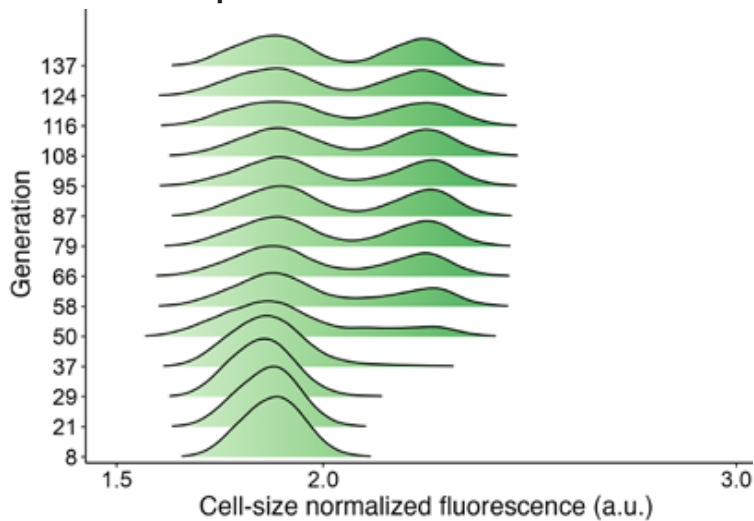**LTR $\Delta$  Population 5**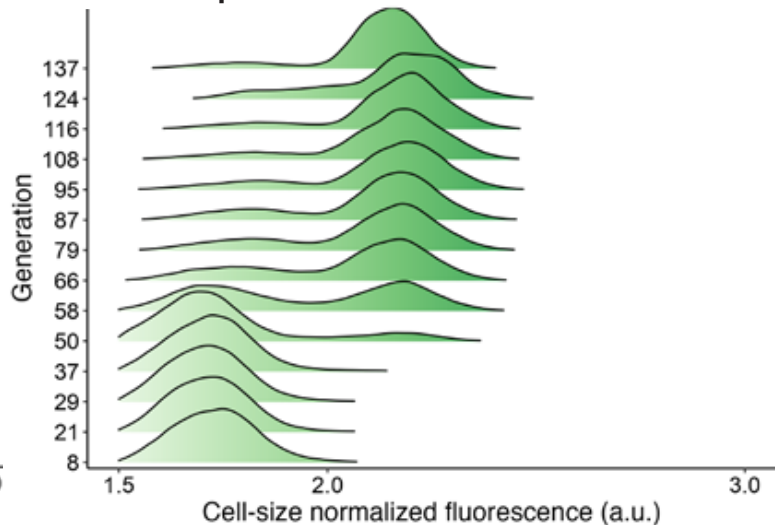**LTR $\Delta$  Population 3**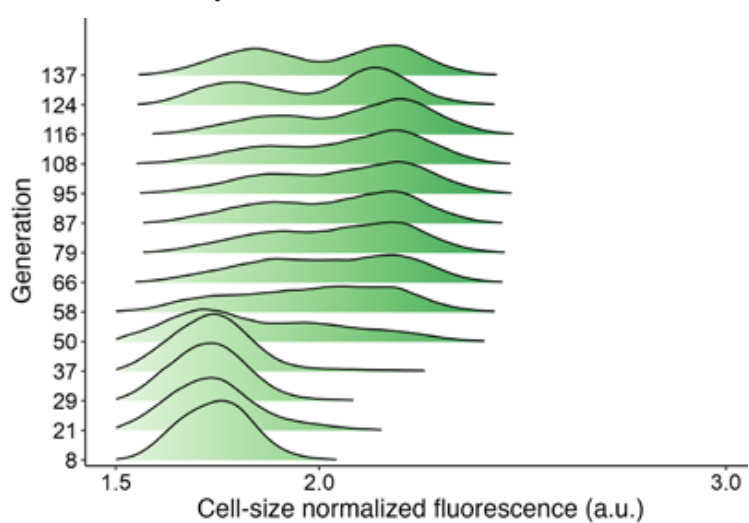**LTR $\Delta$  Population 6**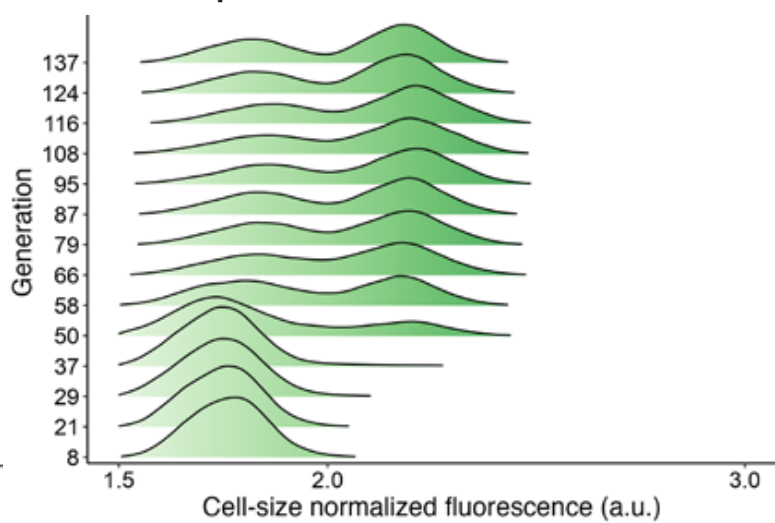**LTR $\Delta$  Population 4**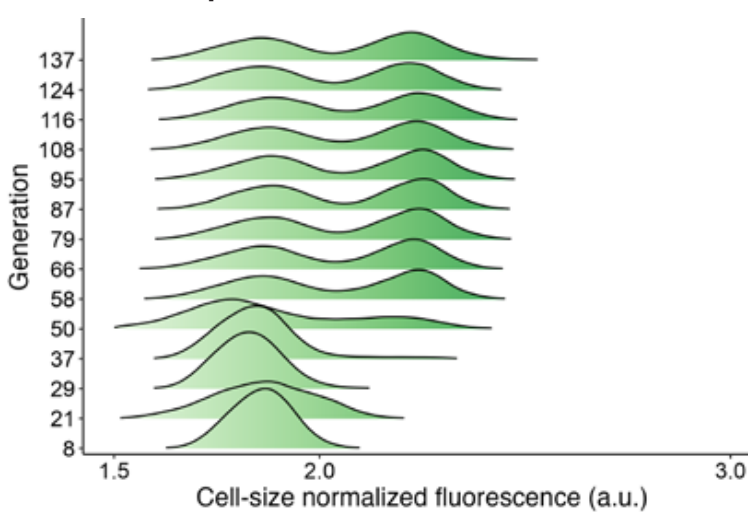**LTR $\Delta$  Population 7**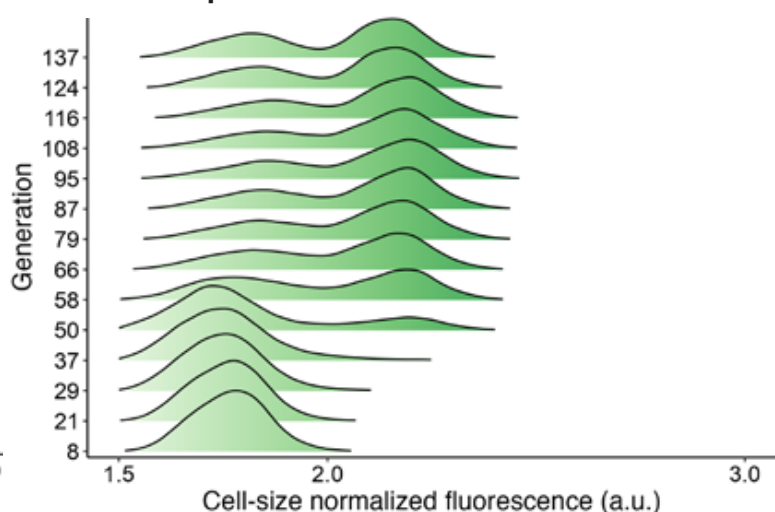

# LTR $\Delta$ Population 8

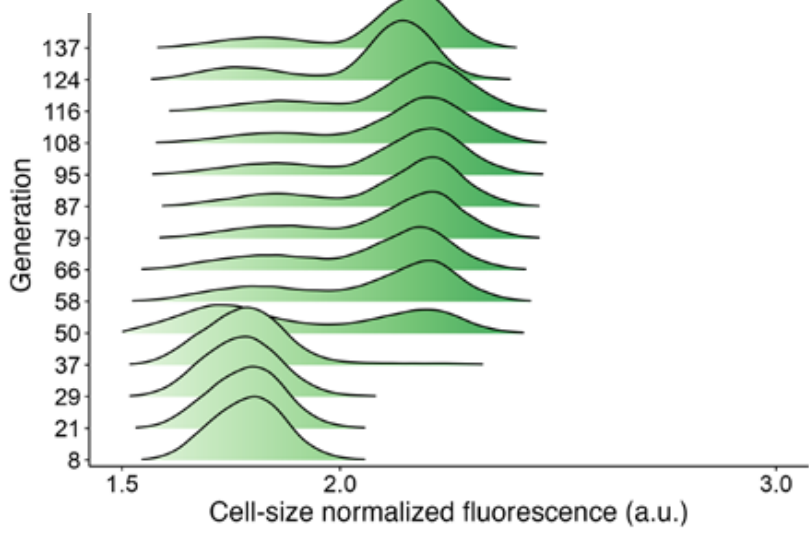

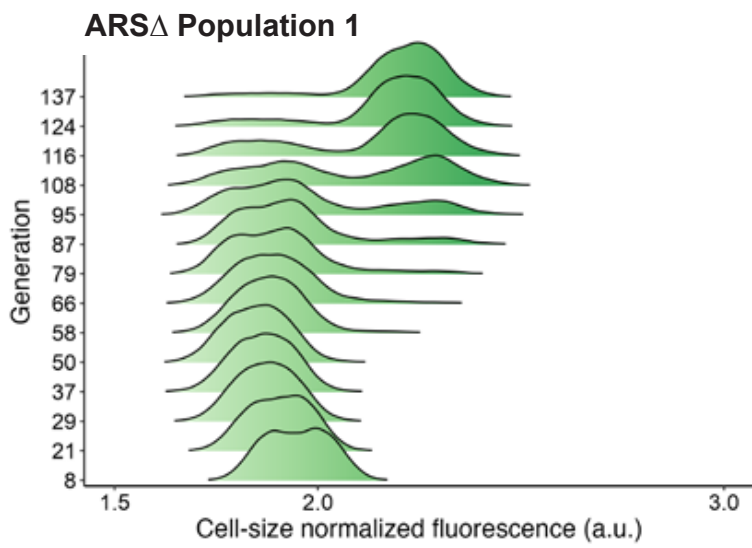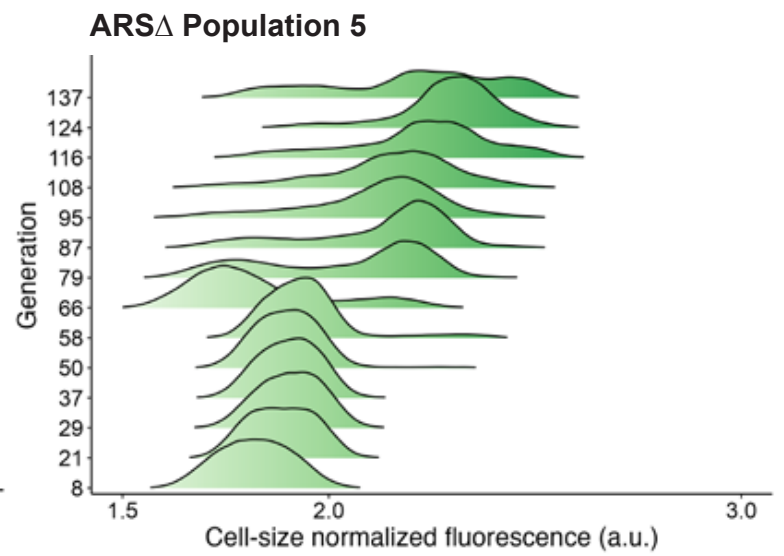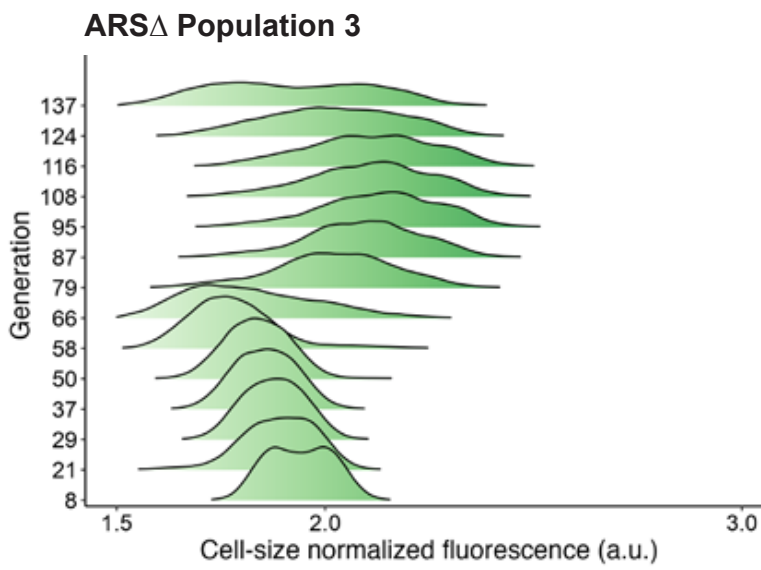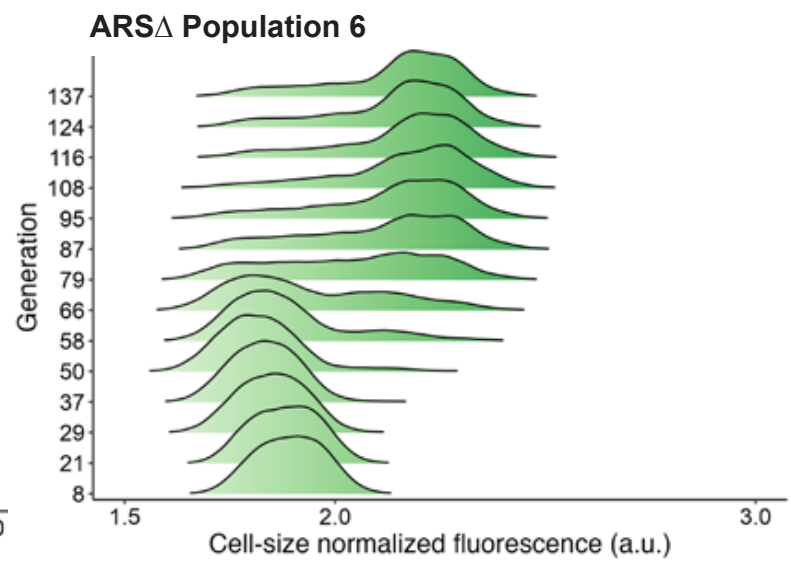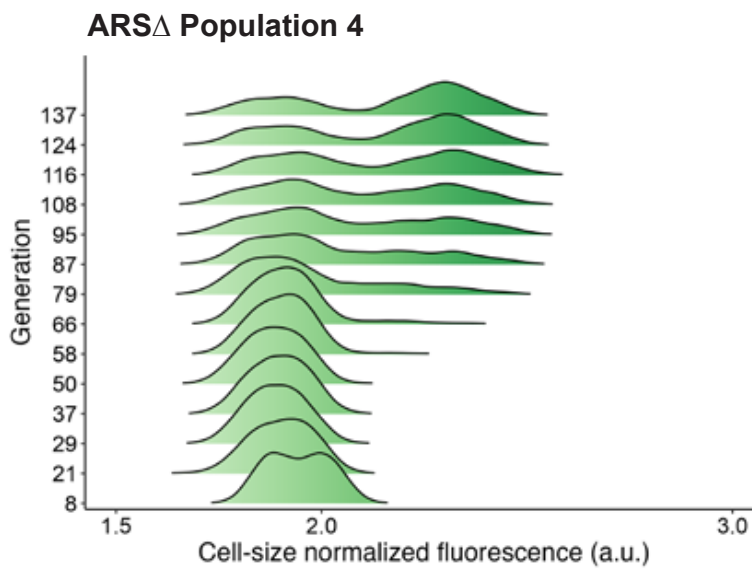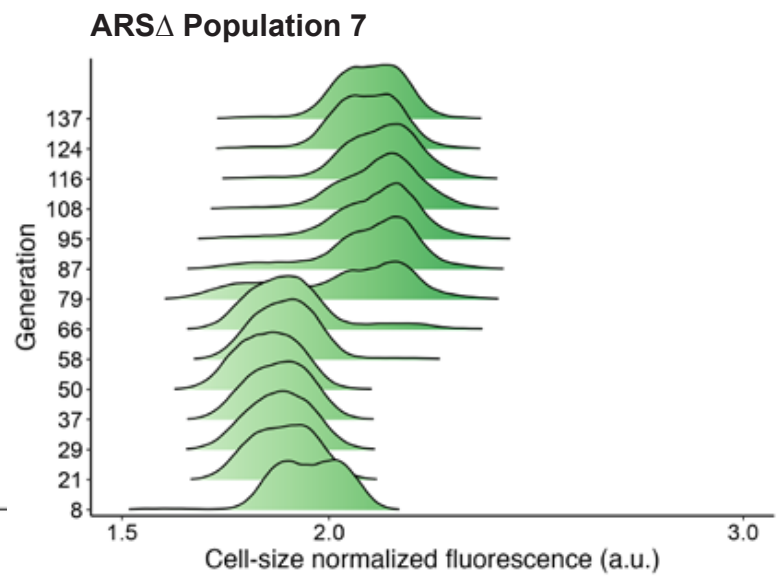

# ARS $\Delta$ Population 8

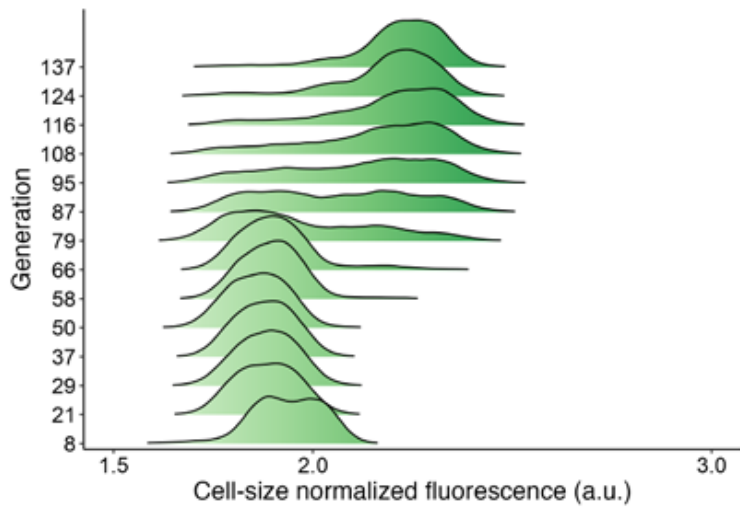

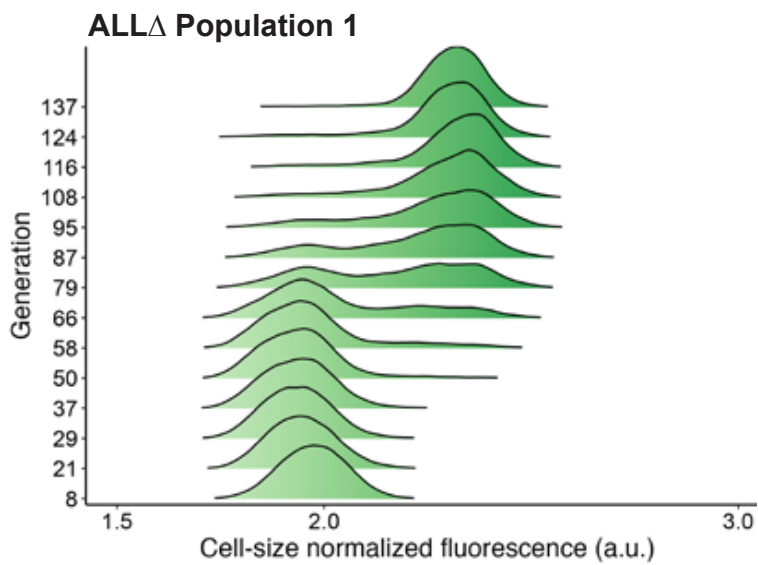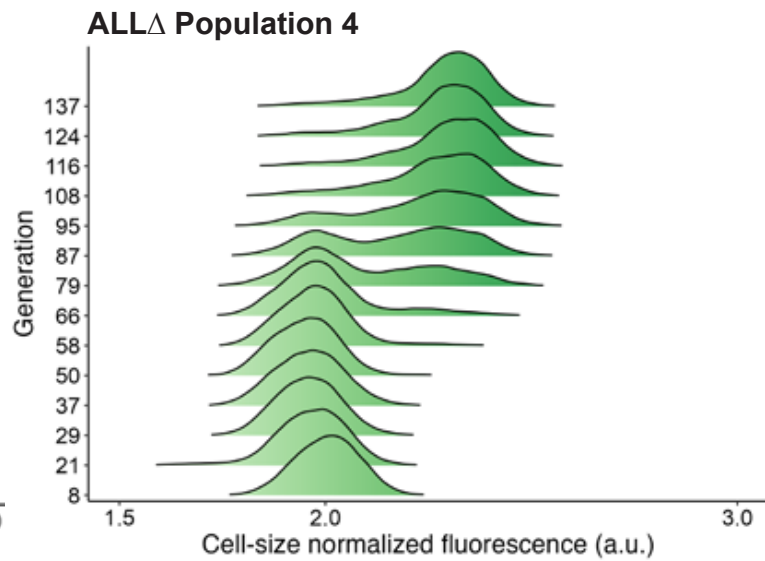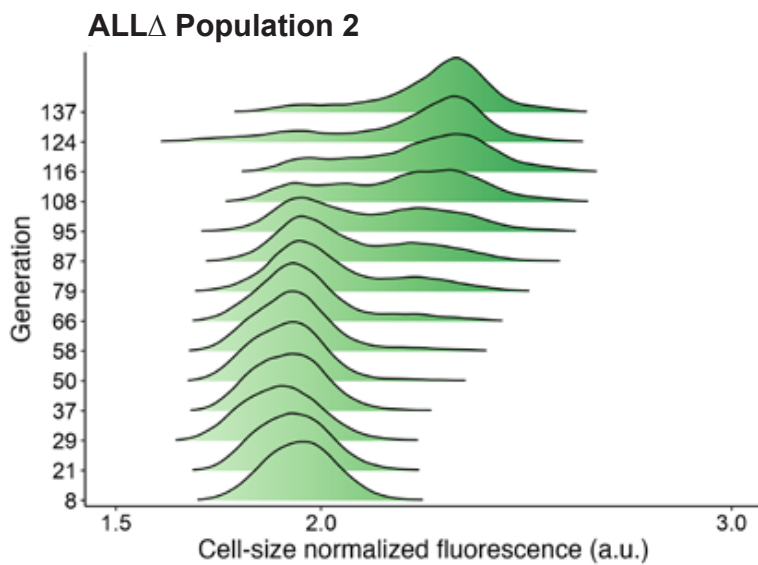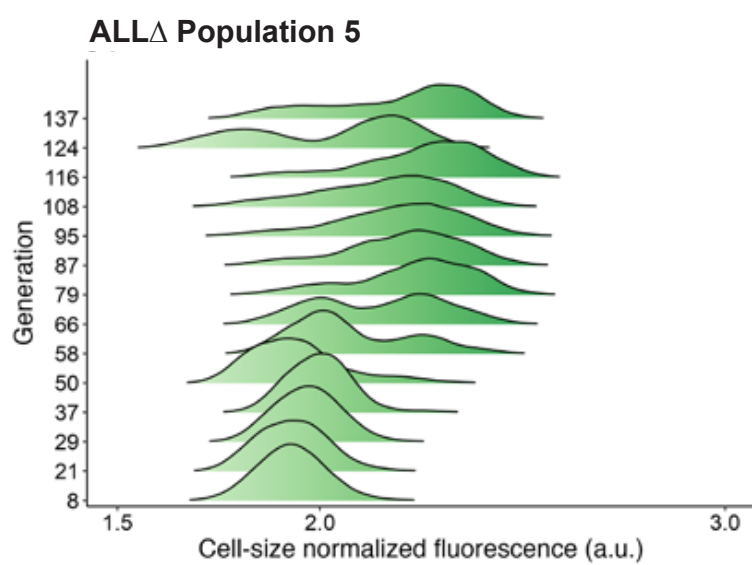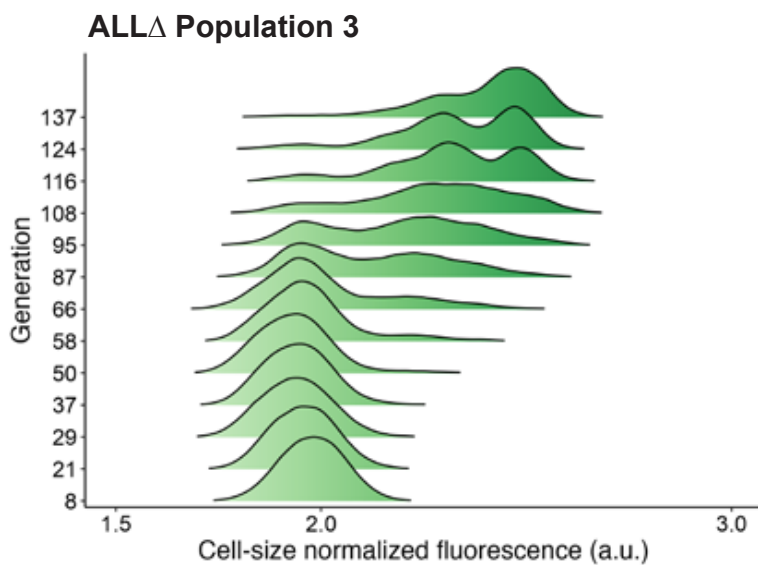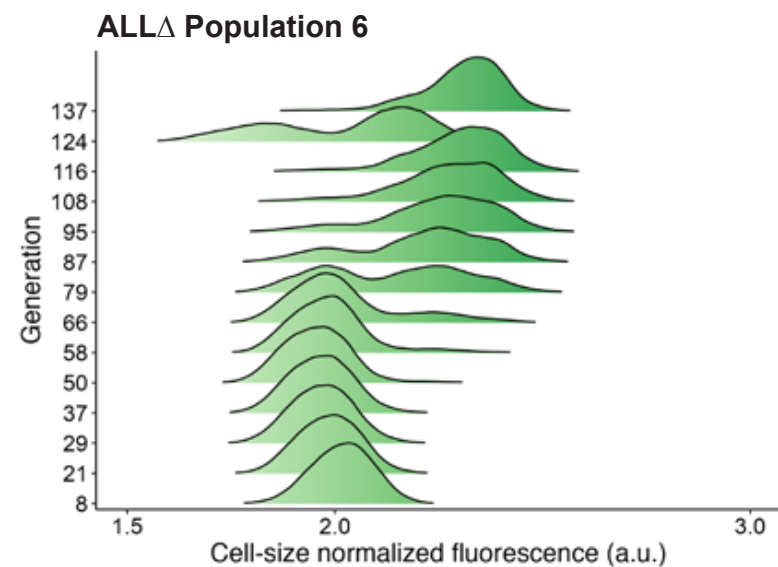

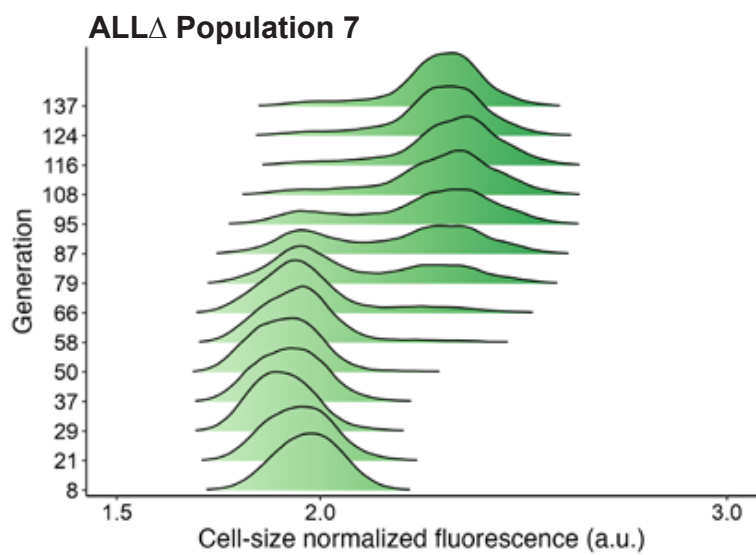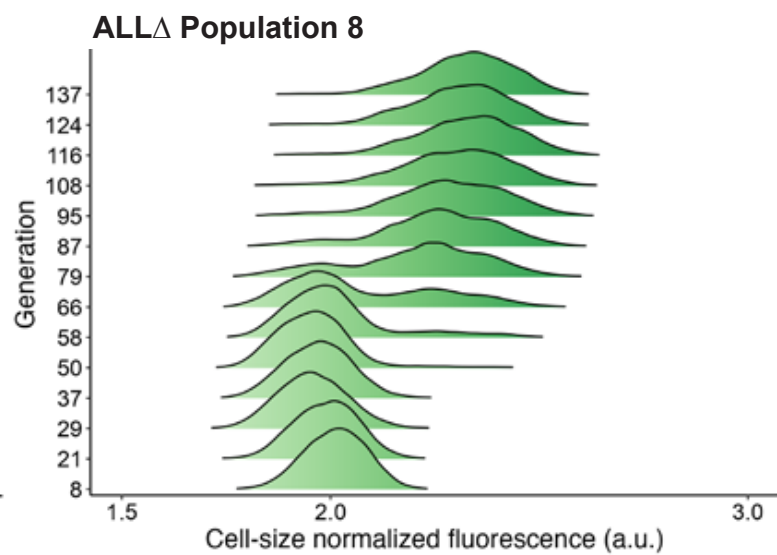

Supplement: fig2-data2 [file elife-98934-fig2-data2-v1.pdf]
