# Supplementary material for: Template switching during DNA replication is a prevalent source of adaptive gene amplification
Source: eLife. 2025 Feb 3;13:RP98934. doi: 10.7554/eLife.98934 (PMC11790251; doi:10.7554/eLife.98934)
Supplement: Supplementary file 2. — The coverage, defining the probability that the true parameter falls within the 95% highest density interval (HDI) of the posterior distribution, for 829 synthetic simulations in which the final reported GAP1 CNV proportion is at least 0.3. 95% HDI was calculated for each simulation using 200 posterior samples. Our neural density estimator is slightly over-confident for φ (coverage of 0.934), and under-confident for GAP1 CNV selection coefficient and formation rate (coverage of 0.992 for sC and 0.995 for δC). Despite this under-confidence, the posterior distributions are narrow in biological terms: the 95% HDI represents less than an order of magnitude for both sC and δC. Thus, we did not apply post-training adjustments to the neural density estimator, such as calibration (Cook et al., 2006) or ensembles (Caspi et al., 2023; Hermans et al., 2022). [file elife-98934-supp2.xlsx]

## Sheet: Sheet1
Parameter	Coverage
	0.992
	0.995
	0.934
