# Supplementary material for: Template switching during DNA replication is a prevalent source of adaptive gene amplification
Source: eLife. 2025 Feb 3;13:RP98934. doi: 10.7554/eLife.98934 (PMC11790251; doi:10.7554/eLife.98934)
Supplement: Supplementary file 4. — Counts of inferred CNV mechanisms for each sequenced clone, n=177, separated by strain [file elife-98934-supp4.xlsx]

## Sheet: Supplementary_Table_3
CNV Mechanism	Wildtype architecture	LTR∆	ARS∆	ALL∆	Total
Aneuploid	1	5	0	0	6
Complex CNV	3	3	3	14	23
LTR NAHR	11	0	27	0	38
NAHR	0	2	1	1	4
ODIRA	22	42	11	12	87
Transposon-mediated	0	0	0	19	19
Total	37	52	42	46	177
