# Supplementary material for: Template switching during DNA replication is a prevalent source of adaptive gene amplification
Source: eLife. 2025 Feb 3;13:RP98934. doi: 10.7554/eLife.98934 (PMC11790251; doi:10.7554/eLife.98934)
Supplement: Supplementary file 7. [file elife-98934-supp7.xlsx]

## Sheet: Sheet1
Strain Name	Purpose	Genotype
DGY1657	WT strain	S288C MATa ChrXI:513945::ACT1pr::mCitrine::ADH1term::TEFpr::KanMX::TEFterm
DGY2076	LTR∆ strain	S288C MATa LTR YKRCδ11∆0 ChrXI:513945::ACT1pr::mCitrine::ADH1term::TEFpr::KanMX::TEFterm LTR YKRCδ12∆0
DGY2150	ARS∆ strain	S288C MATa ChrXI:513945::ACT1pr::mCitrine::ADH1term::TEFpr::KanMX::TEFterm ARS1116∆0
DGY2071	ALL∆ strain	S288C MATa LTR YKRCδ11∆0 ChrXI:513945::ACT1pr::mCitrine::ADH1term::TEFpr::KanMX::TEFterm ARS1116∆0 LTR YKRCδ12∆0
DGY1	0-GFP-copy control strain	S288C MATa
DGY500	1-GFP copy control strain	S288C MATa HOΔ0::ACT1pr::mCitrine::ADH1term::TEFpr::KanMX::TEFterm
DGY1315	2-GFP-copy control strain	S288C MATa HOΔ0::ACT1pr::mCitrine::ADH1term::TEFpr::KanMX::TEFterm/YLR123CΔ0::ACT1pr::mCitrine::ADH1term::TEFpr::KanMX::TEFterm
